# Supplementary material for: Comparative venom gland transcriptomics of Naja kaouthia (monocled cobra) from Malaysia and Thailand: elucidating geographical venom variation and insights into sequence novelty
Source: PeerJ. 2017 Apr 5;5:e3142. doi: 10.7717/peerj.3142 (PMC5384570; doi:10.7717/peerj.3142)
Supplement: Supplemental Information 1 [file peerj-05-3142-s001.xlsx]

## Sheet: Mas_all
Malaysian Naja kaouthia Venom Gland Transcriptome (Updated 1/6/2016)
geneID	geneLength	NK_rawfragments(21279975)	NK_FPKM	Nr-ID	Nr-Score	Nr-Evalue	Nr-annotation
Unigene29221_NK	837	1956696	109857	gi|2500802|sp|Q98961.1|CX5_NAJAT	164.1	7e-39	RecName: Full=Cytotoxin 5; AltName: Full=Cardiotoxin-5; Flags: Precursor >gi|1661036|gb|AAB18385.1| cardiotoxin 5 [Naja atra]
CL3063.Contig2_NK	367	518955	66449.6	gi|58176997|pdb|1V6P|A	145.6	6e-34	Chain A, Crystal Structure Of Cobrotoxin >gi|58176998|pdb|1V6P|B Chain B, Crystal Structure Of Cobrotoxin >gi|157830661|pdb|1COD|A Chain A, Solution Conformation Of Cobrotoxin: A Nuclear Magnetic Resonance And Hybrid Distance Geometry-Dynamical Simulated Annealing Study >gi|157830662|pdb|1COE|A Chain A, Solution Conformation Of Cobrotoxin: A Nuclear Magnetic Resonance And Hybrid Distance Geometry…
CL3063.Contig1_NK	364	452516	58420	gi|28380029|sp|P59276.1|CBTC_NAJKA	145.2	9e-34	RecName: Full=Cobrotoxin-c; Short=CBT-c; AltName: Full=Short neurotoxin 2; Short=NT2 >gi|14719477|pdb|1JE9|A Chain A, Nmr Solution Structure Of Nt2
Unigene29220_NK	375	400973	50247.3	gi|123910516|sp|Q2VBP1.1|NXS11_OPHHA	91.7	1e-17	RecName: Full=Short neurotoxin SNTX11; Flags: Precursor >gi|82570087|gb|ABB83628.1| short chain neurotoxin precursor [Ophiophagus hannah]
Unigene29218_NK	851	658499	36362.6	gi|311033516|sp|P82935.2|TXWW_NAJKA	192.6	2e-47	RecName: Full=Weak tryptophan-containing neurotoxin; Short=WTX; Flags: Precursor
CL239.Contig2_NK	716	149764	9829.32	gi|194739365|gb|ACF94325.1|	442.2	1e-122	cytochrome c oxidase subunit I [Naja atra]
Unigene31181_NK	705	143565	9569.48	gi|164420841|ref|YP_001648790.1|	192.6	1e-47	cytochrome c oxidase subunit II [Naja naja] >gi|209886915|ref|YP_002290769.1| cytochrome c oxidase subunit II [Naja atra] >gi|84371453|gb|ABC55907.1| cytochrome oxidase subunit 2 [Naja naja] >gi|194395405|gb|ACF60244.1| cytochrome c oxidase subunit II [Naja atra]
Unigene29219_NK	504	102548	9561.49	gi|46396562|sp|Q9YGJ5.1|NXSA2_NAJSP	63.9	3e-09	RecName: Full=Alpha-neurotoxin NTX-2; Flags: Precursor >gi|3860085|gb|AAD08813.1| post synaptic alpha neurotoxin precursor [Naja sputatrix]
CL2753.Contig1_NK	218	33981	7325.02	gi|2500805|sp|Q91996.1|CX7P_NAJAT	150.2	2e-35	RecName: Full=Cardiotoxin 7&apos;&apos;; Flags: Precursor >gi|1326089|gb|AAB01540.1| cardiotoxin VII [Naja atra] >gi|1399220|gb|AAB03219.1| cardiotoxin 7&apos;&apos; [Naja atra] >gi|1661040|gb|AAB18387.1| cardiotoxin 7&apos; [Naja atra] >gi|1688223|gb|AAB36928.1| cardiotoxin 7&apos;&apos; [Naja atra]
CL5128.Contig2_NK	1725	265455	7231.54	gi|24638468|sp|P00596.2|PA2A1_NAJKA	327.4	1e-87	RecName: Full=Acidic phospholipase A2 1; Short=svPLA2; AltName: Full=CM-II; AltName: Full=NnkPLA-I; AltName: Full=Phosphatidylcholine 2-acylhydrolase; Flags: Precursor >gi|4115521|dbj|BAA36403.1| phospholipase A2 [Naja kaouthia]
CL3707.Contig2_NK	446	65984	6952.37	gi|164420839|ref|YP_001648788.1|	221.5	9e-57	NADH dehydrogenase subunit 2 [Naja naja] >gi|83031520|gb|ABB96919.1| NADH dehydrogenase subunit 2 [Naja atra] >gi|84371451|gb|ABC55905.1| NADH dehydrogenase subunit 2 [Naja naja]
Unigene31433_NK	257	33562	6136.82	gi|128930|sp|P01391.1|NXL1_NAJKA	165.6	6e-40	RecName: Full=Alpha-elapitoxin-Nk2a; Short=Alpha-EPTX-Nk2a; AltName: Full=Alpha-cobratoxin; Short=Alpha-CbT; Short=Cbtx; AltName: Full=Long neurotoxin 1; AltName: Full=Neurotoxin 3 >gi|27065484|pdb|1LXG|A Chain A, Solution Structure Of Alpha-Cobratoxin Complexed With A Cognate Peptide (Structure Ensemble) >gi|27065486|pdb|1LXH|A Chain A, Solution Structure Of Alpha-Cobratoxin Complexed With A Cog…
CL2966.Contig2_NK	1697	218542	6051.76	gi|339906295|ref|YP_004733096.1|	406.8	1e-111	cytochrome c oxidase subunit I [Nerodia sipedon] >gi|335892892|gb|AEH59652.1| cytochrome c oxidase subunit I [Nerodia sipedon]
Unigene31180_NK	1104	138094	5878.07	gi|164420843|ref|YP_001648792.1|	303.5	1e-80	ATP synthase F0 subunit 6 [Naja naja] >gi|209886917|ref|YP_002290771.1| ATP synthase F0 subunit 6 [Naja atra] >gi|84371455|gb|ABC55909.1| ATPase subunit 6 [Naja naja] >gi|194395407|gb|ACF60246.1| ATP synthase F0 subunit 6 [Naja atra] >gi|194739367|gb|ACF94327.1| ATP synthase F0 subunit 6 [Naja atra]
Unigene29811_NK	312	38600	5813.82	gi|197726031|gb|ACH73168.1|	202.2	6e-51	kaouthin-2 precursor [Naja kaouthia]
CL2221.Contig1_NK	228	25905	5339.22	gi|470594802|ref|XP_004310480.1|	107.8	1e-22	PREDICTED: polyubiquitin-C, partial [Tursiops truncatus]
Unigene31432_NK	574	64035	5242.45	gi|45383816|ref|NP_989479.1|	142.9	8e-33	protein S100-A6 [Gallus gallus] >gi|3024592|sp|Q98953.1|S10A6_CHICK RecName: Full=Protein S100-A6; AltName: Full=Calcyclin; AltName: Full=S100 calcium-binding protein A6 >gi|1667484|gb|AAB18788.1| calcyclin [Gallus gallus]
CL532.Contig1_NK	2409	266603	5200.64	gi|209886918|ref|YP_002290772.1|	471.9	7e-131	cytochrome c oxidase subunit III [Naja atra] >gi|194395408|gb|ACF60247.1| cytochrome c oxidase subunit III [Naja atra]
CL3065.Contig1_NK	2646	285122	5063.72	gi|63146076|gb|AAY33972.1|	1005	0	PDI [Oxyuranus scutellatus scutellatus]
CL5055.Contig1_NK	1007	96279	4492.94	gi|18378015|gb|AAL66856.1|	473.8	6e-132	NADH dehydrogenase subunit 1 [Naja kaouthia]
CL1038.Contig1_NK	886	79047	4192.57	gi|11275218|pir||A59218	510	6e-143	nerve growth factor beta chain precursor - monocled cobra
CL4674.Contig2_NK	255	20861	3844.36	gi|14194609|sp|Q9MLJ3.1|CYB_NAJKA	151.4	1e-35	RecName: Full=Cytochrome b; AltName: Full=Complex III subunit 3; AltName: Full=Complex III subunit III; AltName: Full=Cytochrome b-c1 complex subunit 3; AltName: Full=Ubiquinol-cytochrome-c reductase complex cytochrome b subunit >gi|7141217|gb|AAF37254.1| cytochrome b [Naja kaouthia]
Unigene31177_NK	538	43368	3788.05	gi|343407494|gb|AEM23753.1|	309.3	5e-83	NADH dehydrogenase subunit 4, partial (mitochondrion) [Naja kaouthia]
CL4112.Contig2_NK	755	60360	3756.91	gi|327285618|ref|XP_003227530.1|	136.7	1e-30	PREDICTED: beta-2-microglobulin-like isoform 1 [Anolis carolinensis] >gi|327285620|ref|XP_003227531.1| PREDICTED: beta-2-microglobulin-like isoform 2 [Anolis carolinensis]
CL2446.Contig3_NK	503	38858	3630.29	gi|71041970|pdb|1XX5|A	366.7	2e-100	Chain A, Crystal Structure Of Natrin From Naja Atra Snake Venom >gi|71041971|pdb|1XX5|B Chain B, Crystal Structure Of Natrin From Naja Atra Snake Venom >gi|71041972|pdb|1XX5|C Chain C, Crystal Structure Of Natrin From Naja Atra Snake Venom >gi|119389589|pdb|2GIZ|A Chain A, Structural And Functional Analysis Of Natrin, A Member Of Crisp-3 Family Blocks A Variety Of Ion Channels >gi|119389590|pdb|2…
Unigene13697_NK	1543	108077	3291.52	gi|471367241|ref|XP_004374150.1|	440.3	1e-121	PREDICTED: actin, cytoplasmic 2 [Trichechus manatus latirostris]
CL3321.Contig2_NK	1966	135952	3249.61	gi|14194609|sp|Q9MLJ3.1|CYB_NAJKA	435.6	4e-120	RecName: Full=Cytochrome b; AltName: Full=Complex III subunit 3; AltName: Full=Complex III subunit III; AltName: Full=Cytochrome b-c1 complex subunit 3; AltName: Full=Ubiquinol-cytochrome-c reductase complex cytochrome b subunit >gi|7141217|gb|AAF37254.1| cytochrome b [Naja kaouthia]
CL3374.Contig1_NK	1158	73692	2990.48	gi|406829591|gb|AFS63888.1|	448.4	3e-124	GPX3 [Thamnophis elegans]
Unigene6564_NK	337	21229	2960.25	gi|431918153|gb|ELK17381.1|	195.3	7e-49	60S ribosomal protein L26-like 1 [Pteropus alecto]
Unigene22312_NK	1330	83066	2934.95	gi|345543|pir||JC1348	80.1	2e-13	hypothetical 18K protein - goldfish mitochondrion
CL706.Contig1_NK	584	35855	2885.13	gi|444727734|gb|ELW68212.1|	339.3	6e-92	Actin, cytoplasmic 2 [Tupaia chinensis]
Unigene31408_NK	228	13851	2854.8	gi|54035743|sp|Q91132.1|CO3_NAJKA	156.4	3e-37	RecName: Full=Cobra venom factor; Short=CVF; Short=CVFk; AltName: Full=Complement C3 homolog; Contains: RecName: Full=Cobra venom factor alpha chain; Contains: RecName: Full=Cobra venom factor gamma chain; Contains: RecName: Full=Cobra venom factor beta chain; Flags: Precursor >gi|2118405|pir||I51018 cobra venom factor precursor - monocled cobra >gi|319443754|pdb|3PRX|B Chain B, Structure Of Comp…
Unigene6569_NK	417	25316	2852.91	gi|46397021|sp|Q9DEQ3.1|TXL1_NAJAT	176	4e-43	RecName: Full=Neurotoxin homolog NL1; Flags: Precursor
CL5219.Contig1_NK	201	12185	2848.78	gi|12230755|sp|P82463.1|TXML2_NAJKA	140.2	2e-32	RecName: Full=Muscarinic toxin-like protein 2; Short=MTLP-2
Unigene22311_NK	252	14900	2778.53	gi|194739363|gb|ACF94323.1|	92.4	7e-18	NADH dehydrogenase subunit 1 [Naja atra]
CL5228.Contig1_NK	1644	94041	2688.09	--	--	--	--
CL3055.Contig1_NK	520	29584	2673.51	gi|197726031|gb|ACH73168.1|	239.6	4e-62	kaouthin-2 precursor [Naja kaouthia]
Unigene31178_NK	1118	62580	2630.41	gi|194739374|gb|ACF94334.1|	324.3	7e-87	NADH dehydrogenase subunit 6 [Naja atra]
CL3495.Contig1_NK	890	46665	2463.94	gi|125050|sp|P20229.1|IVBIT_NAJNA	125.6	3e-27	RecName: Full=Protease inhibitor; AltName: Full=Venom trypsin inhibitor
Unigene31407_NK	3400	178076	2461.25	gi|54035743|sp|Q91132.1|CO3_NAJKA	2233.8	0	RecName: Full=Cobra venom factor; Short=CVF; Short=CVFk; AltName: Full=Complement C3 homolog; Contains: RecName: Full=Cobra venom factor alpha chain; Contains: RecName: Full=Cobra venom factor gamma chain; Contains: RecName: Full=Cobra venom factor beta chain; Flags: Precursor >gi|2118405|pir||I51018 cobra venom factor precursor - monocled cobra >gi|319443754|pdb|3PRX|B Chain B, Structure Of Comp…
CL2051.Contig1_NK	1368	69593	2390.61	gi|391359383|sp|D3TTC2.1|VM3H_NAJAT	763.1	0	RecName: Full=Zinc metalloproteinase-disintegrin atragin; AltName: Full=Snake venom metalloproteinase; Short=SVMP; Flags: Precursor >gi|224482347|gb|ACN50006.1| atragin precursor [Naja atra]
Unigene6570_NK	847	42710	2369.6	gi|327278436|ref|XP_003223968.1|	203	1e-50	PREDICTED: lymphocyte antigen 6E-like [Anolis carolinensis]
CL2345.Contig1_NK	297	14195	2245.99	gi|449274204|gb|EMC83487.1|	134	2e-30	Elongation factor 1-alpha 2, partial [Columba livia]
CL2446.Contig2_NK	655	29349	2105.62	gi|48428841|sp|Q7ZZN8.1|CRVP2_NAJAT	358.6	1e-97	RecName: Full=Natrin-2; AltName: Full=Cysteine-rich venom protein 2; AltName: Full=NA-CRVP2; AltName: Full=Protein G2b; Flags: Precursor >gi|30172003|gb|AAP20603.1| cysteine-rich venom protein [Naja atra]
CL2461.Contig1_NK	245	10974	2104.88	--	--	--	--
Unigene23031_NK	273	12168	2094.52	gi|465955599|gb|EMP26515.1|	110.9	1e-23	Polyubiquitin-C, partial [Chelonia mydas]
Unigene31072_NK	590	26082	2077.39	gi|317412168|sp|D9IX97.1|VNP_NAJAT	74.3	3e-12	RecName: Full=Natriuretic peptide Na-NP; Flags: Precursor >gi|300430031|gb|ADK12001.1| natriuretic peptide [Naja atra]
CL2446.Contig1_NK	213	9392	2072.08	gi|48428837|sp|Q7T1K6.1|CRVP1_NAJAT	62	1e-08	RecName: Full=Natrin-1; AltName: Full=Cysteine-rich venom protein 1; AltName: Full=NA-CRVP1; AltName: Full=Protein G2a; Flags: Precursor >gi|32492059|gb|AAP85301.1| natrin [Naja atra]
Unigene14558_NK	561	23836	1996.64	gi|470620201|ref|XP_004318392.1|	281.6	1e-74	PREDICTED: 60S ribosomal protein L23 [Tursiops truncatus]
Unigene31437_NK	543	22922	1983.73	gi|348507607|ref|XP_003441347.1|	57.4	3e-07	PREDICTED: hypothetical protein LOC100699101 [Oreochromis niloticus]
Unigene31409_NK	1310	54315	1948.4	gi|54035743|sp|Q91132.1|CO3_NAJKA	816.6	0	RecName: Full=Cobra venom factor; Short=CVF; Short=CVFk; AltName: Full=Complement C3 homolog; Contains: RecName: Full=Cobra venom factor alpha chain; Contains: RecName: Full=Cobra venom factor gamma chain; Contains: RecName: Full=Cobra venom factor beta chain; Flags: Precursor >gi|2118405|pir||I51018 cobra venom factor precursor - monocled cobra >gi|319443754|pdb|3PRX|B Chain B, Structure Of Comp…
Unigene23263_NK	641	25517	1870.68	--	--	--	--
Unigene31445_NK	477	18822	1854.28	gi|426244196|ref|XP_004015912.1|	268.1	9e-71	PREDICTED: 40S ribosomal protein S15a-like [Ovis aries]
Unigene6589_NK	1796	68734	1798.43	gi|348549840|ref|XP_003460741.1|	322.4	5e-86	PREDICTED: hypothetical protein LOC100717127 [Cavia porcellus]
Unigene14274_NK	390	14824	1786.2	gi|471407667|ref|XP_004385420.1|	184.9	1e-45	PREDICTED: 60S ribosomal protein L23a [Trichechus manatus latirostris]
Unigene31353_NK	749	27943	1753.15	gi|290560289|pdb|3K7L|A	230.7	5e-59	Chain A, Structures Of Two Elapid Snake Venom Metalloproteases With Distinct Activities Highlight The Disulfide Patterns In The D Domain Of Adamalysin Family Proteins
Unigene6566_NK	609	22632	1746.36	gi|327287930|ref|XP_003228681.1|	380.2	3e-104	PREDICTED: 40S ribosomal protein S4-like [Anolis carolinensis]
Unigene6562_NK	613	22743	1743.48	gi|28804817|dbj|BAC57970.1|	286.2	7e-76	alpha globin [Naja kaouthia]
Unigene31456_NK	282	10233	1705.23	gi|466038075|ref|XP_004275750.1|	133.3	3e-30	PREDICTED: 60S ribosomal protein L38 [Orcinus orca]
Unigene31446_NK	399	14170	1668.88	gi|327262875|ref|XP_003216249.1|	204.5	1e-51	PREDICTED: 60S ribosomal protein L37-like [Anolis carolinensis]
Unigene31439_NK	1008	35432	1651.83	gi|327290569|ref|XP_003229995.1|	572.4	1e-161	PREDICTED: 40S ribosomal protein S2-like [Anolis carolinensis]
Unigene31410_NK	551	18402	1569.43	gi|54035743|sp|Q91132.1|CO3_NAJKA	65.9	1e-09	RecName: Full=Cobra venom factor; Short=CVF; Short=CVFk; AltName: Full=Complement C3 homolog; Contains: RecName: Full=Cobra venom factor alpha chain; Contains: RecName: Full=Cobra venom factor gamma chain; Contains: RecName: Full=Cobra venom factor beta chain; Flags: Precursor >gi|2118405|pir||I51018 cobra venom factor precursor - monocled cobra >gi|319443754|pdb|3PRX|B Chain B, Structure Of Comp…
Unigene15627_NK	486	16054	1552.3	gi|73917399|sp|Q69CJ9.3|RL35_OPHHA	238.4	8e-62	RecName: Full=60S ribosomal protein L35 >gi|38049476|gb|AAR10441.1| ribosomal protein L35 [Ophiophagus hannah]
Unigene31440_NK	578	18995	1544.33	gi|71895103|ref|NP_001026004.1|	316.2	5e-85	40S ribosomal protein S11 [Gallus gallus] >gi|13516490|dbj|BAB40319.1| ribosomal protein S11 [Gallus gallus]
Unigene27446_NK	2667	86162	1518.17	gi|327283838|ref|XP_003226647.1|	1248	0	PREDICTED: polyadenylate-binding protein 1-like [Anolis carolinensis]
CL76.Contig1_NK	5440	164990	1425.24	gi|327271319|ref|XP_003220435.1|	32	2e-14	PREDICTED: UHRF1-binding protein 1-like [Anolis carolinensis]
Unigene31179_NK	1806	53897	1402.41	gi|164420848|ref|YP_001648797.1|	834.3	0	NADH dehydrogenase subunit 5 [Naja naja] >gi|84371460|gb|ABC55914.1| NADH dehydrogenase subunit 5 [Naja naja]
Unigene31438_NK	446	13276	1398.82	gi|297304673|ref|XP_002806420.1|	115.9	5e-25	PREDICTED: hypothetical protein LOC100423472 [Macaca mulatta]
Unigene31441_NK	627	18115	1357.69	gi|444722537|gb|ELW63227.1|	254.2	3e-66	40S ribosomal protein S25 [Tupaia chinensis]
Unigene13603_NK	577	16190	1318.56	gi|332245592|ref|XP_003271942.1|	308.9	8e-83	PREDICTED: 40S ribosomal protein S18 isoform 1 [Nomascus leucogenys]
Unigene13449_NK	275	7711	1317.67	gi|327259999|ref|XP_003214823.1|	121.7	1e-26	PREDICTED: 60S acidic ribosomal protein P2-like [Anolis carolinensis]
Unigene31434_NK	1175	32306	1292.03	gi|338817704|sp|B6S2X0.1|CAMP_NAJAT	379.8	1e-103	RecName: Full=Cathelicidin-NA antimicrobial peptide; AltName: Full=Cathelicidin-related protein; Flags: Precursor >gi|193792525|gb|ACF21000.1| cathelicidin-related protein precursor [Naja atra]
Unigene239_NK	264	7026	1250.64	--	--	--	--
CL1593.Contig1_NK	3379	87921	1222.74	gi|465951230|gb|EMP24249.1|	1685.6	0	Elongation factor 2 [Chelonia mydas]
Unigene1151_NK	745	19372	1221.93	gi|327283014|ref|XP_003226237.1|	394	3e-108	PREDICTED: 60S ribosomal protein L13a-like [Anolis carolinensis]
CL96.Contig1_NK	621	16046	1214.24	--	--	--	--
Unigene31436_NK	923	23780	1210.71	gi|291415306|ref|XP_002723895.1|	131.3	6e-29	PREDICTED: hypothetical protein [Oryctolagus cuniculus]
Unigene6560_NK	860	22147	1210.17	gi|465951585|gb|EMP24441.1|	503.1	7e-141	60S acidic ribosomal protein P0 [Chelonia mydas]
Unigene6565_NK	1424	36110	1191.64	gi|465953164|gb|EMP25261.1|	264.2	1e-68	Apolipoprotein Eb [Chelonia mydas]
Unigene31449_NK	446	10975	1156.37	gi|310756796|gb|ADP20539.1|	239.2	4e-62	40S ribosomal protein S26 [Fukomys anselli] >gi|310756798|gb|ADP20540.1| 40S ribosomal protein S26 [Heterocephalus glaber]
Unigene514_NK	855	20995	1153.93	gi|75570172|sp|Q90WI8.1|CLEC1_BUNFA	312	2e-83	RecName: Full=C-type lectin BFL-1; Flags: Precursor >gi|13876735|gb|AAK43584.1|AF354270_1 C-type lectin-like protein 1 [Bungarus fasciatus]
Unigene13706_NK	201	4743	1108.88	--	--	--	--
CL3939.Contig5_NK	208	4890	1104.78	--	--	--	--
Unigene31444_NK	953	22351	1102.13	gi|52138653|ref|NP_001004379.1|	520.8	3e-146	60S ribosomal protein L7a [Gallus gallus] >gi|417673|sp|P32429.2|RL7A_CHICK RecName: Full=60S ribosomal protein L7a >gi|63778|emb|CAA44506.1| ribosomal protein L7a [Gallus gallus] >gi|601884|dbj|BAA03395.1| ribosomal protein L7a [Gallus gallus] >gi|28866784|dbj|BAC65169.1| ribosomal protein L7a [Gallus gallus]
CL3939.Contig4_NK	306	7129	1094.8	gi|327290871|ref|XP_003230145.1|	56.6	4e-07	PREDICTED: HLA class I histocompatibility antigen, A-69 alpha chain-like, partial [Anolis carolinensis]
CL5589.Contig1_NK	2058	47595	1086.79	--	--	--	--
CL2319.Contig1_NK	369	8524	1085.54	gi|327265789|ref|XP_003217690.1|	138.3	1e-31	PREDICTED: 60S ribosomal protein L29-like [Anolis carolinensis]
CL706.Contig3_NK	2196	50698	1084.89	gi|45269029|gb|AAS55927.1|	768.5	0	cytoskeletal beta actin, partial [Sus scrofa]
Unigene6571_NK	1016	23162	1071.3	gi|14194800|sp|Q9PRL9.1|HBA1_NAJNA	260	1e-67	RecName: Full=Hemoglobin subunit alpha-1; AltName: Full=Alpha-1-globin; AltName: Full=Hemoglobin alpha-1 chain; AltName: Full=Hemoglobin alpha-I chain >gi|913712|gb|AAB34003.1| hemoglobin alpha I chain [Naja naja=cobra snakes, naja, blood, Peptide, 141 aa]
Unigene6593_NK	667	15065	1061.38	gi|440913556|gb|ELR63001.1|	381.7	1e-104	60S ribosomal protein L17, partial [Bos grunniens mutus]
Unigene31451_NK	580	12856	1041.61	gi|334313876|ref|XP_001368281.2|	268.1	1e-70	PREDICTED: hypothetical protein LOC100013927 [Monodelphis domestica]
Unigene31448_NK	515	11362	1036.76	gi|465954254|gb|EMP25805.1|	242.7	5e-63	Ubiquitin-like protein FUBI [Chelonia mydas]
Unigene27776_NK	1062	23355	1033.44	gi|449513901|ref|XP_004176383.1|	42.7	1e-10	PREDICTED: uncharacterized protein LOC100225344 [Taeniopygia guttata]
Unigene31389_NK	610	13281	1023.13	gi|73537140|gb|AAZ77712.1|	113.2	8e-24	MHC class II beta chain [Sphenodon punctatus]
Unigene31443_NK	632	13690	1017.92	gi|395537564|ref|XP_003770768.1|	348.6	1e-94	PREDICTED: 40S ribosomal protein S10-like, partial [Sarcophilus harrisii]
CL2221.Contig2_NK	567	12202	1011.29	gi|395513211|ref|XP_003760822.1|	265.4	1e-69	PREDICTED: ubiquitin-60S ribosomal protein L40 [Sarcophilus harrisii]
CL2518.Contig1_NK	421	9059	1011.18	--	--	--	--
CL5151.Contig2_NK	378	7931	985.973	--	--	--	--
Unigene31453_NK	514	10623	971.21	gi|345329793|ref|XP_001513459.2|	292.7	4e-78	PREDICTED: 40S ribosomal protein S15-like [Ornithorhynchus anatinus]
Unigene13520_NK	431	8807	960.24	gi|122527|sp|P22743.1|HBB2_NAJNA	246.5	2e-64	RecName: Full=Hemoglobin subunit beta-2; AltName: Full=Beta-2-globin; AltName: Full=Hemoglobin beta-2 chain; AltName: Full=Hemoglobin beta-II chain
CL1005.Contig2_NK	1013	20539	952.793	gi|32469675|sp|P82942.1|VM3K_NAJKA	426.8	8e-118	RecName: Full=Hemorrhagic metalloproteinase-disintegrin kaouthiagin; AltName: Full=Snake venom metalloproteinase; Short=SVMP
Unigene6563_NK	683	13771	947.488	gi|426253563|ref|XP_004020462.1|	95.1	2e-18	PREDICTED: thymosin beta-4-like [Ovis aries]
Unigene31450_NK	649	13034	943.761	gi|327268884|ref|XP_003219225.1|	310.1	5e-83	PREDICTED: 60S ribosomal protein L24-like [Anolis carolinensis]
Unigene6921_NK	825	16333	930.338	gi|327271079|ref|XP_003220315.1|	427.2	4e-118	PREDICTED: 40S ribosomal protein S8-like [Anolis carolinensis]
CL4112.Contig1_NK	343	6744	923.958	--	--	--	--
Unigene31435_NK	1892	36974	918.341	gi|327264037|ref|XP_003216823.1|	807	0	PREDICTED: calreticulin-like [Anolis carolinensis]
CL562.Contig1_NK	1946	37937	916.113	--	--	--	--
Unigene31447_NK	628	12240	915.905	gi|348558842|ref|XP_003465225.1|	370.2	3e-101	PREDICTED: 60S ribosomal protein L18a-like [Cavia porcellus]
CL1005.Contig1_NK	1064	20467	903.944	gi|32469675|sp|P82942.1|VM3K_NAJKA	410.2	8e-113	RecName: Full=Hemorrhagic metalloproteinase-disintegrin kaouthiagin; AltName: Full=Snake venom metalloproteinase; Short=SVMP
Unigene24533_NK	1459	27912	899.01	gi|403334965|gb|EJY66653.1|	84.3	3e-101	hypothetical protein OXYTRI_13058 [Oxytricha trifallax]
Unigene22262_NK	1321	25084	892.325	gi|327285404|ref|XP_003227423.1|	611.7	2e-173	PREDICTED: zinc transporter 2-like [Anolis carolinensis]
Unigene31459_NK	866	15998	868.114	gi|327263697|ref|XP_003216654.1|	481.9	1e-134	PREDICTED: 40S ribosomal protein S6-like [Anolis carolinensis]
CL5565.Contig1_NK	2060	38047	867.925	gi|403309913|gb|AFR33841.1|	719.2	0	immunoglobulin M heavy chain constant region, partial [Orthriophis taeniurus]
Unigene31455_NK	889	16378	865.741	gi|82219689|sp|Q98TX2.3|RS3A_OPHHA	529.6	7e-149	RecName: Full=40S ribosomal protein S3a >gi|12958634|gb|AAK09383.1|AF321768_1 ribosomal protein S3a [Ophiophagus hannah]
Unigene22128_NK	3292	59848	854.316	gi|426236749|ref|XP_004012330.1|	840.1	0	PREDICTED: elongation factor 1-alpha 1-like [Ovis aries]
Unigene31467_NK	545	9675	834.225	gi|327280376|ref|XP_003224928.1|	267.7	1e-70	PREDICTED: 60S ribosomal protein L32-like [Anolis carolinensis]
Unigene30355_NK	289	5024	816.922	--	--	--	--
Unigene6582_NK	572	9780	803.474	--	--	--	--
Unigene31462_NK	452	7676	798.041	gi|82216089|sp|Q8UW19.1|RL36_LAPHA	211.1	1e-53	RecName: Full=60S ribosomal protein L36 >gi|18000285|gb|AAL54904.1|AF159903_1 60S ribosomal protein L36 [Lapemis hardwickii]
Unigene6922_NK	485	8214	795.87	gi|327274943|ref|XP_003222234.1|	263.5	2e-69	PREDICTED: 60S ribosomal protein L14-like [Anolis carolinensis]
Unigene31465_NK	469	7917	793.262	gi|444727930|gb|ELW68403.1|	227.6	1e-58	Mitochondrial folate transporter/carrier [Tupaia chinensis]
CL4229.Contig1_NK	619	10448	793.179	gi|84029303|sp|P0C0U8.1|HBB1_DRYCE	265.8	1e-69	RecName: Full=Hemoglobin subunit beta-1; AltName: Full=Beta-1-globin; AltName: Full=Hemoglobin beta-1 chain; AltName: Full=Hemoglobin beta-I chain
Unigene6633_NK	1230	20666	789.551	gi|327272028|ref|XP_003220788.1|	392.1	3e-107	PREDICTED: endonuclease domain-containing 1 protein-like [Anolis carolinensis]
CL50.Contig2_NK	286	4776	784.742	gi|397498485|ref|XP_003820013.1|	156	4e-37	PREDICTED: heat shock cognate 71 kDa protein [Pan paniscus]
Unigene31442_NK	881	14596	778.551	gi|334329628|ref|XP_003341246.1|	224.2	6e-57	PREDICTED: hypothetical protein LOC100619384 [Monodelphis domestica]
Unigene31452_NK	1281	21163	776.349	gi|224062820|ref|XP_002200110.1|	703.7	0	PREDICTED: 60S ribosomal protein L4 [Taeniopygia guttata]
Unigene6559_NK	812	13409	776.013	gi|31873372|emb|CAD97677.1|	390.2	6e-107	hypothetical protein [Homo sapiens]
Unigene7860_NK	555	8841	748.578	--	--	--	--
Unigene31463_NK	690	10954	746.024	gi|449283666|gb|EMC90271.1|	379	1e-103	40S ribosomal protein S7, partial [Columba livia]
Unigene28764_NK	1974	31106	740.501	gi|327276168|ref|XP_003222842.1|	1129.8	0	PREDICTED: heat shock cognate 71 kDa protein-like [Anolis carolinensis]
CL4708.Contig1_NK	778	12147	733.7	gi|226372474|gb|ACO51862.1|	384.8	2e-105	Transposable element Tc1 transposase [Rana catesbeiana]
CL3786.Contig3_NK	832	12932	730.418	--	--	--	--
Unigene13630_NK	3675	56632	724.158	gi|327259929|ref|XP_003214788.1|	776.5	0	PREDICTED: nucleobindin-2-like [Anolis carolinensis]
Unigene13631_NK	1027	15717	719.164	--	--	--	--
CL3352.Contig2_NK	2136	32334	711.356	gi|161408085|dbj|BAF94146.1|	1035	0	heat shock protein 90a [Alligator mississippiensis]
CL216.Contig1_NK	1980	29415	698.124	--	--	--	--
Unigene30357_NK	828	12001	681.108	--	--	--	--
Unigene29144_NK	708	10258	680.861	gi|327271967|ref|XP_003220758.1|	223.4	7e-57	PREDICTED: pancreatic progenitor cell differentiation and proliferation factor-like [Anolis carolinensis]
Unigene31466_NK	498	7191	678.561	gi|327280582|ref|XP_003225031.1|	261.2	1e-68	PREDICTED: 60S ribosomal protein L28-like [Anolis carolinensis]
CL1925.Contig2_NK	2556	36862	677.715	gi|224073965|ref|XP_002192655.1|	1231.8	0	PREDICTED: 78 kDa glucose-regulated protein [Taeniopygia guttata]
CL689.Contig1_NK	2694	38606	673.42	--	--	--	--
Unigene6567_NK	330	4721	672.278	gi|449269808|gb|EMC80554.1|	163.3	3e-39	40S ribosomal protein S4, partial [Columba livia]
Unigene6568_NK	777	11053	668.479	gi|327285534|ref|XP_003227488.1|	397.5	3e-109	PREDICTED: 60S ribosomal protein L13-like [Anolis carolinensis]
Unigene31468_NK	465	6525	659.411	gi|449280784|gb|EMC88010.1|	252.3	5e-66	60S ribosomal protein L31 [Columba livia]
Unigene31461_NK	1030	14424	658.078	gi|395504470|ref|XP_003756572.1|	60.8	1e-07	PREDICTED: uncharacterized protein LOC100925129 [Sarcophilus harrisii]
Unigene31351_NK	363	5068	656.083	--	--	--	--
CL4730.Contig2_NK	500	6869	645.583	--	--	--	--
Unigene27155_NK	662	9004	639.155	gi|327266865|ref|XP_003218224.1|	317.8	2e-85	PREDICTED: neprilysin-like [Anolis carolinensis]
Unigene6579_NK	1166	15567	627.387	gi|88909649|sp|P84175.2|RS12_CHICK	267.7	8e-70	RecName: Full=40S ribosomal protein S12
Unigene22646_NK	349	4653	626.522	gi|470602254|ref|XP_004312818.1|	138.3	1e-31	PREDICTED: 40S ribosomal protein S28 [Tursiops truncatus]
Unigene31458_NK	599	7984	626.358	gi|410911834|ref|XP_003969395.1|	186.8	5e-46	PREDICTED: leucine-rich repeat-containing protein 71-like [Takifugu rubripes]
Unigene24661_NK	6804	87244	602.56	--	--	--	--
Unigene14240_NK	201	2567	600.149	gi|449265858|gb|EMC76988.1|	65.1	1e-09	60S ribosomal protein L34, partial [Columba livia]
CL4422.Contig1_NK	1198	15288	599.684	gi|327269474|ref|XP_003219519.1|	219.2	3e-55	PREDICTED: 60S acidic ribosomal protein P1-like [Anolis carolinensis]
Unigene31460_NK	1158	14614	593.047	gi|431890628|gb|ELK01507.1|	235.7	3e-60	Eukaryotic translation initiation factor 1 [Pteropus alecto]
Unigene13614_NK	2012	25387	592.942	gi|199584370|gb|AAF99282.2|AF256650_1	291.6	1e-76	MHC class II alpha chain [Caiman crocodilus]
Unigene25680_NK	1685	20966	584.715	gi|327266278|ref|XP_003217933.1|	672.2	0	PREDICTED: guanine nucleotide-binding protein subunit beta-2-like 1-like [Anolis carolinensis]
Unigene864_NK	1009	12521	583.145	gi|239618535|gb|ACR83840.1|	80.5	1e-13	cystatin precursor [Pseudonaja textilis]
Unigene951_NK	548	6769	580.461	gi|395748407|ref|XP_002826939.2|	191.8	1e-47	PREDICTED: uncharacterized protein LOC100432952 [Pongo abelii]
Unigene22648_NK	2180	26926	580.423	gi|327277318|ref|XP_003223412.1|	793.9	0	PREDICTED: 55 kDa erythrocyte membrane protein-like [Anolis carolinensis]
Unigene6581_NK	825	10121	576.499	gi|327281458|ref|XP_003225465.1|	479.2	1e-133	PREDICTED: 40S ribosomal protein S3-like [Anolis carolinensis]
Unigene6584_NK	703	8582	573.67	gi|318054482|gb|ADV35659.1|	181.8	2e-44	proopiomelanocortin [Agkistrodon piscivorus]
Unigene810_NK	821	9925	568.089	gi|327273495|ref|XP_003221516.1|	364.8	2e-99	PREDICTED: 60S ribosomal protein L9-like [Anolis carolinensis]
Unigene31454_NK	652	7759	559.226	gi|327281641|ref|XP_003225555.1|	314.3	2e-84	PREDICTED: 60S ribosomal protein L21-like [Anolis carolinensis]
Unigene31476_NK	911	10715	552.717	gi|327269687|ref|XP_003219624.1|	461.8	2e-128	PREDICTED: 60S ribosomal protein L7-like [Anolis carolinensis]
CL4263.Contig1_NK	2541	29817	551.427	gi|449495454|ref|XP_002191900.2|	47	8e-54	PREDICTED: uncharacterized protein LOC100228131 [Taeniopygia guttata]
Unigene6580_NK	870	10151	548.3	gi|38374146|gb|AAR19276.1|	310.8	5e-83	venom gland cyclophilin [Bitis gabonica]
Unigene25330_NK	1029	11761	537.103	gi|388452552|ref|NP_001253938.1|	563.1	7e-159	ADP/ATP translocase 2 [Macaca mulatta] >gi|178661|gb|AAA51737.1| adenine nucleotide translocator-2 [Homo sapiens] >gi|1381112|gb|AAB39266.1| ADP/ATP carrier protein [Homo sapiens] >gi|33525218|gb|AAH56160.1| Solute carrier family 25 (mitochondrial carrier; adenine nucleotide translocator), member 5 [Homo sapiens] >gi|119610276|gb|EAW89870.1| solute carrier family 25 (mitochondrial carrier; adenin…
Unigene6607_NK	399	4501	530.109	gi|326931897|ref|XP_003212060.1|	162.5	5e-39	PREDICTED: 40S ribosomal protein S21-like [Meleagris gallopavo]
CL785.Contig2_NK	596	6709	528.981	gi|82193158|sp|Q53B55.1|NXL31_OPHHA	72.8	1e-11	RecName: Full=Long neurotoxin-like OH-31; Flags: Precursor >gi|51105379|gb|AAT97253.1| long chain neurotoxin-like protein [Ophiophagus hannah]
Unigene31477_NK	566	6370	528.874	gi|392350286|ref|XP_003750613.1|	270	4e-71	PREDICTED: 40S ribosomal protein S17-like [Rattus norvegicus]
Unigene13732_NK	440	4916	525.035	--	--	--	--
Unigene14160_NK	533	5855	516.213	gi|327277659|ref|XP_003223581.1|	268.5	1e-70	PREDICTED: elongation factor 1-beta-like [Anolis carolinensis]
Unigene31478_NK	514	5607	512.621	gi|224046266|ref|XP_002198037.1|	236.5	4e-61	PREDICTED: 40S ribosomal protein S20 [Taeniopygia guttata] >gi|363730787|ref|XP_428540.3| PREDICTED: uncharacterized protein LOC430990 [Gallus gallus] >gi|387913924|gb|AFK10571.1| hypothetical protein [Callorhinchus milii]
Unigene14273_NK	256	2785	511.227	gi|327291940|ref|XP_003230678.1|	120.2	3e-26	PREDICTED: 60S ribosomal protein L23a-like [Anolis carolinensis]
Unigene21526_NK	698	7564	509.243	gi|327276214|ref|XP_003222865.1|	100.9	5e-20	PREDICTED: phospholipase A2 inhibitor subunit gamma B-like [Anolis carolinensis]
Unigene31474_NK	534	5750	506.006	gi|444730664|gb|ELW71038.1|	299.3	5e-80	40S ribosomal protein S19 [Tupaia chinensis]
Unigene31405_NK	205	2206	505.685	--	--	--	--
Unigene467_NK	984	10507	501.779	gi|327281159|ref|XP_003225317.1|	321.2	4e-86	PREDICTED: ferritin heavy chain A-like [Anolis carolinensis]
Unigene14093_NK	1094	11638	499.908	gi|327264405|ref|XP_003217004.1|	458.8	2e-127	PREDICTED: bax inhibitor 1-like isoform 1 [Anolis carolinensis] >gi|327264407|ref|XP_003217005.1| PREDICTED: bax inhibitor 1-like isoform 2 [Anolis carolinensis] >gi|327264409|ref|XP_003217006.1| PREDICTED: bax inhibitor 1-like isoform 3 [Anolis carolinensis]
Unigene31470_NK	742	7888	499.565	gi|327264270|ref|XP_003216937.1|	445.3	1e-123	PREDICTED: 60S ribosomal protein L10-like [Anolis carolinensis]
Unigene22196_NK	426	4507	497.172	gi|444705585|gb|ELW46991.1|	129	6e-29	40S ribosomal protein S29 [Tupaia chinensis]
CL3352.Contig1_NK	2374	25065	496.153	gi|327262270|ref|XP_003215948.1|	1356.7	0	PREDICTED: heat shock cognate protein HSP 90-beta-like [Anolis carolinensis]
Unigene31464_NK	1844	19426	495.053	gi|16930529|gb|AAL31950.1|	124	4e-87	CDH1-D [Gallus gallus]
Unigene23215_NK	233	2429	489.892	--	--	--	--
Unigene7760_NK	717	7424	486.573	gi|224051739|ref|XP_002200608.1|	407.5	2e-112	PREDICTED: heat shock protein HSP 90-alpha [Taeniopygia guttata]
Unigene21365_NK	1909	19644	483.563	gi|224051518|ref|XP_002200570.1|	561.6	5e-158	PREDICTED: proto-oncogene c-Fos [Taeniopygia guttata]
Unigene13749_NK	539	5521	481.347	gi|78057023|emb|CAJ32313.1|	154.8	1e-36	Metallothionein [Elaphe quatuorlineata]
CL817.Contig1_NK	2442	24953	480.182	gi|123916680|sp|Q4JHE3.1|OXLA_OXYSC	916.8	0	RecName: Full=L-amino-acid oxidase; Short=LAAO; Short=LAO; Flags: Precursor >gi|68304016|gb|AAY89680.1| L-amino acid oxidase precursor [Oxyuranus scutellatus]
CL5594.Contig1_NK	351	3557	476.218	--	--	--	--
Unigene28525_NK	1631	16481	474.852	gi|116242842|sp|P83234.2|VESP_OPHHA	360.5	1e-97	RecName: Full=Ohanin; Flags: Precursor >gi|70907886|gb|AAR07992.2| Ohanin precursor [Ophiophagus hannah] >gi|70927665|gb|AAZ15707.1| Ohanin precursor [Ophiophagus hannah]
CL1832.Contig2_NK	535	5383	472.824	gi|75832160|ref|NP_001028815.1|	57.4	3e-07	complement component (3b/4b) receptor 1-like precursor [Gallus gallus] >gi|71795167|dbj|BAE16762.1| complement regulatory GPI-anchor protein [Gallus gallus]
Unigene31472_NK	1047	10497	471.137	gi|327278514|ref|XP_003224007.1|	595.9	1e-168	PREDICTED: 40S ribosomal protein SA-like [Anolis carolinensis]
Unigene31485_NK	672	6726	470.345	gi|327280722|ref|XP_003225100.1|	363.2	5e-99	PREDICTED: 60S ribosomal protein L18-like [Anolis carolinensis]
CL1983.Contig2_NK	649	6471	468.55	gi|382934454|gb|AFG31701.1|	189.5	1e-46	MHC class II antigen DR beta chain, partial [Saccopteryx bilineata]
Unigene22251_NK	2894	28471	462.31	gi|45382329|ref|NP_990729.1|	325.1	1e-86	translationally-controlled tumor protein homolog [Gallus gallus] >gi|1174624|sp|P43347.1|TCTP_CHICK RecName: Full=Translationally-controlled tumor protein homolog; Short=TCTP; AltName: Full=p23; AltName: Full=pCHK23 >gi|517091|dbj|BAA05374.1| transrationally controlled tumor protein [Gallus gallus] >gi|825782|gb|AAA67296.1| growth-related translationally controlled tumor protein [Gallus gallus]
Unigene31471_NK	870	8484	458.258	gi|465959168|gb|EMP28296.1|	136.3	1e-30	Chelonianin [Chelonia mydas]
CL3932.Contig1_NK	524	5032	451.272	gi|281350307|gb|EFB25891.1|	290	3e-77	hypothetical protein PANDA_004337 [Ailuropoda melanoleuca]
Unigene22263_NK	4365	41442	446.155	gi|327271319|ref|XP_003220435.1|	54.7	1e-20	PREDICTED: UHRF1-binding protein 1-like [Anolis carolinensis]
Unigene26656_NK	1433	13556	444.543	gi|449470945|ref|XP_002194183.2|	632.1	2e-179	PREDICTED: annexin A2 [Taeniopygia guttata]
Unigene8214_NK	736	6954	444.003	gi|291383383|ref|XP_002708285.1|	309.3	1e-82	PREDICTED: ribosomal protein S14-like [Oryctolagus cuniculus]
Unigene20418_NK	523	4912	441.353	gi|327275475|ref|XP_003222499.1|	275.4	8e-73	PREDICTED: 60S ribosomal protein L27-like [Anolis carolinensis]
Unigene25329_NK	324	3036	440.337	--	--	--	--
Unigene920_NK	841	7878	440.199	gi|332817231|ref|XP_003309920.1|	327.8	4e-88	PREDICTED: 60S ribosomal protein L12-like [Pan troglodytes]
Unigene30564_NK	1050	9643	431.57	gi|17384256|emb|CAC83675.1|	54.7	9e-06	mucin 5 [Homo sapiens]
CL196.Contig5_NK	3389	30885	428.257	gi|338855302|gb|AEJ31980.1|	1525.8	0	phosphodiesterase 1 [Crotalus adamanteus]
Unigene27154_NK	1125	10138	423.476	gi|52138713|ref|NP_001004412.1|	288.1	5e-76	neprilysin [Gallus gallus] >gi|38607474|gb|AAR25613.1| neprilysin [Gallus gallus]
Unigene27153_NK	4117	37013	422.476	gi|327266865|ref|XP_003218224.1|	677.9	0	PREDICTED: neprilysin-like [Anolis carolinensis]
CL5013.Contig1_NK	494	4406	419.128	gi|126309232|ref|XP_001366082.1|	89	9e-17	PREDICTED: profilin-1-like isoform 1 [Monodelphis domestica] >gi|334323308|ref|XP_003340377.1| PREDICTED: profilin-1-like isoform 2 [Monodelphis domestica]
Unigene6848_NK	739	6591	419.118	gi|13385036|ref|NP_079862.1|	427.9	2e-118	60S ribosomal protein L15 [Mus musculus] >gi|15431293|ref|NP_002939.2| 60S ribosomal protein L15 isoform 1 [Homo sapiens] >gi|20806169|ref|NP_620814.1| 60S ribosomal protein L15 [Rattus norvegicus] >gi|118150852|ref|NP_001071334.1| 60S ribosomal protein L15 [Bos taurus] >gi|197102206|ref|NP_001127692.1| 60S ribosomal protein L15 [Pongo abelii] >gi|302148496|ref|NP_001180490.1| ribosomal protein L…
CL5644.Contig2_NK	2213	19225	408.238	gi|465990854|gb|EMP38506.1|	815.5	0	Elongation factor 1-gamma [Chelonia mydas]
Unigene6711_NK	1859	16114	407.336	gi|45383890|ref|NP_989441.1|	838.6	0	protein disulfide-isomerase A3 precursor [Gallus gallus] >gi|82243463|sp|Q8JG64.1|PDIA3_CHICK RecName: Full=Protein disulfide-isomerase A3; AltName: Full=Endoplasmic reticulum resident protein 57; Short=ER protein 57; Short=ERp57; AltName: Full=Glucose-regulated thiol oxidoreductase 58 kDa protein; Flags: Precursor >gi|22651801|gb|AAM82759.1| glucose regulated thiol oxidoreductase protein precurs…
Unigene25179_NK	1616	13950	405.66	gi|18000293|gb|AAL54908.1|AF165225_1	1094.7	0	eukaryotic translation inititation factor 4B [Lapemis hardwickii]
Unigene31475_NK	1069	9071	398.755	gi|327270707|ref|XP_003220130.1|	594	4e-168	PREDICTED: 60S ribosomal protein L5-like [Anolis carolinensis]
Unigene31469_NK	849	7176	397.195	gi|327266268|ref|XP_003217928.1|	402.5	1e-110	PREDICTED: 40S ribosomal protein S5-like [Anolis carolinensis]
CL1336.Contig3_NK	775	6520	395.344	gi|301605491|ref|XP_002932355.1|	54.7	5e-06	PREDICTED: hypothetical protein LOC100494796 [Xenopus (Silurana) tropicalis]
Unigene31473_NK	1702	14293	394.632	gi|18000297|gb|AAL54910.1|	593.2	1e-167	unknown [Lapemis hardwickii]
Unigene30364_NK	376	3153	394.062	gi|449486227|ref|XP_002193143.2|	174.5	1e-42	PREDICTED: minor histocompatibility antigen H13 [Taeniopygia guttata]
Unigene30763_NK	897	7435	389.509	gi|327278842|ref|XP_003224169.1|	364.8	3e-99	PREDICTED: ferritin heavy chain-like [Anolis carolinensis]
Unigene1006_NK	1168	9583	385.556	--	--	--	--
CL4462.Contig2_NK	1451	11851	383.81	gi|225706552|gb|ACO09122.1|	280.4	1e-73	Cofilin-2 [Osmerus mordax]
Unigene347_NK	1050	8478	379.431	gi|327269296|ref|XP_003219430.1|	255.8	2e-66	PREDICTED: GTPase IMAP family member 4-like [Anolis carolinensis]
Unigene14243_NK	2744	21942	375.769	gi|327264864|ref|XP_003217231.1|	1395.2	0	PREDICTED: SEC14-like protein 1-like [Anolis carolinensis]
Unigene31479_NK	625	4985	374.812	gi|60334810|gb|AAH90618.1|	293.9	3e-78	Rps16 protein [Mus musculus]
Unigene28662_NK	388	3086	373.76	--	--	--	--
Unigene31509_NK	297	2351	371.985	gi|52078478|gb|AAU25919.1|	130.2	3e-29	G protein-binding protein [Oxyuranus scutellatus scutellatus]
Unigene31493_NK	725	5726	371.144	gi|327282332|ref|XP_003225897.1|	382.5	1e-104	PREDICTED: 40S ribosomal protein S9-like [Anolis carolinensis]
Unigene6550_NK	865	6823	370.671	gi|327268441|ref|XP_003219006.1|	524.2	3e-147	PREDICTED: 60S ribosomal protein L8-like [Anolis carolinensis]
CL1222.Contig2_NK	302	2378	370.027	--	--	--	--
Unigene30573_NK	994	7667	362.467	--	--	--	--
Unigene31457_NK	1590	12203	360.66	gi|327280822|ref|XP_003225150.1|	485.7	2e-135	PREDICTED: 60S ribosomal protein L6-like [Anolis carolinensis]
Unigene6577_NK	693	5281	358.106	gi|197129473|gb|ACH45971.1|	58.5	9e-63	putative ornithine decarboxylase antizyme variant 1 [Taeniopygia guttata]
Unigene25658_NK	889	6771	357.915	gi|338817703|sp|B6D434.1|CAMP_BUNFA	161.4	5e-38	RecName: Full=Cathelicidin-BF antimicrobial peptide; AltName: Full=Cathelicidin-related protein; Flags: Precursor >gi|193792527|gb|ACF21001.1| cathelicidin-related protein precursor [Bungarus fasciatus] >gi|206944351|gb|ACI22652.1| cathelicidin-BF [Bungarus fasciatus]
Unigene31487_NK	862	6525	355.715	gi|327281161|ref|XP_003225318.1|	313.5	8e-84	PREDICTED: ferritin light chain, oocyte isoform-like [Anolis carolinensis]
Unigene31492_NK	1135	8539	353.541	gi|327273845|ref|XP_003221690.1|	349	2e-94	PREDICTED: signal peptidase complex subunit 3-like [Anolis carolinensis]
Unigene31480_NK	1839	13791	352.406	gi|327288752|ref|XP_003229089.1|	828.5	0	PREDICTED: d-3-phosphoglycerate dehydrogenase-like [Anolis carolinensis]
Unigene504_NK	2961	22147	351.484	gi|327280272|ref|XP_003224876.1|	608.6	6e-172	PREDICTED: tumor necrosis factor receptor superfamily member 11B-like [Anolis carolinensis]
Unigene14241_NK	332	2474	350.179	gi|403275765|ref|XP_003945197.1|	193	3e-48	PREDICTED: LOW QUALITY PROTEIN: 60S ribosomal protein L34 [Saimiri boliviensis boliviensis]
Unigene6585_NK	993	7294	345.18	--	--	--	--
Unigene13519_NK	1387	10115	342.703	gi|34555782|gb|AAN05099.1|	620.5	6e-176	lactate dehydrogenase B [Iguana iguana]
Unigene610_NK	1633	11908	342.674	gi|395729727|ref|XP_002810115.2|	174.1	1e-41	PREDICTED: LOW QUALITY PROTEIN: mucin-1 isoform 1 [Pongo abelii]
CL2497.Contig1_NK	568	4095	338.793	gi|56118966|ref|NP_001007968.1|	229.9	4e-59	60S ribosomal protein L30 [Gallus gallus] >gi|54039169|sp|P67883.2|RL30_CHICK RecName: Full=60S ribosomal protein L30 >gi|54039170|sp|P67884.2|RL30_OPHHA RecName: Full=60S ribosomal protein L30 >gi|10442706|gb|AAG17442.1|AF297033_1 ribosomal protein L30 [Ophiophagus hannah] >gi|402507|dbj|BAA03394.1| ribosomal protein L30 [Gallus gallus] >gi|86355135|dbj|BAE78802.1| ribosomal protein L30 [Pelodis…
Unigene31486_NK	476	3374	333.094	gi|126344552|ref|XP_001378524.1|	161.8	9e-39	PREDICTED: hypothetical protein LOC100028506 [Monodelphis domestica]
CL617.Contig1_NK	952	6731	332.255	--	--	--	--
Unigene6741_NK	254	1789	330.983	--	--	--	--
Unigene6573_NK	2301	15912	324.965	gi|57525168|ref|NP_001006186.1|	392.1	7e-107	transmembrane emp24 domain-containing protein 2 precursor [Gallus gallus]
Unigene23192_NK	3030	20798	322.558	gi|465967289|gb|EMP31293.1|	674.1	0	Thioredoxin-interacting protein [Chelonia mydas]
Unigene14094_NK	1226	8403	322.087	--	--	--	--
Unigene21923_NK	626	4286	321.741	gi|47604951|ref|NP_990284.1|	322.8	7e-87	ubiquitin-40S ribosomal protein S27a [Gallus gallus] >gi|302393814|sp|P79781.3|RS27A_CHICK RecName: Full=Ubiquitin-40S ribosomal protein S27a; AltName: Full=Ubiquitin carboxyl extension protein 80; Contains: RecName: Full=Ubiquitin; Contains: RecName: Full=40S ribosomal protein S27a; Flags: Precursor >gi|1763015|gb|AAC60279.1| ubiquitin/ribosomal protein [Gallus gallus] >gi|300676798|gb|ADK26674.…
CL3748.Contig2_NK	1999	13523	317.899	gi|327265958|ref|XP_003217774.1|	926.8	0	PREDICTED: protein transport protein Sec61 subunit alpha isoform 1-like [Anolis carolinensis]
Unigene31497_NK	1189	7963	314.72	gi|327276853|ref|XP_003223181.1|	547.7	4e-154	PREDICTED: eukaryotic translation initiation factor 3 subunit F-like [Anolis carolinensis]
Unigene1067_NK	770	5141	313.752	gi|327272706|ref|XP_003221125.1|	171.8	3e-41	PREDICTED: matrix Gla protein-like [Anolis carolinensis]
Unigene31503_NK	978	6459	310.353	gi|449272455|gb|EMC82372.1|	354.4	5e-96	Myosin regulatory light chain 2, smooth muscle minor isoform, partial [Columba livia]
Unigene22672_NK	1600	10358	304.218	gi|327281598|ref|XP_003225534.1|	203.8	2e-50	PREDICTED: prothymosin alpha-like [Anolis carolinensis]
Unigene14109_NK	394	2550	304.139	--	--	--	--
Unigene31515_NK	356	2295	302.943	--	--	--	--
CL1336.Contig4_NK	797	5114	301.531	gi|301605491|ref|XP_002932355.1|	65.9	2e-09	PREDICTED: hypothetical protein LOC100494796 [Xenopus (Silurana) tropicalis]
Unigene91_NK	3264	20934	301.392	gi|163915111|ref|NP_001106542.1|	314.7	2e-83	ZFP36 ring finger protein [Xenopus (Silurana) tropicalis] >gi|159155749|gb|AAI54919.1| zfp36 protein [Xenopus (Silurana) tropicalis]
Unigene6583_NK	776	4973	301.152	gi|134048900|dbj|BAF49516.1|	316.6	7e-85	preproopiomelanocortin [Boiga irregularis]
Unigene31489_NK	1165	7462	300.994	gi|148678309|gb|EDL10256.1|	174.9	7e-42	mCG132689 [Mus musculus]
Unigene21555_NK	262	1669	299.353	--	--	--	--
CL5605.Contig1_NK	1573	9998	298.685	gi|32469675|sp|P82942.1|VM3K_NAJKA	194.1	1e-47	RecName: Full=Hemorrhagic metalloproteinase-disintegrin kaouthiagin; AltName: Full=Snake venom metalloproteinase; Short=SVMP
CL483.Contig3_NK	208	1306	295.059	gi|340384387|ref|XP_003390694.1|	70.9	2e-11	PREDICTED: uncharacterized protein K02A2.6-like, partial [Amphimedon queenslandica]
CL4096.Contig2_NK	1230	7641	291.927	gi|327265494|ref|XP_003217543.1|	205.3	5e-51	PREDICTED: HLA class II histocompatibility antigen gamma chain-like [Anolis carolinensis]
Unigene3_NK	2153	13338	291.122	gi|4378025|gb|AAD19348.1|	31.6	8e-113	reverse transcriptase-like protein [Takifugu rubripes]
CL2771.Contig2_NK	1717	10587	289.755	gi|348580683|ref|XP_003476108.1|	25.4	0	PREDICTED: tubulin alpha-1B chain-like [Cavia porcellus]
Unigene451_NK	1596	9778	287.903	gi|354496917|ref|XP_003510570.1|	298.1	8e-79	PREDICTED: calmodulin-like [Cricetulus griseus]
Unigene6575_NK	1605	9779	286.318	gi|327269807|ref|XP_003219684.1|	721.5	0	PREDICTED: translocating chain-associated membrane protein 1-like 1-like isoform 1 [Anolis carolinensis]
CL155.Contig1_NK	1988	11873	280.655	gi|327266658|ref|XP_003218121.1|	401.4	9e-110	PREDICTED: zinc finger protein RFP-like [Anolis carolinensis]
Unigene31488_NK	1991	11871	280.185	gi|327261224|ref|XP_003215431.1|	481.5	7e-134	PREDICTED: 14-3-3 protein theta-like [Anolis carolinensis]
Unigene29112_NK	450	2669	278.718	--	--	--	--
CL859.Contig2_NK	466	2758	278.123	gi|82794006|ref|XP_728268.1|	57.4	2e-07	hypothetical protein [Plasmodium yoelii yoelii 17XNL] >gi|23484531|gb|EAA19833.1| hypothetical protein [Plasmodium yoelii yoelii]
Unigene25175_NK	679	4015	277.872	gi|18000293|gb|AAL54908.1|AF165225_1	151.8	2e-35	eukaryotic translation inititation factor 4B [Lapemis hardwickii]
CL202.Contig3_NK	2042	11868	273.118	gi|363741664|ref|XP_003642537.1|	520.8	1e-145	PREDICTED: minor histocompatibility antigen H13 isoform 1 [Gallus gallus]
Unigene23216_NK	5843	33868	272.385	gi|327267143|ref|XP_003218362.1|	2400.9	0	PREDICTED: vigilin-like [Anolis carolinensis]
Unigene24916_NK	720	4170	272.165	gi|327278629|ref|XP_003224063.1|	116.7	1e-24	PREDICTED: 6-phosphofructo-2-kinase/fructose-2,6-biphosphatase 2-like [Anolis carolinensis]
CL3939.Contig10_NK	1578	9137	272.098	gi|188501739|gb|ACD54838.1|	430.6	1e-118	MHC class I antigen [Iguana iguana]
CL3939.Contig3_NK	326	1877	270.567	gi|213383|gb|AAA49389.1|	161.4	1e-38	MHC class I protein, partial [Nerodia sipedon]
Unigene380_NK	1326	7613	269.8	gi|327269294|ref|XP_003219429.1|	242.3	4e-62	PREDICTED: GTPase IMAP family member 2-like [Anolis carolinensis]
Unigene30725_NK	521	2967	267.614	--	--	--	--
Unigene31491_NK	962	5464	266.91	gi|465978233|gb|EMP34974.1|	421	4e-116	Sn1-specific diacylglycerol lipase beta [Chelonia mydas]
CL1065.Contig1_NK	578	3282	266.833	--	--	--	--
Unigene31482_NK	933	5297	266.795	gi|327264882|ref|XP_003217239.1|	310.8	6e-83	PREDICTED: 60S ribosomal protein L27a-like [Anolis carolinensis]
Unigene706_NK	3016	17089	266.265	gi|327261299|ref|XP_003215468.1|	833.6	0	PREDICTED: protein disulfide-isomerase A6-like [Anolis carolinensis]
Unigene6576_NK	925	5239	266.156	gi|465993400|gb|EMP39229.1|	304.7	4e-81	Dr1-associated corepressor [Chelonia mydas]
Unigene25685_NK	784	4419	264.873	gi|327286244|ref|XP_003227841.1|	394.8	2e-108	PREDICTED: integral membrane protein 2A-like [Anolis carolinensis]
Unigene25671_NK	2077	11625	263.018	gi|327263321|ref|XP_003216468.1|	481.5	7e-134	PREDICTED: solute carrier family 12 member 2-like [Anolis carolinensis]
Unigene30698_NK	678	3793	262.895	--	--	--	--
Unigene26867_NK	988	5507	261.931	gi|326933506|ref|XP_003212844.1|	346.7	1e-93	PREDICTED: translocon-associated protein subunit beta-like [Meleagris gallopavo]
Unigene8404_NK	1312	7298	261.396	gi|327265631|ref|XP_003217611.1|	322	4e-86	PREDICTED: mesencephalic astrocyte-derived neurotrophic factor-like [Anolis carolinensis]
Unigene6578_NK	530	2877	255.09	gi|9295421|gb|AAF86963.1|	131.3	1e-29	ornithine decarboxylase antizyme [Trachemys scripta elegans]
Unigene21363_NK	436	2361	254.471	--	--	--	--
Unigene31490_NK	1277	6911	254.319	gi|327290360|ref|XP_003229891.1|	346.3	2e-93	PREDICTED: transmembrane emp24 domain-containing protein 10-like [Anolis carolinensis]
Unigene6551_NK	1237	6679	253.729	--	--	--	--
Unigene84_NK	356	1919	253.311	--	--	--	--
CL96.Contig2_NK	915	4834	248.264	--	--	--	--
CL1587.Contig1_NK	700	3647	244.831	--	--	--	--
Unigene21814_NK	557	2894	244.159	gi|291399250|ref|XP_002716020.1|	53.1	8e-06	PREDICTED: serine/arginine repetitive matrix 1 isoform 3 [Oryctolagus cuniculus]
Unigene14278_NK	633	3288	244.094	gi|27777661|ref|NP_776251.1|	227.6	3e-58	keratinocyte-associated protein 2 [Homo sapiens] >gi|74751060|sp|Q8N6L1.1|KTAP2_HUMAN RecName: Full=Keratinocyte-associated protein 2; Short=KCP-2 >gi|20987525|gb|AAH29806.1| Keratinocyte associated protein 2 [Homo sapiens]
Unigene6555_NK	1181	6094	242.483	gi|327286771|ref|XP_003228103.1|	465.7	2e-129	PREDICTED: chloride intracellular channel protein 1-like [Anolis carolinensis]
Unigene24733_NK	1615	8282	240.986	gi|440907218|gb|ELR57388.1|	85.9	5e-48	Craniofacial development protein 2 [Bos grunniens mutus]
CL483.Contig1_NK	4196	21367	239.297	gi|301619422|ref|XP_002939094.1|	1176	0	PREDICTED: uncharacterized protein K02A2.6-like [Xenopus (Silurana) tropicalis]
Unigene23452_NK	690	3464	235.916	--	--	--	--
Unigene21556_NK	2227	11116	234.562	--	--	--	--
Unigene24714_NK	649	3236	234.311	gi|327276238|ref|XP_003222877.1|	218	2e-55	PREDICTED: heat shock cognate 71 kDa protein-like [Anolis carolinensis]
CL167.Contig2_NK	571	2846	234.222	gi|327271319|ref|XP_003220435.1|	97.8	3e-19	PREDICTED: UHRF1-binding protein 1-like [Anolis carolinensis]
Unigene733_NK	1734	8616	233.499	gi|270015547|gb|EFA11995.1|	45.8	7e-38	hypothetical protein TcasGA2_TC005145 [Tribolium castaneum]
Unigene31425_NK	2215	10845	230.083	gi|363730908|ref|XP_419144.3|	752.3	0	PREDICTED: structural maintenance of chromosomes flexible hinge domain-containing protein 1 [Gallus gallus]
Unigene25669_NK	3744	18207	228.524	gi|327263321|ref|XP_003216468.1|	1554.7	0	PREDICTED: solute carrier family 12 member 2-like [Anolis carolinensis]
Unigene13798_NK	1358	6589	228.007	gi|465977985|gb|EMP34930.1|	363.6	1e-98	hypothetical protein UY3_07964 [Chelonia mydas]
Unigene6561_NK	420	2015	225.452	gi|327282622|ref|XP_003226041.1|	100.1	3e-20	PREDICTED: 60S acidic ribosomal protein P0-like [Anolis carolinensis]
Unigene22502_NK	332	1589	224.913	--	--	--	--
Unigene14079_NK	1602	7666	224.872	gi|163965364|ref|NP_001106673.1|	406.4	2e-111	nascent polypeptide-associated complex subunit alpha isoform b [Homo sapiens] >gi|356582415|ref|NP_001239186.1| nascent polypeptide-associated complex subunit alpha [Canis lupus familiaris] >gi|356582418|ref|NP_001239187.1| nascent polypeptide-associated complex subunit alpha [Canis lupus familiaris] >gi|71151996|sp|Q13765.1|NACA_HUMAN RecName: Full=Nascent polypeptide-associated complex subunit …
Unigene24402_NK	1696	8107	224.628	gi|327265677|ref|XP_003217634.1|	413.7	1e-113	PREDICTED: transmembrane emp24 domain-containing protein 9-like [Anolis carolinensis]
Unigene31483_NK	1820	8597	221.975	gi|224098392|ref|XP_002199511.1|	766.5	0	PREDICTED: phosphoglycerate kinase-like [Taeniopygia guttata]
Unigene30560_NK	1028	4828	220.7	--	--	--	--
Unigene31484_NK	1469	6899	220.695	gi|326928964|ref|XP_003210642.1|	700.3	0	PREDICTED: actin-related protein 2/3 complex subunit 1B-like [Meleagris gallopavo]
Unigene31504_NK	835	3892	219.036	gi|327273497|ref|XP_003221517.1|	196.1	1e-48	PREDICTED: uncharacterized protein C4orf34 homolog [Anolis carolinensis]
CL50.Contig1_NK	1650	7656	218.045	gi|327276238|ref|XP_003222877.1|	989.2	0	PREDICTED: heat shock cognate 71 kDa protein-like [Anolis carolinensis]
CL2322.Contig2_NK	410	1900	217.77	--	--	--	--
Unigene31227_NK	359	1652	216.244	gi|258677360|gb|ACV87423.1|	155.6	6e-37	MHC class Ia chain [Polyodon spathula]
Unigene21253_NK	1219	5522	212.874	gi|82077272|sp|Q5R2J2.1|G3P_TRISI	627.1	5e-178	RecName: Full=Glyceraldehyde-3-phosphate dehydrogenase; Short=GAPDH; AltName: Full=Peptidyl-cysteine S-nitrosylase GAPDH >gi|56377786|dbj|BAD74117.1| glyceraldehyde-3-phosphate dehydrogenase (GAPDH) homologue [Pelodiscus sinensis]
Unigene28663_NK	2227	9971	210.401	gi|327285737|ref|XP_003227589.1|	73.2	6e-11	PREDICTED: annexin A11-like [Anolis carolinensis]
CL4096.Contig1_NK	1419	6341	209.993	gi|78155535|gb|ABB22797.1|	235	7e-60	MHC class II-associated invariant chain CD74 [Caiman crocodilus]
Unigene30727_NK	1018	4549	209.989	--	--	--	--
Unigene31510_NK	618	2754	209.413	gi|327282644|ref|XP_003226052.1|	151.8	2e-35	PREDICTED: cytochrome c oxidase subunit 6A1, mitochondrial-like [Anolis carolinensis]
Unigene22929_NK	1242	5504	208.25	gi|395512309|ref|XP_003760383.1|	622.1	1e-176	PREDICTED: eukaryotic translation initiation factor 3 subunit H-like [Sarcophilus harrisii]
Unigene31501_NK	895	3962	208.027	gi|296194360|ref|XP_002744918.1|	321.2	4e-86	PREDICTED: transcription factor BTF3-like [Callithrix jacchus]
Unigene28208_NK	3198	14144	207.837	gi|426250598|ref|XP_004019022.1|	1332.8	0	PREDICTED: ATP-binding cassette sub-family F member 1 isoform 1 [Ovis aries]
Unigene31507_NK	1482	6485	205.632	gi|471360356|ref|XP_004370748.1|	830.1	0	PREDICTED: eukaryotic translation initiation factor 3 subunit E [Trichechus manatus latirostris]
Unigene14407_NK	824	3597	205.136	gi|327273843|ref|XP_003221689.1|	357.5	4e-97	PREDICTED: vascular endothelial growth factor C-like [Anolis carolinensis]
Unigene6586_NK	528	2272	202.21	gi|432944299|ref|XP_004083396.1|	75.5	1e-12	PREDICTED: dolichyl-diphosphooligosaccharide--protein glycosyltransferase subunit 4-like [Oryzias latipes]
Unigene6556_NK	1293	5535	201.163	gi|327289640|ref|XP_003229532.1|	289.7	2e-76	PREDICTED: adenine phosphoribosyltransferase-like [Anolis carolinensis]
Unigene31506_NK	850	3626	200.465	gi|327266746|ref|XP_003218165.1|	376.3	9e-103	PREDICTED: MKI67 FHA domain-interacting nucleolar phosphoprotein-like [Anolis carolinensis]
Unigene28460_NK	398	1691	199.659	gi|47211727|emb|CAF92525.1|	52.4	8e-06	unnamed protein product [Tetraodon nigroviridis]
Unigene14253_NK	1941	8221	199.034	gi|291398041|ref|XP_002715636.1|	216.9	3e-54	PREDICTED: extracellular matrix protein 1 isoform 2 [Oryctolagus cuniculus]
CL2051.Contig3_NK	279	1181	198.918	gi|145982754|gb|ABQ01132.1|	147.5	1e-34	carinatease-1 [Tropidechis carinatus]
Unigene266_NK	3513	14841	198.524	gi|390340458|ref|XP_003725249.1|	145.6	1e-32	PREDICTED: uncharacterized protein LOC100892840 [Strongylocentrotus purpuratus]
Unigene24449_NK	1540	6469	197.399	gi|327289788|ref|XP_003229606.1|	601.3	4e-170	PREDICTED: clusterin-like, partial [Anolis carolinensis]
Unigene23279_NK	2117	8886	197.249	gi|327268021|ref|XP_003218797.1|	466.5	2e-129	PREDICTED: lysosome-associated membrane glycoprotein 1-like [Anolis carolinensis]
Unigene31495_NK	610	2555	196.829	gi|359339009|ref|NP_001240705.1|	115.2	2e-24	NADH dehydrogenase [ubiquinone] 1 alpha subcomplex subunit 4 [Callithrix jacchus]
Unigene31499_NK	468	1959	196.706	gi|224081582|ref|XP_002192630.1|	169.9	3e-41	PREDICTED: ATPase inhibitor, mitochondrial [Taeniopygia guttata]
Unigene23130_NK	2471	10329	196.433	gi|465955740|gb|EMP26584.1|	284.6	1e-74	Tapasin [Chelonia mydas]
Unigene23657_NK	1370	5717	196.1	--	--	--	--
Unigene792_NK	311	1291	195.072	gi|301622748|ref|XP_002940691.1|	80.5	2e-14	PREDICTED: hypothetical protein LOC100485130 [Xenopus (Silurana) tropicalis]
Unigene23448_NK	323	1338	194.663	--	--	--	--
CL1347.Contig1_NK	1706	7051	194.223	gi|327292242|ref|XP_003230829.1|	224.9	1e-56	PREDICTED: GTPase IMAP family member 4-like, partial [Anolis carolinensis]
CL1438.Contig2_NK	1848	7634	194.124	gi|327285596|ref|XP_003227519.1|	430.6	1e-118	PREDICTED: signal peptidase complex subunit 2-like [Anolis carolinensis]
Unigene31481_NK	1793	7397	193.867	gi|354481494|ref|XP_003502936.1|	137.5	2e-30	PREDICTED: stress-associated endoplasmic reticulum protein 1-like, partial [Cricetulus griseus]
Unigene24403_NK	1938	7995	193.862	--	--	--	--
Unigene31494_NK	1534	6322	193.668	gi|84370041|ref|NP_001033596.1|	487.6	7e-136	glioma tumor suppressor candidate region gene 2 protein [Bos taurus] >gi|83638565|gb|AAI09970.1| Glioma tumor suppressor candidate region gene 2 [Bos taurus] >gi|296477440|tpg|DAA19555.1| TPA: glioma tumor suppressor candidate region gene 2 [Bos taurus]
CL3457.Contig2_NK	852	3501	193.1	gi|432105586|gb|ELK31780.1|	290.4	7e-77	Claudin-7 [Myotis davidii]
Unigene25177_NK	1374	5643	192.998	--	--	--	--
Unigene13902_NK	328	1347	192.985	--	--	--	--
Unigene13977_NK	546	2241	192.876	gi|345324604|ref|XP_001509053.2|	102.8	8e-21	PREDICTED: interferon alpha-inducible protein 27-like protein 2-like [Ornithorhynchus anatinus]
Unigene30123_NK	356	1450	191.402	--	--	--	--
Unigene6806_NK	513	2084	190.901	gi|327272446|ref|XP_003220996.1|	191.4	1e-47	PREDICTED: galectin-1-like [Anolis carolinensis]
Unigene31498_NK	877	3515	188.345	gi|327290350|ref|XP_003229886.1|	343.6	7e-93	PREDICTED: protein DJ-1-like [Anolis carolinensis]
Unigene13598_NK	2024	8098	188.017	gi|432110945|gb|ELK34419.1|	303.9	2e-80	Phosphatidylinositol-4-phosphate 3-kinase C2 domain-containing subunit alpha [Myotis davidii]
Unigene13809_NK	1482	5884	186.575	gi|327277992|ref|XP_003223747.1|	367.9	8e-100	PREDICTED: nucleolar RNA helicase 2-like [Anolis carolinensis]
Unigene13810_NK	1532	6080	186.498	gi|118092587|ref|XP_001232052.1|	689.1	0	PREDICTED: nucleolar RNA helicase 2 [Gallus gallus]
Unigene31511_NK	840	3332	186.404	gi|348520592|ref|XP_003447811.1|	104.4	7e-21	PREDICTED: interferon alpha-inducible protein 27, mitochondrial-like [Oreochromis niloticus]
Unigene13923_NK	3454	13670	185.984	gi|312837062|ref|NP_001186126.1|	578.2	1e-162	elongation of very long chain fatty acids protein 5 [Gallus gallus] >gi|308212481|gb|ADO21498.1| elongation of very long chain fatty acids family member protein 5 [Gallus gallus]
Unigene29293_NK	322	1257	183.446	--	--	--	--
Unigene6750_NK	996	3880	183.063	gi|134085761|ref|NP_001076835.1|	302.4	2e-80	F11 receptor precursor [Gallus gallus] >gi|118500415|gb|ABK97409.1| junctional adhesion protein A [Gallus gallus]
Unigene6549_NK	2756	10733	183.008	gi|327288158|ref|XP_003228795.1|	763.8	0	PREDICTED: glutamine synthetase-like, partial [Anolis carolinensis]
Unigene827_NK	553	2131	181.087	gi|167521489|ref|XP_001745083.1|	54.3	3e-06	hypothetical protein [Monosiga brevicollis MX1] >gi|163776697|gb|EDQ90316.1| predicted protein [Monosiga brevicollis MX1]
Unigene31502_NK	2573	9892	180.665	gi|327282056|ref|XP_003225760.1|	1420.6	0	PREDICTED: dolichyl-diphosphooligosaccharide--protein glycosyltransferase subunit STT3A-like [Anolis carolinensis]
Unigene30411_NK	2725	10473	180.607	gi|327290579|ref|XP_003230000.1|	413.7	2e-113	PREDICTED: homocysteine-responsive endoplasmic reticulum-resident ubiquitin-like domain member 1 protein-like, partial [Anolis carolinensis]
CL2293.Contig1_NK	247	947	180.17	--	--	--	--
Unigene21220_NK	287	1096	179.456	--	--	--	--
Unigene31523_NK	482	1839	179.293	gi|295792306|gb|ADG29157.1|	114.8	1e-24	mitochondrial ATP synthase subunit f [Epinephelus coioides]
Unigene31522_NK	668	2548	179.247	gi|18000273|gb|AAL54898.1|AF159543_1	196.8	6e-49	transport protein Sec61 beta subunit [Lapemis hardwickii]
Unigene27182_NK	275	1046	178.743	--	--	--	--
Unigene6546_NK	578	2192	178.214	--	--	--	--
Unigene21760_NK	1545	5798	176.351	gi|327265075|ref|XP_003217334.1|	289.7	3e-76	PREDICTED: nucleoside diphosphate kinase-like [Anolis carolinensis]
Unigene6545_NK	2155	8041	175.344	gi|327264451|ref|XP_003217027.1|	471.9	6e-131	PREDICTED: aquaporin-5-like [Anolis carolinensis] >gi|327291067|ref|XP_003230243.1| PREDICTED: aquaporin-5-like [Anolis carolinensis]
Unigene26461_NK	3948	14606	173.853	gi|327285566|ref|XP_003227504.1|	766.9	0	PREDICTED: protein FAM46A-like [Anolis carolinensis]
Unigene29817_NK	3469	12828	173.774	gi|45382795|ref|NP_990827.1|	2086.2	0	Golgi apparatus protein 1 precursor [Gallus gallus] >gi|17376684|sp|Q02391.1|GSLG1_CHICK RecName: Full=Golgi apparatus protein 1; AltName: Full=Cysteine-rich fibroblast growth factor receptor; Flags: Precursor >gi|211776|gb|AAA48769.1| cysteine-rich fibroblast growth factor receptor [Gallus gallus]
Unigene13804_NK	963	3536	172.55	gi|466003435|gb|EMP42095.1|	315.5	2e-84	Complement C1q subcomponent subunit C [Chelonia mydas]
Unigene25670_NK	1043	3816	171.93	--	--	--	--
Unigene6572_NK	3532	12875	171.299	gi|327267458|ref|XP_003218519.1|	816.6	0	PREDICTED: proactivator polypeptide-like [Anolis carolinensis]
Unigene13872_NK	531	1932	170.978	gi|109255000|gb|ABG26998.1|	154.1	2e-36	B-cell translocation gene 1 protein [Sistrurus catenatus edwardsi]
Unigene13835_NK	992	3604	170.727	gi|327270253|ref|XP_003219904.1|	394	5e-108	PREDICTED: peroxiredoxin-6-like [Anolis carolinensis]
Unigene31517_NK	1775	6442	170.55	gi|327274440|ref|XP_003221985.1|	999.6	0	PREDICTED: nucleolar GTP-binding protein 1-like [Anolis carolinensis]
Unigene13937_NK	1460	5287	170.171	--	--	--	--
Unigene21815_NK	568	2053	169.851	gi|345781394|ref|XP_003432129.1|	70.5	5e-11	PREDICTED: transmembrane protein 176B isoform 1 [Canis lupus familiaris]
Unigene29884_NK	320	1152	169.173	--	--	--	--
Unigene13982_NK	2432	8727	168.628	gi|5803225|ref|NP_006752.1|	500.4	1e-139	14-3-3 protein epsilon [Homo sapiens] >gi|27806197|ref|NP_776916.1| 14-3-3 protein epsilon [Bos taurus] >gi|55741616|ref|NP_001006219.1| 14-3-3 protein epsilon [Gallus gallus] >gi|226874906|ref|NP_033562.3| 14-3-3 protein epsilon [Mus musculus] >gi|350539099|ref|NP_001233297.1| 14-3-3 protein epsilon [Pan troglodytes] >gi|51702210|sp|P62258.1|1433E_HUMAN RecName: Full=14-3-3 protein epsilon; Shor…
Unigene29883_NK	968	3459	167.921	--	--	--	--
Unigene6842_NK	915	3261	167.478	gi|354505773|ref|XP_003514942.1|	159.5	2e-37	PREDICTED: group XVI phospholipase A2-like [Cricetulus griseus]
Unigene31556_NK	332	1180	167.022	gi|350537261|ref|NP_001233184.1|	93.6	3e-18	cytochrome c oxidase subunit 7C, mitochondrial [Taeniopygia guttata]
Unigene26_NK	559	1982	166.618	gi|4378025|gb|AAD19348.1|	110.2	5e-23	reverse transcriptase-like protein [Takifugu rubripes]
CL2771.Contig3_NK	672	2381	166.502	gi|327260426|ref|XP_003215035.1|	455.7	8e-127	PREDICTED: tubulin alpha-4A chain-like [Anolis carolinensis]
Unigene31536_NK	568	2000	165.467	--	--	--	--
Unigene31514_NK	528	1855	165.097	--	--	--	--
Unigene28382_NK	1374	4826	165.055	gi|327265727|ref|XP_003217659.1|	595.1	2e-168	PREDICTED: RNA-binding protein 5-like [Anolis carolinensis]
Unigene31519_NK	513	1801	164.978	gi|471355887|ref|XP_004368546.1|	123.6	3e-27	PREDICTED: translation machinery-associated protein 7 [Trichechus manatus latirostris]
Unigene6558_NK	979	3412	163.778	gi|327288737|ref|XP_003229082.1|	334	7e-90	PREDICTED: ubiquitin-fold modifier-conjugating enzyme 1-like [Anolis carolinensis]
Unigene31508_NK	757	2633	163.45	gi|237820703|ref|NP_001013554.2|	246.9	7e-64	receptor accessory protein 6-like [Danio rerio]
Unigene27034_NK	1886	6541	162.979	gi|327279530|ref|XP_003224509.1|	305.1	8e-81	PREDICTED: cold-inducible RNA-binding protein-like [Anolis carolinensis]
CL5404.Contig2_NK	1117	3872	162.896	gi|57524801|ref|NP_001005827.1|	427.2	7e-118	ras-related protein Rab-11A [Gallus gallus] >gi|82233797|sp|Q5ZJN2.1|RB11A_CHICK RecName: Full=Ras-related protein Rab-11A; Flags: Precursor
Unigene6628_NK	579	1996	161.999	gi|238928312|gb|ACR78475.1|	347.8	1e-94	putative GILT [Drysdalia coronoides]
Unigene21854_NK	2138	7369	161.968	gi|327265428|ref|XP_003217510.1|	1104.7	0	PREDICTED: calnexin-like [Anolis carolinensis]
Unigene30746_NK	362	1245	161.618	--	--	--	--
Unigene21891_NK	2135	7328	161.293	gi|327272356|ref|XP_003220951.1|	1225.7	0	PREDICTED: endoplasmin-like [Anolis carolinensis]
Unigene27919_NK	398	1361	160.696	--	--	--	--
CL3166.Contig1_NK	1458	4974	160.316	gi|327272509|ref|XP_003221027.1|	798.9	0	PREDICTED: 60S ribosomal protein L3-like [Anolis carolinensis]
CL2043.Contig1_NK	349	1187	159.828	--	--	--	--
Unigene21816_NK	2849	9680	159.666	gi|327271291|ref|XP_003220421.1|	314.3	2e-83	PREDICTED: protein BTG2-like [Anolis carolinensis]
CL1222.Contig1_NK	302	1022	159.028	--	--	--	--
Unigene14005_NK	639	2161	158.922	--	--	--	--
Unigene26460_NK	2610	8819	158.784	gi|363740363|ref|XP_001233959.2|	320.5	3e-85	PREDICTED: neural proliferation differentiation and control protein 1 [Gallus gallus]
Unigene29057_NK	640	2149	157.792	--	--	--	--
Unigene31512_NK	1992	6686	157.727	gi|17386168|gb|AAL38630.1|AF447708_1	824.3	0	vimentin [Daboia russellii]
Unigene13983_NK	2144	7162	156.978	gi|327279936|ref|XP_003224711.1|	1274.2	0	PREDICTED: signal recognition particle 72 kDa protein-like [Anolis carolinensis]
Unigene14291_NK	730	2418	155.655	gi|327281194|ref|XP_003225334.1|	293.1	8e-78	PREDICTED: dolichyl-diphosphooligosaccharide--protein glycosyltransferase subunit 2-like [Anolis carolinensis]
Unigene30192_NK	902	2987	155.617	--	--	--	--
Unigene25176_NK	222	735	155.583	--	--	--	--
CL66.Contig1_NK	1533	5046	154.68	gi|226372474|gb|ACO51862.1|	200.7	1e-49	Transposable element Tc1 transposase [Rana catesbeiana]
Unigene28910_NK	394	1294	154.336	gi|301619422|ref|XP_002939094.1|	155.2	8e-37	PREDICTED: uncharacterized protein K02A2.6-like [Xenopus (Silurana) tropicalis]
Unigene28400_NK	1362	4466	154.089	gi|449280578|gb|EMC87846.1|	441	6e-122	Cyclin-I, partial [Columba livia]
Unigene31516_NK	978	3202	153.855	gi|444519089|gb|ELV12572.1|	404.8	3e-111	Proteasome subunit beta type-8 [Tupaia chinensis]
Unigene29920_NK	1566	5119	153.611	gi|327288997|ref|XP_003229211.1|	552	3e-155	PREDICTED: calumenin-like [Anolis carolinensis]
Unigene31533_NK	1013	3311	153.595	--	--	--	--
Unigene24110_NK	1492	4865	153.23	--	--	--	--
Unigene31530_NK	947	3087	153.185	gi|327268290|ref|XP_003218931.1|	456.1	1e-126	PREDICTED: peroxiredoxin-4-like [Anolis carolinensis]
CL3206.Contig1_NK	1498	4872	152.835	gi|327285622|ref|XP_003227532.1|	400.6	1e-109	PREDICTED: peptidyl-prolyl cis-trans isomerase B-like [Anolis carolinensis]
Unigene30023_NK	745	2419	152.584	gi|327280955|ref|XP_003225216.1|	297	6e-79	PREDICTED: ETS homologous factor-like [Anolis carolinensis]
CL60.Contig1_NK	340	1099	151.897	--	--	--	--
Unigene6548_NK	1501	4811	150.62	gi|327279492|ref|XP_003224490.1|	647.1	0	PREDICTED: keratin, type I cytoskeletal 18-like [Anolis carolinensis]
Unigene25117_NK	1009	3227	150.292	--	--	--	--
CL3883.Contig1_NK	815	2603	150.088	gi|327276214|ref|XP_003222865.1|	86.7	1e-15	PREDICTED: phospholipase A2 inhibitor subunit gamma B-like [Anolis carolinensis]
Unigene6629_NK	496	1581	149.789	gi|7706326|ref|NP_057131.1|	231.1	1e-59	pre-mRNA branch site protein p14 [Homo sapiens] >gi|13384692|ref|NP_079599.1| pre-mRNA branch site protein p14 [Mus musculus] >gi|50344788|ref|NP_001002067.1| pre-mRNA branch site protein p14 [Danio rerio] >gi|114051091|ref|NP_001039482.1| pre-mRNA branch site protein p14 [Bos taurus] >gi|386781011|ref|NP_001247813.1| pre-mRNA branch site protein p14 [Macaca mulatta] >gi|403420592|ref|NP_00125815…
Unigene6547_NK	1913	6054	148.715	gi|327281791|ref|XP_003225630.1|	548.9	3e-154	PREDICTED: translocon-associated protein subunit alpha-like [Anolis carolinensis]
Unigene29082_NK	768	2429	148.626	gi|449279822|gb|EMC87287.1|	54.7	5e-06	Immunoglobulin G-binding protein A [Columba livia]
Unigene31505_NK	552	1726	146.937	--	--	--	--
Unigene28486_NK	953	2979	146.895	--	--	--	--
CL3586.Contig1_NK	987	3079	146.596	gi|426334036|ref|XP_004028569.1|	370.2	9e-101	PREDICTED: ADP-ribosylation factor 1 isoform 5 [Gorilla gorilla gorilla]
Unigene31528_NK	2644	8234	146.345	gi|465980521|gb|EMP35625.1|	1073.5	0	Dolichyl-diphosphooligosaccharide--protein glycosyltransferase subunit 1 [Chelonia mydas]
Unigene6592_NK	335	1043	146.308	--	--	--	--
Unigene31524_NK	2958	9131	145.06	gi|465966112|gb|EMP30919.1|	714.5	0	Early growth response protein 1 [Chelonia mydas]
Unigene31546_NK	3069	9440	144.545	gi|395833702|ref|XP_003789861.1|	1622.5	0	PREDICTED: staphylococcal nuclease domain-containing protein 1 [Otolemur garnettii]
Unigene20629_NK	552	1686	143.532	--	--	--	--
Unigene6627_NK	484	1475	143.211	gi|238928312|gb|ACR78475.1|	176.8	3e-43	putative GILT [Drysdalia coronoides]
Unigene31539_NK	1001	3033	142.386	--	--	--	--
Unigene23857_NK	256	775	142.263	--	--	--	--
Unigene31542_NK	415	1256	142.223	gi|386782065|ref|NP_001247968.1|	172.6	5e-42	mitochondrial import inner membrane translocase subunit Tim13 [Macaca mulatta] >gi|355702952|gb|EHH29443.1| Mitochondrial import inner membrane translocase subunit Tim13 [Macaca mulatta]
Unigene618_NK	2347	7092	141.999	gi|224070470|ref|XP_002196864.1|	763.5	0	PREDICTED: brain-specific angiogenesis inhibitor 1-associated protein 2-like protein 1 [Taeniopygia guttata]
Unigene31309_NK	1057	3193	141.956	--	--	--	--
Unigene25618_NK	547	1651	141.837	gi|465991600|gb|EMP38645.1|	127.5	3e-28	Interferon-induced transmembrane protein 1 [Chelonia mydas]
Unigene13221_NK	1753	5283	141.621	gi|45382999|ref|NP_989920.1|	219.9	3e-55	DNA-binding protein inhibitor ID-3 [Gallus gallus] >gi|15419003|gb|AAK93835.1| helix-loop-helix protein [Gallus gallus]
Unigene14029_NK	826	2488	141.547	gi|327274226|ref|XP_003221879.1|	201.1	5e-50	PREDICTED: immunoglobulin J chain-like [Anolis carolinensis]
Unigene24508_NK	815	2453	141.439	--	--	--	--
CL2995.Contig1_NK	1613	4848	141.24	gi|301607131|ref|XP_002933173.1|	181.4	1e-43	PREDICTED: hypothetical protein LOC100488659 [Xenopus (Silurana) tropicalis]
Unigene24938_NK	1181	3536	140.699	gi|327276990|ref|XP_003223249.1|	415.2	3e-114	PREDICTED: proliferation-associated protein 2G4-like [Anolis carolinensis]
Unigene25339_NK	936	2794	140.275	--	--	--	--
CL674.Contig3_NK	1009	3008	140.093	gi|327291061|ref|XP_003230240.1|	145.2	4e-33	PREDICTED: GTPase IMAP family member 2-like, partial [Anolis carolinensis]
Unigene6637_NK	864	2567	139.618	gi|363747068|ref|XP_003643901.1|	346.3	1e-93	PREDICTED: LOW QUALITY PROTEIN: transgelin-2-like [Gallus gallus]
Unigene23910_NK	401	1188	139.22	--	--	--	--
CL4520.Contig1_NK	4938	14625	139.179	gi|62078893|ref|NP_001014102.1|	951.8	0	ubiquitin-like modifier-activating enzyme 1 [Rattus norvegicus] >gi|81889667|sp|Q5U300.1|UBA1_RAT RecName: Full=Ubiquitin-like modifier-activating enzyme 1; AltName: Full=Ubiquitin-activating enzyme E1 >gi|55250575|gb|AAH85791.1| Ubiquitin-like modifier activating enzyme 1 [Rattus norvegicus]
Unigene26929_NK	699	2069	139.095	gi|297299881|ref|XP_001099076.2|	164.1	5e-39	PREDICTED: hypothetical protein LOC710457 [Macaca mulatta]
Unigene25698_NK	1213	3578	138.614	gi|406829589|gb|AFS63887.1|	356.3	1e-96	GPX1 [Thamnophis elegans]
Unigene7117_NK	828	2432	138.026	gi|224076514|ref|XP_002198677.1|	214.5	4e-54	PREDICTED: ER membrane protein complex subunit 6 [Taeniopygia guttata]
Unigene14013_NK	2499	7307	137.405	gi|149636850|ref|XP_001509938.1|	197.2	3e-48	PREDICTED: immediate early response gene 2 protein-like [Ornithorhynchus anatinus]
Unigene25103_NK	1164	3401	137.304	gi|327284471|ref|XP_003226961.1|	414.1	7e-114	PREDICTED: eukaryotic translation initiation factor 3 subunit K-like [Anolis carolinensis]
Unigene31559_NK	598	1745	137.127	gi|327286313|ref|XP_003227875.1|	271.6	1e-71	PREDICTED: prefoldin subunit 5-like [Anolis carolinensis]
Unigene21817_NK	318	927	136.988	--	--	--	--
Unigene14004_NK	936	2727	136.911	--	--	--	--
Unigene213_NK	430	1251	136.715	--	--	--	--
Unigene978_NK	372	1080	136.43	gi|55771211|dbj|BAD72127.1|	104	2e-21	reverse transcriptase [Anguilla japonica]
Unigene28205_NK	1076	3123	136.392	--	--	--	--
Unigene26969_NK	1490	4323	136.341	--	--	--	--
CL4145.Contig9_NK	1820	5277	136.252	gi|50752556|ref|XP_422829.1|	350.5	1e-94	PREDICTED: translocon-associated protein subunit gamma [Gallus gallus]
Unigene31411_NK	235	681	136.178	--	--	--	--
Unigene6610_NK	754	2172	135.368	gi|126305837|ref|XP_001363855.1|	362.1	1e-98	PREDICTED: actin-related protein 2/3 complex subunit 3-like [Monodelphis domestica] >gi|334327105|ref|XP_001372889.2| PREDICTED: actin-related protein 2/3 complex subunit 3-like [Monodelphis domestica]
CL2106.Contig1_NK	328	944	135.247	--	--	--	--
Unigene31140_NK	540	1547	134.625	gi|465964540|gb|EMP30378.1|	104.4	2e-21	Protein transport protein Sec31A [Chelonia mydas]
Unigene14173_NK	853	2443	134.587	gi|63146092|gb|AAY33980.1|	344.7	3e-93	cytochrome c oxidase subunit IV [Oxyuranus scutellatus scutellatus]
Unigene21565_NK	1426	4076	134.321	gi|119573509|gb|EAW53124.1|	207.6	1e-51	hCG2040565 [Homo sapiens]
Unigene6624_NK	602	1716	133.952	gi|45384028|ref|NP_990497.1|	156.4	8e-37	protein S100-A11 [Gallus gallus] >gi|2827763|sp|P24479.2|S10AB_CHICK RecName: Full=Protein S100-A11; AltName: Full=Calgizzarin; AltName: Full=S100 calcium-binding protein A11 >gi|1684841|gb|AAB36542.1| calgizzarin [Gallus gallus]
Unigene29940_NK	252	717	133.705	gi|50812362|gb|AAT81393.1|	101.3	1e-20	MHC class I heavy chain [Anser anser]
Unigene25668_NK	685	1948	133.637	gi|334359125|pdb|3AV2|A	266.5	7e-70	Chain A, The Human Nucleosome Structure Containing The Histone Variant H3.3 >gi|334359129|pdb|3AV2|E Chain E, The Human Nucleosome Structure Containing The Histone Variant H3.3
Unigene21615_NK	852	2406	132.704	gi|327264387|ref|XP_003216995.1|	308.1	3e-82	PREDICTED: myosin light polypeptide 6-like isoform 2 [Anolis carolinensis]
CL3786.Contig1_NK	551	1554	132.534	--	--	--	--
CL1433.Contig2_NK	1835	5164	132.245	gi|345328363|ref|XP_001510356.2|	633.3	1e-179	PREDICTED: liver carboxylesterase 1-like [Ornithorhynchus anatinus]
Unigene31381_NK	274	770	132.059	--	--	--	--
Unigene31525_NK	745	2091	131.894	gi|449280799|gb|EMC88025.1|	280.4	5e-74	Lysozyme g, partial [Columba livia]
Unigene29718_NK	2580	7239	131.852	gi|326916753|ref|XP_003204669.1|	629.4	2e-178	PREDICTED: cathepsin B-like [Meleagris gallopavo]
Unigene26832_NK	1929	5398	131.501	gi|327262002|ref|XP_003215815.1|	433.7	1e-119	PREDICTED: ezrin-like [Anolis carolinensis]
Unigene21829_NK	1515	4233	131.3	gi|327260310|ref|XP_003214977.1|	602.8	1e-170	PREDICTED: actin-related protein 2/3 complex subunit 2-like [Anolis carolinensis]
CL5530.Contig1_NK	1058	2953	131.162	gi|432957528|ref|XP_004085839.1|	208.4	5e-52	PREDICTED: uncharacterized protein LOC101169091 [Oryzias latipes]
Unigene18773_NK	1788	4931	129.597	gi|4759160|ref|NP_004166.1|	252.3	6e-65	small nuclear ribonucleoprotein Sm D3 [Homo sapiens] >gi|13385598|ref|NP_080371.1| small nuclear ribonucleoprotein Sm D3 [Mus musculus] >gi|56119060|ref|NP_001007839.1| small nuclear ribonucleoprotein Sm D3 [Gallus gallus] >gi|62859245|ref|NP_001017093.1| small nuclear ribonucleoprotein D3 polypeptide 18kDa [Xenopus (Silurana) tropicalis] >gi|148230601|ref|NP_001084936.1| small nuclear ribonucleo…
Unigene23542_NK	328	900	128.943	--	--	--	--
Unigene22147_NK	1083	2969	128.828	gi|119617872|gb|EAW97466.1|	52	2e-57	B-cell translocation gene 1, anti-proliferative, isoform CRA_a [Homo sapiens]
Unigene14133_NK	590	1617	128.791	gi|327281621|ref|XP_003225545.1|	89	1e-16	PREDICTED: nucleolin-like [Anolis carolinensis]
Unigene25678_NK	2135	5836	128.454	gi|327286717|ref|XP_003228076.1|	592	4e-167	PREDICTED: alpha-soluble NSF attachment protein-like [Anolis carolinensis]
Unigene24065_NK	3456	9391	127.693	gi|327279416|ref|XP_003224452.1|	714.5	0	PREDICTED: LOW QUALITY PROTEIN: forkhead box protein C1-like [Anolis carolinensis]
Unigene22511_NK	1488	4043	127.682	gi|45382667|ref|NP_990035.1|	278.1	8e-73	transforming protein RhoA [Gallus gallus] >gi|3184514|gb|AAC18962.1| GTPase cRhoA [Gallus gallus] >gi|4218981|gb|AAD12255.1| GTP-binding protein [Gallus gallus] >gi|10178874|emb|CAC08447.1| RhoA GTPase [Gallus gallus] >gi|217874317|gb|ACK56277.1| RhoA GTPase [Anas platyrhynchos]
Unigene23119_NK	1875	5092	127.619	gi|71896843|ref|NP_001026174.1|	198	1e-48	death-associated protein 1 [Gallus gallus] >gi|380846555|gb|AFE84782.1| death associated protein 1 [Gallus gallus] >gi|380846557|gb|AFE84783.1| death associated protein 1 [Meleagris gallopavo]
Unigene21530_NK	1685	4574	127.563	gi|465998301|gb|EMP40604.1|	401.4	7e-110	GTP-binding protein SAR1a [Chelonia mydas]
Unigene31535_NK	1046	2835	127.365	gi|334359125|pdb|3AV2|A	265.4	3e-69	Chain A, The Human Nucleosome Structure Containing The Histone Variant H3.3 >gi|334359129|pdb|3AV2|E Chain E, The Human Nucleosome Structure Containing The Histone Variant H3.3
Unigene20939_NK	230	623	127.288	gi|327264291|ref|XP_003216947.1|	128.3	1e-28	PREDICTED: n-alpha-acetyltransferase 10, NatA catalytic subunit-like [Anolis carolinensis]
Unigene6945_NK	1611	4321	126.043	gi|466003424|gb|EMP42084.1|	788.1	0	Dolichyl-diphosphooligosaccharide--protein glycosyltransferase 48 kDa subunit [Chelonia mydas]
Unigene31496_NK	854	2285	125.735	--	--	--	--
Unigene6588_NK	385	1026	125.232	gi|224057620|ref|XP_002187197.1|	129.4	5e-29	PREDICTED: guanine nucleotide-binding protein G(I)/G(S)/G(O) subunit gamma-5 [Taeniopygia guttata]
Unigene31534_NK	578	1537	124.961	gi|327289776|ref|XP_003229600.1|	228.8	1e-58	PREDICTED: dolichyl-diphosphooligosaccharide--protein glycosyltransferase subunit DAD1-like [Anolis carolinensis]
Unigene7232_NK	3512	9319	124.694	gi|54020693|ref|NP_989562.2|	583.6	2e-164	ADP/ATP translocase 3 [Gallus gallus]
Unigene31563_NK	524	1390	124.656	gi|355779857|gb|EHH64333.1|	68.2	2e-10	hypothetical protein EGM_17517 [Macaca fascicularis]
Unigene25441_NK	1737	4606	124.61	gi|327281621|ref|XP_003225545.1|	704.9	0	PREDICTED: nucleolin-like [Anolis carolinensis]
Unigene14231_NK	764	2022	124.37	gi|327273710|ref|XP_003221623.1|	303.1	8e-81	PREDICTED: transmembrane protein 165-like [Anolis carolinensis]
Unigene23619_NK	1843	4869	124.149	gi|57529439|ref|NP_001006303.1|	906.7	0	6-phosphogluconate dehydrogenase, decarboxylating [Gallus gallus]
Unigene31513_NK	862	2269	123.696	gi|327285688|ref|XP_003227565.1|	219.2	2e-55	PREDICTED: cytochrome c oxidase subunit 5A, mitochondrial-like [Anolis carolinensis]
Unigene26833_NK	1480	3888	123.451	gi|315113883|ref|NP_001186694.1|	271.6	7e-71	15 kDa selenoprotein precursor [Taeniopygia guttata]
Unigene79_NK	951	2486	122.843	gi|466000802|gb|EMP41349.1|	219.2	2e-55	Immunoglobulin lambda-like polypeptide 5 [Chelonia mydas]
Unigene21273_NK	1074	2803	122.644	gi|327289596|ref|XP_003229510.1|	265.4	3e-69	PREDICTED: selenoprotein S-like [Anolis carolinensis]
Unigene14275_NK	1212	3162	122.599	gi|327277368|ref|XP_003223437.1|	638.6	0	PREDICTED: fibronectin type-III domain-containing protein 3a-like, partial [Anolis carolinensis]
Unigene25579_NK	2714	7053	122.122	gi|327284271|ref|XP_003226862.1|	976.5	0	PREDICTED: proline dehydrogenase, mitochondrial-like [Anolis carolinensis]
CL861.Contig1_NK	1236	3209	122.006	gi|82232159|sp|Q5MCS0.1|VSPHA_LAPHA	464.2	6e-129	RecName: Full=Serine protease harobin; AltName: Full=Fibrin(ogen)olytic enzyme; AltName: Full=Snake venom serine protease; Short=SVSP; Flags: Precursor >gi|56566179|gb|AAV98367.1| serine protease precursor [Lapemis hardwickii]
Unigene13585_NK	210	545	121.957	gi|432865271|ref|XP_004070501.1|	58.9	8e-08	PREDICTED: ADP-ribosylation factor 3-like [Oryzias latipes]
Unigene22197_NK	469	1216	121.84	gi|4506717|ref|NP_001023.1|	127.5	1e-28	40S ribosomal protein S29 isoform 1 [Homo sapiens] >gi|6677803|ref|NP_033119.1| 40S ribosomal protein S29 [Mus musculus] >gi|6981490|ref|NP_037008.1| 40S ribosomal protein S29 [Rattus norvegicus] >gi|27807381|ref|NP_777229.1| 40S ribosomal protein S29 [Bos taurus] >gi|62857725|ref|NP_001016766.1| ribosomal protein S29 [Xenopus (Silurana) tropicalis] >gi|197098290|ref|NP_001127434.1| 40S ribosomal…
Unigene31552_NK	1424	3691	121.804	gi|224071710|ref|XP_002197338.1|	369	3e-100	PREDICTED: glycolipid transfer protein [Taeniopygia guttata]
Unigene22334_NK	702	1817	121.632	--	--	--	--
Unigene31520_NK	741	1916	121.508	gi|327291950|ref|XP_003230683.1|	97.8	5e-19	PREDICTED: apolipoprotein C-I, basic form-like [Anolis carolinensis]
Unigene31532_NK	2144	5539	121.405	gi|326930769|ref|XP_003211514.1|	382.9	3e-104	PREDICTED: rho GDP-dissociation inhibitor 1-like [Meleagris gallopavo]
CL5619.Contig1_NK	1400	3611	121.207	gi|327261951|ref|XP_003215790.1|	204.1	1e-50	PREDICTED: proteolipid protein 2-like [Anolis carolinensis]
Unigene28428_NK	678	1745	120.947	--	--	--	--
Unigene28801_NK	2774	7135	120.869	gi|327282966|ref|XP_003226213.1|	758.8	0	PREDICTED: Golgi reassembly-stacking protein 2-like [Anolis carolinensis]
Unigene31553_NK	1137	2919	120.643	gi|327280876|ref|XP_003225177.1|	371.7	3e-101	PREDICTED: endoplasmic reticulum resident protein 29-like [Anolis carolinensis]
Unigene24936_NK	841	2159	120.638	gi|327276990|ref|XP_003223249.1|	348.2	2e-94	PREDICTED: proliferation-associated protein 2G4-like [Anolis carolinensis]
Unigene22122_NK	247	633	120.43	gi|327275183|ref|XP_003222353.1|	158.7	7e-38	PREDICTED: endoplasmic reticulum resident protein 44-like [Anolis carolinensis]
Unigene13858_NK	959	2457	120.397	--	--	--	--
Unigene6617_NK	743	1902	120.296	gi|327283486|ref|XP_003226472.1|	250.8	4e-65	PREDICTED: ATP synthase lipid-binding protein, mitochondrial-like [Anolis carolinensis]
Unigene26458_NK	1344	3432	119.999	--	--	--	--
Unigene31548_NK	1082	2759	119.827	gi|327280512|ref|XP_003224996.1|	271.9	3e-71	PREDICTED: alpha-crystallin B chain-like [Anolis carolinensis]
Unigene31417_NK	406	1035	119.796	--	--	--	--
Unigene31531_NK	2055	5237	119.757	gi|327265069|ref|XP_003217331.1|	640.2	0	PREDICTED: protein Tob1-like [Anolis carolinensis]
CL2459.Contig2_NK	623	1586	119.631	--	--	--	--
Unigene23986_NK	763	1942	119.606	--	--	--	--
Unigene29752_NK	1024	2604	119.501	gi|348572492|ref|XP_003472026.1|	627.1	4e-178	PREDICTED: 26S proteasome non-ATPase regulatory subunit 7-like [Cavia porcellus]
Unigene31537_NK	1698	4313	119.363	gi|327283396|ref|XP_003226427.1|	496.5	1e-138	PREDICTED: tetraspanin-3-like isoform 1 [Anolis carolinensis]
Unigene30883_NK	747	1893	119.085	--	--	--	--
Unigene7216_NK	513	1299	118.993	gi|327260906|ref|XP_003215274.1|	243.8	2e-63	PREDICTED: nuclear nucleic acid-binding protein C1D-like [Anolis carolinensis]
Unigene828_NK	857	2166	118.77	gi|327286244|ref|XP_003227841.1|	83.2	1e-14	PREDICTED: integral membrane protein 2A-like [Anolis carolinensis]
CL3249.Contig1_NK	338	854	118.733	--	--	--	--
Unigene31554_NK	701	1764	118.252	gi|327290010|ref|XP_003229717.1|	194.9	2e-48	PREDICTED: protein S100-A10-like isoform 1 [Anolis carolinensis] >gi|327290012|ref|XP_003229718.1| PREDICTED: protein S100-A10-like isoform 2 [Anolis carolinensis] >gi|327290014|ref|XP_003229719.1| PREDICTED: protein S100-A10-like isoform 3 [Anolis carolinensis]
CL5424.Contig21_NK	1565	3925	117.857	gi|408816336|dbj|BAM62877.1|	565.5	2e-159	L1-encoded reverse transcriptase-like protein [Trimeresurus flavoviridis]
Unigene14406_NK	2029	5078	117.609	gi|327273843|ref|XP_003221689.1|	453	2e-125	PREDICTED: vascular endothelial growth factor C-like [Anolis carolinensis]
Unigene28450_NK	1036	2589	117.436	--	--	--	--
Unigene8444_NK	1654	4125	117.197	gi|465959269|gb|EMP28344.1|	283.9	1e-74	Endothelial differentiation-related factor 1 like protein [Chelonia mydas]
Unigene13616_NK	737	1838	117.194	gi|397502369|ref|XP_003821833.1|	394.4	2e-108	PREDICTED: 14-3-3 protein zeta/delta [Pan paniscus]
Unigene27235_NK	325	810	117.12	--	--	--	--
Unigene7551_NK	1493	3719	117.056	gi|126297808|ref|XP_001368358.1|	275	7e-72	PREDICTED: immediate early response gene 5-like protein-like [Monodelphis domestica]
Unigene14193_NK	901	2237	116.673	--	--	--	--
Unigene31561_NK	1419	3518	116.504	gi|224049534|ref|XP_002197094.1|	297.7	9e-79	PREDICTED: oligosaccharyltransferase complex subunit OSTC [Taeniopygia guttata]
Unigene27179_NK	900	2223	116.072	--	--	--	--
Unigene28487_NK	603	1489	116.04	gi|348518187|ref|XP_003446613.1|	361.7	1e-98	PREDICTED: tubulin alpha-1C chain-like [Oreochromis niloticus]
Unigene22241_NK	910	2245	115.932	gi|390479600|ref|XP_002762751.2|	299.7	1e-79	PREDICTED: eukaryotic translation initiation factor 1A, X-chromosomal-like [Callithrix jacchus]
CL3939.Contig11_NK	1575	3878	115.706	gi|188501719|gb|ACD54828.1|	414.5	8e-114	MHC class I antigen [Amblyrhynchus cristatus]
CL4576.Contig1_NK	1515	3727	115.605	gi|317412168|sp|D9IX97.1|VNP_NAJAT	66.6	4e-09	RecName: Full=Natriuretic peptide Na-NP; Flags: Precursor >gi|300430031|gb|ADK12001.1| natriuretic peptide [Naja atra]
Unigene29539_NK	1077	2645	115.409	gi|465954486|gb|EMP25925.1|	70.9	1e-10	Cytosolic acyl coenzyme A thioester hydrolase [Chelonia mydas]
Unigene31419_NK	311	763	115.29	--	--	--	--
Unigene30546_NK	720	1766	115.262	--	--	--	--
Unigene31567_NK	612	1499	115.101	--	--	--	--
CL2997.Contig2_NK	2916	7139	115.048	gi|327262169|ref|XP_003215898.1|	859.8	0	PREDICTED: LOW QUALITY PROTEIN: ERO1-like protein beta-like [Anolis carolinensis]
Unigene23964_NK	1475	3599	114.662	gi|327272772|ref|XP_003221158.1|	678.3	0	PREDICTED: phosphate carrier protein, mitochondrial-like isoform 1 [Anolis carolinensis]
Unigene25655_NK	782	1908	114.657	gi|327276297|ref|XP_003222906.1|	269.2	1e-70	PREDICTED: intermediate conductance calcium-activated potassium channel protein 4-like [Anolis carolinensis]
Unigene26464_NK	4238	10315	114.377	gi|326935892|ref|XP_003213999.1|	2441.8	0	PREDICTED: coatomer subunit alpha-like [Meleagris gallopavo]
Unigene28102_NK	753	1827	114.018	gi|124231|sp|P10160.2|IF5A1_RABIT	308.5	2e-82	RecName: Full=Eukaryotic translation initiation factor 5A-1; Short=eIF-5A-1; Short=eIF-5A1; AltName: Full=Eukaryotic initiation factor 5A isoform 1; Short=eIF-5A; AltName: Full=eIF-4D
Unigene28521_NK	1101	2669	113.917	gi|515694|gb|AAA49112.1|	436.4	1e-120	tropomyosin [Gallus gallus]
Unigene14092_NK	574	1389	113.715	gi|327278711|ref|XP_003224104.1|	149.8	6e-35	PREDICTED: cystatin-B-like [Anolis carolinensis]
CL859.Contig1_NK	2856	6911	113.713	gi|14285211|gb|AAK58879.1|AF355375_1	402.1	8e-110	putative reverse transcriptase [Takifugu rubripes]
Unigene31500_NK	1453	3508	113.455	gi|327266936|ref|XP_003218259.1|	181.4	1e-43	PREDICTED: retinoic acid receptor responder protein 1-like [Anolis carolinensis]
Unigene31573_NK	1062	2563	113.41	gi|126277482|ref|XP_001369563.1|	354	7e-96	PREDICTED: proteasome activator complex subunit 2-like [Monodelphis domestica]
Unigene14001_NK	632	1525	113.392	gi|465977050|gb|EMP34604.1|	114	5e-24	Gelsolin [Chelonia mydas]
CL4110.Contig5_NK	299	721	113.317	--	--	--	--
Unigene24529_NK	4259	10264	113.25	gi|327274118|ref|XP_003221825.1|	1718	0	PREDICTED: protein transport protein Sec24D-like [Anolis carolinensis]
CL3401.Contig2_NK	1181	2844	113.164	--	--	--	--
Unigene30717_NK	1224	2943	112.989	--	--	--	--
Unigene18823_NK	583	1401	112.927	gi|449492287|ref|XP_004175562.1|	139.8	7e-32	PREDICTED: protein transport protein Sec61 subunit gamma isoform 2 [Taeniopygia guttata]
Unigene15063_NK	343	824	112.892	gi|327280914|ref|XP_003225196.1|	97.1	2e-19	PREDICTED: stromal cell-derived factor 2-like protein 1-like [Anolis carolinensis]
Unigene31558_NK	612	1470	112.874	--	--	--	--
Unigene30747_NK	891	2139	112.814	--	--	--	--
Unigene23480_NK	347	833	112.809	--	--	--	--
Unigene26909_NK	2083	4995	112.687	gi|327276391|ref|XP_003222953.1|	574.7	6e-162	PREDICTED: transforming growth factor beta-1-like [Anolis carolinensis]
Unigene14211_NK	1509	3617	112.639	gi|50801766|ref|XP_424186.1|	125.2	9e-27	PREDICTED: uncharacterized protein LOC426548 [Gallus gallus]
Unigene6623_NK	964	2309	112.558	gi|327272742|ref|XP_003221143.1|	362.5	1e-98	PREDICTED: ADP-ribosylation factor-like protein 1-like [Anolis carolinensis]
Unigene15035_NK	274	655	112.336	--	--	--	--
Unigene6599_NK	843	2013	112.213	gi|20067631|emb|CAC83780.1|	315.8	1e-84	phosphoglucose isomerase [Boiga kraepelini]
Unigene31518_NK	1212	2890	112.053	gi|330376140|gb|AEC13302.1|	492.7	1e-137	cathepsin H [Gallus gallus]
Unigene13584_NK	640	1525	111.974	gi|431901379|gb|ELK08405.1|	321.6	1e-86	Protein Wnt-10b [Pteropus alecto]
Unigene31549_NK	1449	3442	111.627	gi|327285388|ref|XP_003227416.1|	172.2	6e-41	PREDICTED: SH3 domain-binding glutamic acid-rich-like protein 3-like [Anolis carolinensis]
Unigene22298_NK	1708	4053	111.511	gi|239977113|sp|Q5ZKE5.2|CAB45_CHICK	681.8	0	RecName: Full=45 kDa calcium-binding protein; Short=Cab45; AltName: Full=Stromal cell-derived factor 4; Short=SDF-4; Flags: Precursor
Unigene31582_NK	1180	2800	111.508	gi|327291259|ref|XP_003230339.1|	417.9	5e-115	PREDICTED: complement component 1 Q subcomponent-binding protein, mitochondrial-like [Anolis carolinensis]
Unigene31585_NK	599	1421	111.48	gi|127377|sp|P15786.1|MT1_COLLI	136	1e-30	RecName: Full=Metallothionein-1; Short=MT-1; AltName: Full=Metallothionein-I; Short=MT-I >gi|449282556|gb|EMC89389.1| Metallothionein-1 [Columba livia]
Unigene27918_NK	642	1522	111.406	--	--	--	--
Unigene15006_NK	239	566	111.288	--	--	--	--
Unigene20782_NK	1992	4704	110.97	gi|327291105|ref|XP_003230262.1|	1008.4	0	PREDICTED: t-complex protein 1 subunit gamma-like isoform 1 [Anolis carolinensis]
CL4574.Contig4_NK	2489	5865	110.732	gi|327266654|ref|XP_003218119.1|	916.8	0	PREDICTED: complement C4-B-like, partial [Anolis carolinensis]
Unigene27462_NK	1376	3240	110.651	gi|344292808|ref|XP_003418117.1|	242.7	3e-62	PREDICTED: microtubule-associated proteins 1A/1B light chain 3B-like [Loxodonta africana] >gi|471380010|ref|XP_004377801.1| PREDICTED: microtubule-associated proteins 1A/1B light chain 3B [Trichechus manatus latirostris]
Unigene23757_NK	544	1280	110.571	gi|395831250|ref|XP_003788718.1|	256.9	3e-67	PREDICTED: lipid phosphate phosphohydrolase 2 [Otolemur garnettii]
Unigene21337_NK	1886	4426	110.281	gi|327288100|ref|XP_003228766.1|	256.5	3e-66	PREDICTED: MARCKS-related protein-like [Anolis carolinensis]
Unigene23805_NK	1011	2372	110.254	gi|71895411|ref|NP_001025768.1|	637.9	0	coatomer subunit gamma [Gallus gallus]
CL66.Contig5_NK	222	520	110.073	--	--	--	--
Unigene6621_NK	600	1405	110.041	gi|327291203|ref|XP_003230311.1|	219.2	1e-55	PREDICTED: probable ribosome biogenesis protein RLP24-like [Anolis carolinensis]
Unigene22647_NK	1988	4651	109.941	gi|465993186|gb|EMP39130.1|	58.5	1e-06	H/ACA ribonucleoprotein complex subunit 4 [Chelonia mydas]
CL4241.Contig1_NK	1482	3456	109.586	gi|327291792|ref|XP_003230604.1|	183.7	2e-44	PREDICTED: vesicle-associated membrane protein 8-like, partial [Anolis carolinensis]
Unigene21032_NK	1732	4038	109.559	gi|327272420|ref|XP_003220983.1|	1081.6	0	PREDICTED: eukaryotic translation initiation factor 3 subunit D-like [Anolis carolinensis]
Unigene29882_NK	729	1696	109.327	--	--	--	--
Unigene13725_NK	542	1256	108.898	gi|334346923|ref|XP_001375285.2|	180.3	3e-44	PREDICTED: vesicle-associated membrane protein 3-like [Monodelphis domestica]
Unigene13580_NK	707	1638	108.874	gi|327277964|ref|XP_003223733.1|	139	1e-31	PREDICTED: serglycin-like [Anolis carolinensis]
Unigene6557_NK	1247	2889	108.87	gi|327269412|ref|XP_003219488.1|	413.3	1e-113	PREDICTED: receptor-binding cancer antigen expressed on SiSo cells-like [Anolis carolinensis]
Unigene31583_NK	1024	2369	108.716	gi|440898087|gb|ELR49658.1|	335.1	3e-90	Proteasome activator complex subunit 1 [Bos grunniens mutus]
Unigene31526_NK	3565	8225	108.419	gi|327290559|ref|XP_003229990.1|	1448.3	0	PREDICTED: hypoxia up-regulated protein 1-like [Anolis carolinensis]
Unigene11957_NK	579	1334	108.269	gi|327265190|ref|XP_003217391.1|	161.8	1e-38	PREDICTED: v-type proton ATPase subunit e 1-like [Anolis carolinensis]
Unigene13900_NK	2060	4734	107.992	gi|63146078|gb|AAY33973.1|	1239.6	0	HSP70 [Oxyuranus scutellatus scutellatus]
Unigene31529_NK	3587	8227	107.78	gi|327272151|ref|XP_003220849.1|	716.8	0	PREDICTED: adiponectin receptor protein 2-like [Anolis carolinensis]
Unigene20318_NK	814	1862	107.494	gi|126165282|ref|NP_001075177.1|	214.2	6e-54	transcription initiation factor IIA subunit 2 [Gallus gallus] >gi|121308871|dbj|BAF43532.1| general transcription facter IIA subunit 2 [Gallus gallus]
CL3709.Contig1_NK	783	1791	107.489	--	--	--	--
CL1435.Contig1_NK	1435	3271	107.117	gi|403309917|gb|AFR33843.1|	706.8	0	immunoglobulin Y2 heavy chain constant region, partial [Orthriophis taeniurus]
Unigene30417_NK	2699	6146	107.009	gi|50758178|ref|XP_415797.1|	479.2	5e-133	PREDICTED: UPF0458 protein C7orf42 [Gallus gallus]
Unigene31560_NK	1163	2647	106.956	gi|444732430|gb|ELW72725.1|	70.9	1e-10	hypothetical protein TREES_T100011369 [Tupaia chinensis]
Unigene275_NK	700	1593	106.942	gi|300218775|gb|ADJ80991.1|	66.6	2e-39	CR1-3 [Lycodichthys dearborni]
CL841.Contig2_NK	2011	4568	106.744	gi|62858913|ref|NP_001017087.1|	423.3	2e-116	tropomyosin 3, gamma [Xenopus (Silurana) tropicalis] >gi|89266911|emb|CAJ82227.1| tropomyosin 4 [Xenopus (Silurana) tropicalis] >gi|134023769|gb|AAI35408.1| tpm3 protein [Xenopus (Silurana) tropicalis]
Unigene24146_NK	695	1578	106.697	gi|449276664|gb|EMC85096.1|	361.3	2e-98	Ras-related protein Rab-7a [Columba livia]
Unigene31545_NK	2012	4567	106.668	gi|327259463|ref|XP_003214556.1|	1028.8	0	PREDICTED: ATP synthase subunit alpha, mitochondrial-like [Anolis carolinensis]
CL3800.Contig2_NK	660	1497	106.588	--	--	--	--
Unigene30758_NK	1015	2301	106.532	--	--	--	--
Unigene31568_NK	881	1995	106.413	gi|45382479|ref|NP_990696.1|	383.6	6e-105	glutathione S-transferase theta-1 [Gallus gallus] >gi|1170112|sp|P20135.3|GSTT1_CHICK RecName: Full=Glutathione S-transferase theta-1; AltName: Full=GST class-theta; AltName: Full=GST-CL1 >gi|533139|gb|AAA91968.1| theta glutathione-S-transferase [Gallus gallus]
Unigene28151_NK	1166	2637	106.277	gi|327259210|ref|XP_003214431.1|	234.6	7e-60	PREDICTED: epididymal secretory protein E1-like [Anolis carolinensis]
CL1983.Contig1_NK	265	599	106.221	gi|382934478|gb|AFG31713.1|	110.2	3e-23	MHC class II antigen DR beta chain, partial [Saccopteryx bilineata]
Unigene29545_NK	1459	3290	105.967	--	--	--	--
Unigene14209_NK	1406	3165	105.783	--	--	--	--
Unigene31557_NK	754	1697	105.764	gi|327275596|ref|XP_003222559.1|	402.1	1e-110	PREDICTED: proteasome subunit beta type-3-like [Anolis carolinensis]
CL2484.Contig1_NK	340	765	105.733	--	--	--	--
Unigene14276_NK	3219	7237	105.649	gi|327277368|ref|XP_003223437.1|	243.4	5e-62	PREDICTED: fibronectin type-III domain-containing protein 3a-like, partial [Anolis carolinensis]
Unigene27970_NK	4270	9598	105.629	gi|363739019|ref|XP_001233249.2|	567.4	2e-159	PREDICTED: sequestosome-1 isoform 1 [Gallus gallus]
Unigene21403_NK	2157	4843	105.51	gi|327264528|ref|XP_003217065.1|	330.9	1e-88	PREDICTED: prostaglandin E synthase 3-like [Anolis carolinensis]
CL5518.Contig3_NK	616	1381	105.352	gi|432950267|ref|XP_004084454.1|	43.9	1e-26	PREDICTED: uncharacterized protein LOC101164452 [Oryzias latipes]
Unigene14099_NK	436	977	105.302	gi|327288644|ref|XP_003229036.1|	93.6	3e-18	PREDICTED: ATP synthase subunit epsilon, mitochondrial-like [Anolis carolinensis]
Unigene8707_NK	698	1561	105.094	gi|348568742|ref|XP_003470157.1|	353.6	4e-96	PREDICTED: malate dehydrogenase, mitochondrial [Cavia porcellus]
Unigene28265_NK	471	1052	104.96	--	--	--	--
Unigene27177_NK	1305	2910	104.788	gi|327266482|ref|XP_003218034.1|	283.5	1e-74	PREDICTED: spliceosome RNA helicase BAT1-like [Anolis carolinensis]
Unigene31527_NK	978	2171	104.316	gi|224073935|ref|XP_002191642.1|	472.2	1e-131	PREDICTED: proteasome subunit beta type-7 [Taeniopygia guttata]
Unigene20963_NK	1721	3813	104.115	gi|327276633|ref|XP_003223072.1|	351.7	7e-95	PREDICTED: receptor expression-enhancing protein 5-like [Anolis carolinensis]
Unigene30393_NK	234	518	104.026	--	--	--	--
Unigene24561_NK	490	1083	103.863	gi|465974111|gb|EMP33659.1|	305.4	6e-82	Transmembrane protein 39A [Chelonia mydas]
CL2277.Contig1_NK	3569	7884	103.808	gi|327284215|ref|XP_003226834.1|	1959.9	0	PREDICTED: sodium/potassium-transporting ATPase subunit alpha-1-like [Anolis carolinensis]
Unigene31571_NK	1394	3077	103.727	gi|327260832|ref|XP_003215237.1|	507.3	7e-142	PREDICTED: malate dehydrogenase, cytoplasmic-like [Anolis carolinensis]
Unigene23698_NK	1121	2473	103.669	--	--	--	--
Unigene23966_NK	908	2002	103.611	gi|432915657|ref|XP_004079196.1|	299.3	1e-79	PREDICTED: ras-related protein Rab-2A-like [Oryzias latipes]
Unigene6618_NK	1451	3196	103.507	gi|344287504|ref|XP_003415493.1|	662.1	0	PREDICTED: serine/arginine-rich splicing factor 4-like [Loxodonta africana]
CL37.Contig1_NK	360	792	103.384	--	--	--	--
Unigene31547_NK	2761	6064	103.21	gi|327278086|ref|XP_003223793.1|	1029.6	0	PREDICTED: complement C1s subcomponent-like [Anolis carolinensis]
Unigene28475_NK	2562	5617	103.028	gi|327267857|ref|XP_003218715.1|	864	0	PREDICTED: dnaJ homolog subfamily C member 3-like [Anolis carolinensis]
Unigene17172_NK	2808	6154	102.989	gi|224061765|ref|XP_002195695.1|	539.3	4e-151	PREDICTED: secretory carrier-associated membrane protein 2 [Taeniopygia guttata]
Unigene31540_NK	989	2167	102.965	gi|71896361|ref|NP_001026105.1|	382.9	1e-104	acidic leucine-rich nuclear phosphoprotein 32 family member B [Gallus gallus] >gi|82233971|sp|Q5ZMN0.1|AN32B_CHICK RecName: Full=Acidic leucine-rich nuclear phosphoprotein 32 family member B
Unigene6626_NK	264	577	102.707	--	--	--	--
Unigene25036_NK	2563	5598	102.639	gi|327279376|ref|XP_003224432.1|	602.4	3e-170	PREDICTED: multiple inositol polyphosphate phosphatase 1-like [Anolis carolinensis]
CL5039.Contig1_NK	4063	8860	102.475	gi|327290024|ref|XP_003229724.1|	1733	0	PREDICTED: structural maintenance of chromosomes flexible hinge domain-containing protein 1-like, partial [Anolis carolinensis]
Unigene30689_NK	771	1681	102.457	--	--	--	--
Unigene8822_NK	1328	2890	102.265	gi|327281075|ref|XP_003225275.1|	388.3	5e-106	PREDICTED: claudin-4-like [Anolis carolinensis]
Unigene7494_NK	1378	2998	102.238	gi|327284876|ref|XP_003227161.1|	173.7	2e-41	PREDICTED: hypothetical protein LOC100567022 [Anolis carolinensis]
Unigene30408_NK	400	869	102.091	gi|465993675|gb|EMP39318.1|	132.9	4e-30	Transcription factor SOX-9 [Chelonia mydas]
Unigene29018_NK	3017	6553	102.069	gi|327281703|ref|XP_003225586.1|	344	2e-92	PREDICTED: protein tyrosine phosphatase type IVA 2-like [Anolis carolinensis]
Unigene14194_NK	1611	3497	102.007	gi|297263145|ref|XP_001093980.2|	386.7	1e-105	PREDICTED: hypothetical protein LOC705622 [Macaca mulatta]
Unigene30065_NK	304	657	101.559	gi|390348168|ref|XP_003726954.1|	69.3	6e-11	PREDICTED: uncharacterized protein LOC100892812 [Strongylocentrotus purpuratus]
Unigene26413_NK	782	1690	101.557	--	--	--	--
Unigene29691_NK	1040	2247	101.531	gi|327281163|ref|XP_003225319.1|	696	0	PREDICTED: protein arginine N-methyltransferase 1-like [Anolis carolinensis]
Unigene25636_NK	1470	3175	101.498	gi|327282894|ref|XP_003226177.1|	866.7	0	PREDICTED: stromal interaction molecule 2-like [Anolis carolinensis]
CL4223.Contig1_NK	1060	2287	101.389	--	--	--	--
Unigene28427_NK	661	1426	101.379	--	--	--	--
Unigene21679_NK	1801	3877	101.16	gi|327263786|ref|XP_003216698.1|	393.3	2e-107	PREDICTED: transforming protein RhoA-like [Anolis carolinensis]
Unigene22748_NK	2366	5085	100.996	gi|449499204|ref|XP_004176528.1|	864	0	PREDICTED: non-POU domain-containing octamer-binding protein [Taeniopygia guttata]
Unigene23658_NK	1563	3357	100.93	gi|327288502|ref|XP_003228965.1|	372.5	3e-101	PREDICTED: cationic amino acid transporter 3-like [Anolis carolinensis]
Unigene29351_NK	373	801	100.914	gi|390369102|ref|XP_001184017.2|	100.1	3e-20	PREDICTED: H(+)/Cl(-) exchange transporter 7-like, partial [Strongylocentrotus purpuratus]
Unigene22620_NK	1442	3095	100.861	gi|327259893|ref|XP_003214770.1|	801.2	0	PREDICTED: eukaryotic translation initiation factor 4 gamma 2-like [Anolis carolinensis]
CL2128.Contig4_NK	2517	5391	100.65	gi|148691289|gb|EDL23236.1|	907.5	0	tubulin, beta 5 [Mus musculus]
Unigene23782_NK	706	1511	100.575	gi|327286578|ref|XP_003228007.1|	112.8	1e-23	PREDICTED: stress-induced-phosphoprotein 1-like [Anolis carolinensis]
Unigene6616_NK	1740	3723	100.548	gi|327267692|ref|XP_003218633.1|	825.9	0	PREDICTED: ornithine aminotransferase, mitochondrial-like [Anolis carolinensis]
Unigene23756_NK	1149	2449	100.161	gi|363743689|ref|XP_003642894.1|	225.3	4e-57	PREDICTED: lipid phosphate phosphohydrolase 2-like [Gallus gallus]
Unigene27242_NK	2958	6297	100.038	gi|327287040|ref|XP_003228237.1|	1031.5	0	PREDICTED: UDP-N-acetylglucosamine--peptide N-acetylglucosaminyltransferase 110 kDa subunit-like isoform 3 [Anolis carolinensis]
Unigene27053_NK	2275	4828	99.7275	gi|327272860|ref|XP_003221202.1|	773.1	0	PREDICTED: nucleosome assembly protein 1-like 1-like [Anolis carolinensis]
Unigene20478_NK	352	747	99.7256	gi|465977412|gb|EMP34743.1|	240.7	1e-62	Actin-related protein 3, partial [Chelonia mydas]
Unigene13390_NK	447	948	99.662	gi|350538615|ref|NP_001232790.1|	171	1e-41	uncharacterized protein LOC100232347 [Taeniopygia guttata]
Unigene26917_NK	221	468	99.5136	--	--	--	--
Unigene26477_NK	1574	3330	99.4188	gi|465950605|gb|EMP23887.1|	349.7	2e-94	Epithelial cell adhesion molecule [Chelonia mydas]
Unigene9838_NK	250	528	99.2482	--	--	--	--
Unigene30039_NK	3253	6861	99.1134	gi|327282536|ref|XP_003225998.1|	869.8	0	PREDICTED: protein ERGIC-53-like [Anolis carolinensis]
CL66.Contig2_NK	1998	4203	98.8537	gi|226372474|gb|ACO51862.1|	201.4	1e-49	Transposable element Tc1 transposase [Rana catesbeiana]
Unigene13796_NK	832	1744	98.5036	--	--	--	--
Unigene28916_NK	789	1652	98.3925	gi|449496701|ref|XP_002188099.2|	255.8	1e-66	PREDICTED: heterogeneous nuclear ribonucleoprotein U [Taeniopygia guttata]
Unigene6553_NK	3102	6475	98.0905	gi|327278625|ref|XP_003224061.1|	757.3	0	PREDICTED: polymeric immunoglobulin receptor-like [Anolis carolinensis]
Unigene14132_NK	276	576	98.0714	gi|410969636|ref|XP_003991299.1|	56.6	4e-07	PREDICTED: nucleolin [Felis catus]
Unigene31541_NK	743	1547	97.8431	--	--	--	--
Unigene23481_NK	300	624	97.7445	gi|449489249|ref|XP_002188220.2|	94.7	1e-18	PREDICTED: UDP-N-acetylglucosamine--dolichyl-phosphate N-acetylglucosaminephosphotransferase, partial [Taeniopygia guttata]
CL2895.Contig3_NK	1439	2993	97.7406	--	--	--	--
CL4243.Contig1_NK	257	534	97.6421	--	--	--	--
CL1406.Contig1_NK	243	503	97.2726	--	--	--	--
Unigene6594_NK	1948	4032	97.2659	gi|327290272|ref|XP_003229847.1|	1074.7	0	PREDICTED: e3 ubiquitin-protein ligase synoviolin-like [Anolis carolinensis]
Unigene25645_NK	1587	3284	97.2423	--	--	--	--
Unigene30685_NK	312	644	96.9974	gi|465967333|gb|EMP31337.1|	72.8	5e-12	Hepatoma-derived growth factor [Chelonia mydas]
Unigene30440_NK	1323	2728	96.8977	--	--	--	--
Unigene31555_NK	896	1846	96.8172	gi|465999856|gb|EMP41082.1|	244.6	4e-63	Phosphorylase b kinase gamma catalytic chain, skeletal muscle isoform [Chelonia mydas]
Unigene31618_NK	650	1339	96.8046	gi|327286584|ref|XP_003228010.1|	267.3	3e-70	PREDICTED: peptidyl-prolyl cis-trans isomerase FKBP2-like [Anolis carolinensis]
Unigene22123_NK	451	929	96.7984	gi|224045955|ref|XP_002192792.1|	150.2	2e-35	PREDICTED: endoplasmic reticulum resident protein 44 [Taeniopygia guttata]
Unigene31390_NK	305	627	96.6043	gi|156602023|gb|ABU86898.1|	85.5	8e-16	MHC class II antigen [Ornithorhynchus anatinus]
Unigene26643_NK	284	581	96.1361	gi|339233834|ref|XP_003382034.1|	144.4	1e-33	putative integrase core domain protein [Trichinella spiralis] >gi|316979059|gb|EFV61911.1| putative integrase core domain protein [Trichinella spiralis]
Unigene31343_NK	245	499	95.7113	--	--	--	--
Unigene29942_NK	220	448	95.6939	gi|283765944|gb|ADB28364.1|	88.2	1e-16	MHC class Ia1 antigen allele A [Meleagris gallopavo]
CL64.Contig1_NK	553	1125	95.5996	gi|327269294|ref|XP_003219429.1|	198	1e-49	PREDICTED: GTPase IMAP family member 2-like [Anolis carolinensis]
Unigene6554_NK	2424	4930	95.5748	gi|465957654|gb|EMP27501.1|	864.8	0	AP-2 complex subunit mu-1, partial [Chelonia mydas]
Unigene25920_NK	693	1408	95.4769	--	--	--	--
Unigene20463_NK	244	495	95.3332	--	--	--	--
Unigene31591_NK	477	964	94.9702	gi|51814327|gb|AAU09480.1|	112.1	9e-24	GekBS039P [Gekko japonicus]
Unigene31566_NK	1097	2212	94.7561	gi|327265577|ref|XP_003217584.1|	379	2e-103	PREDICTED: PRELI domain-containing protein 1, mitochondrial-like [Anolis carolinensis]
Unigene27123_NK	3515	7073	94.5599	gi|327259625|ref|XP_003214636.1|	860.5	0	PREDICTED: LOW QUALITY PROTEIN: cyclic AMP-responsive element-binding protein 3-like protein 1-like [Anolis carolinensis]
Unigene27928_NK	5022	10085	94.3687	gi|327272416|ref|XP_003220981.1|	2224.9	0	PREDICTED: myosin-9-like [Anolis carolinensis]
Unigene22621_NK	1829	3667	94.2163	gi|449504086|ref|XP_002197262.2|	994.6	0	PREDICTED: eukaryotic translation initiation factor 4 gamma 2 [Taeniopygia guttata]
Unigene22403_NK	1419	2841	94.0844	gi|327264274|ref|XP_003216939.1|	431.8	4e-119	PREDICTED: b-cell receptor-associated protein 31-like [Anolis carolinensis]
Unigene29526_NK	814	1626	93.8696	--	--	--	--
Unigene21534_NK	2055	4100	93.7564	gi|327270872|ref|XP_003220212.1|	543.9	1e-152	PREDICTED: transmembrane protein 59-like [Anolis carolinensis]
Unigene6490_NK	434	864	93.552	--	--	--	--
Unigene31615_NK	300	596	93.3585	gi|284413724|ref|NP_001165115.1|	190.3	2e-47	signal peptidase complex subunit 1 homolog [Gallus gallus] >gi|284413726|ref|NP_001165116.1| signal peptidase complex subunit 1 homolog [Gallus gallus]
Unigene29543_NK	351	695	93.0479	--	--	--	--
Unigene28281_NK	445	879	92.8235	gi|465990406|gb|EMP38366.1|	155.6	6e-37	Immunoglobulin iota chain [Chelonia mydas]
Unigene31590_NK	1064	2096	92.5718	gi|327277121|ref|XP_003223314.1|	396.7	1e-108	PREDICTED: mitochondrial import inner membrane translocase subunit Tim23-like [Anolis carolinensis]
Unigene25607_NK	288	567	92.5166	--	--	--	--
Unigene31588_NK	1783	3510	92.5091	gi|327286705|ref|XP_003228070.1|	750.4	0	PREDICTED: serine incorporator 2-like [Anolis carolinensis]
Unigene31613_NK	662	1301	92.3524	--	--	--	--
Unigene25694_NK	972	1909	92.293	--	--	--	--
Unigene25085_NK	1305	2559	92.1486	--	--	--	--
Unigene25693_NK	3325	6519	92.1336	gi|327282726|ref|XP_003226093.1|	1447.2	0	PREDICTED: eukaryotic translation initiation factor 3 subunit B-like [Anolis carolinensis]
Unigene31564_NK	1685	3297	91.9492	gi|327270763|ref|XP_003220158.1|	663.7	0	PREDICTED: endophilin-B1-like isoform 1 [Anolis carolinensis]
CL785.Contig3_NK	250	489	91.9174	gi|82193158|sp|Q53B55.1|NXL31_OPHHA	63.9	2e-09	RecName: Full=Long neurotoxin-like OH-31; Flags: Precursor >gi|51105379|gb|AAT97253.1| long chain neurotoxin-like protein [Ophiophagus hannah]
Unigene27991_NK	491	959	91.7838	--	--	--	--
CL61.Contig2_NK	1057	2064	91.7622	--	--	--	--
CL5531.Contig8_NK	291	568	91.7243	--	--	--	--
Unigene22130_NK	580	1131	91.6354	--	--	--	--
Unigene25219_NK	821	1600	91.5811	gi|465999460|ref|XP_004268100.1|	80.9	8e-14	PREDICTED: signal peptidase complex catalytic subunit SEC11C [Orcinus orca] >gi|470605899|ref|XP_004314017.1| PREDICTED: signal peptidase complex catalytic subunit SEC11C [Tursiops truncatus]
Unigene31578_NK	3333	6491	91.5177	gi|326912625|ref|XP_003202649.1|	699.9	0	PREDICTED: peptidyl-prolyl cis-trans isomerase FKBP4-like [Meleagris gallopavo]
Unigene6632_NK	1273	2479	91.5118	gi|444711073|gb|ELW52027.1|	389.4	2e-106	UBX domain-containing protein 1 [Tupaia chinensis]
CL3531.Contig1_NK	451	877	91.3802	gi|291410120|ref|XP_002721359.1|	96.7	3e-19	PREDICTED: hCG2041603-like [Oryctolagus cuniculus]
Unigene15282_NK	358	696	91.3598	gi|327273205|ref|XP_003221371.1|	224.9	8e-58	PREDICTED: neural Wiskott-Aldrich syndrome protein-like [Anolis carolinensis]
CL1177.Contig2_NK	444	863	91.3391	--	--	--	--
Unigene10188_NK	1079	2097	91.3284	gi|327285830|ref|XP_003227635.1|	480.7	5e-134	PREDICTED: UPF0568 protein C14orf166-like [Anolis carolinensis]
Unigene31608_NK	1229	2388	91.3085	gi|327283181|ref|XP_003226320.1|	448	4e-124	PREDICTED: GTP-binding nuclear protein Ran-like isoform 1 [Anolis carolinensis] >gi|327283183|ref|XP_003226321.1| PREDICTED: GTP-binding nuclear protein Ran-like isoform 2 [Anolis carolinensis]
CL1597.Contig2_NK	1757	3408	91.15	gi|301609203|ref|XP_002934174.1|	39.7	1e-94	PREDICTED: hypothetical protein LOC100494971 [Xenopus (Silurana) tropicalis]
Unigene8350_NK	689	1333	90.9159	gi|149463071|ref|XP_001514439.1|	253.8	5e-66	PREDICTED: DNA-directed RNA polymerases I, II, and III subunit RPABC2-like [Ornithorhynchus anatinus] >gi|327284940|ref|XP_003227193.1| PREDICTED: DNA-directed RNA polymerases I, II, and III subunit RPABC2-like [Anolis carolinensis]
Unigene15252_NK	618	1195	90.8674	gi|327262260|ref|XP_003215943.1|	250.4	4e-65	PREDICTED: ribonuclease T2-like [Anolis carolinensis]
Unigene19256_NK	548	1057	90.6407	--	--	--	--
Unigene22314_NK	1879	3624	90.6338	gi|327286930|ref|XP_003228182.1|	514.6	7e-144	PREDICTED: derlin-1-like isoform 1 [Anolis carolinensis]
Unigene31570_NK	1446	2786	90.5403	gi|465967573|gb|EMP31416.1|	522.7	1e-146	Ribosome biogenesis protein NSA2 like protein [Chelonia mydas]
CL257.Contig1_NK	210	404	90.4047	--	--	--	--
Unigene6915_NK	1994	3829	90.2379	gi|327280872|ref|XP_003225175.1|	939.9	0	PREDICTED: aldehyde dehydrogenase, mitochondrial-like [Anolis carolinensis]
CL3487.Contig4_NK	1277	2450	90.158	gi|2331059|gb|AAC60281.1|	55.1	9e-06	unknown [Gallus gallus]
Unigene13389_NK	232	445	90.1365	gi|326931068|ref|XP_003211658.1|	72.8	5e-12	PREDICTED: ATP synthase subunit d, mitochondrial-like [Meleagris gallopavo]
Unigene31595_NK	2572	4923	89.9472	gi|449269658|gb|EMC80410.1|	1342	0	Threonyl-tRNA synthetase, cytoplasmic, partial [Columba livia]
Unigene29058_NK	1588	3038	89.9013	gi|465960899|gb|EMP29119.1|	42.7	8e-11	hypothetical protein UY3_13774 [Chelonia mydas]
Unigene31640_NK	349	667	89.811	gi|351704763|gb|EHB07682.1|	52.4	7e-06	Immunoglobulin G-binding protein A, partial [Heterocephalus glaber]
Unigene26286_NK	257	491	89.7795	gi|300218775|gb|ADJ80991.1|	64.3	2e-09	CR1-3 [Lycodichthys dearborni]
Unigene48_NK	376	718	89.7357	--	--	--	--
Unigene31544_NK	1002	1913	89.7173	gi|334325296|ref|XP_001365370.2|	107.5	1e-21	PREDICTED: small EDRK-rich factor 1-like [Monodelphis domestica]
CL1151.Contig1_NK	1745	3328	89.6224	gi|359318839|ref|XP_003432729.2|	64.3	2e-08	PREDICTED: histone-lysine N-methyltransferase MLL4, partial [Canis lupus familiaris]
Unigene31581_NK	1872	3567	89.5419	gi|327264485|ref|XP_003217044.1|	961.4	0	PREDICTED: ATP synthase subunit beta, mitochondrial-like [Anolis carolinensis]
Unigene31551_NK	1734	3304	89.5406	gi|327290469|ref|XP_003229945.1|	839	0	PREDICTED: isocitrate dehydrogenase [NADP], mitochondrial-like [Anolis carolinensis]
Unigene25653_NK	211	402	89.5308	--	--	--	--
Unigene7825_NK	1970	3753	89.5244	gi|327283035|ref|XP_003226247.1|	787.3	0	PREDICTED: nucleobindin-1-like [Anolis carolinensis]
Unigene31264_NK	356	678	89.497	--	--	--	--
Unigene21129_NK	378	719	89.3853	--	--	--	--
Unigene27856_NK	457	869	89.3578	--	--	--	--
Unigene6635_NK	1574	2989	89.2381	gi|449282373|gb|EMC89217.1|	808.1	0	Eukaryotic translation initiation factor 2 subunit 3, partial [Columba livia]
Unigene31584_NK	1440	2729	89.0574	gi|215422358|ref|NP_001135862.1|	704.5	0	proteasome (prosome, macropain) 26S subunit, non-ATPase, 4 [Gallus gallus]
Unigene7754_NK	769	1456	88.9742	gi|111601559|gb|AAI19733.1|	210.3	7e-53	FKBP1A protein [Homo sapiens]
Unigene23428_NK	614	1162	88.9338	gi|327261054|ref|XP_003215347.1|	282.3	1e-74	PREDICTED: dnaJ homolog subfamily B member 9-like isoform 1 [Anolis carolinensis] >gi|327261056|ref|XP_003215348.1| PREDICTED: dnaJ homolog subfamily B member 9-like isoform 2 [Anolis carolinensis]
Unigene15264_NK	349	660	88.8684	gi|471360282|ref|XP_004370711.1|	98.2	1e-19	PREDICTED: ras GTPase-activating-like protein IQGAP1 [Trichechus manatus latirostris]
Unigene392_NK	1094	2068	88.8305	--	--	--	--
Unigene6604_NK	505	953	88.681	gi|350535731|ref|NP_001232443.1|	287.3	1e-76	putative peroxiredoxin 1 variant 3 [Taeniopygia guttata] >gi|197128343|gb|ACH44841.1| putative peroxiredoxin 1 variant 3 [Taeniopygia guttata]
Unigene31574_NK	915	1726	88.6438	gi|326928241|ref|XP_003210289.1|	219.6	1e-55	PREDICTED: UPF0467 protein C5orf32 homolog [Meleagris gallopavo]
Unigene26315_NK	891	1679	88.5527	gi|466003434|gb|EMP42094.1|	335.5	2e-90	Complement C1q subcomponent subunit B [Chelonia mydas]
Unigene6625_NK	1679	3153	88.2474	gi|327273688|ref|XP_003221612.1|	781.6	0	PREDICTED: multifunctional protein ADE2-like [Anolis carolinensis]
Unigene14260_NK	816	1532	88.2262	gi|239618555|gb|ACR83850.1|	290.4	6e-77	cystatin precursor [Naja kaouthia]
CL5424.Contig13_NK	242	454	88.1596	gi|408816336|dbj|BAM62877.1|	79.3	5e-14	L1-encoded reverse transcriptase-like protein [Trimeresurus flavoviridis]
Unigene38_NK	344	645	88.111	gi|4378025|gb|AAD19348.1|	100.1	3e-20	reverse transcriptase-like protein [Takifugu rubripes]
Unigene25656_NK	1435	2689	88.0578	gi|327276297|ref|XP_003222906.1|	434.1	8e-120	PREDICTED: intermediate conductance calcium-activated potassium channel protein 4-like [Anolis carolinensis]
Unigene24052_NK	481	901	88.0255	gi|471371164|ref|XP_004376090.1|	62.4	8e-09	PREDICTED: DNA-directed RNA polymerase II subunit RPB1 [Trichechus manatus latirostris]
Unigene13532_NK	536	999	87.585	gi|327276986|ref|XP_003223247.1|	252.7	6e-66	PREDICTED: ORM1-like protein 2-like [Anolis carolinensis]
Unigene20652_NK	343	639	87.5459	--	--	--	--
Unigene22339_NK	382	711	87.4652	--	--	--	--
Unigene7744_NK	1636	3042	87.3785	gi|363739241|ref|XP_003642145.1|	402.9	2e-110	PREDICTED: NEDD4 family-interacting protein 1-like [Gallus gallus] >gi|363739251|ref|XP_414658.3| PREDICTED: NEDD4 family-interacting protein 1 [Gallus gallus]
Unigene31593_NK	1187	2207	87.3737	gi|327288502|ref|XP_003228965.1|	652.1	0	PREDICTED: cationic amino acid transporter 3-like [Anolis carolinensis]
Unigene31629_NK	972	1805	87.2649	gi|466070441|ref|XP_004282303.1|	162.5	2e-38	PREDICTED: uncharacterized protein LOC101288017 [Orcinus orca]
Unigene31009_NK	2198	4079	87.2077	gi|327271395|ref|XP_003220473.1|	63.5	5e-08	PREDICTED: UPF0577 protein KIAA1324-like [Anolis carolinensis]
Unigene24370_NK	733	1360	87.1894	gi|327290955|ref|XP_003230187.1|	325.5	1e-87	PREDICTED: prenylated Rab acceptor protein 1-like [Anolis carolinensis]
Unigene24901_NK	2303	4262	86.9658	gi|327266794|ref|XP_003218189.1|	766.5	0	PREDICTED: translocation protein SEC62-like [Anolis carolinensis]
Unigene30196_NK	494	913	86.8506	--	--	--	--
Unigene29160_NK	544	1005	86.8153	gi|327274637|ref|XP_003222083.1|	70.1	5e-11	PREDICTED: heterogeneous nuclear ribonucleoproteins A2/B1-like [Anolis carolinensis]
Unigene31647_NK	410	757	86.7643	gi|327271499|ref|XP_003220525.1|	162.2	7e-39	PREDICTED: reactive oxygen species modulator 1-like [Anolis carolinensis]
CL4062.Contig1_NK	339	623	86.3609	--	--	--	--
Unigene31624_NK	927	1703	86.3304	gi|327286564|ref|XP_003228000.1|	393.3	9e-108	PREDICTED: proteasome subunit beta type-4-like [Anolis carolinensis]
Unigene6602_NK	485	890	86.2337	gi|432101167|gb|ELK29451.1|	54.7	1e-06	Cytochrome b-c1 complex subunit 10 [Myotis davidii]
Unigene777_NK	3984	7306	86.1766	gi|327280190|ref|XP_003224836.1|	750.7	0	PREDICTED: kunitz-type protease inhibitor 1-like [Anolis carolinensis]
CL511.Contig1_NK	1007	1842	85.9585	--	--	--	--
Unigene31602_NK	679	1242	85.9569	gi|50807217|ref|XP_424552.1|	102.4	1e-20	PREDICTED: 39S ribosomal protein L34, mitochondrial [Gallus gallus]
CL3493.Contig3_NK	2111	3857	85.8599	gi|224066373|ref|XP_002188184.1|	976.5	0	PREDICTED: inosine-5&apos;-monophosphate dehydrogenase 2 [Taeniopygia guttata]
CL2005.Contig1_NK	1541	2815	85.843	gi|281352122|gb|EFB27706.1|	57	3e-06	hypothetical protein PANDA_010928 [Ailuropoda melanoleuca]
CL3498.Contig1_NK	594	1082	85.5992	--	--	--	--
Unigene22079_NK	4611	8396	85.567	gi|327286801|ref|XP_003228118.1|	1452.2	0	PREDICTED: disintegrin and metalloproteinase domain-containing protein 10-like [Anolis carolinensis]
Unigene13669_NK	840	1526	85.3698	gi|440907831|gb|ELR57927.1|	395.6	1e-108	Ras-related protein Rab-1A, partial [Bos grunniens mutus]
Unigene15193_NK	1018	1849	85.3528	gi|327274220|ref|XP_003221876.1|	82	5e-14	PREDICTED: c-X-C motif chemokine 11-like [Anolis carolinensis]
CL3939.Contig6_NK	212	385	85.3402	gi|49022437|dbj|BAD23969.1|	89	7e-17	MHC class I antigen [Anas platyrhynchos]
Unigene29363_NK	250	454	85.3384	gi|390336705|ref|XP_001191426.2|	83.2	4e-15	PREDICTED: uncharacterized protein LOC755711 [Strongylocentrotus purpuratus]
Unigene31605_NK	484	878	85.2468	gi|118091656|ref|XP_421155.2|	153.7	2e-36	PREDICTED: transmembrane protein 87A-like [Gallus gallus]
Unigene14292_NK	1470	2663	85.13	gi|327281194|ref|XP_003225334.1|	839.7	0	PREDICTED: dolichyl-diphosphooligosaccharide--protein glycosyltransferase subunit 2-like [Anolis carolinensis]
Unigene26457_NK	266	481	84.9752	--	--	--	--
Unigene31594_NK	1098	1984	84.9118	--	--	--	--
Unigene1113_NK	2402	4340	84.9074	gi|224043699|ref|XP_002189079.1|	1125.5	0	PREDICTED: phosphatidylinositol-binding clathrin assembly protein isoform 1 [Taeniopygia guttata]
Unigene31599_NK	802	1448	84.8444	gi|327280941|ref|XP_003225209.1|	139.8	1e-31	PREDICTED: CD59 glycoprotein-like [Anolis carolinensis]
Unigene20556_NK	1387	2504	84.8373	gi|327275015|ref|XP_003222269.1|	60.5	2e-07	PREDICTED: protein disulfide-isomerase A4-like [Anolis carolinensis]
Unigene15297_NK	908	1636	84.6694	gi|327283929|ref|XP_003226692.1|	56.2	2e-06	PREDICTED: eukaryotic translation initiation factor 3 subunit A-like [Anolis carolinensis]
Unigene22204_NK	2128	3833	84.644	gi|449273152|gb|EMC82760.1|	341.7	9e-92	Cbp/p300-interacting transactivator 2 [Columba livia]
Unigene30586_NK	397	715	84.6339	gi|197128013|gb|ACH44511.1|	206.1	4e-52	putative RIKEN cDNA 2310005N01 variant 1 [Taeniopygia guttata]
Unigene10587_NK	1513	2724	84.6052	gi|327263385|ref|XP_003216500.1|	619.8	1e-175	PREDICTED: fructose-1,6-bisphosphatase 1-like [Anolis carolinensis]
CL96.Contig3_NK	214	385	84.5426	--	--	--	--
Unigene30728_NK	412	739	84.29	--	--	--	--
CL3932.Contig2_NK	353	633	84.2671	gi|471368189|ref|XP_004374621.1|	183.3	2e-45	PREDICTED: 40S ribosomal protein S23 [Trichechus manatus latirostris]
CL1885.Contig1_NK	3225	5781	84.2369	gi|449488794|ref|XP_002188731.2|	167.2	5e-39	PREDICTED: LOW QUALITY PROTEIN: uncharacterized protein LOC100231405 [Taeniopygia guttata]
Unigene679_NK	907	1622	84.0374	gi|327261177|ref|XP_003215408.1|	126.7	1e-27	PREDICTED: CD2-associated protein-like [Anolis carolinensis]
Unigene30142_NK	1485	2654	83.9853	gi|211926750|dbj|BAG82599.1|	753.4	0	aminopeptidase N [Gloydius brevicaudus]
CL66.Contig4_NK	361	645	83.9617	--	--	--	--
Unigene29750_NK	470	837	83.6867	--	--	--	--
Unigene31550_NK	1221	2171	83.5551	--	--	--	--
Unigene23960_NK	2694	4787	83.5016	gi|348517548|ref|XP_003446295.1|	402.9	4e-110	PREDICTED: ras-related protein Rab-10-like [Oreochromis niloticus]
CL2927.Contig2_NK	402	713	83.3475	gi|283464201|gb|ADB22684.1|	174.5	1e-42	lambda immunoglobulin light chain [Anolis carolinensis]
Unigene9660_NK	1178	2089	83.334	gi|327259323|ref|XP_003214487.1|	383.6	1e-104	PREDICTED: transmembrane emp24 domain-containing protein 10-like [Anolis carolinensis]
Unigene17718_NK	805	1427	83.3023	gi|327289111|ref|XP_003229268.1|	393.7	5e-108	PREDICTED: proteasome subunit beta type-2-like [Anolis carolinensis]
Unigene20437_NK	1560	2765	83.2913	gi|449265976|gb|EMC77103.1|	1043.5	0	Pre-mRNA-processing-splicing factor 8, partial [Columba livia]
Unigene13458_NK	2429	4305	83.2865	gi|327278082|ref|XP_003223791.1|	1174.1	0	PREDICTED: complement C1r subcomponent-like [Anolis carolinensis]
Unigene6609_NK	434	769	83.2656	gi|61098232|ref|NP_001012789.1|	150.2	2e-35	eukaryotic translation initiation factor 3 subunit J [Gallus gallus] >gi|82082038|sp|Q5ZKA4.1|EIF3J_CHICK RecName: Full=Eukaryotic translation initiation factor 3 subunit J; Short=eIF3j; AltName: Full=Eukaryotic translation initiation factor 3 subunit 1; AltName: Full=eIF-3-alpha; AltName: Full=eIF3 p35
Unigene15203_NK	472	832	82.8343	--	--	--	--
Unigene24582_NK	2332	4110	82.8213	gi|327289501|ref|XP_003229463.1|	951	0	PREDICTED: LOW QUALITY PROTEIN: cadherin-1-like, partial [Anolis carolinensis]
Unigene31597_NK	1915	3375	82.8197	gi|327291570|ref|XP_003230494.1|	292.7	4e-77	PREDICTED: actin-related protein 2/3 complex subunit 5-like [Anolis carolinensis]
Unigene13471_NK	1106	1944	82.5981	gi|327286546|ref|XP_003227991.1|	397.1	8e-109	PREDICTED: PIN2/TERF1-interacting telomerase inhibitor 1-like [Anolis carolinensis]
Unigene24144_NK	1324	2326	82.5564	gi|67464143|pdb|1T91|A	77	2e-12	Chain A, Crystal Structure Of Human Small Gtpase Rab7(Gtp) >gi|67464144|pdb|1T91|B Chain B, Crystal Structure Of Human Small Gtpase Rab7(Gtp) >gi|67464145|pdb|1T91|C Chain C, Crystal Structure Of Human Small Gtpase Rab7(Gtp) >gi|67464146|pdb|1T91|D Chain D, Crystal Structure Of Human Small Gtpase Rab7(Gtp) >gi|67464282|pdb|1YHN|A Chain A, Structure Basis Of Rilp Recruitment By Rab7
Unigene26764_NK	556	976	82.4905	gi|327261222|ref|XP_003215430.1|	379.4	4e-104	PREDICTED: grainyhead-like protein 1 homolog [Anolis carolinensis]
Unigene29044_NK	7174	12552	82.2206	gi|327282730|ref|XP_003226095.1|	827	0	PREDICTED: protein tweety homolog 3-like [Anolis carolinensis]
Unigene15639_NK	594	1039	82.1974	gi|49659864|gb|AAT68231.1|	159.5	9e-38	GekBS029P [Gekko japonicus] >gi|50881972|gb|AAT85561.1| BS010P [Gekko japonicus]
Unigene6600_NK	828	1437	81.5559	--	--	--	--
Unigene31137_NK	2742	4757	81.5257	gi|449499923|ref|XP_004175397.1|	1392.9	0	PREDICTED: LOW QUALITY PROTEIN: protein transport protein Sec31A [Taeniopygia guttata]
Unigene6596_NK	833	1444	81.4613	--	--	--	--
Unigene25505_NK	3812	6606	81.4356	gi|327276851|ref|XP_003223180.1|	1194.9	0	PREDICTED: transmembrane 9 superfamily member 3-like [Anolis carolinensis]
Unigene31609_NK	782	1355	81.4257	gi|194212738|ref|XP_001501010.2|	206.8	9e-52	PREDICTED: tetratricopeptide repeat protein 36-like [Equus caballus]
Unigene29830_NK	2066	3571	81.2248	--	--	--	--
Unigene31670_NK	238	411	81.151	--	--	--	--
Unigene28204_NK	1855	3199	81.04	gi|327261177|ref|XP_003215408.1|	97.8	2e-18	PREDICTED: CD2-associated protein-like [Anolis carolinensis]
CL167.Contig1_NK	489	843	81.0117	gi|327271319|ref|XP_003220435.1|	101.7	1e-20	PREDICTED: UHRF1-binding protein 1-like [Anolis carolinensis]
CL4574.Contig15_NK	369	636	80.9953	--	--	--	--
Unigene20163_NK	513	884	80.9774	--	--	--	--
Unigene28802_NK	1573	2710	80.9598	gi|327274369|ref|XP_003221950.1|	476.1	2e-132	PREDICTED: Golgi reassembly-stacking protein 1-like [Anolis carolinensis]
Unigene14210_NK	1080	1858	80.8446	gi|225542810|gb|ACN91288.1|	58.5	6e-07	dentin sialophosphoprotein precursor [Lemur catta]
Unigene15386_NK	1877	3226	80.7661	gi|465951096|gb|EMP24115.1|	168.3	1e-39	Plasmalemma vesicle-associated protein [Chelonia mydas]
Unigene31196_NK	614	1054	80.668	--	--	--	--
Unigene22132_NK	229	393	80.6466	--	--	--	--
Unigene13594_NK	926	1586	80.4861	gi|465979200|gb|EMP35185.1|	233.4	1e-59	Protein CNPPD1 [Chelonia mydas]
Unigene26525_NK	295	504	80.2856	--	--	--	--
Unigene29904_NK	1365	2331	80.2488	gi|55732943|emb|CAH93159.1|	547.7	5e-154	hypothetical protein [Pongo abelii]
Unigene20098_NK	388	662	80.178	gi|47220009|emb|CAG11542.1|	176	4e-43	unnamed protein product [Tetraodon nigroviridis]
Unigene27364_NK	807	1375	80.0678	--	--	--	--
Unigene31620_NK	372	633	79.9631	gi|5453640|ref|NP_006295.1|	148.7	8e-35	26S proteasome complex subunit DSS1 [Homo sapiens] >gi|6677941|ref|NP_033195.1| 26S proteasome complex subunit DSS1 [Mus musculus] >gi|164519014|ref|NP_001106788.1| 26S proteasome complex subunit DSS1 [Bos taurus] >gi|186910257|ref|NP_001119562.1| 26S proteasome complex subunit DSS1 [Rattus norvegicus] >gi|388453069|ref|NP_001253734.1| 26S proteasome complex subunit DSS1 [Macaca mulatta] >gi|4639…
Unigene20224_NK	863	1468	79.9363	--	--	--	--
CL3939.Contig7_NK	1604	2726	79.8639	gi|188501719|gb|ACD54828.1|	403.3	1e-110	MHC class I antigen [Amblyrhynchus cristatus]
Unigene26509_NK	1307	2214	79.6033	gi|327266668|ref|XP_003218126.1|	411.8	4e-113	PREDICTED: vesicle-trafficking protein SEC22b-like [Anolis carolinensis]
Unigene758_NK	264	447	79.5669	gi|4378025|gb|AAD19348.1|	61.6	1e-08	reverse transcriptase-like protein [Takifugu rubripes]
Unigene29366_NK	891	1506	79.4285	gi|444727283|gb|ELW67784.1|	342	2e-92	BAI1-associated protein 3 [Tupaia chinensis]
Unigene23979_NK	2892	4884	79.3608	gi|327285782|ref|XP_003227611.1|	807.4	0	PREDICTED: adenylyl cyclase-associated protein 1-like [Anolis carolinensis]
Unigene30798_NK	723	1221	79.3608	--	--	--	--
Unigene6552_NK	515	869	79.2942	--	--	--	--
Unigene20947_NK	2967	5006	79.287	gi|116243063|sp|Q0GNE0.1|CISY_IGUIG	927.2	0	RecName: Full=Citrate synthase, mitochondrial; Flags: Precursor >gi|112791217|gb|ABI21882.1| citrate synthase [Iguana iguana]
Unigene10479_NK	559	943	79.2736	--	--	--	--
Unigene7753_NK	699	1178	79.1949	--	--	--	--
Unigene21889_NK	2353	3964	79.1663	gi|327272356|ref|XP_003220951.1|	261.2	1e-67	PREDICTED: endoplasmin-like [Anolis carolinensis]
Unigene6634_NK	1645	2767	79.0446	gi|327269795|ref|XP_003219678.1|	533.5	1e-149	PREDICTED: syntenin-1-like isoform 1 [Anolis carolinensis]
Unigene31233_NK	261	439	79.0411	--	--	--	--
CL3160.Contig2_NK	817	1373	78.9728	gi|327272988|ref|XP_003221265.1|	450.3	5e-125	PREDICTED: f-actin-capping protein subunit alpha-2-like [Anolis carolinensis]
Unigene29737_NK	1168	1960	78.8573	gi|351697426|gb|EHB00345.1|	397.5	6e-109	Protein RER1 [Heterocephalus glaber]
Unigene24339_NK	1320	2215	78.8549	gi|297682633|ref|XP_002819017.1|	650.6	0	PREDICTED: serine/threonine-protein phosphatase 2A catalytic subunit beta isoform isoform 1 [Pongo abelii] >gi|395739560|ref|XP_003777280.1| PREDICTED: serine/threonine-protein phosphatase 2A catalytic subunit beta isoform isoform 2 [Pongo abelii]
Unigene23793_NK	2810	4715	78.8505	gi|148224158|ref|NP_001084140.1|	702.2	0	guanine nucleotide-binding protein G(I)/G(S)/G(T) subunit beta-1 [Xenopus laevis] >gi|54261466|gb|AAH84263.1| XGbeta1 protein [Xenopus laevis]
Unigene25598_NK	269	451	78.7867	--	--	--	--
Unigene27954_NK	2641	4426	78.7539	gi|327278100|ref|XP_003223800.1|	682.6	0	PREDICTED: UV excision repair protein RAD23 homolog B-like [Anolis carolinensis]
Unigene23808_NK	1257	2105	78.6947	gi|327266031|ref|XP_003217810.1|	523.9	7e-147	PREDICTED: coatomer subunit gamma-like [Anolis carolinensis]
Unigene24509_NK	1186	1986	78.6907	--	--	--	--
Unigene22248_NK	1028	1720	78.6256	--	--	--	--
Unigene15352_NK	294	491	78.4807	--	--	--	--
CL662.Contig1_NK	1508	2518	78.4663	--	--	--	--
Unigene15697_NK	1161	1935	78.3209	gi|327263703|ref|XP_003216657.1|	527.3	5e-148	PREDICTED: regulator of differentiation 1-like [Anolis carolinensis]
Unigene25220_NK	638	1061	78.149	--	--	--	--
Unigene31636_NK	1375	2284	78.0589	gi|327279906|ref|XP_003224696.1|	588.6	2e-166	PREDICTED: beta-1,4-galactosyltransferase 1-like [Anolis carolinensis]
Unigene26301_NK	771	1280	78.0161	gi|327278232|ref|XP_003223866.1|	64.7	5e-09	PREDICTED: hypothetical protein LOC100556650 [Anolis carolinensis]
Unigene31621_NK	803	1333	78.0088	gi|187373263|gb|ACD03295.1|	114.8	4e-24	ISG15 ubiquitin-like modifier [Sus scrofa]
Unigene15354_NK	1497	2481	77.8814	gi|384254937|gb|AFH75303.1|	190.3	2e-46	DMA [Lyrurus tetrix]
Unigene6493_NK	1478	2449	77.8652	gi|326931320|ref|XP_003211780.1|	734.2	0	PREDICTED: t-complex protein 1 subunit zeta-like, partial [Meleagris gallopavo]
Unigene1134_NK	2137	3539	77.8225	gi|224054708|ref|XP_002192499.1|	798.9	0	PREDICTED: myc box-dependent-interacting protein 1 isoform 1 [Taeniopygia guttata]
Unigene20940_NK	634	1048	77.6785	gi|327264291|ref|XP_003216947.1|	355.1	1e-96	PREDICTED: n-alpha-acetyltransferase 10, NatA catalytic subunit-like [Anolis carolinensis]
Unigene15388_NK	399	659	77.6142	--	--	--	--
Unigene31586_NK	1679	2773	77.6119	--	--	--	--
Unigene31562_NK	1208	1994	77.5688	gi|197129946|gb|ACH46444.1|	269.2	2e-70	putative IscU iron-sulfur cluster scaffold variant 2 [Taeniopygia guttata]
Unigene8251_NK	1669	2750	77.4293	gi|327288018|ref|XP_003228725.1|	446.4	2e-123	PREDICTED: acidic leucine-rich nuclear phosphoprotein 32 family member E-like isoform 1 [Anolis carolinensis]
Unigene30524_NK	855	1407	77.3316	--	--	--	--
Unigene17123_NK	463	761	77.2383	gi|327288620|ref|XP_003229024.1|	174.9	1e-42	PREDICTED: ATP synthase subunit g, mitochondrial-like [Anolis carolinensis]
Unigene1131_NK	2126	3493	77.2083	gi|327263983|ref|XP_003216796.1|	905.6	0	PREDICTED: tubulin beta-4 chain-like [Anolis carolinensis]
Unigene6489_NK	249	409	77.1885	--	--	--	--
CL1832.Contig1_NK	200	328	77.0678	gi|327278653|ref|XP_003224075.1|	55.5	9e-07	PREDICTED: complement decay-accelerating factor-like [Anolis carolinensis]
Unigene25666_NK	1230	2017	77.0601	gi|12847552|dbj|BAB27616.1|	38.1	1e-72	unnamed protein product [Mus musculus]
Unigene29837_NK	208	341	77.0406	--	--	--	--
CL3455.Contig2_NK	2052	3363	77.0155	gi|327263225|ref|XP_003216421.1|	1014.2	0	PREDICTED: RNA polymerase II elongation factor ELL2-like [Anolis carolinensis]
CL3939.Contig12_NK	1617	2650	77.0131	gi|188501719|gb|ACD54828.1|	403.3	1e-110	MHC class I antigen [Amblyrhynchus cristatus]
Unigene20258_NK	368	603	77.0014	--	--	--	--
Unigene23735_NK	1748	2860	76.8871	gi|363737852|ref|XP_001233495.2|	298.1	9e-79	PREDICTED: calcium and integrin-binding protein 1 [Gallus gallus]
Unigene13486_NK	4197	6856	76.7646	gi|327260450|ref|XP_003215047.1|	1429.1	0	PREDICTED: oxysterol-binding protein 1-like [Anolis carolinensis]
Unigene27992_NK	778	1269	76.6498	--	--	--	--
CL5643.Contig2_NK	657	1071	76.6043	gi|327286138|ref|XP_003227788.1|	32.7	1e-09	PREDICTED: zinc finger protein 224-like, partial [Anolis carolinensis]
Unigene13563_NK	2025	3300	76.5804	gi|327280292|ref|XP_003224886.1|	954.9	0	PREDICTED: cyclin-K-like [Anolis carolinensis]
Unigene29132_NK	377	614	76.5343	gi|327259146|ref|XP_003214399.1|	184.1	1e-45	PREDICTED: tandem C2 domains nuclear protein-like [Anolis carolinensis]
Unigene26750_NK	495	806	76.5171	gi|327272896|ref|XP_003221220.1|	61.2	2e-08	PREDICTED: heterogeneous nuclear ribonucleoprotein D-like [Anolis carolinensis]
CL2895.Contig2_NK	1923	3131	76.5125	--	--	--	--
Unigene28945_NK	870	1416	76.4844	--	--	--	--
Unigene20793_NK	1210	1965	76.3143	gi|354491741|ref|XP_003508013.1|	485	3e-135	PREDICTED: annexin A4-like isoform 1 [Cricetulus griseus] >gi|354491743|ref|XP_003508014.1| PREDICTED: annexin A4-like isoform 2 [Cricetulus griseus]
Unigene31651_NK	891	1445	76.2112	gi|327288266|ref|XP_003228849.1|	330.9	5e-89	PREDICTED: 28 kDa heat- and acid-stable phosphoprotein-like [Anolis carolinensis]
Unigene13615_NK	1129	1829	76.1287	gi|119615680|gb|EAW95274.1|	119	4e-25	hCG2040005 [Homo sapiens]
Unigene31611_NK	1235	2000	76.1013	gi|327288084|ref|XP_003228758.1|	655.6	0	PREDICTED: eukaryotic translation initiation factor 3 subunit I-like [Anolis carolinensis]
Unigene28851_NK	850	1376	76.0726	gi|403267085|ref|XP_003925682.1|	33.1	8e-06	PREDICTED: ras-associated and pleckstrin homology domains-containing protein 1 [Saimiri boliviensis boliviensis]
Unigene14224_NK	2189	3542	76.0382	gi|465999553|gb|EMP40946.1|	630.6	1e-178	Zinc finger protein 36, C3H1 type-like 1 [Chelonia mydas]
Unigene31610_NK	1508	2433	75.8175	gi|465990833|gb|EMP38485.1|	193	3e-47	hypothetical protein UY3_04269 [Chelonia mydas]
Unigene24903_NK	1266	2040	75.7226	gi|465958573|gb|EMP27950.1|	669.5	0	LAG1 longevity assurance like protein 2 [Chelonia mydas]
Unigene13833_NK	2549	4101	75.6047	gi|327287320|ref|XP_003228377.1|	265	1e-68	PREDICTED: v-type proton ATPase 16 kDa proteolipid subunit-like [Anolis carolinensis]
Unigene937_NK	868	1393	75.4154	--	--	--	--
Unigene31666_NK	286	458	75.2538	--	--	--	--
Unigene6613_NK	3829	6125	75.1709	gi|334327112|ref|XP_001363869.2|	1967.2	0	PREDICTED: sarcoplasmic/endoplasmic reticulum calcium ATPase 2-like [Monodelphis domestica]
Unigene15367_NK	754	1206	75.1631	--	--	--	--
Unigene20162_NK	354	566	75.135	--	--	--	--
Unigene23366_NK	1225	1957	75.073	--	--	--	--
CL2364.Contig2_NK	2613	4174	75.0658	gi|327280592|ref|XP_003225036.1|	930.2	0	PREDICTED: CCR4-NOT transcription complex subunit 3-like [Anolis carolinensis]
CL5654.Contig1_NK	250	399	75.0001	--	--	--	--
Unigene23519_NK	339	541	74.994	--	--	--	--
Unigene13821_NK	2089	3333	74.9766	gi|327263762|ref|XP_003216686.1|	340.9	1e-91	PREDICTED: DAZ-associated protein 2-like isoform 1 [Anolis carolinensis]
Unigene30499_NK	691	1100	74.8072	--	--	--	--
Unigene24569_NK	218	347	74.8	--	--	--	--
Unigene9901_NK	2140	3406	74.7928	gi|327260572|ref|XP_003215108.1|	663.7	0	PREDICTED: gap junction gamma-1 protein-like [Anolis carolinensis]
Unigene29757_NK	577	916	74.6017	--	--	--	--
Unigene1122_NK	2430	3856	74.5692	gi|327288724|ref|XP_003229076.1|	360.1	3e-97	PREDICTED: induced myeloid leukemia cell differentiation protein Mcl-1 homolog [Anolis carolinensis]
Unigene6598_NK	1209	1918	74.5506	gi|20067631|emb|CAC83780.1|	789.3	0	phosphoglucose isomerase [Boiga kraepelini]
Unigene13677_NK	654	1037	74.5126	gi|147901416|ref|NP_001090500.1|	287.7	2e-76	uncharacterized protein LOC779413 [Xenopus laevis] >gi|116063424|gb|AAI23358.1| MGC154858 protein [Xenopus laevis]
Unigene13482_NK	800	1268	74.4832	gi|327267903|ref|XP_003218738.1|	436	9e-121	PREDICTED: NEDD4 family-interacting protein 2-like isoform 1 [Anolis carolinensis]
Unigene25039_NK	565	895	74.4395	gi|327270170|ref|XP_003219863.1|	250.4	3e-65	PREDICTED: cleft lip and palate transmembrane protein 1-like protein-like [Anolis carolinensis]
Unigene23261_NK	727	1150	74.3348	gi|148222280|ref|NP_001085215.1|	190.3	7e-47	SGT1, suppressor of G2 allele of SKP1 [Xenopus laevis] >gi|47937546|gb|AAH72118.1| MGC79143 protein [Xenopus laevis]
Unigene25362_NK	702	1110	74.3044	gi|426235322|ref|XP_004011633.1|	110.5	7e-23	PREDICTED: protein tyrosine phosphatase type IVA 1-like isoform 2 [Ovis aries]
Unigene22471_NK	1581	2499	74.2785	gi|338855272|gb|AEJ31965.1|	724.9	0	cysteine-rich with EGF-like domain [Crotalus adamanteus]
Unigene13670_NK	1075	1698	74.2264	--	--	--	--
Unigene6612_NK	801	1261	73.9795	gi|327259913|ref|XP_003214780.1|	332.4	1e-89	PREDICTED: transmembrane protein 9B-like [Anolis carolinensis]
Unigene31600_NK	996	1567	73.933	gi|327271415|ref|XP_003220483.1|	356.3	1e-96	PREDICTED: ATP synthase subunit b, mitochondrial-like isoform 1 [Anolis carolinensis]
Unigene30893_NK	1068	1679	73.8768	gi|465953789|gb|EMP25546.1|	134.4	9e-30	GTPase IMAP family member 2 [Chelonia mydas]
Unigene31638_NK	1156	1817	73.8628	gi|327284213|ref|XP_003226833.1|	627.9	3e-178	PREDICTED: eukaryotic translation initiation factor 3 subunit G-like [Anolis carolinensis]
Unigene1038_NK	1630	2557	73.7177	gi|327268668|ref|XP_003219118.1|	683.7	0	PREDICTED: e3 ubiquitin-protein ligase listerin-like isoform 2 [Anolis carolinensis]
Unigene31616_NK	380	596	73.7041	gi|327288847|ref|XP_003229136.1|	140.2	2e-32	PREDICTED: 28S ribosomal protein S21, mitochondrial-like [Anolis carolinensis]
Unigene6591_NK	4300	6735	73.6034	gi|327286598|ref|XP_003228017.1|	1181	0	PREDICTED: niban-like protein 1-like [Anolis carolinensis]
CL971.Contig1_NK	818	1279	73.4761	--	--	--	--
Unigene15387_NK	266	415	73.3154	--	--	--	--
Unigene31572_NK	1644	2564	73.2901	gi|327271477|ref|XP_003220514.1|	917.9	0	PREDICTED: tubulin alpha-1C chain-like [Anolis carolinensis]
Unigene26640_NK	2173	3389	73.2893	gi|327278669|ref|XP_003224083.1|	218.4	1e-54	PREDICTED: heat shock 70 kDa protein 13-like [Anolis carolinensis]
CL483.Contig2_NK	318	495	73.1488	gi|301607526|ref|XP_002933359.1|	41.2	4e-17	PREDICTED: uncharacterized protein K02A2.6-like [Xenopus (Silurana) tropicalis]
Unigene30800_NK	606	943	73.1253	--	--	--	--
Unigene31627_NK	1262	1958	72.9092	gi|327277629|ref|XP_003223566.1|	416.4	1e-114	PREDICTED: CCAAT/enhancer-binding protein delta-like [Anolis carolinensis]
Unigene7968_NK	514	797	72.8659	--	--	--	--
Unigene14120_NK	3011	4668	72.8533	gi|327265526|ref|XP_003217559.1|	509.2	5e-142	PREDICTED: heterogeneous nuclear ribonucleoprotein A/B-like [Anolis carolinensis]
Unigene27236_NK	1330	2061	72.8208	gi|327276873|ref|XP_003223191.1|	646.4	0	PREDICTED: adenosine kinase-like [Anolis carolinensis]
Unigene26459_NK	2356	3648	72.7626	--	--	--	--
Unigene21153_NK	422	653	72.7159	gi|2331059|gb|AAC60281.1|	39.3	2e-09	unknown [Gallus gallus]
CL4110.Contig9_NK	439	679	72.6832	--	--	--	--
Unigene23809_NK	225	348	72.6818	--	--	--	--
CL5533.Contig1_NK	1169	1806	72.5992	gi|390341000|ref|XP_003725351.1|	106.3	3e-21	PREDICTED: uncharacterized protein LOC100892248 [Strongylocentrotus purpuratus]
Unigene15250_NK	2297	3547	72.5653	gi|465973224|gb|EMP33330.1|	1011.5	0	Lysyl-tRNA synthetase, partial [Chelonia mydas]
Unigene27101_NK	486	750	72.5193	--	--	--	--
Unigene6636_NK	2081	3211	72.5099	gi|71897173|ref|NP_001026577.1|	569.7	2e-160	STIP1 homology and U box-containing protein 1 [Gallus gallus] >gi|78099172|sp|Q5ZHY5.1|STUB1_CHICK RecName: Full=STIP1 homology and U box-containing protein 1
Unigene27074_NK	362	558	72.436	gi|465957250|gb|EMP27311.1|	210.7	1e-53	Transmembrane protein 63C [Chelonia mydas]
Unigene28560_NK	1720	2651	72.4286	gi|465958139|gb|EMP27735.1|	695.3	0	Eukaryotic translation initiation factor 4 gamma 1 [Chelonia mydas]
Unigene30875_NK	989	1521	72.2706	--	--	--	--
Unigene62_NK	950	1459	72.1706	gi|327284385|ref|XP_003226918.1|	377.1	7e-103	PREDICTED: vacuolar protein sorting-associated protein 29-like isoform 2 [Anolis carolinensis]
Unigene15506_NK	1283	1969	72.1187	gi|327260792|ref|XP_003215217.1|	55.5	7e-06	PREDICTED: basic leucine zipper and W2 domain-containing protein 1-like [Anolis carolinensis]
Unigene27793_NK	684	1049	72.069	gi|223587758|emb|CAR82249.1|	57.4	6e-07	hypothetical protein [Cotesia congregata]
Unigene28925_NK	210	322	72.0552	--	--	--	--
Unigene29579_NK	1079	1654	72.0349	--	--	--	--
Unigene23697_NK	1688	2586	71.9921	gi|327264786|ref|XP_003217192.1|	891.3	0	PREDICTED: neurogenic locus notch homolog protein 2-like [Anolis carolinensis]
Unigene13671_NK	2905	4445	71.9042	gi|465960469|gb|EMP28886.1|	1177.5	0	NADPH--cytochrome P450 reductase [Chelonia mydas]
Unigene31658_NK	748	1144	71.8709	gi|432948750|ref|XP_004084152.1|	223.8	6e-57	PREDICTED: UPF0368 protein Cxorf26-like [Oryzias latipes]
Unigene31606_NK	2039	3118	71.8601	gi|71897255|ref|NP_001026559.1|	837.8	0	nucleolar protein 56 [Gallus gallus]
Unigene23561_NK	815	1246	71.8438	gi|118575167|sp|Q27J49.1|BNP_LACMU	198.7	2e-49	RecName: Full=Bradykinin-potentiating and C-type natriuretic peptides; AltName: Full=BPP-CNP; Contains: RecName: Full=Bradykinin-potentiating peptide 1; Short=BPP 1; Contains: RecName: Full=Bradykinin-potentiating peptide 2; Short=BPP 2; Contains: RecName: Full=Bradykinin-potentiating peptide 3; Short=BPP 3; Contains: RecName: Full=Bradykinin-potentiating peptide 4; Short=BPP 4; Contains: RecName…
Unigene12550_NK	1005	1532	71.6344	gi|149473178|ref|XP_001511415.1|	230.3	1e-58	PREDICTED: transcription elongation factor B polypeptide 2-like [Ornithorhynchus anatinus]
Unigene23453_NK	5028	7647	71.4702	gi|327287718|ref|XP_003228575.1|	1784.6	0	PREDICTED: alpha-actinin-4-like isoform 1 [Anolis carolinensis]
Unigene831_NK	778	1183	71.4552	--	--	--	--
CL3939.Contig14_NK	1562	2374	71.4214	gi|188501719|gb|ACD54828.1|	414.5	8e-114	MHC class I antigen [Amblyrhynchus cristatus]
Unigene68_NK	1585	2408	71.3931	gi|465958462|gb|EMP27900.1|	35	8e-38	Ubiquitin-conjugating enzyme E2 L3 [Chelonia mydas]
Unigene24580_NK	326	495	71.3537	gi|327289501|ref|XP_003229463.1|	214.5	1e-54	PREDICTED: LOW QUALITY PROTEIN: cadherin-1-like, partial [Anolis carolinensis]
Unigene30208_NK	409	621	71.3505	--	--	--	--
Unigene29436_NK	508	771	71.3213	--	--	--	--
Unigene13678_NK	325	493	71.2841	gi|327284704|ref|XP_003227076.1|	126.7	3e-28	PREDICTED: cytochrome b-c1 complex subunit Rieske, mitochondrial-like [Anolis carolinensis]
Unigene31575_NK	858	1301	71.2556	--	--	--	--
Unigene28461_NK	1913	2899	71.2135	--	--	--	--
CL3521.Contig3_NK	359	544	71.2087	gi|6576738|dbj|BAA88337.1|	116.3	4e-25	ORF2 [Acanthochelys spixii]
Unigene25595_NK	353	534	71.0879	--	--	--	--
Unigene577_NK	933	1411	71.068	gi|354472544|ref|XP_003498498.1|	165.6	3e-39	PREDICTED: 2&apos;-5&apos;-oligoadenylate synthase 1A-like [Cricetulus griseus]
Unigene30932_NK	3175	4801	71.0586	gi|327290118|ref|XP_003229771.1|	328.9	1e-87	PREDICTED: high affinity copper uptake protein 1-like isoform 1 [Anolis carolinensis] >gi|327290120|ref|XP_003229772.1| PREDICTED: high affinity copper uptake protein 1-like isoform 2 [Anolis carolinensis]
Unigene20299_NK	429	648	70.9817	--	--	--	--
Unigene15251_NK	461	695	70.8456	gi|449496874|ref|XP_004176401.1|	152.1	7e-36	PREDICTED: ribonuclease T2 [Taeniopygia guttata]
Unigene24017_NK	1130	1700	70.6967	--	--	--	--
Unigene31603_NK	1910	2872	70.661	gi|327277111|ref|XP_003223309.1|	1031.5	0	PREDICTED: glutamate dehydrogenase 1, mitochondrial-like [Anolis carolinensis]
Unigene20450_NK	1381	2075	70.6079	gi|327272432|ref|XP_003220989.1|	531.6	3e-149	PREDICTED: 3-mercaptopyruvate sulfurtransferase-like isoform 2 [Anolis carolinensis]
Unigene24842_NK	2301	3457	70.6011	gi|327259687|ref|XP_003214667.1|	670.6	0	PREDICTED: lysosomal acid phosphatase-like [Anolis carolinensis]
CL3606.Contig1_NK	2539	3809	70.4981	gi|465952610|gb|EMP24988.1|	75.1	2e-11	Intercellular adhesion molecule 5 [Chelonia mydas]
Unigene20537_NK	1362	2043	70.4888	gi|327284479|ref|XP_003226965.1|	532.3	2e-149	PREDICTED: 26S proteasome non-ATPase regulatory subunit 8-like [Anolis carolinensis]
CL4110.Contig1_NK	870	1304	70.4348	--	--	--	--
Unigene13487_NK	1957	2932	70.4048	gi|348569482|ref|XP_003470527.1|	1119.4	0	PREDICTED: eukaryotic translation initiation factor 3 subunit L-like isoform 1 [Cavia porcellus]
Unigene6707_NK	370	554	70.3618	gi|47223633|emb|CAF99242.1|	84	2e-15	unnamed protein product [Tetraodon nigroviridis]
Unigene24346_NK	871	1304	70.3539	--	--	--	--
Unigene6805_NK	475	711	70.3404	--	--	--	--
Unigene29615_NK	949	1420	70.3155	gi|465952544|gb|EMP24964.1|	184.1	8e-45	Apoptosis-associated speck-like protein containing a CARD [Chelonia mydas]
Unigene6757_NK	570	852	70.2415	gi|327285416|ref|XP_003227429.1|	142.9	8e-33	PREDICTED: NADH dehydrogenase [ubiquinone] iron-sulfur protein 5-like [Anolis carolinensis]
Unigene13917_NK	2960	4417	70.1237	gi|327292114|ref|XP_003230765.1|	781.9	0	PREDICTED: nuclear receptor coactivator 4-like, partial [Anolis carolinensis]
Unigene29301_NK	232	346	70.0837	gi|407263326|ref|XP_003945461.1|	63.5	3e-09	PREDICTED: uncharacterized protein LOC101056242 [Mus musculus]
Unigene20820_NK	2001	2982	70.0309	gi|327261995|ref|XP_003215812.1|	1038.1	0	PREDICTED: t-complex protein 1 subunit alpha-like [Anolis carolinensis]
CL3939.Contig13_NK	1620	2411	69.9377	gi|188501721|gb|ACD54829.1|	418.3	5e-115	MHC class I antigen [Amblyrhynchus cristatus]
Unigene22837_NK	530	788	69.8681	--	--	--	--
Unigene15309_NK	496	737	69.8256	gi|327270908|ref|XP_003220230.1|	339.7	3e-92	PREDICTED: guanine nucleotide-binding protein G(k) subunit alpha-like [Anolis carolinensis]
Unigene6619_NK	851	1264	69.7985	gi|344287504|ref|XP_003415493.1|	54.7	6e-06	PREDICTED: serine/arginine-rich splicing factor 4-like [Loxodonta africana]
Unigene20121_NK	1580	2345	69.7453	gi|17367183|sp|Q9W7L0.3|ENOA_PYTRG	744.6	0	RecName: Full=Alpha-enolase; AltName: Full=2-phospho-D-glycerate hydro-lyase; AltName: Full=Phosphopyruvate hydratase >gi|5305427|gb|AAD41646.1|AF072589_1 alpha enolase [Python regius]
Unigene27784_NK	517	766	69.6253	gi|148229272|ref|NP_001080074.1|	193.4	3e-48	alpha-endosulfine [Xenopus laevis] >gi|82176597|sp|Q7ZXH9.1|ENSA_XENLA RecName: Full=Alpha-endosulfine >gi|27924193|gb|AAH44986.1| Ensa-prov protein [Xenopus laevis]
Unigene6472_NK	277	410	69.5557	--	--	--	--
Unigene20558_NK	442	654	69.5319	gi|465976352|gb|EMP34353.1|	97.8	1e-19	Protein disulfide-isomerase A4 [Chelonia mydas]
Unigene28684_NK	1448	2142	69.5152	--	--	--	--
Unigene14056_NK	2477	3664	69.5118	gi|327277354|ref|XP_003223430.1|	799.3	0	PREDICTED: SLAIN motif-containing protein-like [Anolis carolinensis]
Unigene31576_NK	1895	2803	69.5093	gi|156523130|ref|NP_001095979.1|	523.9	1e-146	surfeit locus protein 4 [Bos taurus] >gi|206557744|sp|A7YY49.1|SURF4_BOVIN RecName: Full=Surfeit locus protein 4 >gi|154426120|gb|AAI51307.1| SURF4 protein [Bos taurus] >gi|296482057|tpg|DAA24172.1| TPA: surfeit 4 [Bos taurus]
Unigene15197_NK	1622	2399	69.5038	gi|327285780|ref|XP_003227610.1|	484.6	6e-135	PREDICTED: palmitoyl-protein thioesterase 1-like [Anolis carolinensis]
Unigene31195_NK	651	961	69.3699	--	--	--	--
Unigene23449_NK	857	1265	69.3647	--	--	--	--
Unigene22938_NK	982	1449	69.3403	gi|327290511|ref|XP_003229966.1|	178.3	5e-43	PREDICTED: RNA-binding protein 14-like [Anolis carolinensis]
Unigene25218_NK	804	1185	69.2614	gi|363743982|ref|XP_424458.3|	281.6	3e-74	PREDICTED: signal peptidase complex catalytic subunit SEC11C [Gallus gallus]
CL35.Contig2_NK	839	1236	69.2286	gi|327288961|ref|XP_003229193.1|	143.7	1e-32	PREDICTED: zinc finger protein 729-like [Anolis carolinensis]
Unigene22937_NK	1144	1685	69.2154	gi|327290511|ref|XP_003229966.1|	477.6	5e-133	PREDICTED: RNA-binding protein 14-like [Anolis carolinensis]
Unigene31677_NK	327	481	69.1236	--	--	--	--
Unigene27443_NK	1026	1509	69.1148	gi|327290256|ref|XP_003229839.1|	120.2	0	PREDICTED: LOW QUALITY PROTEIN: splicing factor 1-like [Anolis carolinensis]
CL3939.Contig1_NK	1341	1972	69.1046	gi|188501733|gb|ACD54835.1|	312.8	2e-83	MHC class I antigen [Conolophus subcristatus]
Unigene14161_NK	297	436	68.9857	gi|471381062|ref|XP_004378324.1|	174.9	1e-42	PREDICTED: elongation factor 1-beta isoform 1 [Trichechus manatus latirostris] >gi|471381064|ref|XP_004378325.1| PREDICTED: elongation factor 1-beta isoform 2 [Trichechus manatus latirostris]
Unigene31254_NK	576	844	68.8571	gi|327261461|ref|XP_003215549.1|	293.5	3e-78	PREDICTED: stromal membrane-associated protein 1-like isoform 2 [Anolis carolinensis]
Unigene25608_NK	877	1285	68.8545	--	--	--	--
Unigene31580_NK	1497	2193	68.8408	gi|449472515|ref|XP_004175034.1|	382.9	2e-104	PREDICTED: CCR4-NOT transcription complex subunit 1 isoform 2 [Taeniopygia guttata]
Unigene31623_NK	455	666	68.7847	gi|327284463|ref|XP_003226957.1|	188.3	9e-47	PREDICTED: c-Myc-binding protein-like [Anolis carolinensis]
Unigene21055_NK	248	363	68.7834	gi|449271150|gb|EMC81698.1|	155.6	6e-37	Annexin A5, partial [Columba livia]
Unigene15229_NK	464	679	68.7671	--	--	--	--
Unigene31671_NK	1003	1467	68.7319	gi|344274687|ref|XP_003409146.1|	382.5	1e-104	PREDICTED: thioredoxin-dependent peroxide reductase, mitochondrial-like isoform 1 [Loxodonta africana]
Unigene29756_NK	1094	1600	68.7277	gi|440911197|gb|ELR60903.1|	441.8	2e-122	Ras-related protein Rab-14, partial [Bos grunniens mutus]
Unigene89_NK	1831	2676	68.6794	gi|300677966|gb|ADK27290.1|	368.2	8e-100	high-mobility-group B1a [Gekko japonicus]
Unigene764_NK	655	957	68.6593	--	--	--	--
Unigene29540_NK	640	935	68.6532	--	--	--	--
Unigene23879_NK	4953	7232	68.615	gi|449278372|gb|EMC86215.1|	1265.8	0	Mannosyl-oligosaccharide 1,2-alpha-mannosidase IB [Columba livia]
Unigene31656_NK	736	1071	68.3818	--	--	--	--
CL202.Contig1_NK	3554	5168	68.3335	gi|327288054|ref|XP_003228743.1|	481.9	1e-133	PREDICTED: cyclin-L1-like [Anolis carolinensis]
Unigene31660_NK	1519	2203	68.1531	gi|327260972|ref|XP_003215306.1|	704.9	0	PREDICTED: nucleotide exchange factor SIL1-like [Anolis carolinensis]
Unigene23783_NK	1212	1757	68.1237	gi|327286578|ref|XP_003228007.1|	107.5	1e-21	PREDICTED: stress-induced-phosphoprotein 1-like [Anolis carolinensis]
Unigene28625_NK	457	662	68.0723	gi|465970308|gb|EMP32310.1|	212.6	4e-54	Putative protein C6orf89 like protein [Chelonia mydas]
CL932.Contig1_NK	330	478	68.068	gi|327280890|ref|XP_003225184.1|	109.8	4e-23	PREDICTED: ig lambda chain V-II region BUR-like [Anolis carolinensis]
Unigene24304_NK	1174	1700	68.0471	gi|45361313|ref|NP_989234.1|	450.3	9e-125	uncharacterized protein LOC394843 [Xenopus (Silurana) tropicalis]
Unigene30854_NK	331	479	68.0043	gi|149463902|ref|XP_001506662.1|	65.1	1e-09	PREDICTED: hypothetical protein LOC100075123, partial [Ornithorhynchus anatinus]
Unigene6597_NK	1065	1538	67.8634	gi|50344916|ref|NP_001002130.1|	331.3	5e-89	mannose-P-dolichol utilization defect 1 protein [Danio rerio] >gi|47937968|gb|AAH71434.1| Mannose-P-dolichol utilization defect 1b [Danio rerio]
Unigene22335_NK	399	576	67.8388	--	--	--	--
Unigene13566_NK	1335	1926	67.796	gi|327260958|ref|XP_003215299.1|	450.3	1e-124	PREDICTED: nucleophosmin-like isoform 2 [Anolis carolinensis]
Unigene20281_NK	1904	2744	67.7245	gi|206205|gb|AAB93667.1|	968.4	0	M2 pyruvate kinase [Rattus norvegicus] >gi|149041863|gb|EDL95704.1| rCG57843, isoform CRA_a [Rattus norvegicus]
Unigene28555_NK	238	343	67.7245	--	--	--	--
Unigene30931_NK	506	729	67.7027	--	--	--	--
Unigene15394_NK	407	586	67.66	--	--	--	--
Unigene6527_NK	263	378	67.5406	--	--	--	--
Unigene29037_NK	1316	1891	67.525	gi|327280552|ref|XP_003225016.1|	352.8	2e-95	PREDICTED: synaptophysin-like protein 1-like [Anolis carolinensis]
CL3462.Contig1_NK	534	767	67.4968	--	--	--	--
CL5448.Contig1_NK	297	426	67.4034	--	--	--	--
Unigene24581_NK	966	1385	67.3754	--	--	--	--
CL4075.Contig2_NK	524	751	67.35	--	--	--	--
Unigene29080_NK	2318	3321	67.3262	gi|61744133|gb|AAX55650.1|	863.2	0	C-terminal binding protein 1 [Coturnix coturnix]
Unigene23807_NK	355	508	67.2457	--	--	--	--
Unigene31587_NK	1238	1771	67.2244	gi|327259839|ref|XP_003214743.1|	715.7	0	PREDICTED: eukaryotic translation initiation factor 3 subunit M-like [Anolis carolinensis]
Unigene360_NK	380	543	67.1499	--	--	--	--
Unigene6505_NK	428	611	67.0851	gi|327280182|ref|XP_003224832.1|	213.4	2e-54	PREDICTED: signal recognition particle 14 kDa protein-like isoform 1 [Anolis carolinensis]
Unigene25652_NK	543	775	67.0704	--	--	--	--
Unigene27989_NK	271	386	66.934	--	--	--	--
Unigene15420_NK	655	932	66.8657	--	--	--	--
Unigene20753_NK	1629	2317	66.8396	gi|148224419|ref|NP_001084727.1|	983.4	0	sorting nexin family member 27 [Xenopus laevis] >gi|90112007|gb|AAI14222.1| LOC414692 protein [Xenopus laevis]
Unigene14593_NK	469	666	66.7314	gi|403299963|ref|XP_003940739.1|	233.8	1e-60	PREDICTED: transcription elongation factor B polypeptide 1 [Saimiri boliviensis boliviensis]
CL2895.Contig1_NK	208	295	66.6481	--	--	--	--
Unigene25340_NK	244	346	66.637	gi|118091656|ref|XP_421155.2|	86.3	4e-16	PREDICTED: transmembrane protein 87A-like [Gallus gallus]
Unigene25606_NK	1292	1832	66.6334	--	--	--	--
CL3544.Contig2_NK	3533	5007	66.5983	gi|66360405|pdb|1X23|A	313.5	5e-83	Chain A, Crystal Structure Of Ubch5c >gi|66360406|pdb|1X23|B Chain B, Crystal Structure Of Ubch5c >gi|66360407|pdb|1X23|C Chain C, Crystal Structure Of Ubch5c >gi|66360408|pdb|1X23|D Chain D, Crystal Structure Of Ubch5c
Unigene25635_NK	245	347	66.5568	gi|327282894|ref|XP_003226177.1|	163.3	3e-39	PREDICTED: stromal interaction molecule 2-like [Anolis carolinensis]
CL66.Contig3_NK	342	484	66.5041	--	--	--	--
Unigene27030_NK	203	287	66.4377	--	--	--	--
Unigene30650_NK	335	473	66.3507	--	--	--	--
Unigene13534_NK	696	982	66.3027	--	--	--	--
Unigene22331_NK	721	1015	66.1545	gi|327290501|ref|XP_003229961.1|	183.3	9e-45	PREDICTED: brain protein I3-like [Anolis carolinensis]
Unigene15319_NK	713	1002	66.04	gi|327269992|ref|XP_003219776.1|	203.8	6e-51	PREDICTED: tyrosine-protein phosphatase non-receptor type 2-like [Anolis carolinensis]
Unigene14488_NK	279	392	66.0254	gi|354470046|ref|XP_003497405.1|	124.4	1e-27	PREDICTED: cytochrome b-c1 complex subunit 6, mitochondrial-like [Cricetulus griseus]
Unigene14230_NK	996	1399	66.0066	gi|327273710|ref|XP_003221623.1|	230.3	1e-58	PREDICTED: transmembrane protein 165-like [Anolis carolinensis]
Unigene28562_NK	1082	1517	65.8851	gi|465958139|gb|EMP27735.1|	636.3	0	Eukaryotic translation initiation factor 4 gamma 1 [Chelonia mydas]
Unigene20813_NK	3490	4893	65.8838	gi|327266780|ref|XP_003218182.1|	313.2	6e-83	PREDICTED: eukaryotic translation initiation factor 5A-2-like [Anolis carolinensis]
Unigene30392_NK	1977	2771	65.8656	gi|327280792|ref|XP_003225135.1|	1129.8	0	PREDICTED: serine/threonine-protein phosphatase 2A 65 kDa regulatory subunit A alpha isoform-like [Anolis carolinensis]
Unigene28863_NK	269	377	65.8594	--	--	--	--
Unigene24510_NK	2733	3828	65.8205	--	--	--	--
Unigene21221_NK	3045	4264	65.805	--	--	--	--
Unigene6631_NK	1357	1900	65.7965	gi|118103341|ref|XP_418266.2|	189.1	4e-46	PREDICTED: protein FAM32A [Gallus gallus]
Unigene30026_NK	1893	2648	65.7349	gi|327280955|ref|XP_003225216.1|	299.7	3e-79	PREDICTED: ETS homologous factor-like [Anolis carolinensis]
Unigene27463_NK	417	583	65.6994	--	--	--	--
Unigene546_NK	1620	2263	65.6445	gi|363731896|ref|XP_423972.3|	283.1	2e-74	PREDICTED: mitochondrial import receptor subunit TOM20 homolog [Gallus gallus]
Unigene26256_NK	983	1373	65.6366	--	--	--	--
CL4700.Contig1_NK	1329	1855	65.5915	gi|327285984|ref|XP_003227711.1|	304.7	7e-81	PREDICTED: growth arrest and DNA damage-inducible protein GADD45 gamma-like isoform 2 [Anolis carolinensis]
Unigene24064_NK	2525	3521	65.529	gi|135307|sp|P27921.1|JUND_CHICK	370.5	2e-100	RecName: Full=Transcription factor jun-D >gi|62928|emb|CAA42665.1| junD [Gallus gallus]
Unigene13593_NK	903	1259	65.5189	--	--	--	--
Unigene21417_NK	1851	2579	65.4747	gi|327266500|ref|XP_003218043.1|	946.8	0	PREDICTED: hypothetical protein LOC100555197 [Anolis carolinensis]
Unigene23368_NK	547	761	65.3772	gi|395502655|ref|XP_003755693.1|	218.4	1e-55	PREDICTED: zinc finger protein 609 [Sarcophilus harrisii]
Unigene20559_NK	772	1074	65.3756	gi|327275015|ref|XP_003222269.1|	456.4	6e-127	PREDICTED: protein disulfide-isomerase A4-like [Anolis carolinensis]
Unigene7859_NK	318	441	65.1689	--	--	--	--
Unigene27365_NK	2652	3666	64.9603	gi|327285022|ref|XP_003227234.1|	716.1	0	PREDICTED: lysophosphatidic acid receptor 1-like [Anolis carolinensis]
Unigene20856_NK	675	932	64.8845	--	--	--	--
Unigene25331_NK	1650	2278	64.8782	gi|327259499|ref|XP_003214574.1|	65.9	7e-09	PREDICTED: RNA-binding protein 25-like isoform 4 [Anolis carolinensis]
Unigene30217_NK	263	363	64.8604	--	--	--	--
Unigene31646_NK	1947	2684	64.7807	gi|327281271|ref|XP_003225372.1|	1242.6	0	PREDICTED: coatomer subunit beta-like [Anolis carolinensis]
Unigene6601_NK	1188	1637	64.7532	gi|465950345|gb|EMP23779.1|	344.7	5e-93	hypothetical protein UY3_19221 [Chelonia mydas]
Unigene31693_NK	591	813	64.6446	gi|350538623|ref|NP_001232341.1|	223	6e-57	putative mitochondrial ribosomal protein S17 variant 1 [Taeniopygia guttata] >gi|326931270|ref|XP_003211756.1| PREDICTED: 28S ribosomal protein S17, mitochondrial-like [Meleagris gallopavo] >gi|197128135|gb|ACH44633.1| putative mitochondrial ribosomal protein S17 variant 1 [Taeniopygia guttata] >gi|197128136|gb|ACH44634.1| putative mitochondrial ribosomal protein S17 variant 2 [Taeniopygia guttat…
Unigene971_NK	341	469	64.632	gi|327289059|ref|XP_003229242.1|	163.7	2e-39	PREDICTED: hypothetical protein LOC100560804 [Anolis carolinensis]
Unigene31643_NK	464	638	64.6147	--	--	--	--
Unigene28966_NK	243	334	64.5906	--	--	--	--
CL2302.Contig1_NK	406	557	64.4701	gi|18029449|gb|AAL56548.1|AF387862_2	42	6e-15	pol polyprotein [Anopheles gambiae]
Unigene6492_NK	468	642	64.4641	gi|395842947|ref|XP_003794268.1|	245	8e-64	PREDICTED: T-complex protein 1 subunit zeta isoform 1 [Otolemur garnettii]
Unigene20832_NK	565	775	64.4588	gi|327278490|ref|XP_003223995.1|	122.1	1e-26	PREDICTED: thioredoxin domain-containing protein 15-like [Anolis carolinensis]
Unigene29115_NK	635	871	64.4575	gi|4239700|emb|CAA10770.1|	57	7e-07	reverse transcriptase-like [Bos taurus]
Unigene13672_NK	291	399	64.4331	--	--	--	--
Unigene821_NK	603	825	64.2933	gi|75570171|sp|Q90WI7.1|CLEC2_BUNFA	280	4e-74	RecName: Full=C-type lectin BFL-2; Flags: Precursor >gi|13876737|gb|AAK43585.1|AF354271_1 C-type lectin-like protein 2 [Bungarus fasciatus]
CL1177.Contig1_NK	623	852	64.2659	--	--	--	--
Unigene31661_NK	235	321	64.1898	--	--	--	--
Unigene27658_NK	813	1110	64.1596	gi|327285039|ref|XP_003227242.1|	253.4	9e-66	PREDICTED: hypothetical protein LOC100567164 isoform 2 [Anolis carolinensis]
Unigene31680_NK	663	905	64.1452	gi|327276387|ref|XP_003222951.1|	312.4	1e-83	PREDICTED: heterogeneous nuclear ribonucleoprotein U-like protein 1-like [Anolis carolinensis]
Unigene15224_NK	1321	1802	64.1034	gi|327274272|ref|XP_003221902.1|	508.8	2e-142	PREDICTED: g-rich sequence factor 1-like [Anolis carolinensis]
Unigene25237_NK	1366	1863	64.0901	gi|327284548|ref|XP_003226999.1|	57.4	2e-06	PREDICTED: complement factor H-like [Anolis carolinensis]
Unigene13579_NK	1037	1414	64.0766	gi|334313188|ref|XP_001365362.2|	231.9	4e-59	PREDICTED: polyadenylate-binding protein-interacting protein 2B-like [Monodelphis domestica]
Unigene25279_NK	1741	2372	64.0243	gi|327273540|ref|XP_003221538.1|	544.3	7e-153	PREDICTED: NADH-cytochrome b5 reductase 3-like [Anolis carolinensis]
Unigene31692_NK	268	365	64.001	--	--	--	--
Unigene20282_NK	877	1194	63.9784	--	--	--	--
Unigene29316_NK	1998	2720	63.9738	--	--	--	--
Unigene31663_NK	610	830	63.9407	gi|327264776|ref|XP_003217187.1|	186.8	5e-46	PREDICTED: NADH dehydrogenase [ubiquinone] 1 beta subcomplex subunit 7-like [Anolis carolinensis]
CL1870.Contig2_NK	1322	1798	63.9127	--	--	--	--
Unigene23544_NK	1853	2520	63.9078	gi|327268872|ref|XP_003219219.1|	713.8	0	PREDICTED: protein TFG-like [Anolis carolinensis]
CL1827.Contig1_NK	1642	2232	63.8778	--	--	--	--
Unigene18899_NK	2463	3347	63.8587	gi|327271375|ref|XP_003220463.1|	973.8	0	PREDICTED: seryl-tRNA synthetase, cytoplasmic-like [Anolis carolinensis]
CL4333.Contig2_NK	1046	1421	63.8398	gi|327286508|ref|XP_003227972.1|	426.4	1e-117	PREDICTED: calcium release-activated calcium channel protein 1-like [Anolis carolinensis]
Unigene27366_NK	1116	1515	63.7936	--	--	--	--
Unigene25346_NK	2591	3517	63.7872	gi|327263167|ref|XP_003216392.1|	1427.9	0	PREDICTED: zinc transporter 5-like [Anolis carolinensis]
CL3924.Contig1_NK	216	293	63.7445	gi|170573162|ref|XP_001892369.1|	89.4	5e-17	hypothetical protein [Brugia malayi] >gi|158602150|gb|EDP38806.1| conserved hypothetical protein [Brugia malayi]
Unigene30410_NK	466	632	63.7324	--	--	--	--
Unigene31665_NK	425	576	63.6887	--	--	--	--
Unigene25660_NK	1099	1489	63.6687	--	--	--	--
Unigene31794_NK	243	329	63.6236	--	--	--	--
Unigene31612_NK	886	1199	63.5937	gi|395837378|ref|XP_003791613.1|	114.8	5e-24	PREDICTED: NADH dehydrogenase [ubiquinone] 1 beta subcomplex subunit 2, mitochondrial isoform 1 [Otolemur garnettii]
Unigene13759_NK	888	1198	63.3976	gi|47523694|ref|NP_999483.1|	414.1	4e-114	calpain small subunit 1 [Sus scrofa] >gi|115613|sp|P04574.1|CPNS1_PIG RecName: Full=Calpain small subunit 1; Short=CSS1; AltName: Full=Calcium-activated neutral proteinase small subunit; Short=CANP small subunit; AltName: Full=Calcium-dependent protease small subunit; Short=CDPS; AltName: Full=Calcium-dependent protease small subunit 1; AltName: Full=Calpain regulatory subunit >gi|164403|gb|AAA31…
Unigene30360_NK	387	522	63.3853	--	--	--	--
Unigene27045_NK	2421	3265	63.3749	gi|327272524|ref|XP_003221034.1|	626.7	1e-177	PREDICTED: hsc70-interacting protein-like [Anolis carolinensis]
Unigene20080_NK	2118	2855	63.3445	gi|395516848|ref|XP_003762596.1|	462.6	3e-128	PREDICTED: insulin-like growth factor-binding protein 3 [Sarcophilus harrisii]
Unigene23983_NK	1249	1683	63.3214	--	--	--	--
Unigene21003_NK	899	1211	63.3014	gi|327265496|ref|XP_003217544.1|	69.3	2e-10	PREDICTED: hypothetical protein LOC100555396 [Anolis carolinensis]
Unigene29886_NK	1237	1666	63.2899	--	--	--	--
Unigene27757_NK	456	614	63.275	--	--	--	--
Unigene6469_NK	1762	2371	63.2346	gi|84105333|ref|NP_001032250.1|	690.6	0	mortality factor 4 like 1 isoform 1 [Gallus gallus]
Unigene13251_NK	874	1176	63.2302	gi|327265603|ref|XP_003217597.1|	148.3	4e-34	PREDICTED: probable protein BRICK1-like [Anolis carolinensis]
Unigene29937_NK	600	806	63.1266	--	--	--	--
Unigene28414_NK	957	1285	63.0987	--	--	--	--
Unigene10511_NK	1278	1715	63.0612	gi|327283153|ref|XP_003226306.1|	625.5	1e-177	PREDICTED: lupus La protein homolog [Anolis carolinensis]
Unigene25084_NK	1077	1445	63.0494	gi|327282247|ref|XP_003225855.1|	534.6	3e-150	PREDICTED: serine/threonine-protein kinase/endoribonuclease IRE1-like [Anolis carolinensis]
Unigene15751_NK	384	515	63.0238	gi|465975502|gb|EMP34135.1|	102.4	6e-21	Dynein light chain 1, cytoplasmic [Chelonia mydas]
Unigene11828_NK	1286	1723	62.9612	gi|327264933|ref|XP_003217263.1|	233.4	1e-59	PREDICTED: hematological and neurological expressed 1 protein-like [Anolis carolinensis]
Unigene24881_NK	3448	4615	62.8975	gi|327289934|ref|XP_003229679.1|	719.2	0	PREDICTED: interferon regulatory factor 2-binding protein 1-like [Anolis carolinensis]
Unigene26819_NK	1102	1473	62.8131	--	--	--	--
Unigene31042_NK	229	306	62.7935	--	--	--	--
Unigene31686_NK	1051	1404	62.7759	gi|327259447|ref|XP_003214548.1|	417.5	5e-115	PREDICTED: UPF0480 protein C15orf24 homolog [Anolis carolinensis]
Unigene13582_NK	1245	1663	62.77	gi|327270594|ref|XP_003220074.1|	139	4e-31	PREDICTED: cystatin-like [Anolis carolinensis]
Unigene492_NK	1311	1749	62.6926	gi|327282876|ref|XP_003226168.1|	237.3	1e-60	PREDICTED: proteasome inhibitor PI31 subunit-like [Anolis carolinensis]
Unigene13573_NK	593	791	62.6831	gi|83754945|pdb|2ESK|A	183.3	5e-45	Chain A, Human Ubiquitin-Conjugating Enzyme (E2) Ubch5b, Wild-Type
Unigene31635_NK	1298	1731	62.6688	--	--	--	--
Unigene30402_NK	1815	2420	62.6567	gi|326930374|ref|XP_003211322.1|	936	0	PREDICTED: far upstream element-binding protein 3-like [Meleagris gallopavo]
Unigene6909_NK	994	1325	62.641	gi|327281174|ref|XP_003225324.1|	547.7	3e-154	PREDICTED: eukaryotic translation initiation factor 3 subunit C-like [Anolis carolinensis]
Unigene15131_NK	725	966	62.6135	gi|327263610|ref|XP_003216612.1|	89.7	1e-16	PREDICTED: endoplasmic reticulum metallopeptidase 1-like [Anolis carolinensis]
CL5126.Contig1_NK	330	439	62.5143	--	--	--	--
Unigene28057_NK	391	520	62.4965	gi|471382317|ref|XP_004378943.1|	89	7e-17	PREDICTED: charged multivesicular body protein 1b-2-like, partial [Trichechus manatus latirostris]
CL2492.Contig1_NK	1689	2246	62.4898	gi|426329192|ref|XP_004025626.1|	44.7	4e-171	PREDICTED: nuclease-sensitive element-binding protein 1 [Gorilla gorilla gorilla]
Unigene30412_NK	577	767	62.4667	gi|431898133|gb|ELK06828.1|	141.7	1e-32	hypothetical protein PAL_GLEAN10011960 [Pteropus alecto]
Unigene15240_NK	1974	2620	62.371	--	--	--	--
Unigene20161_NK	1162	1542	62.3601	gi|1488414|gb|AAB36476.1|	285.8	2e-75	N8 gene product long isoform, N8L protein=D52 homolog/leucine zipper protein {alternatively spliced, clone HK4a1} [human, normal kidney, Peptide, 248 aa]
Unigene29333_NK	751	995	62.2604	--	--	--	--
Unigene27699_NK	3196	4233	62.2401	gi|327267923|ref|XP_003218748.1|	1216.5	0	PREDICTED: transmembrane 9 superfamily member 2-like [Anolis carolinensis]
Unigene23403_NK	638	845	62.2393	--	--	--	--
Unigene6475_NK	771	1021	62.2301	gi|327263846|ref|XP_003216728.1|	221.5	3e-56	PREDICTED: ATP synthase lipid-binding protein, mitochondrial-like [Anolis carolinensis]
CL5450.Contig1_NK	889	1177	62.2162	gi|345323013|ref|XP_001509500.2|	201.8	3e-50	PREDICTED: caspase-1-like [Ornithorhynchus anatinus]
Unigene31565_NK	3298	4364	62.1818	gi|327261689|ref|XP_003215661.1|	1432.9	0	PREDICTED: translocation protein SEC63 homolog [Anolis carolinensis]
Unigene29265_NK	211	279	62.1371	--	--	--	--
Unigene6474_NK	509	673	62.1336	gi|327261579|ref|XP_003215607.1|	269.2	5e-71	PREDICTED: HD domain-containing protein 2-like [Anolis carolinensis]
Unigene25602_NK	374	494	62.0704	--	--	--	--
Unigene27794_NK	826	1091	62.0688	--	--	--	--
Unigene184_NK	858	1133	62.0542	--	--	--	--
Unigene13689_NK	1633	2156	62.0428	gi|327262701|ref|XP_003216162.1|	799.3	0	PREDICTED: eukaryotic initiation factor 4A-III-like [Anolis carolinensis]
Unigene24547_NK	307	405	61.9934	--	--	--	--
Unigene31648_NK	577	761	61.978	--	--	--	--
Unigene31662_NK	1112	1466	61.9524	--	--	--	--
Unigene31657_NK	1072	1413	61.9407	gi|327291868|ref|XP_003230642.1|	308.1	4e-82	PREDICTED: complement C1q subcomponent subunit A-like [Anolis carolinensis]
Unigene30363_NK	824	1086	61.9343	--	--	--	--
CL3401.Contig1_NK	280	369	61.9294	--	--	--	--
Unigene31650_NK	1899	2502	61.9143	gi|327283135|ref|XP_003226297.1|	1090.5	0	PREDICTED: phosphoglucomutase-2-like [Anolis carolinensis]
Unigene26346_NK	455	599	61.8649	gi|148709445|gb|EDL41391.1|	164.1	1e-39	PRP19/PSO4 pre-mRNA processing factor 19 homolog (S. cerevisiae), isoform CRA_a [Mus musculus]
Unigene26759_NK	402	529	61.8384	--	--	--	--
Unigene27736_NK	2786	3664	61.8021	gi|327266734|ref|XP_003218159.1|	1496.5	0	PREDICTED: probable phospholipid-transporting ATPase IF-like [Anolis carolinensis]
Unigene28456_NK	432	568	61.7865	--	--	--	--
Unigene31753_NK	229	301	61.7675	--	--	--	--
Unigene31579_NK	1445	1898	61.7245	gi|327264758|ref|XP_003217178.1|	392.9	2e-107	PREDICTED: synaptogyrin-2-like [Anolis carolinensis]
CL4745.Contig1_NK	3230	4240	61.6868	gi|327271011|ref|XP_003220281.1|	1054.7	0	PREDICTED: putative adenosylhomocysteinase 2-like [Anolis carolinensis]
Unigene612_NK	285	374	61.6674	--	--	--	--
Unigene30956_NK	426	558	61.5536	--	--	--	--
Unigene22124_NK	2757	3610	61.5318	gi|327275183|ref|XP_003222353.1|	479.2	5e-133	PREDICTED: endoplasmic reticulum resident protein 44-like [Anolis carolinensis]
Unigene23967_NK	813	1064	61.5007	gi|1588651|prf||2209256A	156	1e-36	rab2 gene
CL511.Contig2_NK	522	683	61.4864	--	--	--	--
Unigene22131_NK	319	417	61.4291	--	--	--	--
Unigene31601_NK	835	1091	61.3998	--	--	--	--
Unigene30691_NK	1015	1326	61.3912	--	--	--	--
Unigene15638_NK	1291	1686	61.3706	gi|327289215|ref|XP_003229320.1|	511.1	4e-143	PREDICTED: Golgi phosphoprotein 3-like [Anolis carolinensis]
Unigene31614_NK	889	1161	61.3705	gi|326932992|ref|XP_003212594.1|	358.6	2e-97	PREDICTED: probable U3 small nucleolar RNA-associated protein 11-like [Meleagris gallopavo]
Unigene31637_NK	564	736	61.3236	--	--	--	--
Unigene31702_NK	427	557	61.2994	--	--	--	--
Unigene15199_NK	796	1038	61.2792	gi|355778546|gb|EHH63582.1|	56.2	2e-06	hypothetical protein EGM_16579, partial [Macaca fascicularis]
Unigene31630_NK	724	941	61.0773	gi|395847522|ref|XP_003796418.1|	189.9	9e-47	PREDICTED: 10 kDa heat shock protein, mitochondrial-like [Otolemur garnettii]
Unigene6697_NK	1148	1490	60.9921	gi|327281269|ref|XP_003225371.1|	510.4	7e-143	PREDICTED: proteasome subunit alpha type-1-like [Anolis carolinensis]
Unigene25070_NK	1748	2268	60.972	--	--	--	--
Unigene24490_NK	777	1008	60.9633	gi|327277740|ref|XP_003223621.1|	313.5	6e-84	PREDICTED: eukaryotic translation elongation factor 1 epsilon-1-like [Anolis carolinensis]
Unigene24148_NK	850	1102	60.9244	gi|465979948|gb|EMP35382.1|	396.4	9e-109	High mobility group protein B3 [Chelonia mydas]
Unigene25587_NK	1555	2016	60.9241	gi|399567823|ref|NP_001257807.1|	308.5	6e-82	T-box transcription factor TBX3 [Gallus gallus]
Unigene15595_NK	601	779	60.9105	gi|149436984|ref|XP_001511179.1|	260.4	3e-68	PREDICTED: neuroepithelial cell-transforming gene 1 protein-like [Ornithorhynchus anatinus]
Unigene27237_NK	493	639	60.9092	--	--	--	--
Unigene30700_NK	1179	1528	60.903	gi|118099492|ref|XP_001234493.1|	445.3	2e-123	PREDICTED: phosducin-like [Gallus gallus]
Unigene23317_NK	710	919	60.8256	gi|327279835|ref|XP_003224661.1|	193	1e-47	PREDICTED: protein LLP homolog isoform 1 [Anolis carolinensis] >gi|327279837|ref|XP_003224662.1| PREDICTED: protein LLP homolog isoform 2 [Anolis carolinensis]
CL4110.Contig8_NK	1941	2512	60.8167	gi|449271873|gb|EMC82058.1|	154.1	2e-35	MANSC domain-containing protein 1, partial [Columba livia]
Unigene6541_NK	990	1276	60.5682	gi|327287496|ref|XP_003228465.1|	245.7	2e-63	PREDICTED: MIP18 family protein FAM96A-like [Anolis carolinensis]
CL3939.Contig2_NK	1299	1674	60.5585	gi|188501739|gb|ACD54838.1|	326.6	1e-87	MHC class I antigen [Iguana iguana]
CL70.Contig1_NK	309	398	60.5276	--	--	--	--
CL3546.Contig1_NK	1150	1481	60.5182	gi|327271684|ref|XP_003220617.1|	402.9	1e-110	PREDICTED: cysteine and glycine-rich protein 1-like [Anolis carolinensis]
Unigene28463_NK	928	1195	60.513	--	--	--	--
CL294.Contig2_NK	915	1177	60.4483	gi|327283649|ref|XP_003226553.1|	242.7	1e-62	PREDICTED: mucosal pentraxin-like [Anolis carolinensis]
Unigene27342_NK	1618	2079	60.3816	gi|157151710|ref|NP_001096671.1|	548.5	3e-154	E3 UFM1-protein ligase 1 [Gallus gallus]
Unigene30033_NK	457	587	60.3602	--	--	--	--
Unigene27682_NK	707	908	60.3525	gi|327270273|ref|XP_003219914.1|	282	1e-74	PREDICTED: calcyclin-binding protein-like [Anolis carolinensis]
Unigene23532_NK	975	1252	60.3432	--	--	--	--
Unigene30397_NK	690	886	60.3411	--	--	--	--
CL3939.Contig9_NK	1607	2062	60.2978	gi|188501721|gb|ACD54829.1|	418.3	5e-115	MHC class I antigen [Amblyrhynchus cristatus]
Unigene14163_NK	706	905	60.2383	--	--	--	--
Unigene31691_NK	917	1175	60.214	gi|327288953|ref|XP_003229189.1|	506.1	9e-142	PREDICTED: small nuclear ribonucleoprotein-associated protein B&apos;-like [Anolis carolinensis]
Unigene20870_NK	555	711	60.2012	gi|327268672|ref|XP_003219120.1|	125.6	1e-27	PREDICTED: ATP synthase-coupling factor 6, mitochondrial-like isoform 1 [Anolis carolinensis] >gi|327268674|ref|XP_003219121.1| PREDICTED: ATP synthase-coupling factor 6, mitochondrial-like isoform 2 [Anolis carolinensis] >gi|327268676|ref|XP_003219122.1| PREDICTED: ATP synthase-coupling factor 6, mitochondrial-like isoform 3 [Anolis carolinensis]
Unigene22899_NK	3250	4163	60.1938	gi|327260968|ref|XP_003215304.1|	1388.6	0	PREDICTED: catenin alpha-1-like [Anolis carolinensis]
Unigene30672_NK	226	289	60.0922	gi|327287440|ref|XP_003228437.1|	107.1	2e-22	PREDICTED: hepatoma-derived growth factor-like [Anolis carolinensis]
Unigene14272_NK	1291	1650	60.0602	gi|449504361|ref|XP_002199382.2|	218.8	5e-55	PREDICTED: uncharacterized protein LOC100223968 [Taeniopygia guttata]
Unigene6523_NK	1853	2364	59.9516	gi|327279478|ref|XP_003224483.1|	518.5	4e-145	PREDICTED: keratin, type II cytoskeletal 8-like [Anolis carolinensis]
Unigene6849_NK	910	1159	59.8509	--	--	--	--
Unigene31634_NK	1080	1375	59.8285	gi|432108553|gb|ELK33263.1|	483.4	8e-135	Proteasome subunit alpha type-6 [Myotis davidii]
Unigene6608_NK	1383	1760	59.8025	gi|327287500|ref|XP_003228467.1|	280.4	1e-73	PREDICTED: eukaryotic translation initiation factor 3 subunit J-like, partial [Anolis carolinensis]
Unigene29877_NK	433	551	59.7988	--	--	--	--
Unigene20840_NK	2640	3357	59.7553	gi|327267121|ref|XP_003218351.1|	1680.2	0	PREDICTED: coatomer subunit beta&apos;-like [Anolis carolinensis]
Unigene30986_NK	550	699	59.7232	--	--	--	--
CL3230.Contig2_NK	462	587	59.707	--	--	--	--
Unigene42_NK	2962	3763	59.7005	gi|327288522|ref|XP_003228975.1|	1345.1	0	PREDICTED: furin-like [Anolis carolinensis]
Unigene31676_NK	904	1148	59.6764	gi|363742279|ref|XP_001233592.2|	238.8	2e-61	PREDICTED: 28S ribosomal protein S15, mitochondrial-like [Gallus gallus]
CL2319.Contig2_NK	435	552	59.6319	gi|327265789|ref|XP_003217690.1|	138.3	1e-31	PREDICTED: 60S ribosomal protein L29-like [Anolis carolinensis]
Unigene14169_NK	1276	1619	59.6245	gi|327282499|ref|XP_003225980.1|	528.9	2e-148	PREDICTED: transcription factor HES-1-like isoform 1 [Anolis carolinensis]
Unigene26866_NK	1656	2099	59.5636	gi|327268393|ref|XP_003218982.1|	113.2	4e-23	PREDICTED: non-histone chromosomal protein HMG-14-like [Anolis carolinensis]
Unigene15550_NK	519	657	59.4877	--	--	--	--
Unigene24520_NK	1048	1326	59.4581	gi|294292743|gb|ADE62144.1|	294.7	5e-78	calfacilitin [Gallus gallus]
Unigene23621_NK	1686	2133	59.4514	--	--	--	--
Unigene6638_NK	1748	2208	59.359	gi|301768957|ref|XP_002919926.1|	196.4	4e-48	PREDICTED: hypothetical protein LOC100478075 [Ailuropoda melanoleuca]
Unigene29021_NK	232	293	59.3483	--	--	--	--
Unigene13459_NK	633	799	59.316	--	--	--	--
Unigene19893_NK	2717	3429	59.3071	gi|406829595|gb|AFS63890.1|	811.2	0	HSP40A1 [Thamnophis elegans]
Unigene29687_NK	1182	1491	59.2774	--	--	--	--
Unigene30690_NK	241	304	59.2769	--	--	--	--
Unigene20544_NK	444	560	59.2699	--	--	--	--
Unigene6543_NK	234	295	59.2427	--	--	--	--
Unigene31674_NK	541	682	59.2401	gi|327286002|ref|XP_003227720.1|	159.8	5e-38	PREDICTED: cytochrome c oxidase subunit 6B1-like [Anolis carolinensis]
Unigene20907_NK	910	1147	59.2313	--	--	--	--
Unigene30534_NK	611	770	59.2214	--	--	--	--
Unigene31747_NK	302	380	59.1297	--	--	--	--
CL4154.Contig2_NK	372	468	59.1196	--	--	--	--
Unigene20120_NK	353	444	59.1068	gi|432098146|gb|ELK28033.1|	118.6	8e-26	Alpha-enolase [Myotis davidii]
Unigene13724_NK	1657	2083	59.0739	gi|449280729|gb|EMC87965.1|	720.3	0	Legumain [Columba livia]
Unigene29751_NK	2182	2742	59.0529	gi|327277364|ref|XP_003223435.1|	855.5	0	PREDICTED: H/ACA ribonucleoprotein complex subunit 4-like [Anolis carolinensis]
Unigene30426_NK	3625	4554	59.0356	gi|327263249|ref|XP_003216433.1|	1309.3	0	PREDICTED: neuroendocrine convertase 1-like [Anolis carolinensis]
Unigene25646_NK	262	329	59.0097	--	--	--	--
Unigene30415_NK	1563	1958	58.8684	gi|327259701|ref|XP_003214674.1|	352.1	5e-95	PREDICTED: CD82 antigen-like, partial [Anolis carolinensis]
CL1424.Contig1_NK	483	605	58.8623	gi|395505763|ref|XP_003757207.1|	57.4	2e-07	PREDICTED: zinc finger protein 91-like [Sarcophilus harrisii]
Unigene25327_NK	347	434	58.7745	--	--	--	--
Unigene20746_NK	1338	1672	58.7231	gi|327262137|ref|XP_003215882.1|	286.2	2e-75	PREDICTED: vesicle transport protein SFT2A-like [Anolis carolinensis]
Unigene31607_NK	1890	2357	58.6039	gi|327279843|ref|XP_003224665.1|	982.6	0	PREDICTED: t-complex protein 1 subunit beta-like [Anolis carolinensis]
Unigene31735_NK	281	350	58.5316	--	--	--	--
Unigene30808_NK	208	259	58.5147	gi|408816336|dbj|BAM62877.1|	55.5	9e-07	L1-encoded reverse transcriptase-like protein [Trimeresurus flavoviridis]
Unigene20416_NK	1540	1916	58.466	gi|327265569|ref|XP_003217580.1|	418.7	4e-115	PREDICTED: protein canopy homolog 3-like [Anolis carolinensis]
Unigene27550_NK	1655	2058	58.4354	gi|327273896|ref|XP_003221715.1|	641.7	0	PREDICTED: zinc finger protein 330-like [Anolis carolinensis]
Unigene14118_NK	2231	2773	58.4089	gi|327263756|ref|XP_003216683.1|	993	0	PREDICTED: alpha-globin transcription factor CP2-like isoform 1 [Anolis carolinensis]
Unigene15694_NK	207	257	58.3434	--	--	--	--
Unigene20218_NK	466	577	58.186	--	--	--	--
CL414.Contig6_NK	215	266	58.1396	--	--	--	--
Unigene23860_NK	543	671	58.07	--	--	--	--
Unigene25511_NK	1824	2252	58.0193	gi|327279853|ref|XP_003224670.1|	407.9	9e-112	PREDICTED: transmembrane BAX inhibitor motif-containing protein 4-like [Anolis carolinensis]
Unigene206_NK	941	1160	57.9292	gi|327269328|ref|XP_003219446.1|	337.4	6e-91	PREDICTED: NADH dehydrogenase [ubiquinone] 1 beta subcomplex subunit 9-like [Anolis carolinensis]
Unigene31645_NK	928	1142	57.8292	gi|307202987|gb|EFN82203.1|	68.6	5e-10	hypothetical protein EAI_05149 [Harpegnathos saltator]
Unigene29126_NK	616	757	57.7489	--	--	--	--
Unigene26795_NK	452	555	57.701	--	--	--	--
Unigene14165_NK	1299	1593	57.6283	--	--	--	--
Unigene13626_NK	1095	1341	57.5498	gi|187608308|ref|NP_001120000.1|	488.4	2e-136	succinate dehydrogenase [ubiquinone] iron-sulfur subunit, mitochondrial precursor [Xenopus (Silurana) tropicalis] >gi|205831551|sp|B0BM36.1|DHSB_XENTR RecName: Full=Succinate dehydrogenase [ubiquinone] iron-sulfur subunit, mitochondrial; AltName: Full=Iron-sulfur subunit of complex II; Short=Ip; Flags: Precursor >gi|165971096|gb|AAI58271.1| sdhb protein [Xenopus (Silurana) tropicalis]
CL1816.Contig1_NK	577	706	57.4987	--	--	--	--
Unigene24202_NK	2145	2624	57.4864	gi|66392162|ref|NP_001006220.2|	887.1	0	unconventional myosin-Ic [Gallus gallus] >gi|82082485|sp|Q5ZLA6.1|MYO1C_CHICK RecName: Full=Unconventional myosin-Ic; AltName: Full=Myosin I beta; Short=MMI-beta; Short=MMIb
Unigene11079_NK	1654	2023	57.4764	gi|363740921|ref|XP_001232393.2|	438.3	5e-121	PREDICTED: THO complex subunit 4 [Gallus gallus]
Unigene13595_NK	701	857	57.4502	gi|224054809|ref|XP_002192369.1|	328.2	2e-88	PREDICTED: protein CNPPD1 [Taeniopygia guttata]
CL2556.Contig1_NK	501	612	57.4041	gi|327271961|ref|XP_003220755.1|	58.5	1e-07	PREDICTED: hypothetical protein LOC100560777 [Anolis carolinensis]
Unigene29011_NK	330	403	57.3879	--	--	--	--
Unigene20721_NK	222	271	57.3648	--	--	--	--
CL1336.Contig2_NK	290	354	57.3633	--	--	--	--
Unigene30947_NK	843	1029	57.361	--	--	--	--
Unigene6481_NK	1165	1422	57.3591	gi|327264194|ref|XP_003216900.1|	510.4	7e-143	PREDICTED: dolichyl-phosphate beta-glucosyltransferase-like [Anolis carolinensis]
Unigene20673_NK	1234	1505	57.3126	--	--	--	--
Unigene31678_NK	911	1110	57.2576	gi|327281020|ref|XP_003225248.1|	354.8	3e-96	PREDICTED: peroxiredoxin-2-like [Anolis carolinensis]
Unigene15226_NK	1972	2400	57.1917	gi|327277123|ref|XP_003223315.1|	573.2	1e-161	PREDICTED: growth hormone-inducible transmembrane protein-like [Anolis carolinensis]
Unigene19131_NK	544	662	57.1858	gi|57530169|ref|NP_001006433.1|	214.5	1e-54	cleavage stimulation factor subunit 2 [Gallus gallus]
Unigene27659_NK	365	444	57.1635	gi|471409893|ref|XP_004386519.1|	70.1	3e-11	PREDICTED: melanophilin [Trichechus manatus latirostris]
Unigene20302_NK	768	934	57.1498	--	--	--	--
Unigene20501_NK	1406	1708	57.0862	gi|327260344|ref|XP_003214994.1|	502.3	2e-140	PREDICTED: transmembrane BAX inhibitor motif-containing protein 1-like [Anolis carolinensis]
Unigene20514_NK	3581	4349	57.0708	gi|327264589|ref|XP_003217095.1|	47.8	0	PREDICTED: brain-specific angiogenesis inhibitor 1-associated protein 2-like isoform 3 [Anolis carolinensis]
CL9.Contig1_NK	1223	1484	57.0212	gi|327281137|ref|XP_003225306.1|	103.2	2e-20	PREDICTED: hypothetical protein LOC100551555 [Anolis carolinensis]
Unigene25090_NK	217	263	56.9541	gi|466039204|ref|XP_004275966.1|	97.1	2e-19	PREDICTED: integrin beta-1 isoform 2 [Orcinus orca] >gi|470620942|ref|XP_004318627.1| PREDICTED: integrin beta-1-like [Tursiops truncatus]
Unigene31641_NK	819	991	56.8615	gi|471365328|ref|XP_004373205.1|	325.9	1e-87	PREDICTED: ribosome biogenesis protein TSR3 homolog [Trichechus manatus latirostris]
CL1694.Contig1_NK	1987	2404	56.8546	gi|327260842|ref|XP_003215242.1|	993.4	0	PREDICTED: LOW QUALITY PROTEIN: t-complex protein 1 subunit delta-like [Anolis carolinensis]
Unigene861_NK	949	1148	56.8466	--	--	--	--
Unigene15106_NK	1022	1236	56.8325	gi|327283729|ref|XP_003226593.1|	239.2	2e-61	PREDICTED: NADH dehydrogenase [ubiquinone] 1 beta subcomplex subunit 8, mitochondrial-like [Anolis carolinensis]
Unigene30028_NK	1420	1717	56.8213	--	--	--	--
Unigene29068_NK	2511	3036	56.8177	gi|327266654|ref|XP_003218119.1|	1130.2	0	PREDICTED: complement C4-B-like, partial [Anolis carolinensis]
Unigene31266_NK	340	411	56.8057	gi|213383|gb|AAA49389.1|	69.3	6e-11	MHC class I protein, partial [Nerodia sipedon]
Unigene13521_NK	516	623	56.7371	--	--	--	--
Unigene31790_NK	277	334	56.6625	gi|465972071|gb|EMP32931.1|	116.7	3e-25	Malate dehydrogenase, cytoplasmic [Chelonia mydas]
CL4403.Contig1_NK	540	651	56.6521	gi|327278653|ref|XP_003224075.1|	92.8	8e-18	PREDICTED: complement decay-accelerating factor-like [Anolis carolinensis]
Unigene29795_NK	487	587	56.6419	--	--	--	--
Unigene6473_NK	1653	1992	56.6298	gi|327264613|ref|XP_003217107.1|	657.9	0	PREDICTED: dnaJ homolog subfamily B member 1-like [Anolis carolinensis]
Unigene28459_NK	671	808	56.5871	--	--	--	--
Unigene29407_NK	421	506	56.4803	--	--	--	--
Unigene24571_NK	1156	1388	56.4236	--	--	--	--
Unigene29742_NK	1416	1700	56.4176	gi|71896525|ref|NP_001025507.1|	478.4	4e-133	iroquois-class homeodomain protein IRX-2 [Gallus gallus] >gi|6018441|emb|CAB57948.1| iroquois homologue 2 [Gallus gallus]
CL1545.Contig1_NK	594	713	56.4069	gi|270016943|gb|EFA13389.1|	95.9	1e-18	hypothetical protein TcasGA2_TC012886 [Tribolium castaneum]
Unigene13688_NK	1463	1754	56.3397	gi|327287520|ref|XP_003228477.1|	544.3	6e-153	PREDICTED: RNA-binding protein NOB1-like [Anolis carolinensis]
Unigene30527_NK	1585	1900	56.3317	--	--	--	--
Unigene22986_NK	1451	1739	56.3198	gi|395853654|ref|XP_003799319.1|	98.2	1e-18	PREDICTED: U5 small nuclear ribonucleoprotein 200 kDa helicase [Otolemur garnettii]
Unigene15651_NK	1344	1610	56.2931	gi|327283929|ref|XP_003226692.1|	66.6	3e-09	PREDICTED: eukaryotic translation initiation factor 3 subunit A-like [Anolis carolinensis]
Unigene31719_NK	955	1144	56.2926	gi|395508778|ref|XP_003758686.1|	233.8	9e-60	PREDICTED: E3 ubiquitin-protein ligase RNF181-like isoform 1 [Sarcophilus harrisii]
Unigene27709_NK	258	309	56.2818	--	--	--	--
Unigene28564_NK	314	376	56.2713	--	--	--	--
Unigene24097_NK	550	658	56.2202	--	--	--	--
Unigene14164_NK	434	519	56.1961	--	--	--	--
Unigene1081_NK	815	974	56.1604	gi|4378025|gb|AAD19348.1|	85.9	2e-15	reverse transcriptase-like protein [Takifugu rubripes]
Unigene15596_NK	1397	1669	56.1421	gi|327288294|ref|XP_003228863.1|	675.6	0	PREDICTED: neuroepithelial cell-transforming gene 1 protein-like [Anolis carolinensis]
Unigene28653_NK	3735	4462	56.1394	gi|327260486|ref|XP_003215065.1|	995.3	0	PREDICTED: 182 kDa tankyrase-1-binding protein-like [Anolis carolinensis]
Unigene7673_NK	1009	1205	56.1209	gi|291410735|ref|XP_002721651.1|	518.5	2e-145	PREDICTED: proteasome alpha 4 subunit-like [Oryctolagus cuniculus]
Unigene31596_NK	1072	1280	56.1105	gi|147903495|ref|NP_001087454.1|	115.2	6e-24	cytochrome c oxidase subunit VIIb [Xenopus laevis] >gi|50925080|gb|AAH79809.1| MGC86432 protein [Xenopus laevis]
CL5656.Contig2_NK	2412	2878	56.0715	gi|327290543|ref|XP_003229982.1|	385.2	9e-105	PREDICTED: transmembrane protein 79-like [Anolis carolinensis]
Unigene25647_NK	3246	3871	56.0407	gi|327263665|ref|XP_003216638.1|	761.1	0	PREDICTED: ceramide glucosyltransferase-like [Anolis carolinensis]
Unigene23806_NK	1009	1203	56.0278	gi|71895411|ref|NP_001025768.1|	515.4	1e-144	coatomer subunit gamma [Gallus gallus]
Unigene31632_NK	1088	1297	56.0196	--	--	--	--
Unigene20179_NK	2383	2839	55.9848	gi|327284992|ref|XP_003227219.1|	373.2	3e-101	PREDICTED: claudin-4-like [Anolis carolinensis]
Unigene23367_NK	377	449	55.9672	--	--	--	--
Unigene20918_NK	223	265	55.8431	--	--	--	--
Unigene15670_NK	1158	1376	55.8391	gi|306482635|ref|NP_001182353.1|	389.4	1e-106	ubiquitin-conjugating enzyme E2 E3 [Gallus gallus] >gi|449267824|gb|EMC78722.1| Ubiquitin-conjugating enzyme E2 E3 [Columba livia]
Unigene24016_NK	993	1179	55.7948	--	--	--	--
CL932.Contig2_NK	873	1036	55.7666	gi|21595392|gb|AAH32452.1|	218.8	2e-55	IGL@ protein [Homo sapiens]
Unigene29860_NK	461	547	55.759	--	--	--	--
Unigene23147_NK	3551	4209	55.7002	gi|363740684|ref|XP_415646.3|	537.7	1e-150	PREDICTED: target of myb1 (chicken)-like 1 [Gallus gallus]
Unigene24562_NK	764	905	55.6652	gi|327264087|ref|XP_003216848.1|	321.6	2e-86	PREDICTED: transmembrane protein 39A-like [Anolis carolinensis]
Unigene31161_NK	464	549	55.6011	gi|465987892|gb|EMP37540.1|	325.1	6e-88	hypothetical protein UY3_05254 [Chelonia mydas]
Unigene20919_NK	912	1078	55.546	--	--	--	--
Unigene25580_NK	873	1031	55.4975	gi|327272436|ref|XP_003220991.1|	393.3	8e-108	PREDICTED: ras-related C3 botulinum toxin substrate 2-like [Anolis carolinensis]
Unigene464_NK	885	1045	55.4884	--	--	--	--
Unigene25382_NK	2163	2554	55.4873	gi|465977331|gb|EMP34723.1|	527.7	9e-148	EF-hand calcium-binding domain-containing protein 4A [Chelonia mydas]
Unigene1033_NK	1108	1308	55.4749	gi|345319695|ref|XP_001511111.2|	355.5	2e-96	PREDICTED: cell growth-regulating nucleolar protein-like [Ornithorhynchus anatinus]
Unigene29529_NK	1757	2073	55.4442	gi|327289962|ref|XP_003229693.1|	283.9	1e-74	PREDICTED: antigen peptide transporter 1-like, partial [Anolis carolinensis]
CL5551.Contig2_NK	3892	4590	55.4203	gi|327286741|ref|XP_003228088.1|	745.3	0	PREDICTED: neutral amino acid transporter B(0)-like [Anolis carolinensis]
Unigene6865_NK	475	560	55.4017	gi|51011001|ref|NP_001003456.1|	188.7	7e-47	thioredoxin domain-containing protein 17 [Danio rerio] >gi|82182092|sp|Q6DBT3.1|TXD17_DANRE RecName: Full=Thioredoxin domain-containing protein 17; AltName: Full=Thioredoxin-like protein 5 >gi|50418108|gb|AAH78373.1| Thioredoxin domain containing 17 [Danio rerio] >gi|182889312|gb|AAI64925.1| Txndc17 protein [Danio rerio]
Unigene18543_NK	1185	1397	55.3996	gi|126329432|ref|XP_001373765.1|	301.2	6e-80	PREDICTED: calmodulin-like [Monodelphis domestica]
Unigene6471_NK	1490	1754	55.3187	gi|327260394|ref|XP_003215019.1|	689.9	0	PREDICTED: serine/threonine-protein phosphatase PP1-alpha catalytic subunit-like isoform 1 [Anolis carolinensis]
Unigene29117_NK	339	399	55.3098	gi|4239700|emb|CAA10770.1|	80.9	2e-14	reverse transcriptase-like [Bos taurus]
Unigene11044_NK	1111	1307	55.2828	--	--	--	--
Unigene15262_NK	4413	5188	55.2452	gi|327289598|ref|XP_003229511.1|	2548.5	0	PREDICTED: ras GTPase-activating-like protein IQGAP1-like isoform 1 [Anolis carolinensis]
Unigene25609_NK	496	583	55.2352	--	--	--	--
CL1192.Contig1_NK	1308	1537	55.2198	gi|327260614|ref|XP_003215129.1|	327.4	1e-87	PREDICTED: glutathione S-transferase P-like [Anolis carolinensis]
Unigene24109_NK	1140	1339	55.1956	gi|118082712|ref|XP_001234246.1|	221.9	5e-56	PREDICTED: mitochondrial import receptor subunit TOM22 homolog [Gallus gallus]
Unigene28829_NK	219	257	55.1465	--	--	--	--
Unigene25659_NK	929	1090	55.1366	gi|377652338|ref|NP_001185921.1|	277.3	7e-73	basigin isoform 2 precursor [Gallus gallus]
CL1145.Contig1_NK	1509	1767	55.027	gi|327280252|ref|XP_003224866.1|	370.5	1e-100	PREDICTED: regulator of G-protein signaling 2-like [Anolis carolinensis]
Unigene19325_NK	1130	1321	54.9355	gi|327280484|ref|XP_003224982.1|	491.9	2e-137	PREDICTED: rRNA 2&apos;-O-methyltransferase fibrillarin-like [Anolis carolinensis]
Unigene29077_NK	682	797	54.9165	gi|327266654|ref|XP_003218119.1|	208.4	2e-52	PREDICTED: complement C4-B-like, partial [Anolis carolinensis]
Unigene31244_NK	4342	5071	54.8823	gi|208610021|ref|NP_001129149.1|	1076.6	0	eukaryotic peptide chain release factor GTP-binding subunit ERF3A [Gallus gallus]
Unigene21364_NK	323	377	54.8489	--	--	--	--
Unigene20581_NK	564	658	54.8246	gi|2331059|gb|AAC60281.1|	88.6	1e-16	unknown [Gallus gallus]
Unigene29555_NK	216	252	54.8246	--	--	--	--
Unigene20497_NK	501	584	54.7777	--	--	--	--
Unigene27799_NK	1687	1964	54.7086	gi|327270195|ref|XP_003219875.1|	703	0	PREDICTED: zinc transporter ZIP6-like [Anolis carolinensis]
Unigene28831_NK	1015	1181	54.678	gi|344253003|gb|EGW09107.1|	298.1	4e-79	Proteasome subunit beta type-9 [Cricetulus griseus]
Unigene27633_NK	418	486	54.6373	gi|327286295|ref|XP_003227866.1|	195.3	7e-49	PREDICTED: protein cornichon homolog isoform 1 [Anolis carolinensis]
CL555.Contig2_NK	933	1083	54.5476	gi|408816336|dbj|BAM62877.1|	56.6	2e-06	L1-encoded reverse transcriptase-like protein [Trimeresurus flavoviridis]
Unigene28606_NK	1364	1582	54.5031	--	--	--	--
Unigene391_NK	1321	1532	54.4985	--	--	--	--
Unigene30926_NK	228	264	54.4124	--	--	--	--
Unigene29408_NK	345	399	54.3479	--	--	--	--
Unigene31654_NK	2939	3396	54.2996	gi|327261026|ref|XP_003215333.1|	1249.2	0	PREDICTED: stress-70 protein, mitochondrial-like [Anolis carolinensis]
Unigene24902_NK	460	531	54.2457	--	--	--	--
CL4239.Contig1_NK	441	509	54.2386	--	--	--	--
Unigene15734_NK	1184	1366	54.2161	gi|327289213|ref|XP_003229319.1|	479.2	1e-133	PREDICTED: cathepsin S-like [Anolis carolinensis]
Unigene574_NK	1333	1537	54.1842	gi|327264009|ref|XP_003216809.1|	470.7	7e-131	PREDICTED: far upstream element-binding protein 2-like [Anolis carolinensis]
Unigene14621_NK	451	520	54.1821	--	--	--	--
Unigene30105_NK	447	515	54.1413	gi|301619422|ref|XP_002939094.1|	181.8	8e-45	PREDICTED: uncharacterized protein K02A2.6-like [Xenopus (Silurana) tropicalis]
Unigene29506_NK	648	746	54.0994	--	--	--	--
Unigene15026_NK	880	1013	54.0948	gi|395504817|ref|XP_003756743.1|	438	2e-121	PREDICTED: protein YIPF5 [Sarcophilus harrisii]
Unigene6850_NK	253	291	54.0507	--	--	--	--
CL1558.Contig2_NK	1299	1494	54.0468	gi|327285292|ref|XP_003227368.1|	520.8	6e-146	PREDICTED: LOW QUALITY PROTEIN: cathepsin Z-like [Anolis carolinensis]
Unigene6500_NK	1022	1175	54.0276	--	--	--	--
Unigene6498_NK	423	486	53.9914	--	--	--	--
Unigene31781_NK	222	255	53.9779	--	--	--	--
Unigene31820_NK	249	286	53.9754	--	--	--	--
Unigene496_NK	415	476	53.8999	--	--	--	--
Unigene6499_NK	561	643	53.8613	gi|350539257|ref|NP_001232367.1|	221.1	2e-56	putative TAF10 RNA polymerase II [Taeniopygia guttata] >gi|197128188|gb|ACH44686.1| putative TAF10 RNA polymerase II [Taeniopygia guttata] >gi|197128189|gb|ACH44687.1| putative TAF10 RNA polymerase II [Taeniopygia guttata]
Unigene29610_NK	260	298	53.8607	--	--	--	--
Unigene6497_NK	960	1100	53.8456	gi|327281681|ref|XP_003225575.1|	444.9	2e-123	PREDICTED: eukaryotic translation initiation factor 4E-like isoform 1 [Anolis carolinensis]
Unigene27753_NK	1277	1463	53.8372	gi|465973171|gb|EMP33301.1|	675.2	0	Calcium-binding protein 39 [Chelonia mydas]
Unigene25665_NK	316	362	53.8332	--	--	--	--
Unigene29294_NK	787	901	53.7996	--	--	--	--
Unigene25108_NK	1584	1812	53.7566	gi|327264609|ref|XP_003217105.1|	520.8	8e-146	PREDICTED: hepatocyte growth factor-regulated tyrosine kinase substrate-like isoform 4 [Anolis carolinensis]
Unigene23385_NK	932	1066	53.749	--	--	--	--
Unigene15547_NK	1190	1361	53.7452	--	--	--	--
Unigene15640_NK	1648	1884	53.7221	gi|327278621|ref|XP_003224059.1|	778.5	0	PREDICTED: MAP kinase-activated protein kinase 2-like [Anolis carolinensis]
Unigene30099_NK	765	874	53.6882	gi|408816336|dbj|BAM62877.1|	48.1	3e-28	L1-encoded reverse transcriptase-like protein [Trimeresurus flavoviridis]
Unigene24517_NK	394	450	53.6717	gi|466001863|gb|EMP41610.1|	147.5	1e-34	Protein transport protein Sec24A [Chelonia mydas]
Unigene274_NK	299	341	53.5935	gi|301622748|ref|XP_002940691.1|	30	9e-07	PREDICTED: hypothetical protein LOC100485130 [Xenopus (Silurana) tropicalis]
Unigene28759_NK	848	966	53.5316	gi|344248933|gb|EGW05037.1|	505.8	1e-141	COP9 signalosome complex subunit 6 [Cricetulus griseus]
Unigene15393_NK	2537	2890	53.5311	gi|4506025|ref|NP_000936.1|	341.7	1e-91	calcineurin subunit B type 1 [Homo sapiens] >gi|8394036|ref|NP_059005.1| calcineurin subunit B type 1 [Rattus norvegicus] >gi|27807055|ref|NP_777008.1| calcineurin subunit B type 1 [Bos taurus] >gi|45361647|ref|NP_989400.1| calcineurin subunit B type 1 [Xenopus (Silurana) tropicalis] >gi|45383404|ref|NP_989707.1| calcineurin subunit B type 1 [Gallus gallus] >gi|52218952|ref|NP_001004553.1| protei…
Unigene28761_NK	745	848	53.4895	gi|224070057|ref|XP_002197536.1|	93.6	1e-17	PREDICTED: poly(A)-specific ribonuclease PARN [Taeniopygia guttata]
CL2665.Contig1_NK	566	644	53.4685	gi|449496701|ref|XP_002188099.2|	361.3	1e-98	PREDICTED: heterogeneous nuclear ribonucleoprotein U [Taeniopygia guttata]
Unigene377_NK	262	298	53.4495	--	--	--	--
Unigene30419_NK	233	265	53.4464	--	--	--	--
Unigene30716_NK	554	630	53.4392	gi|334327507|ref|XP_001380174.2|	236.9	3e-61	PREDICTED: protein NipSnap homolog 1-like [Monodelphis domestica]
Unigene20859_NK	2622	2981	53.4267	gi|449498881|ref|XP_002190863.2|	1024.2	0	PREDICTED: sodium- and chloride-dependent neutral and basic amino acid transporter B(0+) [Taeniopygia guttata]
Unigene25238_NK	1363	1549	53.4053	gi|449508019|ref|XP_002192339.2|	75.1	9e-12	PREDICTED: complement factor H [Taeniopygia guttata]
Unigene24610_NK	2265	2574	53.4034	gi|449282060|gb|EMC88969.1|	1154.8	0	Amyloid protein-binding protein 2 [Columba livia]
Unigene20697_NK	2128	2418	53.3966	gi|363733673|ref|XP_420881.3|	639	0	PREDICTED: solute carrier family 4, sodium borate transporter, member 11 [Gallus gallus]
Unigene20885_NK	2473	2809	53.3773	gi|449496294|ref|XP_002192941.2|	909.1	0	PREDICTED: echinoderm microtubule-associated protein-like 4 [Taeniopygia guttata]
Unigene24677_NK	752	854	53.3665	gi|327278500|ref|XP_003224000.1|	384	3e-105	PREDICTED: probable ATP-dependent RNA helicase DDX46-like [Anolis carolinensis]
Unigene29889_NK	1851	2102	53.3648	gi|465954015|gb|EMP25665.1|	577.8	6e-163	MAP7 domain-containing protein 2, partial [Chelonia mydas]
Unigene31695_NK	590	670	53.3644	gi|327271225|ref|XP_003220388.1|	356.3	5e-97	PREDICTED: u1 small nuclear ribonucleoprotein C-like [Anolis carolinensis]
Unigene30885_NK	205	232	53.1818	--	--	--	--
Unigene23171_NK	403	456	53.1727	--	--	--	--
Unigene15013_NK	1671	1889	53.1232	gi|327264939|ref|XP_003217266.1|	756.5	0	PREDICTED: UPF0663 transmembrane protein C17orf28 homolog [Anolis carolinensis]
Unigene27881_NK	1417	1601	53.0946	--	--	--	--
Unigene18241_NK	355	401	53.0817	gi|449269993|gb|EMC80722.1|	77	2e-13	Eukaryotic translation initiation factor 1b, partial [Columba livia]
Unigene25676_NK	3216	3628	53.0127	gi|363740121|ref|XP_415212.3|	862.1	0	PREDICTED: sushi domain-containing protein 2 [Gallus gallus]
Unigene15727_NK	968	1092	53.0122	gi|351702314|gb|EHB05233.1|	391.3	3e-107	Oligoribonuclease, mitochondrial [Heterocephalus glaber]
Unigene22_NK	573	646	52.9794	--	--	--	--
Unigene31431_NK	410	462	52.9526	--	--	--	--
CL1040.Contig2_NK	300	338	52.9449	gi|327268890|ref|XP_003219228.1|	57.4	2e-07	PREDICTED: target of Nesh-SH3-like [Anolis carolinensis]
Unigene23396_NK	1993	2245	52.9344	gi|327281900|ref|XP_003225683.1|	770	0	PREDICTED: rho GTPase-activating protein 18-like [Anolis carolinensis]
Unigene6519_NK	603	679	52.9153	gi|395737653|ref|XP_002817330.2|	280.8	2e-74	PREDICTED: RWD domain-containing protein 1, partial [Pongo abelii]
CL1439.Contig1_NK	1281	1441	52.862	gi|327280914|ref|XP_003225196.1|	301.2	7e-80	PREDICTED: stromal cell-derived factor 2-like protein 1-like [Anolis carolinensis]
Unigene24432_NK	651	732	52.8395	--	--	--	--
Unigene23784_NK	364	409	52.8021	--	--	--	--
Unigene29118_NK	809	909	52.8013	gi|471380581|ref|XP_004378086.1|	172.9	1e-41	PREDICTED: protein phosphatase 1 regulatory subunit 1B [Trichechus manatus latirostris]
Unigene686_NK	2518	2828	52.778	gi|327284771|ref|XP_003227109.1|	788.5	0	PREDICTED: macrophage erythroblast attacher-like isoform 1 [Anolis carolinensis]
Unigene25684_NK	1981	2224	52.7569	gi|327269677|ref|XP_003219619.1|	688.7	0	PREDICTED: zinc finger and BTB domain-containing protein 10-like [Anolis carolinensis]
Unigene29416_NK	304	341	52.712	--	--	--	--
Unigene15132_NK	1639	1836	52.6408	gi|327285920|ref|XP_003227679.1|	610.5	8e-173	PREDICTED: methyltransferase-like protein 9-like [Anolis carolinensis]
Unigene25500_NK	1060	1187	52.6228	gi|327286675|ref|XP_003228055.1|	511.1	3e-143	PREDICTED: HIV Tat-specific factor 1-like [Anolis carolinensis]
Unigene31655_NK	554	620	52.5909	gi|449282893|gb|EMC89628.1|	53.1	7e-06	Immunoglobulin G-binding protein A, partial [Columba livia]
Unigene31698_NK	966	1081	52.5869	--	--	--	--
Unigene20262_NK	244	273	52.5777	--	--	--	--
Unigene31543_NK	2859	3197	52.5481	gi|327265172|ref|XP_003217382.1|	715.7	0	PREDICTED: forkhead box protein I1-ema-like [Anolis carolinensis]
Unigene7159_NK	1621	1812	52.5296	gi|57525333|ref|NP_001006225.1|	861.7	0	26S protease regulatory subunit 7 [Gallus gallus]
Unigene6522_NK	616	688	52.4852	gi|327279478|ref|XP_003224483.1|	258.5	1e-67	PREDICTED: keratin, type II cytoskeletal 8-like [Anolis carolinensis]
Unigene20765_NK	1163	1297	52.407	gi|401430149|ref|XP_003886486.1|	55.1	8e-06	unnamed protein product, partial [Leishmania mexicana MHOM/GT/2001/U1103] >gi|356491245|emb|CBZ41040.1| unnamed protein product, partial [Leishmania mexicana MHOM/GT/2001/U1103]
Unigene29302_NK	499	556	52.3604	--	--	--	--
Unigene6476_NK	1598	1779	52.3152	gi|327280260|ref|XP_003224870.1|	315.8	4e-84	PREDICTED: protein MAL2-like [Anolis carolinensis]
CL3948.Contig1_NK	2769	3082	52.3044	gi|440903772|gb|ELR54384.1|	131.3	2e-28	HERV-K_6q14.1 provirus ancestral Gag polyprotein, partial [Bos grunniens mutus]
Unigene24884_NK	1980	2200	52.2139	gi|148697591|gb|EDL29538.1|	546.6	1e-153	glutamate receptor, ionotropic, N-methyl D-asparate-associated protein 1 (glutamate binding), isoform CRA_c [Mus musculus]
Unigene15482_NK	1370	1519	52.1034	gi|465951204|gb|EMP24223.1|	463	1e-128	Cathepsin L1 [Chelonia mydas]
Unigene24914_NK	553	613	52.0912	gi|327278629|ref|XP_003224063.1|	59.7	8e-08	PREDICTED: 6-phosphofructo-2-kinase/fructose-2,6-biphosphatase 2-like [Anolis carolinensis]
Unigene6514_NK	325	360	52.0533	--	--	--	--
Unigene24743_NK	1924	2130	52.024	gi|60302774|ref|NP_001012581.1|	1016.5	0	T-complex protein 1 subunit epsilon [Gallus gallus]
Unigene29233_NK	215	238	52.0196	--	--	--	--
Unigene31625_NK	1276	1412	52.0011	gi|57530593|ref|NP_001006339.1|	531.9	2e-149	coatomer subunit epsilon [Gallus gallus] >gi|75571230|sp|Q5ZIK9.1|COPE_CHICK RecName: Full=Coatomer subunit epsilon; AltName: Full=Epsilon-coat protein; Short=Epsilon-COP
Unigene30805_NK	245	271	51.9795	--	--	--	--
Unigene6480_NK	2310	2551	51.8952	gi|327262105|ref|XP_003215866.1|	1112.4	0	PREDICTED: polypeptide N-acetylgalactosaminyltransferase 2-like [Anolis carolinensis]
Unigene27693_NK	1155	1273	51.7935	--	--	--	--
Unigene20111_NK	1109	1221	51.7384	gi|327290256|ref|XP_003229839.1|	124.4	1e-26	PREDICTED: LOW QUALITY PROTEIN: splicing factor 1-like [Anolis carolinensis]
Unigene28202_NK	253	278	51.6361	gi|327272748|ref|XP_003221146.1|	142.1	7e-33	PREDICTED: SCY1-like protein 2-like [Anolis carolinensis]
Unigene30911_NK	430	472	51.5825	--	--	--	--
Unigene30815_NK	370	405	51.4378	--	--	--	--
Unigene25072_NK	583	638	51.4258	--	--	--	--
CL1663.Contig1_NK	1604	1755	51.4164	gi|327260005|ref|XP_003214826.1|	600.1	1e-169	PREDICTED: transaldolase-like [Anolis carolinensis]
Unigene28754_NK	564	617	51.4085	--	--	--	--
Unigene26310_NK	630	689	51.3934	gi|327283747|ref|XP_003226602.1|	191.4	2e-47	PREDICTED: zyxin-like [Anolis carolinensis]
CL3939.Contig8_NK	1565	1710	51.3465	gi|188501739|gb|ACD54838.1|	430.6	1e-118	MHC class I antigen [Iguana iguana]
CL1700.Contig2_NK	373	407	51.276	gi|326933025|ref|XP_003212610.1|	34.7	1e-38	PREDICTED: chromatin modification-related protein MEAF6-like [Meleagris gallopavo]
Unigene136_NK	498	543	51.2388	gi|4378025|gb|AAD19348.1|	57.8	2e-07	reverse transcriptase-like protein [Takifugu rubripes]
Unigene27667_NK	588	641	51.2283	--	--	--	--
Unigene22882_NK	1223	1333	51.2192	--	--	--	--
Unigene28823_NK	346	377	51.2029	--	--	--	--
Unigene2_NK	883	961	51.1436	gi|390336705|ref|XP_001191426.2|	86.7	1e-15	PREDICTED: uncharacterized protein LOC755711 [Strongylocentrotus purpuratus]
CL5452.Contig1_NK	1808	1967	51.1252	--	--	--	--
Unigene20436_NK	1563	1700	51.1115	gi|470641444|ref|XP_004332677.1|	1083.2	0	PREDICTED: LOW QUALITY PROTEIN: PRP8 pre-mRNA processing factor 8 homolog (S. cerevisiae) [Tursiops truncatus]
Unigene27560_NK	1953	2124	51.1071	gi|363732907|ref|XP_420160.2|	410.2	2e-112	PREDICTED: protein YIPF6 [Gallus gallus]
Unigene31806_NK	549	597	51.1012	--	--	--	--
Unigene30361_NK	492	535	51.0996	--	--	--	--
Unigene14622_NK	1161	1262	51.0806	gi|327288895|ref|XP_003229160.1|	501.5	3e-140	PREDICTED: phosphoglycerate mutase 1-like [Anolis carolinensis]
Unigene25372_NK	476	517	51.0402	--	--	--	--
Unigene29739_NK	778	844	50.979	--	--	--	--
Unigene12854_NK	1906	2067	50.962	gi|327264742|ref|XP_003217170.1|	765.4	0	PREDICTED: soluble calcium-activated nucleotidase 1-like [Anolis carolinensis]
Unigene10006_NK	1848	2002	50.9086	gi|327265675|ref|XP_003217633.1|	647.9	0	PREDICTED: vesicular integral-membrane protein VIP36-like [Anolis carolinensis]
Unigene25730_NK	2052	2223	50.9086	gi|57529531|ref|NP_001006562.1|	1156	0	ATP-binding cassette sub-family F member 2 [Gallus gallus]
Unigene27812_NK	1454	1574	50.8709	gi|224064516|ref|XP_002194933.1|	792	0	PREDICTED: large neutral amino acids transporter small subunit 1 [Taeniopygia guttata]
Unigene27929_NK	2417	2616	50.8616	gi|327272416|ref|XP_003220981.1|	1432.5	0	PREDICTED: myosin-9-like [Anolis carolinensis]
Unigene14562_NK	377	408	50.8566	--	--	--	--
Unigene8352_NK	404	437	50.831	--	--	--	--
Unigene31256_NK	343	371	50.8287	--	--	--	--
CL192.Contig2_NK	1088	1175	50.7502	gi|327273205|ref|XP_003221371.1|	722.6	0	PREDICTED: neural Wiskott-Aldrich syndrome protein-like [Anolis carolinensis]
Unigene15296_NK	951	1027	50.748	gi|327276631|ref|XP_003223071.1|	281.6	4e-74	PREDICTED: signal recognition particle 19 kDa protein-like [Anolis carolinensis]
CL2971.Contig1_NK	1239	1338	50.7474	gi|326913161|ref|XP_003202909.1|	543.9	6e-153	PREDICTED: heat shock 70 kDa protein 13-like [Meleagris gallopavo]
Unigene14771_NK	303	327	50.7147	--	--	--	--
Unigene7152_NK	821	886	50.713	--	--	--	--
CL5236.Contig1_NK	317	342	50.6986	--	--	--	--
CL1397.Contig2_NK	242	261	50.682	--	--	--	--
Unigene29350_NK	538	580	50.6611	gi|301622748|ref|XP_002940691.1|	124.8	1e-27	PREDICTED: hypothetical protein LOC100485130 [Xenopus (Silurana) tropicalis]
Unigene29635_NK	1835	1978	50.6546	gi|26340996|dbj|BAC34160.1|	42.4	2e-13	unnamed protein product [Mus musculus]
Unigene8519_NK	2084	2246	50.6455	gi|50748422|ref|XP_421238.1|	984.6	0	PREDICTED: signal recognition particle 54 kDa protein isoform 2 [Gallus gallus] >gi|224051427|ref|XP_002200552.1| PREDICTED: signal recognition particle 54 kDa protein [Taeniopygia guttata]
Unigene25280_NK	434	467	50.5657	--	--	--	--
Unigene25418_NK	211	227	50.556	--	--	--	--
Unigene12152_NK	928	998	50.5372	gi|52138695|ref|NP_001004397.1|	512.7	1e-143	splicing factor 3A subunit 2 [Gallus gallus] >gi|51594275|gb|AAU08170.1| splicing factor 3a subunit 2 [Gallus gallus]
Unigene23057_NK	1398	1503	50.522	gi|118572616|sp|Q02084.2|A33_PLEWA	162.5	4e-38	RecName: Full=Zinc-binding protein A33 >gi|113413605|gb|AAA49614.2| Zn-binding protein [Pleurodeles waltl]
Unigene23592_NK	1662	1784	50.442	gi|327264463|ref|XP_003217033.1|	83.2	4e-14	PREDICTED: LOW QUALITY PROTEIN: LIM domain and actin-binding protein 1-like [Anolis carolinensis]
Unigene20427_NK	273	293	50.4352	--	--	--	--
Unigene23161_NK	661	709	50.405	gi|327276551|ref|XP_003223033.1|	175.6	1e-42	PREDICTED: membrane protein FAM174A-like [Anolis carolinensis]
Unigene20644_NK	624	669	50.3814	gi|327265298|ref|XP_003217445.1|	302.4	9e-81	PREDICTED: ubiquitin-conjugating enzyme E2 B-like [Anolis carolinensis]
Unigene101_NK	475	509	50.3562	gi|14285211|gb|AAK58879.1|AF355375_1	71.2	1e-11	putative reverse transcriptase [Takifugu rubripes]
Unigene6841_NK	489	524	50.356	gi|291403535|ref|XP_002717946.1|	123.6	3e-27	PREDICTED: mitochondrial ribosomal protein L52 [Oryctolagus cuniculus]
Unigene27466_NK	825	884	50.3532	--	--	--	--
Unigene30388_NK	2856	3058	50.3162	gi|327282652|ref|XP_003226056.1|	1220.7	0	PREDICTED: RING finger protein 10-like [Anolis carolinensis]
Unigene29760_NK	356	381	50.2926	gi|465961718|gb|EMP29444.1|	74.7	1e-12	Heat shock protein 75 kDa [Chelonia mydas]
Unigene27373_NK	2041	2182	50.239	gi|327283193|ref|XP_003226326.1|	941.8	0	PREDICTED: splicing factor, suppressor of white-apricot homolog [Anolis carolinensis]
Unigene26532_NK	306	327	50.2175	--	--	--	--
CL345.Contig2_NK	3854	4117	50.1993	gi|301787671|ref|XP_002929252.1|	149.1	1e-33	PREDICTED: LOW QUALITY PROTEIN: interleukin-4 receptor subunit alpha-like [Ailuropoda melanoleuca]
Unigene28918_NK	1018	1087	50.1777	gi|449278128|gb|EMC86095.1|	609	1e-172	Heterogeneous nuclear ribonucleoprotein U, partial [Columba livia]
Unigene6466_NK	547	584	50.1712	--	--	--	--
CL2240.Contig2_NK	1216	1298	50.1614	gi|327271037|ref|XP_003220294.1|	226.1	2e-57	PREDICTED: receptor-type tyrosine-protein phosphatase F-like [Anolis carolinensis]
Unigene13576_NK	554	591	50.131	--	--	--	--
Unigene25633_NK	652	695	50.0917	gi|327282894|ref|XP_003226177.1|	288.9	1e-76	PREDICTED: stromal interaction molecule 2-like [Anolis carolinensis]
Unigene20719_NK	1851	1973	50.0898	gi|126330223|ref|XP_001365849.1|	718	0	PREDICTED: KH domain-containing, RNA-binding, signal transduction-associated protein 1 isoform 1 [Monodelphis domestica]
Unigene13709_NK	1386	1477	50.0779	gi|327280380|ref|XP_003224930.1|	672.9	0	PREDICTED: protein SEC13 homolog [Anolis carolinensis]
CL5128.Contig1_NK	231	246	50.044	gi|25453145|sp|Q8JFB2.1|PA2I_LATSE	156.4	3e-37	RecName: Full=Phospholipase A2 GL16-1; AltName: Full=Phosphatidylcholine 2-acylhydrolase; AltName: Full=pkP5; Flags: Precursor >gi|21734658|dbj|BAC03245.1| phospholipase A2 [Laticauda semifasciata] >gi|21734662|dbj|BAC03247.1| phospholipase A2 [Laticauda semifasciata]
Unigene6645_NK	560	596	50.0135	--	--	--	--
Unigene23131_NK	327	348	50.0104	--	--	--	--
CL1830.Contig1_NK	2197	2336	49.9657	gi|327279262|ref|XP_003224376.1|	418.7	6e-115	PREDICTED: chloride channel protein 2-like [Anolis carolinensis]
Unigene20995_NK	938	997	49.9484	--	--	--	--
Unigene29397_NK	828	880	49.9438	--	--	--	--
Unigene15308_NK	1325	1408	49.9362	gi|471413066|ref|XP_004388081.1|	134.4	1e-29	PREDICTED: guanine nucleotide-binding protein G(k) subunit alpha [Trichechus manatus latirostris]
Unigene31733_NK	585	621	49.8844	gi|348544653|ref|XP_003459795.1|	361.3	1e-98	PREDICTED: ras-related protein Rab-1A-like isoform 1 [Oreochromis niloticus] >gi|410906535|ref|XP_003966747.1| PREDICTED: ras-related protein Rab-1A-like [Takifugu rubripes]
Unigene12445_NK	1761	1868	49.8478	gi|71895663|ref|NP_001026674.1|	268.9	6e-70	pleckstrin homology domain-containing family J member 1 [Gallus gallus] >gi|82197875|sp|Q5ZLT5.1|PKHJ1_CHICK RecName: Full=Pleckstrin homology domain-containing family J member 1; Short=PH domain-containing family J member 1
Unigene13771_NK	2719	2883	49.827	gi|327269436|ref|XP_003219500.1|	783.5	0	PREDICTED: antizyme inhibitor 1-like isoform 1 [Anolis carolinensis]
Unigene31631_NK	2899	3073	49.8131	gi|327286378|ref|XP_003227907.1|	790.8	0	PREDICTED: aspartate aminotransferase, mitochondrial-like [Anolis carolinensis]
Unigene30605_NK	271	287	49.767	gi|327268577|ref|XP_003219073.1|	61.6	1e-08	PREDICTED: hypothetical protein LOC100565234 [Anolis carolinensis]
Unigene15017_NK	1914	2024	49.6933	gi|327265290|ref|XP_003217441.1|	549.3	2e-154	PREDICTED: voltage-dependent anion-selective channel protein 1-like [Anolis carolinensis]
Unigene26763_NK	868	917	49.6453	--	--	--	--
Unigene6483_NK	1038	1096	49.6183	gi|327284637|ref|XP_003227043.1|	561.2	3e-158	PREDICTED: 60 kDa heat shock protein, mitochondrial-like [Anolis carolinensis]
Unigene26945_NK	862	910	49.6093	--	--	--	--
Unigene15603_NK	1351	1426	49.6013	gi|327282397|ref|XP_003225929.1|	609	1e-172	PREDICTED: tropomodulin-3-like [Anolis carolinensis]
CL3547.Contig2_NK	271	286	49.5936	gi|14285211|gb|AAK58879.1|AF355375_1	73.9	2e-12	putative reverse transcriptase [Takifugu rubripes]
Unigene31741_NK	309	326	49.5779	--	--	--	--
Unigene29602_NK	546	576	49.5745	--	--	--	--
Unigene6846_NK	239	252	49.5486	--	--	--	--
CL551.Contig1_NK	497	524	49.5455	gi|54781315|gb|AAV40808.1|	163.7	2e-39	immunoglobulin lambda light chain variable region VL6 [Homo sapiens]
Unigene6934_NK	775	817	49.5392	--	--	--	--
CL3800.Contig1_NK	443	467	49.5384	--	--	--	--
Unigene10504_NK	868	915	49.5371	gi|466068227|ref|XP_004281843.1|	315.5	2e-84	PREDICTED: histone deacetylase complex subunit SAP18 [Orcinus orca]
Unigene15317_NK	967	1019	49.5195	gi|327269992|ref|XP_003219776.1|	490.3	5e-137	PREDICTED: tyrosine-protein phosphatase non-receptor type 2-like [Anolis carolinensis]
Unigene6542_NK	392	413	49.51	gi|301610814|ref|XP_002934949.1|	122.9	4e-27	PREDICTED: mediator of RNA polymerase II transcription subunit 12-like [Xenopus (Silurana) tropicalis]
Unigene16617_NK	430	453	49.5061	--	--	--	--
Unigene26717_NK	2581	2717	49.4687	gi|327284942|ref|XP_003227194.1|	935.6	0	PREDICTED: transcription factor SOX-10-like [Anolis carolinensis]
Unigene14981_NK	2126	2238	49.4682	gi|327288925|ref|XP_003229175.1|	998	0	PREDICTED: t-complex protein 1 subunit eta-like [Anolis carolinensis]
Unigene20651_NK	2992	3146	49.4113	gi|388890240|ref|NP_001254482.1|	1380.9	0	junction plakoglobin [Gallus gallus] >gi|302120406|gb|ADK92413.1| plakoglobin [Gallus gallus]
Unigene30495_NK	350	368	49.4093	--	--	--	--
Unigene31308_NK	255	268	49.3882	--	--	--	--
Unigene25690_NK	1032	1084	49.3604	gi|327259178|ref|XP_003214415.1|	494.6	3e-138	PREDICTED: activator of 90 kDa heat shock protein ATPase homolog 1-like [Anolis carolinensis]
Unigene7896_NK	1293	1357	49.3185	--	--	--	--
CL3230.Contig1_NK	506	531	49.3143	--	--	--	--
Unigene23829_NK	3298	3460	49.3008	gi|465991736|gb|EMP38716.1|	948.3	0	Cordon-bleu protein-like 1 [Chelonia mydas]
Unigene29629_NK	1617	1696	49.2884	gi|465954211|gb|EMP25762.1|	289.3	4e-76	4F2 cell-surface antigen heavy chain [Chelonia mydas]
Unigene20604_NK	453	475	49.2747	gi|327275957|ref|XP_003222738.1|	142.9	4e-33	PREDICTED: hypothetical protein LOC100559599 [Anolis carolinensis]
Unigene31811_NK	455	477	49.2647	--	--	--	--
Unigene15574_NK	498	522	49.2572	--	--	--	--
Unigene20307_NK	353	370	49.2556	--	--	--	--
Unigene7042_NK	3611	3784	49.2439	gi|327281303|ref|XP_003225388.1|	1773.4	0	PREDICTED: alanyl-tRNA synthetase, cytoplasmic-like [Anolis carolinensis]
Unigene31697_NK	669	701	49.2403	gi|74006277|ref|XP_545765.2|	236.5	7e-61	PREDICTED: prefoldin subunit 2 [Canis lupus familiaris]
Unigene23196_NK	565	591	49.155	--	--	--	--
Unigene29503_NK	1478	1546	49.1546	gi|327273047|ref|XP_003221294.1|	362.5	3e-98	PREDICTED: probable E3 ubiquitin-protein ligase HERC6-like [Anolis carolinensis]
Unigene20343_NK	1924	2012	49.1419	gi|327260015|ref|XP_003214831.1|	639.4	0	PREDICTED: ribonuclease inhibitor-like [Anolis carolinensis]
Unigene23876_NK	3467	3625	49.1341	gi|327263251|ref|XP_003216434.1|	1365.5	0	PREDICTED: endoplasmic reticulum aminopeptidase 1-like [Anolis carolinensis]
CL2635.Contig1_NK	1007	1052	49.0925	gi|157285980|gb|ABV31711.1|	37	4e-49	transposase [Salmo salar]
CL741.Contig1_NK	563	588	49.0792	gi|187469754|gb|AAI66953.1|	282.3	8e-75	LOC100170417 protein [Xenopus (Silurana) tropicalis]
Unigene31749_NK	1452	1515	49.0315	gi|327280009|ref|XP_003224747.1|	731.9	0	PREDICTED: cAMP-dependent protein kinase type I-alpha regulatory subunit-like [Anolis carolinensis]
Unigene28194_NK	1121	1169	49.0047	gi|465955244|gb|EMP26344.1|	335.9	2e-90	Mitochondrial import inner membrane translocase subunit Tim17-B [Chelonia mydas]
Unigene25338_NK	1952	2034	48.9666	gi|118100151|ref|XP_415767.2|	595.5	3e-168	PREDICTED: transmembrane protein 120A [Gallus gallus]
Unigene31842_NK	555	578	48.94	--	--	--	--
Unigene30720_NK	561	584	48.9191	--	--	--	--
Unigene6485_NK	1000	1040	48.8722	--	--	--	--
Unigene22998_NK	2163	2249	48.8609	gi|224079668|ref|XP_002192741.1|	413.7	2e-113	PREDICTED: tumor protein p63-regulated gene 1-like protein [Taeniopygia guttata]
Unigene31619_NK	1048	1089	48.831	--	--	--	--
Unigene10828_NK	310	322	48.8116	--	--	--	--
Unigene27178_NK	596	619	48.806	gi|149446031|ref|XP_001516247.1|	89	1e-16	PREDICTED: spliceosome RNA helicase DDX39B-like, partial [Ornithorhynchus anatinus]
Unigene29885_NK	2643	2744	48.7883	gi|224092796|ref|XP_002192787.1|	630.2	1e-178	PREDICTED: BEN domain-containing protein 7 [Taeniopygia guttata]
Unigene29154_NK	446	463	48.7837	gi|466000802|gb|EMP41349.1|	135.6	7e-31	Immunoglobulin lambda-like polypeptide 5 [Chelonia mydas]
Unigene21054_NK	749	777	48.7493	gi|327274168|ref|XP_003221850.1|	57.8	6e-07	PREDICTED: annexin A5-like [Anolis carolinensis]
Unigene27146_NK	456	473	48.7445	--	--	--	--
Unigene27762_NK	1769	1834	48.7192	gi|327262795|ref|XP_003216209.1|	926	0	PREDICTED: endoplasmic reticulum lectin 1-like [Anolis carolinensis]
Unigene13723_NK	713	739	48.7061	--	--	--	--
Unigene31649_NK	1666	1726	48.6849	gi|465984132|gb|EMP36492.1|	602.4	2e-170	Transcription factor AP-1, partial [Chelonia mydas]
Unigene28683_NK	1144	1185	48.6767	gi|327288470|ref|XP_003228949.1|	164.5	9e-39	PREDICTED: mitoferrin-1-like [Anolis carolinensis]
Unigene6808_NK	644	667	48.6708	gi|118089939|ref|XP_001233417.1|	362.5	8e-99	PREDICTED: dynactin subunit 6 isoform 1 [Gallus gallus]
Unigene6503_NK	2576	2667	48.6526	gi|327266202|ref|XP_003217895.1|	1395.2	0	PREDICTED: glutaminyl-tRNA synthetase-like [Anolis carolinensis]
Unigene26004_NK	753	779	48.6151	--	--	--	--
Unigene28563_NK	2029	2099	48.6138	gi|465958139|gb|EMP27735.1|	911.4	0	Eukaryotic translation initiation factor 4 gamma 1 [Chelonia mydas]
Unigene25380_NK	4747	4910	48.6061	gi|301624101|ref|XP_002941349.1|	83.6	1e-13	PREDICTED: hypothetical protein LOC100486655 [Xenopus (Silurana) tropicalis]
CL1281.Contig2_NK	2476	2560	48.5868	gi|327283969|ref|XP_003226712.1|	1116.3	0	PREDICTED: transmembrane 9 superfamily member 1-like [Anolis carolinensis]
Unigene30701_NK	236	244	48.5855	gi|327261191|ref|XP_003215415.1|	84.3	1e-15	PREDICTED: ectonucleotide pyrophosphatase/phosphodiesterase family member 4-like [Anolis carolinensis]
CL3562.Contig3_NK	443	458	48.5837	gi|327271319|ref|XP_003220435.1|	106.7	3e-22	PREDICTED: UHRF1-binding protein 1-like [Anolis carolinensis]
Unigene20480_NK	1737	1794	48.5346	gi|471369228|ref|XP_004375133.1|	104	2e-20	PREDICTED: actin-related protein 3 isoform 2 [Trichechus manatus latirostris]
Unigene9790_NK	601	620	48.4782	gi|327260723|ref|XP_003215183.1|	304.7	1e-81	PREDICTED: bifunctional purine biosynthesis protein PURH-like [Anolis carolinensis]
Unigene31722_NK	728	751	48.4772	gi|212274308|ref|NP_001085717.2|	166.4	1e-39	selenoprotein M precursor [Xenopus laevis] >gi|190358766|sp|Q6GP98.2|SELM_XENLA RecName: Full=Selenoprotein M; Short=SelM; Flags: Precursor
Unigene26555_NK	476	491	48.4734	--	--	--	--
Unigene28496_NK	1767	1822	48.4552	gi|327263645|ref|XP_003216628.1|	493.4	1e-137	PREDICTED: NF-kappa-B inhibitor alpha-like [Anolis carolinensis]
Unigene25281_NK	359	370	48.4324	--	--	--	--
Unigene27111_NK	1708	1760	48.4232	gi|327270806|ref|XP_003220179.1|	700.7	0	PREDICTED: tyrosine-protein kinase JAK1-like [Anolis carolinensis]
Unigene10609_NK	448	461	48.3562	gi|10442710|gb|AAG17444.1|AF297035_1	146.4	3e-34	cytochrome C oxidase copper chaperone [Ophiophagus hannah]
Unigene31617_NK	1132	1164	48.3209	gi|327262119|ref|XP_003215873.1|	422.2	2e-116	PREDICTED: proteasome subunit beta type-1-like [Anolis carolinensis]
Unigene6813_NK	1148	1180	48.3024	gi|471402033|ref|XP_004383563.1|	124	1e-26	PREDICTED: alpha-adducin isoform 2 [Trichechus manatus latirostris]
CL3925.Contig3_NK	395	405	48.1822	gi|327280888|ref|XP_003225183.1|	145.2	8e-34	PREDICTED: ig lambda chain V-VI region SUT-like [Anolis carolinensis]
Unigene31797_NK	241	247	48.1625	--	--	--	--
Unigene15266_NK	1371	1405	48.1579	--	--	--	--
Unigene884_NK	246	252	48.1387	--	--	--	--
Unigene15021_NK	371	380	48.1325	--	--	--	--
Unigene20097_NK	209	214	48.1168	gi|449279099|gb|EMC86766.1|	28.5	2e-06	Putative uncharacterized transposon-derived protein ZK1236.4, partial [Columba livia]
CL3460.Contig1_NK	507	519	48.1048	--	--	--	--
Unigene27433_NK	217	222	48.0753	--	--	--	--
Unigene781_NK	1031	1053	47.9953	--	--	--	--
Unigene25629_NK	2053	2096	47.9768	gi|327286460|ref|XP_003227948.1|	780.4	0	PREDICTED: tissue-type plasminogen activator-like [Anolis carolinensis]
Unigene24558_NK	883	901	47.9505	gi|465999340|gb|EMP40899.1|	106.7	1e-21	Transcription elongation regulator 1 [Chelonia mydas]
Unigene13465_NK	497	507	47.9381	--	--	--	--
Unigene25088_NK	907	925	47.9251	gi|327274824|ref|XP_003222176.1|	640.2	0	PREDICTED: integrin beta-1-like [Anolis carolinensis]
Unigene20328_NK	209	213	47.8919	--	--	--	--
Unigene30673_NK	367	374	47.8889	--	--	--	--
Unigene25061_NK	264	269	47.8825	--	--	--	--
Unigene27480_NK	860	876	47.8668	--	--	--	--
Unigene26734_NK	2114	2153	47.8595	gi|327265917|ref|XP_003217754.1|	1114	0	PREDICTED: transketolase-like [Anolis carolinensis]
Unigene14397_NK	327	333	47.8548	--	--	--	--
Unigene28586_NK	347	353	47.8051	--	--	--	--
Unigene15147_NK	655	666	47.7817	gi|327290575|ref|XP_003229998.1|	230.3	5e-59	PREDICTED: NADH dehydrogenase [ubiquinone] 1 beta subcomplex subunit 10-like [Anolis carolinensis]
Unigene15544_NK	1211	1231	47.7686	gi|402906046|ref|XP_003915818.1|	289.3	2e-76	PREDICTED: AP-2 complex subunit sigma isoform 2 [Papio anubis]
CL5424.Contig20_NK	948	963	47.7361	gi|408816336|dbj|BAM62877.1|	56.2	5e-80	L1-encoded reverse transcriptase-like protein [Trimeresurus flavoviridis]
Unigene27368_NK	1275	1295	47.7297	gi|449280344|gb|EMC87671.1|	436.8	1e-120	Integral membrane protein 2B [Columba livia]
Unigene25592_NK	1051	1067	47.7079	--	--	--	--
Unigene28800_NK	1166	1183	47.6777	--	--	--	--
Unigene23309_NK	1112	1128	47.6687	gi|388454344|ref|NP_001253610.1|	399.4	1e-109	transmembrane emp24 domain-containing protein 4 precursor [Macaca mulatta] >gi|355560652|gb|EHH17338.1| Endoplasmic reticulum stress-response protein 25 [Macaca mulatta]
Unigene31700_NK	727	737	47.6389	--	--	--	--
Unigene29833_NK	1253	1269	47.5926	--	--	--	--
Unigene28635_NK	393	398	47.5904	--	--	--	--
CL971.Contig2_NK	397	402	47.5844	--	--	--	--
Unigene31642_NK	482	488	47.5775	--	--	--	--
Unigene22247_NK	1330	1346	47.5579	gi|126338110|ref|XP_001363805.1|	291.6	6e-77	PREDICTED: profilin-2-like isoform 1 [Monodelphis domestica]
Unigene31703_NK	416	421	47.5574	--	--	--	--
Unigene14479_NK	1581	1600	47.5573	gi|327266028|ref|XP_003217809.1|	656	0	PREDICTED: LOW QUALITY PROTEIN: cytochrome b-c1 complex subunit 1, mitochondrial-like [Anolis carolinensis]
Unigene28193_NK	671	679	47.5528	--	--	--	--
CL2121.Contig4_NK	1721	1741	47.5386	gi|327266482|ref|XP_003218034.1|	486.5	1e-135	PREDICTED: spliceosome RNA helicase BAT1-like [Anolis carolinensis]
Unigene31182_NK	356	360	47.5205	gi|149572260|ref|XP_001514967.1|	98.6	9e-20	PREDICTED: ragulator complex protein LAMTOR1-like, partial [Ornithorhynchus anatinus]
Unigene31628_NK	1715	1734	47.5132	gi|327264909|ref|XP_003217251.1|	525.4	3e-147	PREDICTED: WW domain-binding protein 2-like [Anolis carolinensis]
CL155.Contig4_NK	292	295	47.4753	gi|327266562|ref|XP_003218073.1|	72	9e-12	PREDICTED: tripartite motif-containing protein 7-like [Anolis carolinensis]
Unigene25135_NK	426	430	47.4338	--	--	--	--
Unigene31690_NK	508	512	47.3626	--	--	--	--
Unigene31814_NK	265	267	47.3472	--	--	--	--
CL4379.Contig2_NK	1369	1378	47.3015	gi|307746908|ref|NP_001182714.1|	92.8	4e-17	thymosin beta 15 [Gallus gallus] >gi|20140786|sp|Q9DET5.3|TB15A_COTJA RecName: Full=Thymosin beta-15A homolog; AltName: Full=Thymosin beta >gi|11342543|emb|CAC17010.1| thymosin beta [Coturnix japonica] >gi|112889609|gb|ABI26171.1| thymosin beta 15-like protein [Gallus gallus] >gi|223929922|gb|ACN24619.1| thymosin beta 15 [Gallus gallus] >gi|449269968|gb|EMC80703.1| Thymosin beta-15A like protein …
Unigene20878_NK	1712	1723	47.2945	gi|45384122|ref|NP_990446.1|	364.8	8e-99	LIM domain kinase 2 [Gallus gallus] >gi|1708823|sp|P53666.1|LIMK2_CHICK RecName: Full=LIM domain kinase 2; Short=LIMK-2 >gi|643086|dbj|BAA05372.1| LIMK [Gallus gallus]
Unigene6843_NK	803	808	47.2851	gi|327266490|ref|XP_003218038.1|	314.7	3e-84	PREDICTED: negative elongation factor E-like [Anolis carolinensis]
Unigene27692_NK	350	352	47.2611	--	--	--	--
Unigene15730_NK	533	536	47.257	gi|327285258|ref|XP_003227351.1|	172.9	6e-42	PREDICTED: NADH dehydrogenase [ubiquinone] 1 beta subcomplex subunit 4-like [Anolis carolinensis]
Unigene26820_NK	2557	2570	47.2315	gi|327276425|ref|XP_003222970.1|	1333.9	0	PREDICTED: 72 kDa type IV collagenase-like [Anolis carolinensis]
Unigene29515_NK	410	412	47.2218	gi|327272672|ref|XP_003221108.1|	172.9	4e-42	PREDICTED: LOW QUALITY PROTEIN: UHRF1-binding protein 1-like [Anolis carolinensis]
CL1622.Contig5_NK	824	828	47.2207	--	--	--	--
Unigene667_NK	4378	4397	47.1965	--	--	--	--
Unigene20784_NK	244	245	47.1851	gi|327268890|ref|XP_003219228.1|	54.7	1e-06	PREDICTED: target of Nesh-SH3-like [Anolis carolinensis]
CL1319.Contig3_NK	3343	3356	47.1753	gi|56377802|dbj|BAD74125.1|	1543.1	0	beta-catenin homologue [Pelodiscus sinensis] >gi|205318885|gb|ACI02435.1| beta-catenin [Anas platyrhynchos]
Unigene7954_NK	790	793	47.171	gi|470615646|ref|XP_004317095.1|	164.1	6e-39	PREDICTED: LOW QUALITY PROTEIN: heterogeneous nuclear ribonucleoprotein U-like [Tursiops truncatus]
CL462.Contig1_NK	1730	1736	47.1555	gi|71896495|ref|NP_001025509.1|	724.5	0	iroquois-class homeodomain protein IRX-1 [Gallus gallus] >gi|7688150|emb|CAB89806.1| iroquois homologue-1 [Gallus gallus]
Unigene20134_NK	2240	2247	47.1394	gi|327265268|ref|XP_003217430.1|	725.7	0	PREDICTED: heat shock 70 kDa protein 4-like [Anolis carolinensis]
Unigene15020_NK	990	992	47.0875	gi|466010200|ref|XP_004270071.1|	424.1	5e-117	PREDICTED: alpha-1,6-mannosyl-glycoprotein 2-beta-N-acetylglucosaminyltransferase [Orcinus orca]
Unigene22997_NK	675	676	47.0622	--	--	--	--
Unigene26324_NK	736	736	46.9925	gi|327275703|ref|XP_003222612.1|	397.9	2e-109	PREDICTED: protein CASC3-like [Anolis carolinensis]
Unigene28430_NK	403	403	46.9925	gi|449480015|ref|XP_004177065.1|	156	5e-37	PREDICTED: zinc finger ZZ-type and EF-hand domain-containing protein 1 [Taeniopygia guttata]
Unigene29123_NK	673	673	46.9925	--	--	--	--
Unigene29743_NK	200	200	46.9925	--	--	--	--
Unigene6526_NK	555	555	46.9925	gi|48762918|ref|NP_006189.2|	108.2	2e-22	Purkinje cell protein 4 [Homo sapiens] >gi|3915800|sp|P48539.3|PCP4_HUMAN RecName: Full=Purkinje cell protein 4; AltName: Full=Brain-specific antigen PCP-4; AltName: Full=Brain-specific polypeptide PEP-19 >gi|16303802|gb|AAL16810.1|AF416716_1 Purkinje cell protein 4 [Homo sapiens] >gi|1563859|gb|AAC00024.1| PCP4 [Homo sapiens] >gi|1568615|gb|AAB09033.1| PEP19 [Homo sapiens] >gi|3171150|gb|AAC2399…
Unigene21387_NK	1083	1082	46.9491	gi|327264043|ref|XP_003216826.1|	276.2	2e-72	PREDICTED: ras-related protein Rab-3D-like [Anolis carolinensis]
Unigene23652_NK	1031	1030	46.947	gi|395501989|ref|XP_003755369.1|	65.5	5e-09	PREDICTED: nucleolysin TIAR [Sarcophilus harrisii]
Unigene15698_NK	890	889	46.9397	gi|327263703|ref|XP_003216657.1|	495.4	1e-138	PREDICTED: regulator of differentiation 1-like [Anolis carolinensis]
Unigene6722_NK	844	843	46.9369	--	--	--	--
Unigene23397_NK	741	740	46.9291	gi|327281900|ref|XP_003225683.1|	298.9	1e-79	PREDICTED: rho GTPase-activating protein 18-like [Anolis carolinensis]
Unigene26891_NK	471	470	46.8928	gi|327264790|ref|XP_003217194.1|	284.6	9e-76	PREDICTED: bromodomain-containing protein 4-like [Anolis carolinensis]
Unigene10607_NK	928	926	46.8913	gi|327270920|ref|XP_003220236.1|	431	3e-119	PREDICTED: glutathione S-transferase Mu 1-like [Anolis carolinensis]
Unigene13760_NK	894	892	46.8874	--	--	--	--
CL2868.Contig1_NK	1296	1293	46.8838	gi|327260175|ref|XP_003214911.1|	340.5	1e-91	PREDICTED: ficolin-1-like [Anolis carolinensis]
Unigene25297_NK	2081	2075	46.857	gi|326914963|ref|XP_003203792.1|	1081.6	0	PREDICTED: chaperone activity of bc1 complex-like, mitochondrial-like [Meleagris gallopavo]
Unigene28886_NK	969	966	46.847	--	--	--	--
Unigene23593_NK	304	303	46.838	--	--	--	--
Unigene31720_NK	881	878	46.8325	gi|350536753|ref|NP_001232730.1|	468.8	1e-130	putative proteasome (prosome macropain) subunit alpha type 2 [Taeniopygia guttata] >gi|327274993|ref|XP_003222258.1| PREDICTED: proteasome subunit alpha type-2-like [Anolis carolinensis] >gi|197128517|gb|ACH45015.1| putative proteasome (prosome macropain) subunit alpha type 2 [Taeniopygia guttata] >gi|197128518|gb|ACH45016.1| putative proteasome (prosome macropain) subunit alpha type 2 [Taeniopyg…
Unigene25634_NK	1054	1049	46.7696	--	--	--	--
Unigene15284_NK	1451	1444	46.7658	--	--	--	--
Unigene29374_NK	341	339	46.7169	gi|465951146|gb|EMP24165.1|	174.9	1e-42	Membralin [Chelonia mydas]
Unigene31769_NK	291	289	46.6696	--	--	--	--
Unigene23371_NK	865	859	46.6666	gi|327285628|ref|XP_003227535.1|	505.8	1e-141	PREDICTED: zinc finger protein 609-like [Anolis carolinensis]
Unigene20489_NK	1577	1566	46.6648	gi|224095553|ref|XP_002200103.1|	234.6	1e-59	PREDICTED: myotrophin [Taeniopygia guttata]
Unigene31422_NK	258	256	46.6283	gi|465969668|gb|EMP32130.1|	37.4	6e-12	hypothetical protein UY3_10755 [Chelonia mydas]
Unigene30863_NK	707	701	46.5937	--	--	--	--
Unigene25611_NK	4305	4267	46.5777	gi|327268666|ref|XP_003219117.1|	2118.2	0	PREDICTED: e3 ubiquitin-protein ligase listerin-like isoform 1 [Anolis carolinensis]
Unigene22860_NK	1672	1657	46.571	gi|58332572|ref|NP_001011360.1|	345.9	3e-93	ephrin-A3 precursor [Xenopus (Silurana) tropicalis] >gi|56789556|gb|AAH88524.1| ephrin-A3 [Xenopus (Silurana) tropicalis]
Unigene6953_NK	217	215	46.5594	--	--	--	--
Unigene20516_NK	697	690	46.5206	--	--	--	--
Unigene23566_NK	989	979	46.5174	gi|395534740|ref|XP_003769397.1|	135.6	3e-30	PREDICTED: uncharacterized protein LOC100919168 [Sarcophilus harrisii]
Unigene15110_NK	971	961	46.5086	gi|327270678|ref|XP_003220116.1|	321.6	3e-86	PREDICTED: 5&apos;-3&apos; exoribonuclease 2-like [Anolis carolinensis]
Unigene22876_NK	676	669	46.5059	gi|327282542|ref|XP_003226001.1|	228.4	2e-58	PREDICTED: activated RNA polymerase II transcriptional coactivator p15-like isoform 1 [Anolis carolinensis] >gi|327282544|ref|XP_003226002.1| PREDICTED: activated RNA polymerase II transcriptional coactivator p15-like isoform 2 [Anolis carolinensis]
Unigene12574_NK	1045	1034	46.4979	--	--	--	--
Unigene27622_NK	717	709	46.4682	--	--	--	--
Unigene15747_NK	948	937	46.4473	gi|4826972|ref|NP_005096.1|	355.9	1e-96	RNA-binding protein 8A [Homo sapiens] >gi|162287296|ref|NP_001095877.1| RNA-binding protein 8A isoform a [Mus musculus] >gi|255653066|ref|NP_001157445.1| RNA-binding protein 8A [Equus caballus] >gi|402794801|ref|NP_001258067.1| RNA-binding protein 8A [Rattus norvegicus] >gi|10720244|sp|Q9Y5S9.1|RBM8A_HUMAN RecName: Full=RNA-binding protein 8A; AltName: Full=Binder of OVCA1-1; Short=BOV-1; AltName…
Unigene14325_NK	1561	1542	46.4206	gi|327278051|ref|XP_003223776.1|	511.9	3e-143	PREDICTED: UPF0549 protein C20orf43 homolog [Anolis carolinensis]
Unigene27638_NK	394	389	46.3962	--	--	--	--
Unigene14750_NK	1133	1118	46.3704	gi|327277730|ref|XP_003223616.1|	55.5	6e-06	PREDICTED: desmoplakin-like [Anolis carolinensis]
Unigene23747_NK	2088	2060	46.3624	gi|327269002|ref|XP_003219284.1|	644	0	PREDICTED: Golgin-45-like [Anolis carolinensis]
Unigene15406_NK	730	720	46.3488	--	--	--	--
Unigene8708_NK	628	618	46.2442	gi|327288322|ref|XP_003228877.1|	267.3	3e-70	PREDICTED: malate dehydrogenase, mitochondrial-like [Anolis carolinensis]
Unigene13533_NK	1544	1519	46.2316	gi|327276986|ref|XP_003223247.1|	75.9	6e-12	PREDICTED: ORM1-like protein 2-like [Anolis carolinensis]
Unigene25921_NK	1097	1079	46.2215	--	--	--	--
Unigene24244_NK	471	463	46.1944	--	--	--	--
Unigene30886_NK	1561	1534	46.1797	--	--	--	--
Unigene15086_NK	2198	2159	46.1587	gi|327290407|ref|XP_003229914.1|	766.1	0	PREDICTED: programmed cell death protein 4-like, partial [Anolis carolinensis]
CL5667.Contig1_NK	814	799	46.1266	--	--	--	--
Unigene26659_NK	1930	1894	46.116	gi|50513466|pdb|1S70|A	683.7	0	Chain A, Complex Between Protein Ser/thr Phosphatase-1 (delta) And The Myosin Phosphatase Targeting Subunit 1 (mypt1)
Unigene19169_NK	1651	1620	46.1102	gi|327284435|ref|XP_003226943.1|	1001.1	0	PREDICTED: splicing factor 3A subunit 3-like [Anolis carolinensis]
Unigene30567_NK	634	622	46.1031	gi|327273255|ref|XP_003221396.1|	351.3	1e-95	PREDICTED: coiled-coil domain-containing protein 149-like, partial [Anolis carolinensis]
Unigene21056_NK	1138	1116	46.0841	gi|465991209|gb|EMP38570.1|	134.8	8e-30	Annexin A5 [Chelonia mydas]
Unigene15293_NK	4096	4015	46.0632	gi|327260586|ref|XP_003215115.1|	1424.8	0	PREDICTED: receptor-type tyrosine-protein phosphatase-like N-like [Anolis carolinensis]
Unigene31040_NK	720	705	46.0135	--	--	--	--
Unigene30729_NK	574	562	46.0101	gi|465951905|gb|EMP24614.1|	255.8	8e-67	Interferon-induced protein with tetratricopeptide repeats 5 [Chelonia mydas]
Unigene6494_NK	1192	1167	46.007	gi|71897167|ref|NP_001026578.1|	464.5	4e-129	proteasome subunit alpha type-5 [Gallus gallus]
Unigene11725_NK	2838	2777	45.9825	gi|327277896|ref|XP_003223699.1|	1079.3	0	PREDICTED: asparaginyl-tRNA synthetase, cytoplasmic-like [Anolis carolinensis]
Unigene31675_NK	1194	1168	45.9692	gi|348550232|ref|XP_003460936.1|	330.5	1e-88	PREDICTED: LOW QUALITY PROTEIN: complement factor D-like [Cavia porcellus]
Unigene6520_NK	1166	1140	45.9447	gi|327290195|ref|XP_003229809.1|	468.8	2e-130	PREDICTED: carbonyl reductase [NADPH] 1-like [Anolis carolinensis]
CL48.Contig2_NK	2775	2709	45.8749	gi|327287436|ref|XP_003228435.1|	1103.6	0	PREDICTED: DDB1- and CUL4-associated factor 8-like [Anolis carolinensis]
CL4168.Contig2_NK	537	524	45.8549	--	--	--	--
Unigene30132_NK	245	239	45.8417	--	--	--	--
CL5424.Contig3_NK	2197	2143	45.8375	gi|327269725|ref|XP_003219643.1|	211.8	1e-52	PREDICTED: 25-hydroxycholesterol 7-alpha-hydroxylase-like [Anolis carolinensis]
CL2223.Contig3_NK	2490	2428	45.8224	gi|45384364|ref|NP_990335.1|	850.1	0	rab GDP dissociation inhibitor beta [Gallus gallus] >gi|3420726|gb|AAC31910.1| Rab-GDP dissociation inhibitor [Gallus gallus]
Unigene31699_NK	1537	1498	45.8001	--	--	--	--
Unigene24816_NK	471	459	45.7953	--	--	--	--
Unigene6536_NK	3092	3013	45.7919	gi|326931210|ref|XP_003211726.1|	892.5	0	PREDICTED: sarcoplasmic/endoplasmic reticulum calcium ATPase 3 [Meleagris gallopavo]
Unigene15411_NK	577	562	45.7709	gi|12963633|ref|NP_075801.1|	193	6e-48	NADH dehydrogenase [ubiquinone] 1 alpha subcomplex subunit 13 [Mus musculus] >gi|20139162|sp|Q9ERS2.3|NDUAD_MOUSE RecName: Full=NADH dehydrogenase [ubiquinone] 1 alpha subcomplex subunit 13; AltName: Full=Cell death regulatory protein GRIM-19; AltName: Full=Complex I-B16.6; Short=CI-B16.6; AltName: Full=Gene associated with retinoic and interferon-induced mortality 19 protein; Short=GRIM-19; Shor…
Unigene27515_NK	306	298	45.764	--	--	--	--
Unigene15287_NK	1594	1552	45.7543	gi|327267582|ref|XP_003218578.1|	517.7	7e-145	PREDICTED: inorganic pyrophosphatase-like [Anolis carolinensis]
Unigene20128_NK	2177	2117	45.6974	gi|363736487|ref|XP_422229.3|	650.6	0	PREDICTED: protein osteopotentia homolog [Gallus gallus]
Unigene24577_NK	1378	1340	45.6967	gi|327274268|ref|XP_003221900.1|	577.4	6e-163	PREDICTED: something about silencing protein 10-like [Anolis carolinensis]
Unigene27537_NK	2504	2433	45.6601	gi|465998299|gb|EMP40602.1|	223.8	3e-56	Eukaryotic translation initiation factor 4E-binding protein 2 [Chelonia mydas]
Unigene31724_NK	556	540	45.6402	--	--	--	--
Unigene31787_NK	551	535	45.628	--	--	--	--
Unigene787_NK	1831	1777	45.6066	gi|390469678|ref|XP_003734159.1|	57.4	3e-06	PREDICTED: uncharacterized protein LOC100895606 [Callithrix jacchus]
Unigene14870_NK	302	293	45.5921	gi|327272564|ref|XP_003221054.1|	171	1e-41	PREDICTED: NADH dehydrogenase [ubiquinone] 1 alpha subcomplex subunit 6-like [Anolis carolinensis]
Unigene31183_NK	498	483	45.5771	gi|327288809|ref|XP_003229117.1|	221.1	1e-56	PREDICTED: ragulator complex protein PDRO-like [Anolis carolinensis]
Unigene31756_NK	851	825	45.5568	--	--	--	--
Unigene31778_NK	780	756	45.5466	gi|327287466|ref|XP_003228450.1|	245.4	2e-63	PREDICTED: probable 39S ribosomal protein L24, mitochondrial-like [Anolis carolinensis]
Unigene30122_NK	535	518	45.4993	--	--	--	--
Unigene7816_NK	1221	1182	45.4915	gi|327285932|ref|XP_003227685.1|	510.4	7e-143	PREDICTED: aminoacyl tRNA synthase complex-interacting multifunctional protein 2-like [Anolis carolinensis]
Unigene26814_NK	1563	1513	45.4893	gi|327290789|ref|XP_003230104.1|	661.8	0	PREDICTED: cytochrome b-c1 complex subunit 2, mitochondrial-like [Anolis carolinensis]
Unigene31728_NK	1030	997	45.487	gi|57530610|ref|NP_001006342.1|	218	6e-55	uncharacterized protein LOC420161 precursor [Gallus gallus]
Unigene31301_NK	558	540	45.4766	--	--	--	--
CL5011.Contig4_NK	1487	1439	45.4756	--	--	--	--
Unigene31652_NK	2059	1992	45.4634	gi|119614889|gb|EAW94483.1|	194.1	2e-47	dynein, light chain, LC8-type 2, isoform CRA_a [Homo sapiens]
Unigene24306_NK	276	267	45.4602	gi|327276363|ref|XP_003222939.1|	139	6e-32	PREDICTED: ras-related protein Rab-4B-like [Anolis carolinensis]
Unigene23230_NK	476	460	45.413	--	--	--	--
CL4812.Contig9_NK	1398	1351	45.4127	--	--	--	--
Unigene30983_NK	355	343	45.4041	gi|327274220|ref|XP_003221876.1|	58.5	1e-07	PREDICTED: c-X-C motif chemokine 11-like [Anolis carolinensis]
Unigene14875_NK	1135	1096	45.3778	--	--	--	--
Unigene31758_NK	376	363	45.3678	gi|471406366|ref|XP_004384903.1|	151.4	1e-35	PREDICTED: small ubiquitin-related modifier 3 [Trichechus manatus latirostris]
CL87.Contig2_NK	779	752	45.3638	gi|432942106|ref|XP_004082962.1|	152.1	2e-35	PREDICTED: anoctamin-1-like [Oryzias latipes]
Unigene15599_NK	709	684	45.3355	gi|348520112|ref|XP_003447573.1|	156	1e-36	PREDICTED: NEDD8-like [Oreochromis niloticus]
Unigene20839_NK	2453	2366	45.3259	gi|327264243|ref|XP_003216924.1|	1058.5	0	PREDICTED: 5&apos;-nucleotidase domain-containing protein 2-like [Anolis carolinensis]
Unigene31687_NK	610	588	45.2977	gi|327288320|ref|XP_003228876.1|	191	3e-47	PREDICTED: prefoldin subunit 6-like [Anolis carolinensis]
Unigene31737_NK	491	473	45.2698	gi|354477761|ref|XP_003501087.1|	129	7e-29	PREDICTED: immediate early response 3-interacting protein 1-like [Cricetulus griseus]
CL5652.Contig2_NK	945	910	45.2521	gi|327288182|ref|XP_003228807.1|	95.9	3e-18	PREDICTED: 1,25-dihydroxyvitamin D(3) 24-hydroxylase, mitochondrial-like [Anolis carolinensis]
Unigene20769_NK	1034	995	45.2201	--	--	--	--
Unigene15299_NK	1885	1813	45.1976	gi|327283929|ref|XP_003226692.1|	1168.7	0	PREDICTED: eukaryotic translation initiation factor 3 subunit A-like [Anolis carolinensis]
Unigene6869_NK	332	319	45.1525	--	--	--	--
Unigene16511_NK	2156	2071	45.1399	gi|50750776|ref|XP_422138.1|	723	0	PREDICTED: UBX domain-containing protein 4 [Gallus gallus]
Unigene31626_NK	2368	2274	45.1271	gi|466036750|ref|XP_004275492.1|	115.9	1e-23	PREDICTED: Na(+)/H(+) exchange regulatory cofactor NHE-RF1 [Orcinus orca]
Unigene30677_NK	351	337	45.1182	gi|327285049|ref|XP_003227247.1|	193	3e-48	PREDICTED: wiskott-Aldrich syndrome protein family member 2-like [Anolis carolinensis]
Unigene30566_NK	771	740	45.1031	gi|355745378|gb|EHH50003.1|	58.9	2e-07	hypothetical protein EGM_00760, partial [Macaca fascicularis]
Unigene31406_NK	568	545	45.0897	--	--	--	--
Unigene31828_NK	560	537	45.0625	gi|188501739|gb|ACD54838.1|	174.5	2e-42	MHC class I antigen [Iguana iguana]
Unigene20531_NK	534	512	45.0565	--	--	--	--
Unigene31729_NK	677	649	45.049	gi|350537651|ref|NP_001232058.1|	246.5	7e-64	ragulator complex protein LAMTOR2 [Taeniopygia guttata] >gi|224493126|sp|B5FYY5.1|LTOR2_TAEGU RecName: Full=Ragulator complex protein LAMTOR2; AltName: Full=Late endosomal/lysosomal adaptor and MAPK and MTOR activator 2
Unigene28733_NK	773	741	45.0472	--	--	--	--
Unigene29995_NK	1142	1094	45.0174	gi|327277267|ref|XP_003223387.1|	500.7	5e-140	PREDICTED: sialic acid synthase-like [Anolis carolinensis]
CL524.Contig3_NK	3663	3507	44.9912	gi|327282189|ref|XP_003225826.1|	69.7	1e-09	PREDICTED: retrotransposable element Tf2 155 kDa protein type 1-like [Anolis carolinensis]
Unigene11162_NK	1406	1346	44.9872	gi|327284932|ref|XP_003227189.1|	506.1	1e-141	PREDICTED: proteasome subunit alpha type-3-like [Anolis carolinensis]
Unigene20994_NK	398	381	44.9853	gi|327285378|ref|XP_003227411.1|	179.9	3e-44	PREDICTED: stathmin-like [Anolis carolinensis]
CL4119.Contig1_NK	1725	1651	44.9766	gi|327278592|ref|XP_003224045.1|	572.8	2e-161	PREDICTED: hypothetical protein LOC100559143 [Anolis carolinensis]
CL1844.Contig2_NK	943	902	44.9494	gi|327283372|ref|XP_003226415.1|	490.7	4e-137	PREDICTED: ubiquitin-conjugating enzyme E2 R2-like [Anolis carolinensis]
Unigene26645_NK	1211	1158	44.9359	gi|327264063|ref|XP_003216836.1|	515.8	1e-144	PREDICTED: protein YIPF2-like [Anolis carolinensis]
Unigene21038_NK	1390	1329	44.9303	gi|327267015|ref|XP_003218298.1|	466.8	1e-129	PREDICTED: sodium/potassium-transporting ATPase subunit beta-3-like [Anolis carolinensis]
Unigene31743_NK	706	675	44.9291	gi|327276154|ref|XP_003222835.1|	210.3	6e-53	PREDICTED: coiled-coil-helix-coiled-coil-helix domain-containing protein 10, mitochondrial-like [Anolis carolinensis]
Unigene15498_NK	1082	1034	44.9078	gi|45382061|ref|NP_990782.1|	468.8	2e-130	triosephosphate isomerase [Gallus gallus] >gi|136056|sp|P00940.2|TPIS_CHICK RecName: Full=Triosephosphate isomerase; Short=TIM; AltName: Full=Triose-phosphate isomerase >gi|212772|gb|AAA49094.1| TIM [Gallus gallus] >gi|212774|gb|AAA49095.1| triosephosphate isomerase (EC 5.3.1.1) [Gallus gallus]
Unigene6495_NK	1249	1193	44.8856	gi|50806608|ref|XP_424463.1|	560.5	6e-158	PREDICTED: thioredoxin-like 1 [Gallus gallus]
Unigene24745_NK	801	765	44.8805	--	--	--	--
Unigene542_NK	332	317	44.8694	--	--	--	--
Unigene27810_NK	529	505	44.8605	gi|449282500|gb|EMC89333.1|	95.5	1e-18	Large neutral amino acids transporter small subunit 1, partial [Columba livia]
Unigene20728_NK	2782	2654	44.8304	--	--	--	--
Unigene20479_NK	1013	966	44.8122	gi|45383528|ref|NP_989638.1|	549.3	1e-154	actin-related protein 3 [Gallus gallus] >gi|82217061|sp|Q90WD0.1|ARP3_CHICK RecName: Full=Actin-related protein 3; AltName: Full=Actin-like protein 3 >gi|15077081|gb|AAK83060.1| actin related protein 3 [Gallus gallus]
Unigene27459_NK	1120	1068	44.8107	--	--	--	--
Unigene29156_NK	689	657	44.81	gi|327280896|ref|XP_003225187.1|	58.9	2e-07	PREDICTED: hypothetical protein LOC100560921 [Anolis carolinensis]
Unigene508_NK	430	410	44.8068	--	--	--	--
Unigene20679_NK	532	507	44.7842	gi|471220037|ref|XP_004025098.1|	54.7	2e-06	hypothetical protein IMG5_192190, partial [Ichthyophthirius multifiliis] >gi|340500797|gb|EGR27646.1| hypothetical protein IMG5_192190 [Ichthyophthirius multifiliis]
Unigene20718_NK	633	603	44.7654	--	--	--	--
Unigene25360_NK	422	402	44.7654	--	--	--	--
Unigene6712_NK	398	379	44.7492	--	--	--	--
Unigene6535_NK	962	916	44.7455	--	--	--	--
Unigene6595_NK	2143	2038	44.6901	--	--	--	--
Unigene28664_NK	934	888	44.6781	--	--	--	--
Unigene31744_NK	385	366	44.6734	--	--	--	--
Unigene10446_NK	2573	2444	44.6365	gi|327290409|ref|XP_003229915.1|	1247.3	0	PREDICTED: mannosyl-oligosaccharide glucosidase-like [Anolis carolinensis]
Unigene27517_NK	412	391	44.5973	--	--	--	--
CL1315.Contig3_NK	2078	1970	44.5502	gi|327271576|ref|XP_003220563.1|	651.4	0	PREDICTED: ETS-related transcription factor Elf-3-like [Anolis carolinensis]
CL1912.Contig2_NK	1810	1715	44.5261	gi|327260175|ref|XP_003214911.1|	202.2	7e-50	PREDICTED: ficolin-1-like [Anolis carolinensis]
Unigene30344_NK	493	467	44.5142	--	--	--	--
Unigene20125_NK	885	838	44.4969	gi|224047390|ref|XP_002198905.1|	510.4	4e-143	PREDICTED: protein transport protein Sec23A-like [Taeniopygia guttata]
Unigene30136_NK	375	355	44.4863	--	--	--	--
CL825.Contig1_NK	2221	2102	44.4747	gi|327259711|ref|XP_003214679.1|	612.5	3e-173	PREDICTED: GDP-fucose transporter 1-like [Anolis carolinensis]
Unigene31689_NK	1057	999	44.4139	gi|363739553|ref|XP_001233346.2|	531.6	2e-149	PREDICTED: trinucleotide repeat-containing gene 18 protein [Gallus gallus]
Unigene20847_NK	2088	1971	44.3593	gi|85861170|ref|NP_001034286.1|	510	2e-142	torsin-1B precursor [Rattus norvegicus] >gi|85056989|gb|AAI11705.1| Torsin family 1, member B [Rattus norvegicus] >gi|149039067|gb|EDL93287.1| rCG45853 [Rattus norvegicus]
Unigene6691_NK	249	235	44.3504	gi|327288352|ref|XP_003228892.1|	161.8	9e-39	PREDICTED: bromodomain-containing protein 3-like [Anolis carolinensis]
Unigene20921_NK	1603	1512	44.3248	gi|327282443|ref|XP_003225952.1|	344	1e-92	PREDICTED: LDLR chaperone MESD-like [Anolis carolinensis]
CL5242.Contig1_NK	1581	1491	44.3174	gi|449499424|ref|XP_004177321.1|	174.9	1e-41	PREDICTED: LOW QUALITY PROTEIN: cyclin-I [Taeniopygia guttata]
Unigene31260_NK	927	874	44.3058	gi|327261461|ref|XP_003215549.1|	480.7	4e-134	PREDICTED: stromal membrane-associated protein 1-like isoform 2 [Anolis carolinensis]
Unigene23675_NK	3775	3559	44.3037	gi|327282058|ref|XP_003225761.1|	1139.4	0	PREDICTED: signal recognition particle receptor subunit alpha-like [Anolis carolinensis]
Unigene27031_NK	225	212	44.2774	--	--	--	--
Unigene27565_NK	328	309	44.2704	--	--	--	--
Unigene23080_NK	671	632	44.2612	--	--	--	--
CL3457.Contig1_NK	361	340	44.2589	gi|432105586|gb|ELK31780.1|	89.7	4e-17	Claudin-7 [Myotis davidii]
CL2254.Contig1_NK	206	194	44.2551	--	--	--	--
Unigene701_NK	515	485	44.2551	gi|327282876|ref|XP_003226168.1|	240.3	2e-62	PREDICTED: proteasome inhibitor PI31 subunit-like [Anolis carolinensis]
Unigene23383_NK	324	305	44.2368	--	--	--	--
Unigene27698_NK	985	927	44.2255	gi|327260055|ref|XP_003214851.1|	620.9	2e-176	PREDICTED: phosphatidylinositol-4-phosphate 3-kinase C2 domain-containing subunit alpha-like [Anolis carolinensis]
Unigene14580_NK	1807	1699	44.1839	gi|363729534|ref|XP_003640663.1|	675.2	0	PREDICTED: sphingomyelin phosphodiesterase-like, partial [Gallus gallus]
CL1791.Contig3_NK	5520	5190	44.1832	gi|327285206|ref|XP_003227325.1|	3353.2	0	PREDICTED: clathrin heavy chain 1-like [Anolis carolinensis]
Unigene20306_NK	283	266	44.1697	--	--	--	--
Unigene20490_NK	1646	1547	44.1661	--	--	--	--
CL195.Contig1_NK	1439	1352	44.1514	gi|327284608|ref|XP_003227029.1|	209.1	4e-52	PREDICTED: zinc finger protein 420-like [Anolis carolinensis]
Unigene31759_NK	479	450	44.1475	gi|32425477|gb|AAH17370.2|	243.4	2e-63	RBX1 protein [Homo sapiens]
Unigene23095_NK	577	542	44.142	gi|327282586|ref|XP_003226023.1|	132.5	1e-29	PREDICTED: NADH dehydrogenase [ubiquinone] 1 subunit C2-like [Anolis carolinensis]
Unigene31644_NK	1312	1231	44.0913	gi|327272884|ref|XP_003221214.1|	434.9	4e-120	PREDICTED: ras-related protein Rab-21-like [Anolis carolinensis]
Unigene31598_NK	1379	1293	44.0619	gi|301777328|ref|XP_002924084.1|	253.1	2e-65	PREDICTED: histone H2A.V-like [Ailuropoda melanoleuca]
Unigene25620_NK	1795	1683	44.0604	gi|327271618|ref|XP_003220584.1|	596.7	1e-168	PREDICTED: RNA-binding protein 39-like [Anolis carolinensis]
Unigene26925_NK	400	375	44.0555	--	--	--	--
Unigene22898_NK	815	764	44.0519	gi|327260968|ref|XP_003215304.1|	353.6	6e-96	PREDICTED: catenin alpha-1-like [Anolis carolinensis]
Unigene31701_NK	398	373	44.0407	--	--	--	--
Unigene26323_NK	774	725	44.0176	gi|465974443|gb|EMP33844.1|	201.1	4e-50	Protein CASC3 [Chelonia mydas]
Unigene20722_NK	709	664	44.0099	gi|327278673|ref|XP_003224085.1|	169.1	1e-40	PREDICTED: cytochrome c oxidase subunit 7A-related protein, mitochondrial-like [Anolis carolinensis]
Unigene14591_NK	392	367	43.9956	gi|327268632|ref|XP_003219100.1|	118.2	1e-25	PREDICTED: uncharacterized protein C21orf59-like [Anolis carolinensis]
Unigene15475_NK	1817	1701	43.9925	gi|327265921|ref|XP_003217756.1|	177.9	1e-42	PREDICTED: selenoprotein K-like isoform 1 [Anolis carolinensis]
CL536.Contig1_NK	367	343	43.9195	gi|123779|sp|P19180.1|HV03_CARAU	133.7	2e-30	RecName: Full=Ig heavy chain V region 3; Flags: Precursor >gi|212990|gb|AAA50807.1| Ig heavy chain V-region (V3) precursor, partial [Carassius auratus]
CL3294.Contig1_NK	3728	3484	43.9168	gi|45383127|ref|NP_989854.1|	112.8	1e-22	talin-1 [Gallus gallus] >gi|81175199|sp|P54939.2|TLN1_CHICK RecName: Full=Talin-1 >gi|26000436|gb|AAN75275.1| talin [Gallus gallus]
Unigene642_NK	2166	2024	43.9118	gi|327275658|ref|XP_003222590.1|	1201.8	0	PREDICTED: kelch-like protein 11-like [Anolis carolinensis]
Unigene20444_NK	1619	1512	43.8868	gi|327261523|ref|XP_003215579.1|	362.8	2e-98	PREDICTED: akirin-2-like [Anolis carolinensis]
CL4192.Contig2_NK	2039	1904	43.8812	gi|189217700|ref|NP_001121291.1|	469.9	2e-130	solute carrier family 39 (zinc transporter), member 7 precursor [Xenopus laevis] >gi|115528301|gb|AAI24939.1| LOC100158375 protein [Xenopus laevis]
Unigene30365_NK	604	564	43.8804	gi|327288054|ref|XP_003228743.1|	282.3	9e-75	PREDICTED: cyclin-L1-like [Anolis carolinensis]
Unigene28697_NK	1144	1068	43.8707	gi|327286905|ref|XP_003228170.1|	221.9	5e-56	PREDICTED: cAMP-responsive element-binding protein-like 2-like [Anolis carolinensis]
Unigene24420_NK	715	667	43.8378	gi|327279317|ref|XP_003224403.1|	345.1	1e-93	PREDICTED: LOW QUALITY PROTEIN: arginyl aminopeptidase-like 1-like [Anolis carolinensis]
Unigene20996_NK	773	721	43.8313	gi|327285378|ref|XP_003227411.1|	119.4	1e-25	PREDICTED: stathmin-like [Anolis carolinensis]
Unigene26662_NK	1326	1236	43.803	gi|327277326|ref|XP_003223416.1|	712.6	0	PREDICTED: cysteine protease ATG4A-like [Anolis carolinensis]
Unigene14940_NK	289	269	43.7405	gi|395504206|ref|XP_003756447.1|	143.7	2e-33	PREDICTED: uncharacterized protein LOC100931706 [Sarcophilus harrisii]
CL4567.Contig1_NK	317	295	43.7312	--	--	--	--
Unigene6516_NK	934	869	43.7222	gi|327277370|ref|XP_003223438.1|	454.9	2e-126	PREDICTED: PCTP-like protein-like [Anolis carolinensis]
Unigene31224_NK	258	240	43.714	--	--	--	--
Unigene31816_NK	326	303	43.6771	gi|50806236|ref|XP_424384.1|	133.3	3e-30	PREDICTED: eukaryotic translation initiation factor 4E-binding protein 1 [Gallus gallus]
Unigene769_NK	296	275	43.6586	gi|55771211|dbj|BAD72127.1|	68.6	1e-10	reverse transcriptase [Anguilla japonica]
Unigene30722_NK	535	497	43.6547	gi|363740105|ref|XP_415308.3|	262.3	7e-69	PREDICTED: protein NipSnap homolog 1 [Gallus gallus]
Unigene7145_NK	491	456	43.6428	gi|88861958|gb|ABD52883.1|	162.5	6e-39	three finger toxin-like precursor [Lachesis muta]
Unigene14955_NK	840	780	43.6359	gi|441599546|ref|XP_003260014.2|	248.8	2e-64	PREDICTED: uncharacterized protein LOC100605176 [Nomascus leucogenys]
CL3505.Contig2_NK	1616	1500	43.6193	gi|224050510|ref|XP_002194926.1|	638.6	0	PREDICTED: fatty acid desaturase 1 [Taeniopygia guttata]
Unigene27950_NK	724	671	43.5525	--	--	--	--
Unigene25746_NK	259	240	43.5452	--	--	--	--
Unigene31709_NK	688	637	43.5091	gi|71896083|ref|NP_001026189.1|	297.7	3e-79	ubiquitin-conjugating enzyme E2 variant 2 [Gallus gallus] >gi|82194894|sp|Q5F3Z3.1|UB2V2_CHICK RecName: Full=Ubiquitin-conjugating enzyme E2 variant 2
Unigene15583_NK	1899	1758	43.5034	--	--	--	--
Unigene24930_NK	2123	1965	43.4952	--	--	--	--
Unigene6468_NK	738	683	43.4904	--	--	--	--
Unigene20042_NK	602	557	43.4798	gi|50732085|ref|XP_418471.1|	112.8	1e-23	PREDICTED: retinoic acid receptor responder protein 2 isoform 2 [Gallus gallus] >gi|363729707|ref|XP_003640690.1| PREDICTED: retinoic acid receptor responder protein 2 isoform 1 [Gallus gallus]
Unigene26758_NK	1979	1831	43.4782	--	--	--	--
Unigene27521_NK	1052	973	43.4636	gi|327287006|ref|XP_003228220.1|	559.3	1e-157	PREDICTED: cytosolic Fe-S cluster assembly factor nubp1-A-like [Anolis carolinensis]
Unigene31705_NK	1646	1522	43.4524	--	--	--	--
Unigene27695_NK	876	810	43.452	--	--	--	--
Unigene21989_NK	345	319	43.4511	gi|833621|emb|CAA41060.1|	154.8	1e-36	alpha tropomyosin of brain [Gallus gallus]
Unigene27488_NK	597	552	43.4504	gi|327279438|ref|XP_003224463.1|	262.3	1e-68	PREDICTED: UMP-CMP kinase-like [Anolis carolinensis]
CL5415.Contig1_NK	3434	3175	43.4483	--	--	--	--
Unigene26710_NK	1444	1335	43.4453	gi|327278743|ref|XP_003224120.1|	621.3	3e-176	PREDICTED: cytoplasmic dynein 1 heavy chain 1-like [Anolis carolinensis]
CL2398.Contig1_NK	1335	1234	43.4373	gi|399567823|ref|NP_001257807.1|	737.3	0	T-box transcription factor TBX3 [Gallus gallus]
Unigene28956_NK	723	668	43.4177	--	--	--	--
CL4763.Contig1_NK	1574	1454	43.4099	--	--	--	--
Unigene6856_NK	686	633	43.3619	--	--	--	--
Unigene14624_NK	309	285	43.3426	gi|410903478|ref|XP_003965220.1|	95.1	1e-18	PREDICTED: UPF0729 protein C18orf32 homolog [Takifugu rubripes]
Unigene796_NK	3102	2860	43.3265	gi|327289822|ref|XP_003229623.1|	1377.1	0	PREDICTED: mitogen-activated protein kinase 6-like [Anolis carolinensis]
Unigene9593_NK	678	625	43.3191	gi|50733613|ref|XP_418926.1|	197.6	4e-49	PREDICTED: uncharacterized protein LOC420835 [Gallus gallus]
Unigene31673_NK	1482	1365	43.2826	--	--	--	--
Unigene28254_NK	314	289	43.2511	gi|327260007|ref|XP_003214827.1|	207.2	1e-52	PREDICTED: epidermal growth factor receptor kinase substrate 8-like protein 2-like [Anolis carolinensis]
CL216.Contig2_NK	522	480	43.2115	--	--	--	--
Unigene20393_NK	333	306	43.1823	--	--	--	--
Unigene15644_NK	884	812	43.1651	--	--	--	--
Unigene931_NK	671	616	43.1407	--	--	--	--
Unigene31669_NK	1162	1066	43.1102	gi|327289281|ref|XP_003229353.1|	509.6	1e-142	PREDICTED: microtubule-associated protein RP/EB family member 1-like isoform 1 [Anolis carolinensis] >gi|327289283|ref|XP_003229354.1| PREDICTED: microtubule-associated protein RP/EB family member 1-like isoform 2 [Anolis carolinensis]
Unigene14692_NK	626	573	43.0139	--	--	--	--
Unigene6491_NK	1677	1534	42.9854	gi|149409092|ref|XP_001511775.1|	752.3	0	PREDICTED: actin-related protein 2/3 complex subunit 1A [Ornithorhynchus anatinus]
Unigene20152_NK	976	892	42.9481	--	--	--	--
CL5403.Contig2_NK	324	296	42.9315	--	--	--	--
CL4771.Contig1_NK	2398	2190	42.9165	gi|327289966|ref|XP_003229695.1|	941	0	PREDICTED: antigen peptide transporter 2-like [Anolis carolinensis]
Unigene23827_NK	2283	2083	42.8758	gi|449507069|ref|XP_002194326.2|	115.5	1e-23	PREDICTED: cordon-bleu protein-like 1 [Taeniopygia guttata]
Unigene13172_NK	1574	1436	42.8725	gi|327279908|ref|XP_003224697.1|	826.6	0	PREDICTED: glutathione reductase, mitochondrial-like [Anolis carolinensis]
Unigene31382_NK	1284	1171	42.8569	--	--	--	--
Unigene15724_NK	2113	1927	42.8559	gi|327276413|ref|XP_003222964.1|	822.8	0	PREDICTED: dnaJ homolog subfamily A member 2-like [Anolis carolinensis]
Unigene26275_NK	1370	1249	42.8421	gi|327267141|ref|XP_003218361.1|	625.9	1e-177	PREDICTED: protein phosphatase 1 regulatory subunit 7-like [Anolis carolinensis]
Unigene29127_NK	270	246	42.8154	--	--	--	--
CL2927.Contig1_NK	393	358	42.8075	gi|283464201|gb|ADB22684.1|	166.8	2e-40	lambda immunoglobulin light chain [Anolis carolinensis]
Unigene15290_NK	1626	1481	42.8019	gi|431914233|gb|ELK15491.1|	106.7	3e-21	T-box transcription factor TBX3 [Pteropus alecto]
Unigene20300_NK	1378	1255	42.798	gi|327282788|ref|XP_003226124.1|	665.6	0	PREDICTED: cyclin-Y-like protein 1-B-like [Anolis carolinensis]
Unigene6467_NK	2673	2434	42.7908	gi|327277736|ref|XP_003223619.1|	632.5	3e-179	PREDICTED: thioredoxin domain-containing protein 5-like [Anolis carolinensis]
Unigene25402_NK	1498	1364	42.7889	gi|157823617|ref|NP_001099918.1|	672.2	0	ubiquitin-conjugating enzyme E2 Q1 [Rattus norvegicus] >gi|170172548|ref|NP_081591.3| ubiquitin-conjugating enzyme E2 Q1 [Mus musculus] >gi|88909661|sp|Q7TSS2.2|UB2Q1_MOUSE RecName: Full=Ubiquitin-conjugating enzyme E2 Q1; AltName: Full=Ubiquitin carrier protein Q1; AltName: Full=Ubiquitin-protein ligase Q1 >gi|62955842|gb|AAY23286.1| galactosyl transferase-associated protein [Mus musculus] >gi|1…
Unigene6528_NK	1023	931	42.7664	gi|327281271|ref|XP_003225372.1|	535.8	1e-150	PREDICTED: coatomer subunit beta-like [Anolis carolinensis]
CL3656.Contig1_NK	854	777	42.7555	gi|148228778|ref|NP_001081217.1|	362.8	1e-98	proteasome subunit Y [Xenopus laevis] >gi|76779604|gb|AAI06526.1| LOC397716 protein [Xenopus laevis]
Unigene23384_NK	1263	1149	42.7509	gi|224045628|ref|XP_002186860.1|	115.5	5e-24	PREDICTED: UPF0766 protein C6orf228 homolog [Taeniopygia guttata]
CL5034.Contig2_NK	221	201	42.7398	gi|4378025|gb|AAD19348.1|	59.3	6e-08	reverse transcriptase-like protein [Takifugu rubripes]
Unigene6511_NK	1025	932	42.7288	gi|327287504|ref|XP_003228469.1|	340.5	8e-92	PREDICTED: 60S ribosome subunit biogenesis protein NIP7 homolog [Anolis carolinensis]
Unigene7982_NK	296	269	42.7061	--	--	--	--
CL2337.Contig1_NK	274	249	42.7049	gi|408816336|dbj|BAM62877.1|	36.2	3e-13	L1-encoded reverse transcriptase-like protein [Trimeresurus flavoviridis]
CL270.Contig1_NK	3362	3053	42.6735	gi|327291063|ref|XP_003230241.1|	1174.8	0	PREDICTED: neoverrucotoxin subunit beta-like [Anolis carolinensis]
Unigene28911_NK	943	856	42.6571	gi|291403629|ref|XP_002718145.1|	320.9	5e-86	PREDICTED: charged multivesicular body protein 4C-like [Oryctolagus cuniculus]
Unigene15298_NK	377	342	42.6298	gi|465968319|gb|EMP31690.1|	241.9	7e-63	Eukaryotic translation initiation factor 3 subunit A [Chelonia mydas]
Unigene20658_NK	482	437	42.6053	gi|327277552|ref|XP_003223528.1|	271.9	7e-72	PREDICTED: clathrin interactor 1-like [Anolis carolinensis]
Unigene26288_NK	1177	1067	42.6007	--	--	--	--
Unigene30877_NK	1696	1535	42.5316	gi|4239700|emb|CAA10770.1|	95.9	7e-18	reverse transcriptase-like [Bos taurus]
Unigene24859_NK	400	362	42.5282	gi|395508137|ref|XP_003758370.1|	27.7	4e-23	PREDICTED: uncharacterized protein LOC100927385 [Sarcophilus harrisii]
Unigene27783_NK	1373	1242	42.5089	--	--	--	--
Unigene31848_NK	260	235	42.474	--	--	--	--
Unigene251_NK	476	430	42.4512	gi|117306547|gb|AAI26683.1|	65.9	7e-10	Catenin (cadherin-associated protein), alpha 3 [Bos taurus]
Unigene25359_NK	266	240	42.3993	--	--	--	--
Unigene24506_NK	2414	2178	42.3984	gi|50759205|ref|XP_417566.1|	475.3	6e-132	PREDICTED: uncharacterized protein LOC419404 [Gallus gallus]
Unigene30216_NK	1339	1208	42.3951	--	--	--	--
Unigene31249_NK	204	184	42.3854	--	--	--	--
Unigene14055_NK	541	487	42.302	gi|327277354|ref|XP_003223430.1|	216.1	6e-55	PREDICTED: SLAIN motif-containing protein-like [Anolis carolinensis]
Unigene28397_NK	686	617	42.2659	gi|327271319|ref|XP_003220435.1|	79.7	1e-13	PREDICTED: UHRF1-binding protein 1-like [Anolis carolinensis]
Unigene6482_NK	2277	2047	42.2458	gi|327267326|ref|XP_003218453.1|	759.6	0	PREDICTED: aspartate aminotransferase, cytoplasmic-like [Anolis carolinensis]
CL5464.Contig3_NK	355	319	42.2271	--	--	--	--
CL3527.Contig1_NK	995	893	42.1752	gi|363733243|ref|XP_003641222.1|	162.9	2e-38	PREDICTED: placenta-specific gene 8 protein-like [Gallus gallus]
Unigene28605_NK	1904	1708	42.1551	gi|327259995|ref|XP_003214821.1|	443.7	1e-122	PREDICTED: CD151 antigen-like [Anolis carolinensis]
Unigene15216_NK	2844	2551	42.1512	gi|61098300|ref|NP_001012815.1|	773.9	0	26S proteasome non-ATPase regulatory subunit 5 [Gallus gallus]
Unigene24923_NK	1116	1001	42.1501	gi|327282570|ref|XP_003226015.1|	408.3	3e-112	PREDICTED: methylosome subunit pICln-like [Anolis carolinensis]
Unigene29230_NK	356	319	42.1085	--	--	--	--
Unigene27464_NK	1241	1112	42.1077	gi|57524826|ref|NP_001005830.1|	756.9	0	dual specificity mitogen-activated protein kinase kinase 1 [Gallus gallus]
Unigene20339_NK	808	724	42.1072	--	--	--	--
Unigene28787_NK	931	834	42.0964	gi|471400210|ref|XP_004382991.1|	150.6	1e-34	PREDICTED: arginine and glutamate-rich protein 1 [Trichechus manatus latirostris]
Unigene31739_NK	662	593	42.0945	gi|449268319|gb|EMC79189.1|	365.9	8e-100	Transmembrane and coiled-coil domains protein 1 [Columba livia]
Unigene28965_NK	825	739	42.0939	--	--	--	--
Unigene24067_NK	220	197	42.0797	gi|327266566|ref|XP_003218075.1|	63.9	2e-09	PREDICTED: zinc finger protein RFP-like [Anolis carolinensis]
Unigene29941_NK	220	197	42.0797	gi|325563745|gb|ADZ31387.1|	90.9	2e-17	MHC class I antigen [Gallus gallus]
Unigene18237_NK	210	188	42.0695	--	--	--	--
Unigene29923_NK	210	188	42.0695	--	--	--	--
CL5117.Contig1_NK	4405	3942	42.0533	gi|327285079|ref|XP_003227262.1|	1093.6	0	PREDICTED: moesin-like [Anolis carolinensis]
[truncated: 71,453 more rows]

## Sheet: Mas_FPKM>10
Malaysian Naja kaouthia Venom Gland Transcriptome Transcripts > 10 FPKM (Updated 1/6/2016)
geneID	geneLength	NK_rawfragments(21279975)	NK_FPKM	Nr-ID	Nr-Score	Nr-Evalue	Nr-annotation
Unigene29221_NK	837	1956696	109857	gi|2500802|sp|Q98961.1|CX5_NAJAT	164.1	7e-39	RecName: Full=Cytotoxin 5; AltName: Full=Cardiotoxin-5; Flags: Precursor >gi|1661036|gb|AAB18385.1| cardiotoxin 5 [Naja atra]
CL3063.Contig2_NK	367	518955	66449.6	gi|58176997|pdb|1V6P|A	145.6	6e-34	Chain A, Crystal Structure Of Cobrotoxin >gi|58176998|pdb|1V6P|B Chain B, Crystal Structure Of Cobrotoxin >gi|157830661|pdb|1COD|A Chain A, Solution Conformation Of Cobrotoxin: A Nuclear Magnetic Resonance And Hybrid Distance Geometry-Dynamical Simulated Annealing Study >gi|157830662|pdb|1COE|A Chain A, Solution Conformation Of Cobrotoxin: A Nuclear Magnetic Resonance And Hybrid Distance Geometry…
CL3063.Contig1_NK	364	452516	58420	gi|28380029|sp|P59276.1|CBTC_NAJKA	145.2	9e-34	RecName: Full=Cobrotoxin-c; Short=CBT-c; AltName: Full=Short neurotoxin 2; Short=NT2 >gi|14719477|pdb|1JE9|A Chain A, Nmr Solution Structure Of Nt2
Unigene29220_NK	375	400973	50247.3	gi|123910516|sp|Q2VBP1.1|NXS11_OPHHA	91.7	1e-17	RecName: Full=Short neurotoxin SNTX11; Flags: Precursor >gi|82570087|gb|ABB83628.1| short chain neurotoxin precursor [Ophiophagus hannah]
Unigene29218_NK	851	658499	36362.6	gi|311033516|sp|P82935.2|TXWW_NAJKA	192.6	2e-47	RecName: Full=Weak tryptophan-containing neurotoxin; Short=WTX; Flags: Precursor
CL239.Contig2_NK	716	149764	9829.32	gi|194739365|gb|ACF94325.1|	442.2	1e-122	cytochrome c oxidase subunit I [Naja atra]
Unigene31181_NK	705	143565	9569.48	gi|164420841|ref|YP_001648790.1|	192.6	1e-47	cytochrome c oxidase subunit II [Naja naja] >gi|209886915|ref|YP_002290769.1| cytochrome c oxidase subunit II [Naja atra] >gi|84371453|gb|ABC55907.1| cytochrome oxidase subunit 2 [Naja naja] >gi|194395405|gb|ACF60244.1| cytochrome c oxidase subunit II [Naja atra]
Unigene29219_NK	504	102548	9561.49	gi|46396562|sp|Q9YGJ5.1|NXSA2_NAJSP	63.9	3e-09	RecName: Full=Alpha-neurotoxin NTX-2; Flags: Precursor >gi|3860085|gb|AAD08813.1| post synaptic alpha neurotoxin precursor [Naja sputatrix]
CL2753.Contig1_NK	218	33981	7325.02	gi|2500805|sp|Q91996.1|CX7P_NAJAT	150.2	2e-35	RecName: Full=Cardiotoxin 7&apos;&apos;; Flags: Precursor >gi|1326089|gb|AAB01540.1| cardiotoxin VII [Naja atra] >gi|1399220|gb|AAB03219.1| cardiotoxin 7&apos;&apos; [Naja atra] >gi|1661040|gb|AAB18387.1| cardiotoxin 7&apos; [Naja atra] >gi|1688223|gb|AAB36928.1| cardiotoxin 7&apos;&apos; [Naja atra]
CL5128.Contig2_NK	1725	265455	7231.54	gi|24638468|sp|P00596.2|PA2A1_NAJKA	327.4	1e-87	RecName: Full=Acidic phospholipase A2 1; Short=svPLA2; AltName: Full=CM-II; AltName: Full=NnkPLA-I; AltName: Full=Phosphatidylcholine 2-acylhydrolase; Flags: Precursor >gi|4115521|dbj|BAA36403.1| phospholipase A2 [Naja kaouthia]
CL3707.Contig2_NK	446	65984	6952.37	gi|164420839|ref|YP_001648788.1|	221.5	9e-57	NADH dehydrogenase subunit 2 [Naja naja] >gi|83031520|gb|ABB96919.1| NADH dehydrogenase subunit 2 [Naja atra] >gi|84371451|gb|ABC55905.1| NADH dehydrogenase subunit 2 [Naja naja]
Unigene31433_NK	257	33562	6136.82	gi|128930|sp|P01391.1|NXL1_NAJKA	165.6	6e-40	RecName: Full=Alpha-elapitoxin-Nk2a; Short=Alpha-EPTX-Nk2a; AltName: Full=Alpha-cobratoxin; Short=Alpha-CbT; Short=Cbtx; AltName: Full=Long neurotoxin 1; AltName: Full=Neurotoxin 3 >gi|27065484|pdb|1LXG|A Chain A, Solution Structure Of Alpha-Cobratoxin Complexed With A Cognate Peptide (Structure Ensemble) >gi|27065486|pdb|1LXH|A Chain A, Solution Structure Of Alpha-Cobratoxin Complexed With A Cog…
CL2966.Contig2_NK	1697	218542	6051.76	gi|339906295|ref|YP_004733096.1|	406.8	1e-111	cytochrome c oxidase subunit I [Nerodia sipedon] >gi|335892892|gb|AEH59652.1| cytochrome c oxidase subunit I [Nerodia sipedon]
Unigene31180_NK	1104	138094	5878.07	gi|164420843|ref|YP_001648792.1|	303.5	1e-80	ATP synthase F0 subunit 6 [Naja naja] >gi|209886917|ref|YP_002290771.1| ATP synthase F0 subunit 6 [Naja atra] >gi|84371455|gb|ABC55909.1| ATPase subunit 6 [Naja naja] >gi|194395407|gb|ACF60246.1| ATP synthase F0 subunit 6 [Naja atra] >gi|194739367|gb|ACF94327.1| ATP synthase F0 subunit 6 [Naja atra]
Unigene29811_NK	312	38600	5813.82	gi|197726031|gb|ACH73168.1|	202.2	6e-51	kaouthin-2 precursor [Naja kaouthia]
CL2221.Contig1_NK	228	25905	5339.22	gi|470594802|ref|XP_004310480.1|	107.8	1e-22	PREDICTED: polyubiquitin-C, partial [Tursiops truncatus]
Unigene31432_NK	574	64035	5242.45	gi|45383816|ref|NP_989479.1|	142.9	8e-33	protein S100-A6 [Gallus gallus] >gi|3024592|sp|Q98953.1|S10A6_CHICK RecName: Full=Protein S100-A6; AltName: Full=Calcyclin; AltName: Full=S100 calcium-binding protein A6 >gi|1667484|gb|AAB18788.1| calcyclin [Gallus gallus]
CL532.Contig1_NK	2409	266603	5200.64	gi|209886918|ref|YP_002290772.1|	471.9	7e-131	cytochrome c oxidase subunit III [Naja atra] >gi|194395408|gb|ACF60247.1| cytochrome c oxidase subunit III [Naja atra]
CL3065.Contig1_NK	2646	285122	5063.72	gi|63146076|gb|AAY33972.1|	1005	0	PDI [Oxyuranus scutellatus scutellatus]
CL5055.Contig1_NK	1007	96279	4492.94	gi|18378015|gb|AAL66856.1|	473.8	6e-132	NADH dehydrogenase subunit 1 [Naja kaouthia]
CL1038.Contig1_NK	886	79047	4192.57	gi|11275218|pir||A59218	510	6e-143	nerve growth factor beta chain precursor - monocled cobra
CL4674.Contig2_NK	255	20861	3844.36	gi|14194609|sp|Q9MLJ3.1|CYB_NAJKA	151.4	1e-35	RecName: Full=Cytochrome b; AltName: Full=Complex III subunit 3; AltName: Full=Complex III subunit III; AltName: Full=Cytochrome b-c1 complex subunit 3; AltName: Full=Ubiquinol-cytochrome-c reductase complex cytochrome b subunit >gi|7141217|gb|AAF37254.1| cytochrome b [Naja kaouthia]
Unigene31177_NK	538	43368	3788.05	gi|343407494|gb|AEM23753.1|	309.3	5e-83	NADH dehydrogenase subunit 4, partial (mitochondrion) [Naja kaouthia]
CL4112.Contig2_NK	755	60360	3756.91	gi|327285618|ref|XP_003227530.1|	136.7	1e-30	PREDICTED: beta-2-microglobulin-like isoform 1 [Anolis carolinensis] >gi|327285620|ref|XP_003227531.1| PREDICTED: beta-2-microglobulin-like isoform 2 [Anolis carolinensis]
CL2446.Contig3_NK	503	38858	3630.29	gi|71041970|pdb|1XX5|A	366.7	2e-100	Chain A, Crystal Structure Of Natrin From Naja Atra Snake Venom >gi|71041971|pdb|1XX5|B Chain B, Crystal Structure Of Natrin From Naja Atra Snake Venom >gi|71041972|pdb|1XX5|C Chain C, Crystal Structure Of Natrin From Naja Atra Snake Venom >gi|119389589|pdb|2GIZ|A Chain A, Structural And Functional Analysis Of Natrin, A Member Of Crisp-3 Family Blocks A Variety Of Ion Channels >gi|119389590|pdb|2…
Unigene13697_NK	1543	108077	3291.52	gi|471367241|ref|XP_004374150.1|	440.3	1e-121	PREDICTED: actin, cytoplasmic 2 [Trichechus manatus latirostris]
CL3321.Contig2_NK	1966	135952	3249.61	gi|14194609|sp|Q9MLJ3.1|CYB_NAJKA	435.6	4e-120	RecName: Full=Cytochrome b; AltName: Full=Complex III subunit 3; AltName: Full=Complex III subunit III; AltName: Full=Cytochrome b-c1 complex subunit 3; AltName: Full=Ubiquinol-cytochrome-c reductase complex cytochrome b subunit >gi|7141217|gb|AAF37254.1| cytochrome b [Naja kaouthia]
CL3374.Contig1_NK	1158	73692	2990.48	gi|406829591|gb|AFS63888.1|	448.4	3e-124	GPX3 [Thamnophis elegans]
Unigene6564_NK	337	21229	2960.25	gi|431918153|gb|ELK17381.1|	195.3	7e-49	60S ribosomal protein L26-like 1 [Pteropus alecto]
Unigene22312_NK	1330	83066	2934.95	gi|345543|pir||JC1348	80.1	2e-13	hypothetical 18K protein - goldfish mitochondrion
CL706.Contig1_NK	584	35855	2885.13	gi|444727734|gb|ELW68212.1|	339.3	6e-92	Actin, cytoplasmic 2 [Tupaia chinensis]
Unigene31408_NK	228	13851	2854.8	gi|54035743|sp|Q91132.1|CO3_NAJKA	156.4	3e-37	RecName: Full=Cobra venom factor; Short=CVF; Short=CVFk; AltName: Full=Complement C3 homolog; Contains: RecName: Full=Cobra venom factor alpha chain; Contains: RecName: Full=Cobra venom factor gamma chain; Contains: RecName: Full=Cobra venom factor beta chain; Flags: Precursor >gi|2118405|pir||I51018 cobra venom factor precursor - monocled cobra >gi|319443754|pdb|3PRX|B Chain B, Structure Of Comp…
Unigene6569_NK	417	25316	2852.91	gi|46397021|sp|Q9DEQ3.1|TXL1_NAJAT	176	4e-43	RecName: Full=Neurotoxin homolog NL1; Flags: Precursor
CL5219.Contig1_NK	201	12185	2848.78	gi|12230755|sp|P82463.1|TXML2_NAJKA	140.2	2e-32	RecName: Full=Muscarinic toxin-like protein 2; Short=MTLP-2
Unigene22311_NK	252	14900	2778.53	gi|194739363|gb|ACF94323.1|	92.4	7e-18	NADH dehydrogenase subunit 1 [Naja atra]
CL5228.Contig1_NK	1644	94041	2688.09	--	--	--	--
CL3055.Contig1_NK	520	29584	2673.51	gi|197726031|gb|ACH73168.1|	239.6	4e-62	kaouthin-2 precursor [Naja kaouthia]
Unigene31178_NK	1118	62580	2630.41	gi|194739374|gb|ACF94334.1|	324.3	7e-87	NADH dehydrogenase subunit 6 [Naja atra]
CL3495.Contig1_NK	890	46665	2463.94	gi|125050|sp|P20229.1|IVBIT_NAJNA	125.6	3e-27	RecName: Full=Protease inhibitor; AltName: Full=Venom trypsin inhibitor
Unigene31407_NK	3400	178076	2461.25	gi|54035743|sp|Q91132.1|CO3_NAJKA	2233.8	0	RecName: Full=Cobra venom factor; Short=CVF; Short=CVFk; AltName: Full=Complement C3 homolog; Contains: RecName: Full=Cobra venom factor alpha chain; Contains: RecName: Full=Cobra venom factor gamma chain; Contains: RecName: Full=Cobra venom factor beta chain; Flags: Precursor >gi|2118405|pir||I51018 cobra venom factor precursor - monocled cobra >gi|319443754|pdb|3PRX|B Chain B, Structure Of Comp…
CL2051.Contig1_NK	1368	69593	2390.61	gi|391359383|sp|D3TTC2.1|VM3H_NAJAT	763.1	0	RecName: Full=Zinc metalloproteinase-disintegrin atragin; AltName: Full=Snake venom metalloproteinase; Short=SVMP; Flags: Precursor >gi|224482347|gb|ACN50006.1| atragin precursor [Naja atra]
Unigene6570_NK	847	42710	2369.6	gi|327278436|ref|XP_003223968.1|	203	1e-50	PREDICTED: lymphocyte antigen 6E-like [Anolis carolinensis]
CL2345.Contig1_NK	297	14195	2245.99	gi|449274204|gb|EMC83487.1|	134	2e-30	Elongation factor 1-alpha 2, partial [Columba livia]
CL2446.Contig2_NK	655	29349	2105.62	gi|48428841|sp|Q7ZZN8.1|CRVP2_NAJAT	358.6	1e-97	RecName: Full=Natrin-2; AltName: Full=Cysteine-rich venom protein 2; AltName: Full=NA-CRVP2; AltName: Full=Protein G2b; Flags: Precursor >gi|30172003|gb|AAP20603.1| cysteine-rich venom protein [Naja atra]
CL2461.Contig1_NK	245	10974	2104.88	--	--	--	--
Unigene23031_NK	273	12168	2094.52	gi|465955599|gb|EMP26515.1|	110.9	1e-23	Polyubiquitin-C, partial [Chelonia mydas]
Unigene31072_NK	590	26082	2077.39	gi|317412168|sp|D9IX97.1|VNP_NAJAT	74.3	3e-12	RecName: Full=Natriuretic peptide Na-NP; Flags: Precursor >gi|300430031|gb|ADK12001.1| natriuretic peptide [Naja atra]
CL2446.Contig1_NK	213	9392	2072.08	gi|48428837|sp|Q7T1K6.1|CRVP1_NAJAT	62	1e-08	RecName: Full=Natrin-1; AltName: Full=Cysteine-rich venom protein 1; AltName: Full=NA-CRVP1; AltName: Full=Protein G2a; Flags: Precursor >gi|32492059|gb|AAP85301.1| natrin [Naja atra]
Unigene14558_NK	561	23836	1996.64	gi|470620201|ref|XP_004318392.1|	281.6	1e-74	PREDICTED: 60S ribosomal protein L23 [Tursiops truncatus]
Unigene31437_NK	543	22922	1983.73	gi|348507607|ref|XP_003441347.1|	57.4	3e-07	PREDICTED: hypothetical protein LOC100699101 [Oreochromis niloticus]
Unigene31409_NK	1310	54315	1948.4	gi|54035743|sp|Q91132.1|CO3_NAJKA	816.6	0	RecName: Full=Cobra venom factor; Short=CVF; Short=CVFk; AltName: Full=Complement C3 homolog; Contains: RecName: Full=Cobra venom factor alpha chain; Contains: RecName: Full=Cobra venom factor gamma chain; Contains: RecName: Full=Cobra venom factor beta chain; Flags: Precursor >gi|2118405|pir||I51018 cobra venom factor precursor - monocled cobra >gi|319443754|pdb|3PRX|B Chain B, Structure Of Comp…
Unigene23263_NK	641	25517	1870.68	--	--	--	--
Unigene31445_NK	477	18822	1854.28	gi|426244196|ref|XP_004015912.1|	268.1	9e-71	PREDICTED: 40S ribosomal protein S15a-like [Ovis aries]
Unigene6589_NK	1796	68734	1798.43	gi|348549840|ref|XP_003460741.1|	322.4	5e-86	PREDICTED: hypothetical protein LOC100717127 [Cavia porcellus]
Unigene14274_NK	390	14824	1786.2	gi|471407667|ref|XP_004385420.1|	184.9	1e-45	PREDICTED: 60S ribosomal protein L23a [Trichechus manatus latirostris]
Unigene31353_NK	749	27943	1753.15	gi|290560289|pdb|3K7L|A	230.7	5e-59	Chain A, Structures Of Two Elapid Snake Venom Metalloproteases With Distinct Activities Highlight The Disulfide Patterns In The D Domain Of Adamalysin Family Proteins
Unigene6566_NK	609	22632	1746.36	gi|327287930|ref|XP_003228681.1|	380.2	3e-104	PREDICTED: 40S ribosomal protein S4-like [Anolis carolinensis]
Unigene6562_NK	613	22743	1743.48	gi|28804817|dbj|BAC57970.1|	286.2	7e-76	alpha globin [Naja kaouthia]
Unigene31456_NK	282	10233	1705.23	gi|466038075|ref|XP_004275750.1|	133.3	3e-30	PREDICTED: 60S ribosomal protein L38 [Orcinus orca]
Unigene31446_NK	399	14170	1668.88	gi|327262875|ref|XP_003216249.1|	204.5	1e-51	PREDICTED: 60S ribosomal protein L37-like [Anolis carolinensis]
Unigene31439_NK	1008	35432	1651.83	gi|327290569|ref|XP_003229995.1|	572.4	1e-161	PREDICTED: 40S ribosomal protein S2-like [Anolis carolinensis]
Unigene31410_NK	551	18402	1569.43	gi|54035743|sp|Q91132.1|CO3_NAJKA	65.9	1e-09	RecName: Full=Cobra venom factor; Short=CVF; Short=CVFk; AltName: Full=Complement C3 homolog; Contains: RecName: Full=Cobra venom factor alpha chain; Contains: RecName: Full=Cobra venom factor gamma chain; Contains: RecName: Full=Cobra venom factor beta chain; Flags: Precursor >gi|2118405|pir||I51018 cobra venom factor precursor - monocled cobra >gi|319443754|pdb|3PRX|B Chain B, Structure Of Comp…
Unigene15627_NK	486	16054	1552.3	gi|73917399|sp|Q69CJ9.3|RL35_OPHHA	238.4	8e-62	RecName: Full=60S ribosomal protein L35 >gi|38049476|gb|AAR10441.1| ribosomal protein L35 [Ophiophagus hannah]
Unigene31440_NK	578	18995	1544.33	gi|71895103|ref|NP_001026004.1|	316.2	5e-85	40S ribosomal protein S11 [Gallus gallus] >gi|13516490|dbj|BAB40319.1| ribosomal protein S11 [Gallus gallus]
Unigene27446_NK	2667	86162	1518.17	gi|327283838|ref|XP_003226647.1|	1248	0	PREDICTED: polyadenylate-binding protein 1-like [Anolis carolinensis]
CL76.Contig1_NK	5440	164990	1425.24	gi|327271319|ref|XP_003220435.1|	32	2e-14	PREDICTED: UHRF1-binding protein 1-like [Anolis carolinensis]
Unigene31179_NK	1806	53897	1402.41	gi|164420848|ref|YP_001648797.1|	834.3	0	NADH dehydrogenase subunit 5 [Naja naja] >gi|84371460|gb|ABC55914.1| NADH dehydrogenase subunit 5 [Naja naja]
Unigene31438_NK	446	13276	1398.82	gi|297304673|ref|XP_002806420.1|	115.9	5e-25	PREDICTED: hypothetical protein LOC100423472 [Macaca mulatta]
Unigene31441_NK	627	18115	1357.69	gi|444722537|gb|ELW63227.1|	254.2	3e-66	40S ribosomal protein S25 [Tupaia chinensis]
Unigene13603_NK	577	16190	1318.56	gi|332245592|ref|XP_003271942.1|	308.9	8e-83	PREDICTED: 40S ribosomal protein S18 isoform 1 [Nomascus leucogenys]
Unigene13449_NK	275	7711	1317.67	gi|327259999|ref|XP_003214823.1|	121.7	1e-26	PREDICTED: 60S acidic ribosomal protein P2-like [Anolis carolinensis]
Unigene31434_NK	1175	32306	1292.03	gi|338817704|sp|B6S2X0.1|CAMP_NAJAT	379.8	1e-103	RecName: Full=Cathelicidin-NA antimicrobial peptide; AltName: Full=Cathelicidin-related protein; Flags: Precursor >gi|193792525|gb|ACF21000.1| cathelicidin-related protein precursor [Naja atra]
Unigene239_NK	264	7026	1250.64	--	--	--	--
CL1593.Contig1_NK	3379	87921	1222.74	gi|465951230|gb|EMP24249.1|	1685.6	0	Elongation factor 2 [Chelonia mydas]
Unigene1151_NK	745	19372	1221.93	gi|327283014|ref|XP_003226237.1|	394	3e-108	PREDICTED: 60S ribosomal protein L13a-like [Anolis carolinensis]
CL96.Contig1_NK	621	16046	1214.24	--	--	--	--
Unigene31436_NK	923	23780	1210.71	gi|291415306|ref|XP_002723895.1|	131.3	6e-29	PREDICTED: hypothetical protein [Oryctolagus cuniculus]
Unigene6560_NK	860	22147	1210.17	gi|465951585|gb|EMP24441.1|	503.1	7e-141	60S acidic ribosomal protein P0 [Chelonia mydas]
Unigene6565_NK	1424	36110	1191.64	gi|465953164|gb|EMP25261.1|	264.2	1e-68	Apolipoprotein Eb [Chelonia mydas]
Unigene31449_NK	446	10975	1156.37	gi|310756796|gb|ADP20539.1|	239.2	4e-62	40S ribosomal protein S26 [Fukomys anselli] >gi|310756798|gb|ADP20540.1| 40S ribosomal protein S26 [Heterocephalus glaber]
Unigene514_NK	855	20995	1153.93	gi|75570172|sp|Q90WI8.1|CLEC1_BUNFA	312	2e-83	RecName: Full=C-type lectin BFL-1; Flags: Precursor >gi|13876735|gb|AAK43584.1|AF354270_1 C-type lectin-like protein 1 [Bungarus fasciatus]
Unigene13706_NK	201	4743	1108.88	--	--	--	--
CL3939.Contig5_NK	208	4890	1104.78	--	--	--	--
Unigene31444_NK	953	22351	1102.13	gi|52138653|ref|NP_001004379.1|	520.8	3e-146	60S ribosomal protein L7a [Gallus gallus] >gi|417673|sp|P32429.2|RL7A_CHICK RecName: Full=60S ribosomal protein L7a >gi|63778|emb|CAA44506.1| ribosomal protein L7a [Gallus gallus] >gi|601884|dbj|BAA03395.1| ribosomal protein L7a [Gallus gallus] >gi|28866784|dbj|BAC65169.1| ribosomal protein L7a [Gallus gallus]
CL3939.Contig4_NK	306	7129	1094.8	gi|327290871|ref|XP_003230145.1|	56.6	4e-07	PREDICTED: HLA class I histocompatibility antigen, A-69 alpha chain-like, partial [Anolis carolinensis]
CL5589.Contig1_NK	2058	47595	1086.79	--	--	--	--
CL2319.Contig1_NK	369	8524	1085.54	gi|327265789|ref|XP_003217690.1|	138.3	1e-31	PREDICTED: 60S ribosomal protein L29-like [Anolis carolinensis]
CL706.Contig3_NK	2196	50698	1084.89	gi|45269029|gb|AAS55927.1|	768.5	0	cytoskeletal beta actin, partial [Sus scrofa]
Unigene6571_NK	1016	23162	1071.3	gi|14194800|sp|Q9PRL9.1|HBA1_NAJNA	260	1e-67	RecName: Full=Hemoglobin subunit alpha-1; AltName: Full=Alpha-1-globin; AltName: Full=Hemoglobin alpha-1 chain; AltName: Full=Hemoglobin alpha-I chain >gi|913712|gb|AAB34003.1| hemoglobin alpha I chain [Naja naja=cobra snakes, naja, blood, Peptide, 141 aa]
Unigene6593_NK	667	15065	1061.38	gi|440913556|gb|ELR63001.1|	381.7	1e-104	60S ribosomal protein L17, partial [Bos grunniens mutus]
Unigene31451_NK	580	12856	1041.61	gi|334313876|ref|XP_001368281.2|	268.1	1e-70	PREDICTED: hypothetical protein LOC100013927 [Monodelphis domestica]
Unigene31448_NK	515	11362	1036.76	gi|465954254|gb|EMP25805.1|	242.7	5e-63	Ubiquitin-like protein FUBI [Chelonia mydas]
Unigene27776_NK	1062	23355	1033.44	gi|449513901|ref|XP_004176383.1|	42.7	1e-10	PREDICTED: uncharacterized protein LOC100225344 [Taeniopygia guttata]
Unigene31389_NK	610	13281	1023.13	gi|73537140|gb|AAZ77712.1|	113.2	8e-24	MHC class II beta chain [Sphenodon punctatus]
Unigene31443_NK	632	13690	1017.92	gi|395537564|ref|XP_003770768.1|	348.6	1e-94	PREDICTED: 40S ribosomal protein S10-like, partial [Sarcophilus harrisii]
CL2221.Contig2_NK	567	12202	1011.29	gi|395513211|ref|XP_003760822.1|	265.4	1e-69	PREDICTED: ubiquitin-60S ribosomal protein L40 [Sarcophilus harrisii]
CL2518.Contig1_NK	421	9059	1011.18	--	--	--	--
CL5151.Contig2_NK	378	7931	985.973	--	--	--	--
Unigene31453_NK	514	10623	971.21	gi|345329793|ref|XP_001513459.2|	292.7	4e-78	PREDICTED: 40S ribosomal protein S15-like [Ornithorhynchus anatinus]
Unigene13520_NK	431	8807	960.24	gi|122527|sp|P22743.1|HBB2_NAJNA	246.5	2e-64	RecName: Full=Hemoglobin subunit beta-2; AltName: Full=Beta-2-globin; AltName: Full=Hemoglobin beta-2 chain; AltName: Full=Hemoglobin beta-II chain
CL1005.Contig2_NK	1013	20539	952.793	gi|32469675|sp|P82942.1|VM3K_NAJKA	426.8	8e-118	RecName: Full=Hemorrhagic metalloproteinase-disintegrin kaouthiagin; AltName: Full=Snake venom metalloproteinase; Short=SVMP
Unigene6563_NK	683	13771	947.488	gi|426253563|ref|XP_004020462.1|	95.1	2e-18	PREDICTED: thymosin beta-4-like [Ovis aries]
Unigene31450_NK	649	13034	943.761	gi|327268884|ref|XP_003219225.1|	310.1	5e-83	PREDICTED: 60S ribosomal protein L24-like [Anolis carolinensis]
Unigene6921_NK	825	16333	930.338	gi|327271079|ref|XP_003220315.1|	427.2	4e-118	PREDICTED: 40S ribosomal protein S8-like [Anolis carolinensis]
CL4112.Contig1_NK	343	6744	923.958	--	--	--	--
Unigene31435_NK	1892	36974	918.341	gi|327264037|ref|XP_003216823.1|	807	0	PREDICTED: calreticulin-like [Anolis carolinensis]
CL562.Contig1_NK	1946	37937	916.113	--	--	--	--
Unigene31447_NK	628	12240	915.905	gi|348558842|ref|XP_003465225.1|	370.2	3e-101	PREDICTED: 60S ribosomal protein L18a-like [Cavia porcellus]
CL1005.Contig1_NK	1064	20467	903.944	gi|32469675|sp|P82942.1|VM3K_NAJKA	410.2	8e-113	RecName: Full=Hemorrhagic metalloproteinase-disintegrin kaouthiagin; AltName: Full=Snake venom metalloproteinase; Short=SVMP
Unigene24533_NK	1459	27912	899.01	gi|403334965|gb|EJY66653.1|	84.3	3e-101	hypothetical protein OXYTRI_13058 [Oxytricha trifallax]
Unigene22262_NK	1321	25084	892.325	gi|327285404|ref|XP_003227423.1|	611.7	2e-173	PREDICTED: zinc transporter 2-like [Anolis carolinensis]
Unigene31459_NK	866	15998	868.114	gi|327263697|ref|XP_003216654.1|	481.9	1e-134	PREDICTED: 40S ribosomal protein S6-like [Anolis carolinensis]
CL5565.Contig1_NK	2060	38047	867.925	gi|403309913|gb|AFR33841.1|	719.2	0	immunoglobulin M heavy chain constant region, partial [Orthriophis taeniurus]
Unigene31455_NK	889	16378	865.741	gi|82219689|sp|Q98TX2.3|RS3A_OPHHA	529.6	7e-149	RecName: Full=40S ribosomal protein S3a >gi|12958634|gb|AAK09383.1|AF321768_1 ribosomal protein S3a [Ophiophagus hannah]
Unigene22128_NK	3292	59848	854.316	gi|426236749|ref|XP_004012330.1|	840.1	0	PREDICTED: elongation factor 1-alpha 1-like [Ovis aries]
Unigene31467_NK	545	9675	834.225	gi|327280376|ref|XP_003224928.1|	267.7	1e-70	PREDICTED: 60S ribosomal protein L32-like [Anolis carolinensis]
Unigene30355_NK	289	5024	816.922	--	--	--	--
Unigene6582_NK	572	9780	803.474	--	--	--	--
Unigene31462_NK	452	7676	798.041	gi|82216089|sp|Q8UW19.1|RL36_LAPHA	211.1	1e-53	RecName: Full=60S ribosomal protein L36 >gi|18000285|gb|AAL54904.1|AF159903_1 60S ribosomal protein L36 [Lapemis hardwickii]
Unigene6922_NK	485	8214	795.87	gi|327274943|ref|XP_003222234.1|	263.5	2e-69	PREDICTED: 60S ribosomal protein L14-like [Anolis carolinensis]
Unigene31465_NK	469	7917	793.262	gi|444727930|gb|ELW68403.1|	227.6	1e-58	Mitochondrial folate transporter/carrier [Tupaia chinensis]
CL4229.Contig1_NK	619	10448	793.179	gi|84029303|sp|P0C0U8.1|HBB1_DRYCE	265.8	1e-69	RecName: Full=Hemoglobin subunit beta-1; AltName: Full=Beta-1-globin; AltName: Full=Hemoglobin beta-1 chain; AltName: Full=Hemoglobin beta-I chain
Unigene6633_NK	1230	20666	789.551	gi|327272028|ref|XP_003220788.1|	392.1	3e-107	PREDICTED: endonuclease domain-containing 1 protein-like [Anolis carolinensis]
CL50.Contig2_NK	286	4776	784.742	gi|397498485|ref|XP_003820013.1|	156	4e-37	PREDICTED: heat shock cognate 71 kDa protein [Pan paniscus]
Unigene31442_NK	881	14596	778.551	gi|334329628|ref|XP_003341246.1|	224.2	6e-57	PREDICTED: hypothetical protein LOC100619384 [Monodelphis domestica]
Unigene31452_NK	1281	21163	776.349	gi|224062820|ref|XP_002200110.1|	703.7	0	PREDICTED: 60S ribosomal protein L4 [Taeniopygia guttata]
Unigene6559_NK	812	13409	776.013	gi|31873372|emb|CAD97677.1|	390.2	6e-107	hypothetical protein [Homo sapiens]
Unigene7860_NK	555	8841	748.578	--	--	--	--
Unigene31463_NK	690	10954	746.024	gi|449283666|gb|EMC90271.1|	379	1e-103	40S ribosomal protein S7, partial [Columba livia]
Unigene28764_NK	1974	31106	740.501	gi|327276168|ref|XP_003222842.1|	1129.8	0	PREDICTED: heat shock cognate 71 kDa protein-like [Anolis carolinensis]
CL4708.Contig1_NK	778	12147	733.7	gi|226372474|gb|ACO51862.1|	384.8	2e-105	Transposable element Tc1 transposase [Rana catesbeiana]
CL3786.Contig3_NK	832	12932	730.418	--	--	--	--
Unigene13630_NK	3675	56632	724.158	gi|327259929|ref|XP_003214788.1|	776.5	0	PREDICTED: nucleobindin-2-like [Anolis carolinensis]
Unigene13631_NK	1027	15717	719.164	--	--	--	--
CL3352.Contig2_NK	2136	32334	711.356	gi|161408085|dbj|BAF94146.1|	1035	0	heat shock protein 90a [Alligator mississippiensis]
CL216.Contig1_NK	1980	29415	698.124	--	--	--	--
Unigene30357_NK	828	12001	681.108	--	--	--	--
Unigene29144_NK	708	10258	680.861	gi|327271967|ref|XP_003220758.1|	223.4	7e-57	PREDICTED: pancreatic progenitor cell differentiation and proliferation factor-like [Anolis carolinensis]
Unigene31466_NK	498	7191	678.561	gi|327280582|ref|XP_003225031.1|	261.2	1e-68	PREDICTED: 60S ribosomal protein L28-like [Anolis carolinensis]
CL1925.Contig2_NK	2556	36862	677.715	gi|224073965|ref|XP_002192655.1|	1231.8	0	PREDICTED: 78 kDa glucose-regulated protein [Taeniopygia guttata]
CL689.Contig1_NK	2694	38606	673.42	--	--	--	--
Unigene6567_NK	330	4721	672.278	gi|449269808|gb|EMC80554.1|	163.3	3e-39	40S ribosomal protein S4, partial [Columba livia]
Unigene6568_NK	777	11053	668.479	gi|327285534|ref|XP_003227488.1|	397.5	3e-109	PREDICTED: 60S ribosomal protein L13-like [Anolis carolinensis]
Unigene31468_NK	465	6525	659.411	gi|449280784|gb|EMC88010.1|	252.3	5e-66	60S ribosomal protein L31 [Columba livia]
Unigene31461_NK	1030	14424	658.078	gi|395504470|ref|XP_003756572.1|	60.8	1e-07	PREDICTED: uncharacterized protein LOC100925129 [Sarcophilus harrisii]
Unigene31351_NK	363	5068	656.083	--	--	--	--
CL4730.Contig2_NK	500	6869	645.583	--	--	--	--
Unigene27155_NK	662	9004	639.155	gi|327266865|ref|XP_003218224.1|	317.8	2e-85	PREDICTED: neprilysin-like [Anolis carolinensis]
Unigene6579_NK	1166	15567	627.387	gi|88909649|sp|P84175.2|RS12_CHICK	267.7	8e-70	RecName: Full=40S ribosomal protein S12
Unigene22646_NK	349	4653	626.522	gi|470602254|ref|XP_004312818.1|	138.3	1e-31	PREDICTED: 40S ribosomal protein S28 [Tursiops truncatus]
Unigene31458_NK	599	7984	626.358	gi|410911834|ref|XP_003969395.1|	186.8	5e-46	PREDICTED: leucine-rich repeat-containing protein 71-like [Takifugu rubripes]
Unigene24661_NK	6804	87244	602.56	--	--	--	--
Unigene14240_NK	201	2567	600.149	gi|449265858|gb|EMC76988.1|	65.1	1e-09	60S ribosomal protein L34, partial [Columba livia]
CL4422.Contig1_NK	1198	15288	599.684	gi|327269474|ref|XP_003219519.1|	219.2	3e-55	PREDICTED: 60S acidic ribosomal protein P1-like [Anolis carolinensis]
Unigene31460_NK	1158	14614	593.047	gi|431890628|gb|ELK01507.1|	235.7	3e-60	Eukaryotic translation initiation factor 1 [Pteropus alecto]
Unigene13614_NK	2012	25387	592.942	gi|199584370|gb|AAF99282.2|AF256650_1	291.6	1e-76	MHC class II alpha chain [Caiman crocodilus]
Unigene25680_NK	1685	20966	584.715	gi|327266278|ref|XP_003217933.1|	672.2	0	PREDICTED: guanine nucleotide-binding protein subunit beta-2-like 1-like [Anolis carolinensis]
Unigene864_NK	1009	12521	583.145	gi|239618535|gb|ACR83840.1|	80.5	1e-13	cystatin precursor [Pseudonaja textilis]
Unigene951_NK	548	6769	580.461	gi|395748407|ref|XP_002826939.2|	191.8	1e-47	PREDICTED: uncharacterized protein LOC100432952 [Pongo abelii]
Unigene22648_NK	2180	26926	580.423	gi|327277318|ref|XP_003223412.1|	793.9	0	PREDICTED: 55 kDa erythrocyte membrane protein-like [Anolis carolinensis]
Unigene6581_NK	825	10121	576.499	gi|327281458|ref|XP_003225465.1|	479.2	1e-133	PREDICTED: 40S ribosomal protein S3-like [Anolis carolinensis]
Unigene6584_NK	703	8582	573.67	gi|318054482|gb|ADV35659.1|	181.8	2e-44	proopiomelanocortin [Agkistrodon piscivorus]
Unigene810_NK	821	9925	568.089	gi|327273495|ref|XP_003221516.1|	364.8	2e-99	PREDICTED: 60S ribosomal protein L9-like [Anolis carolinensis]
Unigene31454_NK	652	7759	559.226	gi|327281641|ref|XP_003225555.1|	314.3	2e-84	PREDICTED: 60S ribosomal protein L21-like [Anolis carolinensis]
Unigene31476_NK	911	10715	552.717	gi|327269687|ref|XP_003219624.1|	461.8	2e-128	PREDICTED: 60S ribosomal protein L7-like [Anolis carolinensis]
CL4263.Contig1_NK	2541	29817	551.427	gi|449495454|ref|XP_002191900.2|	47	8e-54	PREDICTED: uncharacterized protein LOC100228131 [Taeniopygia guttata]
Unigene6580_NK	870	10151	548.3	gi|38374146|gb|AAR19276.1|	310.8	5e-83	venom gland cyclophilin [Bitis gabonica]
Unigene25330_NK	1029	11761	537.103	gi|388452552|ref|NP_001253938.1|	563.1	7e-159	ADP/ATP translocase 2 [Macaca mulatta] >gi|178661|gb|AAA51737.1| adenine nucleotide translocator-2 [Homo sapiens] >gi|1381112|gb|AAB39266.1| ADP/ATP carrier protein [Homo sapiens] >gi|33525218|gb|AAH56160.1| Solute carrier family 25 (mitochondrial carrier; adenine nucleotide translocator), member 5 [Homo sapiens] >gi|119610276|gb|EAW89870.1| solute carrier family 25 (mitochondrial carrier; adenin…
Unigene6607_NK	399	4501	530.109	gi|326931897|ref|XP_003212060.1|	162.5	5e-39	PREDICTED: 40S ribosomal protein S21-like [Meleagris gallopavo]
CL785.Contig2_NK	596	6709	528.981	gi|82193158|sp|Q53B55.1|NXL31_OPHHA	72.8	1e-11	RecName: Full=Long neurotoxin-like OH-31; Flags: Precursor >gi|51105379|gb|AAT97253.1| long chain neurotoxin-like protein [Ophiophagus hannah]
Unigene31477_NK	566	6370	528.874	gi|392350286|ref|XP_003750613.1|	270	4e-71	PREDICTED: 40S ribosomal protein S17-like [Rattus norvegicus]
Unigene13732_NK	440	4916	525.035	--	--	--	--
Unigene14160_NK	533	5855	516.213	gi|327277659|ref|XP_003223581.1|	268.5	1e-70	PREDICTED: elongation factor 1-beta-like [Anolis carolinensis]
Unigene31478_NK	514	5607	512.621	gi|224046266|ref|XP_002198037.1|	236.5	4e-61	PREDICTED: 40S ribosomal protein S20 [Taeniopygia guttata] >gi|363730787|ref|XP_428540.3| PREDICTED: uncharacterized protein LOC430990 [Gallus gallus] >gi|387913924|gb|AFK10571.1| hypothetical protein [Callorhinchus milii]
Unigene14273_NK	256	2785	511.227	gi|327291940|ref|XP_003230678.1|	120.2	3e-26	PREDICTED: 60S ribosomal protein L23a-like [Anolis carolinensis]
Unigene21526_NK	698	7564	509.243	gi|327276214|ref|XP_003222865.1|	100.9	5e-20	PREDICTED: phospholipase A2 inhibitor subunit gamma B-like [Anolis carolinensis]
Unigene31474_NK	534	5750	506.006	gi|444730664|gb|ELW71038.1|	299.3	5e-80	40S ribosomal protein S19 [Tupaia chinensis]
Unigene31405_NK	205	2206	505.685	--	--	--	--
Unigene467_NK	984	10507	501.779	gi|327281159|ref|XP_003225317.1|	321.2	4e-86	PREDICTED: ferritin heavy chain A-like [Anolis carolinensis]
Unigene14093_NK	1094	11638	499.908	gi|327264405|ref|XP_003217004.1|	458.8	2e-127	PREDICTED: bax inhibitor 1-like isoform 1 [Anolis carolinensis] >gi|327264407|ref|XP_003217005.1| PREDICTED: bax inhibitor 1-like isoform 2 [Anolis carolinensis] >gi|327264409|ref|XP_003217006.1| PREDICTED: bax inhibitor 1-like isoform 3 [Anolis carolinensis]
Unigene31470_NK	742	7888	499.565	gi|327264270|ref|XP_003216937.1|	445.3	1e-123	PREDICTED: 60S ribosomal protein L10-like [Anolis carolinensis]
Unigene22196_NK	426	4507	497.172	gi|444705585|gb|ELW46991.1|	129	6e-29	40S ribosomal protein S29 [Tupaia chinensis]
CL3352.Contig1_NK	2374	25065	496.153	gi|327262270|ref|XP_003215948.1|	1356.7	0	PREDICTED: heat shock cognate protein HSP 90-beta-like [Anolis carolinensis]
Unigene31464_NK	1844	19426	495.053	gi|16930529|gb|AAL31950.1|	124	4e-87	CDH1-D [Gallus gallus]
Unigene23215_NK	233	2429	489.892	--	--	--	--
Unigene7760_NK	717	7424	486.573	gi|224051739|ref|XP_002200608.1|	407.5	2e-112	PREDICTED: heat shock protein HSP 90-alpha [Taeniopygia guttata]
Unigene21365_NK	1909	19644	483.563	gi|224051518|ref|XP_002200570.1|	561.6	5e-158	PREDICTED: proto-oncogene c-Fos [Taeniopygia guttata]
Unigene13749_NK	539	5521	481.347	gi|78057023|emb|CAJ32313.1|	154.8	1e-36	Metallothionein [Elaphe quatuorlineata]
CL817.Contig1_NK	2442	24953	480.182	gi|123916680|sp|Q4JHE3.1|OXLA_OXYSC	916.8	0	RecName: Full=L-amino-acid oxidase; Short=LAAO; Short=LAO; Flags: Precursor >gi|68304016|gb|AAY89680.1| L-amino acid oxidase precursor [Oxyuranus scutellatus]
CL5594.Contig1_NK	351	3557	476.218	--	--	--	--
Unigene28525_NK	1631	16481	474.852	gi|116242842|sp|P83234.2|VESP_OPHHA	360.5	1e-97	RecName: Full=Ohanin; Flags: Precursor >gi|70907886|gb|AAR07992.2| Ohanin precursor [Ophiophagus hannah] >gi|70927665|gb|AAZ15707.1| Ohanin precursor [Ophiophagus hannah]
CL1832.Contig2_NK	535	5383	472.824	gi|75832160|ref|NP_001028815.1|	57.4	3e-07	complement component (3b/4b) receptor 1-like precursor [Gallus gallus] >gi|71795167|dbj|BAE16762.1| complement regulatory GPI-anchor protein [Gallus gallus]
Unigene31472_NK	1047	10497	471.137	gi|327278514|ref|XP_003224007.1|	595.9	1e-168	PREDICTED: 40S ribosomal protein SA-like [Anolis carolinensis]
Unigene31485_NK	672	6726	470.345	gi|327280722|ref|XP_003225100.1|	363.2	5e-99	PREDICTED: 60S ribosomal protein L18-like [Anolis carolinensis]
CL1983.Contig2_NK	649	6471	468.55	gi|382934454|gb|AFG31701.1|	189.5	1e-46	MHC class II antigen DR beta chain, partial [Saccopteryx bilineata]
Unigene22251_NK	2894	28471	462.31	gi|45382329|ref|NP_990729.1|	325.1	1e-86	translationally-controlled tumor protein homolog [Gallus gallus] >gi|1174624|sp|P43347.1|TCTP_CHICK RecName: Full=Translationally-controlled tumor protein homolog; Short=TCTP; AltName: Full=p23; AltName: Full=pCHK23 >gi|517091|dbj|BAA05374.1| transrationally controlled tumor protein [Gallus gallus] >gi|825782|gb|AAA67296.1| growth-related translationally controlled tumor protein [Gallus gallus]
Unigene31471_NK	870	8484	458.258	gi|465959168|gb|EMP28296.1|	136.3	1e-30	Chelonianin [Chelonia mydas]
CL3932.Contig1_NK	524	5032	451.272	gi|281350307|gb|EFB25891.1|	290	3e-77	hypothetical protein PANDA_004337 [Ailuropoda melanoleuca]
Unigene22263_NK	4365	41442	446.155	gi|327271319|ref|XP_003220435.1|	54.7	1e-20	PREDICTED: UHRF1-binding protein 1-like [Anolis carolinensis]
Unigene26656_NK	1433	13556	444.543	gi|449470945|ref|XP_002194183.2|	632.1	2e-179	PREDICTED: annexin A2 [Taeniopygia guttata]
Unigene8214_NK	736	6954	444.003	gi|291383383|ref|XP_002708285.1|	309.3	1e-82	PREDICTED: ribosomal protein S14-like [Oryctolagus cuniculus]
Unigene20418_NK	523	4912	441.353	gi|327275475|ref|XP_003222499.1|	275.4	8e-73	PREDICTED: 60S ribosomal protein L27-like [Anolis carolinensis]
Unigene25329_NK	324	3036	440.337	--	--	--	--
Unigene920_NK	841	7878	440.199	gi|332817231|ref|XP_003309920.1|	327.8	4e-88	PREDICTED: 60S ribosomal protein L12-like [Pan troglodytes]
Unigene30564_NK	1050	9643	431.57	gi|17384256|emb|CAC83675.1|	54.7	9e-06	mucin 5 [Homo sapiens]
CL196.Contig5_NK	3389	30885	428.257	gi|338855302|gb|AEJ31980.1|	1525.8	0	phosphodiesterase 1 [Crotalus adamanteus]
Unigene27154_NK	1125	10138	423.476	gi|52138713|ref|NP_001004412.1|	288.1	5e-76	neprilysin [Gallus gallus] >gi|38607474|gb|AAR25613.1| neprilysin [Gallus gallus]
Unigene27153_NK	4117	37013	422.476	gi|327266865|ref|XP_003218224.1|	677.9	0	PREDICTED: neprilysin-like [Anolis carolinensis]
CL5013.Contig1_NK	494	4406	419.128	gi|126309232|ref|XP_001366082.1|	89	9e-17	PREDICTED: profilin-1-like isoform 1 [Monodelphis domestica] >gi|334323308|ref|XP_003340377.1| PREDICTED: profilin-1-like isoform 2 [Monodelphis domestica]
Unigene6848_NK	739	6591	419.118	gi|13385036|ref|NP_079862.1|	427.9	2e-118	60S ribosomal protein L15 [Mus musculus] >gi|15431293|ref|NP_002939.2| 60S ribosomal protein L15 isoform 1 [Homo sapiens] >gi|20806169|ref|NP_620814.1| 60S ribosomal protein L15 [Rattus norvegicus] >gi|118150852|ref|NP_001071334.1| 60S ribosomal protein L15 [Bos taurus] >gi|197102206|ref|NP_001127692.1| 60S ribosomal protein L15 [Pongo abelii] >gi|302148496|ref|NP_001180490.1| ribosomal protein L…
CL5644.Contig2_NK	2213	19225	408.238	gi|465990854|gb|EMP38506.1|	815.5	0	Elongation factor 1-gamma [Chelonia mydas]
Unigene6711_NK	1859	16114	407.336	gi|45383890|ref|NP_989441.1|	838.6	0	protein disulfide-isomerase A3 precursor [Gallus gallus] >gi|82243463|sp|Q8JG64.1|PDIA3_CHICK RecName: Full=Protein disulfide-isomerase A3; AltName: Full=Endoplasmic reticulum resident protein 57; Short=ER protein 57; Short=ERp57; AltName: Full=Glucose-regulated thiol oxidoreductase 58 kDa protein; Flags: Precursor >gi|22651801|gb|AAM82759.1| glucose regulated thiol oxidoreductase protein precurs…
Unigene25179_NK	1616	13950	405.66	gi|18000293|gb|AAL54908.1|AF165225_1	1094.7	0	eukaryotic translation inititation factor 4B [Lapemis hardwickii]
Unigene31475_NK	1069	9071	398.755	gi|327270707|ref|XP_003220130.1|	594	4e-168	PREDICTED: 60S ribosomal protein L5-like [Anolis carolinensis]
Unigene31469_NK	849	7176	397.195	gi|327266268|ref|XP_003217928.1|	402.5	1e-110	PREDICTED: 40S ribosomal protein S5-like [Anolis carolinensis]
CL1336.Contig3_NK	775	6520	395.344	gi|301605491|ref|XP_002932355.1|	54.7	5e-06	PREDICTED: hypothetical protein LOC100494796 [Xenopus (Silurana) tropicalis]
Unigene31473_NK	1702	14293	394.632	gi|18000297|gb|AAL54910.1|	593.2	1e-167	unknown [Lapemis hardwickii]
Unigene30364_NK	376	3153	394.062	gi|449486227|ref|XP_002193143.2|	174.5	1e-42	PREDICTED: minor histocompatibility antigen H13 [Taeniopygia guttata]
Unigene30763_NK	897	7435	389.509	gi|327278842|ref|XP_003224169.1|	364.8	3e-99	PREDICTED: ferritin heavy chain-like [Anolis carolinensis]
Unigene1006_NK	1168	9583	385.556	--	--	--	--
CL4462.Contig2_NK	1451	11851	383.81	gi|225706552|gb|ACO09122.1|	280.4	1e-73	Cofilin-2 [Osmerus mordax]
Unigene347_NK	1050	8478	379.431	gi|327269296|ref|XP_003219430.1|	255.8	2e-66	PREDICTED: GTPase IMAP family member 4-like [Anolis carolinensis]
Unigene14243_NK	2744	21942	375.769	gi|327264864|ref|XP_003217231.1|	1395.2	0	PREDICTED: SEC14-like protein 1-like [Anolis carolinensis]
Unigene31479_NK	625	4985	374.812	gi|60334810|gb|AAH90618.1|	293.9	3e-78	Rps16 protein [Mus musculus]
Unigene28662_NK	388	3086	373.76	--	--	--	--
Unigene31509_NK	297	2351	371.985	gi|52078478|gb|AAU25919.1|	130.2	3e-29	G protein-binding protein [Oxyuranus scutellatus scutellatus]
Unigene31493_NK	725	5726	371.144	gi|327282332|ref|XP_003225897.1|	382.5	1e-104	PREDICTED: 40S ribosomal protein S9-like [Anolis carolinensis]
Unigene6550_NK	865	6823	370.671	gi|327268441|ref|XP_003219006.1|	524.2	3e-147	PREDICTED: 60S ribosomal protein L8-like [Anolis carolinensis]
CL1222.Contig2_NK	302	2378	370.027	--	--	--	--
Unigene30573_NK	994	7667	362.467	--	--	--	--
Unigene31457_NK	1590	12203	360.66	gi|327280822|ref|XP_003225150.1|	485.7	2e-135	PREDICTED: 60S ribosomal protein L6-like [Anolis carolinensis]
Unigene6577_NK	693	5281	358.106	gi|197129473|gb|ACH45971.1|	58.5	9e-63	putative ornithine decarboxylase antizyme variant 1 [Taeniopygia guttata]
Unigene25658_NK	889	6771	357.915	gi|338817703|sp|B6D434.1|CAMP_BUNFA	161.4	5e-38	RecName: Full=Cathelicidin-BF antimicrobial peptide; AltName: Full=Cathelicidin-related protein; Flags: Precursor >gi|193792527|gb|ACF21001.1| cathelicidin-related protein precursor [Bungarus fasciatus] >gi|206944351|gb|ACI22652.1| cathelicidin-BF [Bungarus fasciatus]
Unigene31487_NK	862	6525	355.715	gi|327281161|ref|XP_003225318.1|	313.5	8e-84	PREDICTED: ferritin light chain, oocyte isoform-like [Anolis carolinensis]
Unigene31492_NK	1135	8539	353.541	gi|327273845|ref|XP_003221690.1|	349	2e-94	PREDICTED: signal peptidase complex subunit 3-like [Anolis carolinensis]
Unigene31480_NK	1839	13791	352.406	gi|327288752|ref|XP_003229089.1|	828.5	0	PREDICTED: d-3-phosphoglycerate dehydrogenase-like [Anolis carolinensis]
Unigene504_NK	2961	22147	351.484	gi|327280272|ref|XP_003224876.1|	608.6	6e-172	PREDICTED: tumor necrosis factor receptor superfamily member 11B-like [Anolis carolinensis]
Unigene14241_NK	332	2474	350.179	gi|403275765|ref|XP_003945197.1|	193	3e-48	PREDICTED: LOW QUALITY PROTEIN: 60S ribosomal protein L34 [Saimiri boliviensis boliviensis]
Unigene6585_NK	993	7294	345.18	--	--	--	--
Unigene13519_NK	1387	10115	342.703	gi|34555782|gb|AAN05099.1|	620.5	6e-176	lactate dehydrogenase B [Iguana iguana]
Unigene610_NK	1633	11908	342.674	gi|395729727|ref|XP_002810115.2|	174.1	1e-41	PREDICTED: LOW QUALITY PROTEIN: mucin-1 isoform 1 [Pongo abelii]
CL2497.Contig1_NK	568	4095	338.793	gi|56118966|ref|NP_001007968.1|	229.9	4e-59	60S ribosomal protein L30 [Gallus gallus] >gi|54039169|sp|P67883.2|RL30_CHICK RecName: Full=60S ribosomal protein L30 >gi|54039170|sp|P67884.2|RL30_OPHHA RecName: Full=60S ribosomal protein L30 >gi|10442706|gb|AAG17442.1|AF297033_1 ribosomal protein L30 [Ophiophagus hannah] >gi|402507|dbj|BAA03394.1| ribosomal protein L30 [Gallus gallus] >gi|86355135|dbj|BAE78802.1| ribosomal protein L30 [Pelodis…
Unigene31486_NK	476	3374	333.094	gi|126344552|ref|XP_001378524.1|	161.8	9e-39	PREDICTED: hypothetical protein LOC100028506 [Monodelphis domestica]
CL617.Contig1_NK	952	6731	332.255	--	--	--	--
Unigene6741_NK	254	1789	330.983	--	--	--	--
Unigene6573_NK	2301	15912	324.965	gi|57525168|ref|NP_001006186.1|	392.1	7e-107	transmembrane emp24 domain-containing protein 2 precursor [Gallus gallus]
Unigene23192_NK	3030	20798	322.558	gi|465967289|gb|EMP31293.1|	674.1	0	Thioredoxin-interacting protein [Chelonia mydas]
Unigene14094_NK	1226	8403	322.087	--	--	--	--
Unigene21923_NK	626	4286	321.741	gi|47604951|ref|NP_990284.1|	322.8	7e-87	ubiquitin-40S ribosomal protein S27a [Gallus gallus] >gi|302393814|sp|P79781.3|RS27A_CHICK RecName: Full=Ubiquitin-40S ribosomal protein S27a; AltName: Full=Ubiquitin carboxyl extension protein 80; Contains: RecName: Full=Ubiquitin; Contains: RecName: Full=40S ribosomal protein S27a; Flags: Precursor >gi|1763015|gb|AAC60279.1| ubiquitin/ribosomal protein [Gallus gallus] >gi|300676798|gb|ADK26674.…
CL3748.Contig2_NK	1999	13523	317.899	gi|327265958|ref|XP_003217774.1|	926.8	0	PREDICTED: protein transport protein Sec61 subunit alpha isoform 1-like [Anolis carolinensis]
Unigene31497_NK	1189	7963	314.72	gi|327276853|ref|XP_003223181.1|	547.7	4e-154	PREDICTED: eukaryotic translation initiation factor 3 subunit F-like [Anolis carolinensis]
Unigene1067_NK	770	5141	313.752	gi|327272706|ref|XP_003221125.1|	171.8	3e-41	PREDICTED: matrix Gla protein-like [Anolis carolinensis]
Unigene31503_NK	978	6459	310.353	gi|449272455|gb|EMC82372.1|	354.4	5e-96	Myosin regulatory light chain 2, smooth muscle minor isoform, partial [Columba livia]
Unigene22672_NK	1600	10358	304.218	gi|327281598|ref|XP_003225534.1|	203.8	2e-50	PREDICTED: prothymosin alpha-like [Anolis carolinensis]
Unigene14109_NK	394	2550	304.139	--	--	--	--
Unigene31515_NK	356	2295	302.943	--	--	--	--
CL1336.Contig4_NK	797	5114	301.531	gi|301605491|ref|XP_002932355.1|	65.9	2e-09	PREDICTED: hypothetical protein LOC100494796 [Xenopus (Silurana) tropicalis]
Unigene91_NK	3264	20934	301.392	gi|163915111|ref|NP_001106542.1|	314.7	2e-83	ZFP36 ring finger protein [Xenopus (Silurana) tropicalis] >gi|159155749|gb|AAI54919.1| zfp36 protein [Xenopus (Silurana) tropicalis]
Unigene6583_NK	776	4973	301.152	gi|134048900|dbj|BAF49516.1|	316.6	7e-85	preproopiomelanocortin [Boiga irregularis]
Unigene31489_NK	1165	7462	300.994	gi|148678309|gb|EDL10256.1|	174.9	7e-42	mCG132689 [Mus musculus]
Unigene21555_NK	262	1669	299.353	--	--	--	--
CL5605.Contig1_NK	1573	9998	298.685	gi|32469675|sp|P82942.1|VM3K_NAJKA	194.1	1e-47	RecName: Full=Hemorrhagic metalloproteinase-disintegrin kaouthiagin; AltName: Full=Snake venom metalloproteinase; Short=SVMP
CL483.Contig3_NK	208	1306	295.059	gi|340384387|ref|XP_003390694.1|	70.9	2e-11	PREDICTED: uncharacterized protein K02A2.6-like, partial [Amphimedon queenslandica]
CL4096.Contig2_NK	1230	7641	291.927	gi|327265494|ref|XP_003217543.1|	205.3	5e-51	PREDICTED: HLA class II histocompatibility antigen gamma chain-like [Anolis carolinensis]
Unigene3_NK	2153	13338	291.122	gi|4378025|gb|AAD19348.1|	31.6	8e-113	reverse transcriptase-like protein [Takifugu rubripes]
CL2771.Contig2_NK	1717	10587	289.755	gi|348580683|ref|XP_003476108.1|	25.4	0	PREDICTED: tubulin alpha-1B chain-like [Cavia porcellus]
Unigene451_NK	1596	9778	287.903	gi|354496917|ref|XP_003510570.1|	298.1	8e-79	PREDICTED: calmodulin-like [Cricetulus griseus]
Unigene6575_NK	1605	9779	286.318	gi|327269807|ref|XP_003219684.1|	721.5	0	PREDICTED: translocating chain-associated membrane protein 1-like 1-like isoform 1 [Anolis carolinensis]
CL155.Contig1_NK	1988	11873	280.655	gi|327266658|ref|XP_003218121.1|	401.4	9e-110	PREDICTED: zinc finger protein RFP-like [Anolis carolinensis]
Unigene31488_NK	1991	11871	280.185	gi|327261224|ref|XP_003215431.1|	481.5	7e-134	PREDICTED: 14-3-3 protein theta-like [Anolis carolinensis]
Unigene29112_NK	450	2669	278.718	--	--	--	--
CL859.Contig2_NK	466	2758	278.123	gi|82794006|ref|XP_728268.1|	57.4	2e-07	hypothetical protein [Plasmodium yoelii yoelii 17XNL] >gi|23484531|gb|EAA19833.1| hypothetical protein [Plasmodium yoelii yoelii]
Unigene25175_NK	679	4015	277.872	gi|18000293|gb|AAL54908.1|AF165225_1	151.8	2e-35	eukaryotic translation inititation factor 4B [Lapemis hardwickii]
CL202.Contig3_NK	2042	11868	273.118	gi|363741664|ref|XP_003642537.1|	520.8	1e-145	PREDICTED: minor histocompatibility antigen H13 isoform 1 [Gallus gallus]
Unigene23216_NK	5843	33868	272.385	gi|327267143|ref|XP_003218362.1|	2400.9	0	PREDICTED: vigilin-like [Anolis carolinensis]
Unigene24916_NK	720	4170	272.165	gi|327278629|ref|XP_003224063.1|	116.7	1e-24	PREDICTED: 6-phosphofructo-2-kinase/fructose-2,6-biphosphatase 2-like [Anolis carolinensis]
CL3939.Contig10_NK	1578	9137	272.098	gi|188501739|gb|ACD54838.1|	430.6	1e-118	MHC class I antigen [Iguana iguana]
CL3939.Contig3_NK	326	1877	270.567	gi|213383|gb|AAA49389.1|	161.4	1e-38	MHC class I protein, partial [Nerodia sipedon]
Unigene380_NK	1326	7613	269.8	gi|327269294|ref|XP_003219429.1|	242.3	4e-62	PREDICTED: GTPase IMAP family member 2-like [Anolis carolinensis]
Unigene30725_NK	521	2967	267.614	--	--	--	--
Unigene31491_NK	962	5464	266.91	gi|465978233|gb|EMP34974.1|	421	4e-116	Sn1-specific diacylglycerol lipase beta [Chelonia mydas]
CL1065.Contig1_NK	578	3282	266.833	--	--	--	--
Unigene31482_NK	933	5297	266.795	gi|327264882|ref|XP_003217239.1|	310.8	6e-83	PREDICTED: 60S ribosomal protein L27a-like [Anolis carolinensis]
Unigene706_NK	3016	17089	266.265	gi|327261299|ref|XP_003215468.1|	833.6	0	PREDICTED: protein disulfide-isomerase A6-like [Anolis carolinensis]
Unigene6576_NK	925	5239	266.156	gi|465993400|gb|EMP39229.1|	304.7	4e-81	Dr1-associated corepressor [Chelonia mydas]
Unigene25685_NK	784	4419	264.873	gi|327286244|ref|XP_003227841.1|	394.8	2e-108	PREDICTED: integral membrane protein 2A-like [Anolis carolinensis]
Unigene25671_NK	2077	11625	263.018	gi|327263321|ref|XP_003216468.1|	481.5	7e-134	PREDICTED: solute carrier family 12 member 2-like [Anolis carolinensis]
Unigene30698_NK	678	3793	262.895	--	--	--	--
Unigene26867_NK	988	5507	261.931	gi|326933506|ref|XP_003212844.1|	346.7	1e-93	PREDICTED: translocon-associated protein subunit beta-like [Meleagris gallopavo]
Unigene8404_NK	1312	7298	261.396	gi|327265631|ref|XP_003217611.1|	322	4e-86	PREDICTED: mesencephalic astrocyte-derived neurotrophic factor-like [Anolis carolinensis]
Unigene6578_NK	530	2877	255.09	gi|9295421|gb|AAF86963.1|	131.3	1e-29	ornithine decarboxylase antizyme [Trachemys scripta elegans]
Unigene21363_NK	436	2361	254.471	--	--	--	--
Unigene31490_NK	1277	6911	254.319	gi|327290360|ref|XP_003229891.1|	346.3	2e-93	PREDICTED: transmembrane emp24 domain-containing protein 10-like [Anolis carolinensis]
Unigene6551_NK	1237	6679	253.729	--	--	--	--
Unigene84_NK	356	1919	253.311	--	--	--	--
CL96.Contig2_NK	915	4834	248.264	--	--	--	--
CL1587.Contig1_NK	700	3647	244.831	--	--	--	--
Unigene21814_NK	557	2894	244.159	gi|291399250|ref|XP_002716020.1|	53.1	8e-06	PREDICTED: serine/arginine repetitive matrix 1 isoform 3 [Oryctolagus cuniculus]
Unigene14278_NK	633	3288	244.094	gi|27777661|ref|NP_776251.1|	227.6	3e-58	keratinocyte-associated protein 2 [Homo sapiens] >gi|74751060|sp|Q8N6L1.1|KTAP2_HUMAN RecName: Full=Keratinocyte-associated protein 2; Short=KCP-2 >gi|20987525|gb|AAH29806.1| Keratinocyte associated protein 2 [Homo sapiens]
Unigene6555_NK	1181	6094	242.483	gi|327286771|ref|XP_003228103.1|	465.7	2e-129	PREDICTED: chloride intracellular channel protein 1-like [Anolis carolinensis]
Unigene24733_NK	1615	8282	240.986	gi|440907218|gb|ELR57388.1|	85.9	5e-48	Craniofacial development protein 2 [Bos grunniens mutus]
CL483.Contig1_NK	4196	21367	239.297	gi|301619422|ref|XP_002939094.1|	1176	0	PREDICTED: uncharacterized protein K02A2.6-like [Xenopus (Silurana) tropicalis]
Unigene23452_NK	690	3464	235.916	--	--	--	--
Unigene21556_NK	2227	11116	234.562	--	--	--	--
Unigene24714_NK	649	3236	234.311	gi|327276238|ref|XP_003222877.1|	218	2e-55	PREDICTED: heat shock cognate 71 kDa protein-like [Anolis carolinensis]
CL167.Contig2_NK	571	2846	234.222	gi|327271319|ref|XP_003220435.1|	97.8	3e-19	PREDICTED: UHRF1-binding protein 1-like [Anolis carolinensis]
Unigene733_NK	1734	8616	233.499	gi|270015547|gb|EFA11995.1|	45.8	7e-38	hypothetical protein TcasGA2_TC005145 [Tribolium castaneum]
Unigene31425_NK	2215	10845	230.083	gi|363730908|ref|XP_419144.3|	752.3	0	PREDICTED: structural maintenance of chromosomes flexible hinge domain-containing protein 1 [Gallus gallus]
Unigene25669_NK	3744	18207	228.524	gi|327263321|ref|XP_003216468.1|	1554.7	0	PREDICTED: solute carrier family 12 member 2-like [Anolis carolinensis]
Unigene13798_NK	1358	6589	228.007	gi|465977985|gb|EMP34930.1|	363.6	1e-98	hypothetical protein UY3_07964 [Chelonia mydas]
Unigene6561_NK	420	2015	225.452	gi|327282622|ref|XP_003226041.1|	100.1	3e-20	PREDICTED: 60S acidic ribosomal protein P0-like [Anolis carolinensis]
Unigene22502_NK	332	1589	224.913	--	--	--	--
Unigene14079_NK	1602	7666	224.872	gi|163965364|ref|NP_001106673.1|	406.4	2e-111	nascent polypeptide-associated complex subunit alpha isoform b [Homo sapiens] >gi|356582415|ref|NP_001239186.1| nascent polypeptide-associated complex subunit alpha [Canis lupus familiaris] >gi|356582418|ref|NP_001239187.1| nascent polypeptide-associated complex subunit alpha [Canis lupus familiaris] >gi|71151996|sp|Q13765.1|NACA_HUMAN RecName: Full=Nascent polypeptide-associated complex subunit …
Unigene24402_NK	1696	8107	224.628	gi|327265677|ref|XP_003217634.1|	413.7	1e-113	PREDICTED: transmembrane emp24 domain-containing protein 9-like [Anolis carolinensis]
Unigene31483_NK	1820	8597	221.975	gi|224098392|ref|XP_002199511.1|	766.5	0	PREDICTED: phosphoglycerate kinase-like [Taeniopygia guttata]
Unigene30560_NK	1028	4828	220.7	--	--	--	--
Unigene31484_NK	1469	6899	220.695	gi|326928964|ref|XP_003210642.1|	700.3	0	PREDICTED: actin-related protein 2/3 complex subunit 1B-like [Meleagris gallopavo]
Unigene31504_NK	835	3892	219.036	gi|327273497|ref|XP_003221517.1|	196.1	1e-48	PREDICTED: uncharacterized protein C4orf34 homolog [Anolis carolinensis]
CL50.Contig1_NK	1650	7656	218.045	gi|327276238|ref|XP_003222877.1|	989.2	0	PREDICTED: heat shock cognate 71 kDa protein-like [Anolis carolinensis]
CL2322.Contig2_NK	410	1900	217.77	--	--	--	--
Unigene31227_NK	359	1652	216.244	gi|258677360|gb|ACV87423.1|	155.6	6e-37	MHC class Ia chain [Polyodon spathula]
Unigene21253_NK	1219	5522	212.874	gi|82077272|sp|Q5R2J2.1|G3P_TRISI	627.1	5e-178	RecName: Full=Glyceraldehyde-3-phosphate dehydrogenase; Short=GAPDH; AltName: Full=Peptidyl-cysteine S-nitrosylase GAPDH >gi|56377786|dbj|BAD74117.1| glyceraldehyde-3-phosphate dehydrogenase (GAPDH) homologue [Pelodiscus sinensis]
Unigene28663_NK	2227	9971	210.401	gi|327285737|ref|XP_003227589.1|	73.2	6e-11	PREDICTED: annexin A11-like [Anolis carolinensis]
CL4096.Contig1_NK	1419	6341	209.993	gi|78155535|gb|ABB22797.1|	235	7e-60	MHC class II-associated invariant chain CD74 [Caiman crocodilus]
Unigene30727_NK	1018	4549	209.989	--	--	--	--
Unigene31510_NK	618	2754	209.413	gi|327282644|ref|XP_003226052.1|	151.8	2e-35	PREDICTED: cytochrome c oxidase subunit 6A1, mitochondrial-like [Anolis carolinensis]
Unigene22929_NK	1242	5504	208.25	gi|395512309|ref|XP_003760383.1|	622.1	1e-176	PREDICTED: eukaryotic translation initiation factor 3 subunit H-like [Sarcophilus harrisii]
Unigene31501_NK	895	3962	208.027	gi|296194360|ref|XP_002744918.1|	321.2	4e-86	PREDICTED: transcription factor BTF3-like [Callithrix jacchus]
Unigene28208_NK	3198	14144	207.837	gi|426250598|ref|XP_004019022.1|	1332.8	0	PREDICTED: ATP-binding cassette sub-family F member 1 isoform 1 [Ovis aries]
Unigene31507_NK	1482	6485	205.632	gi|471360356|ref|XP_004370748.1|	830.1	0	PREDICTED: eukaryotic translation initiation factor 3 subunit E [Trichechus manatus latirostris]
Unigene14407_NK	824	3597	205.136	gi|327273843|ref|XP_003221689.1|	357.5	4e-97	PREDICTED: vascular endothelial growth factor C-like [Anolis carolinensis]
Unigene6586_NK	528	2272	202.21	gi|432944299|ref|XP_004083396.1|	75.5	1e-12	PREDICTED: dolichyl-diphosphooligosaccharide--protein glycosyltransferase subunit 4-like [Oryzias latipes]
Unigene6556_NK	1293	5535	201.163	gi|327289640|ref|XP_003229532.1|	289.7	2e-76	PREDICTED: adenine phosphoribosyltransferase-like [Anolis carolinensis]
Unigene31506_NK	850	3626	200.465	gi|327266746|ref|XP_003218165.1|	376.3	9e-103	PREDICTED: MKI67 FHA domain-interacting nucleolar phosphoprotein-like [Anolis carolinensis]
Unigene28460_NK	398	1691	199.659	gi|47211727|emb|CAF92525.1|	52.4	8e-06	unnamed protein product [Tetraodon nigroviridis]
Unigene14253_NK	1941	8221	199.034	gi|291398041|ref|XP_002715636.1|	216.9	3e-54	PREDICTED: extracellular matrix protein 1 isoform 2 [Oryctolagus cuniculus]
CL2051.Contig3_NK	279	1181	198.918	gi|145982754|gb|ABQ01132.1|	147.5	1e-34	carinatease-1 [Tropidechis carinatus]
Unigene266_NK	3513	14841	198.524	gi|390340458|ref|XP_003725249.1|	145.6	1e-32	PREDICTED: uncharacterized protein LOC100892840 [Strongylocentrotus purpuratus]
Unigene24449_NK	1540	6469	197.399	gi|327289788|ref|XP_003229606.1|	601.3	4e-170	PREDICTED: clusterin-like, partial [Anolis carolinensis]
Unigene23279_NK	2117	8886	197.249	gi|327268021|ref|XP_003218797.1|	466.5	2e-129	PREDICTED: lysosome-associated membrane glycoprotein 1-like [Anolis carolinensis]
Unigene31495_NK	610	2555	196.829	gi|359339009|ref|NP_001240705.1|	115.2	2e-24	NADH dehydrogenase [ubiquinone] 1 alpha subcomplex subunit 4 [Callithrix jacchus]
Unigene31499_NK	468	1959	196.706	gi|224081582|ref|XP_002192630.1|	169.9	3e-41	PREDICTED: ATPase inhibitor, mitochondrial [Taeniopygia guttata]
Unigene23130_NK	2471	10329	196.433	gi|465955740|gb|EMP26584.1|	284.6	1e-74	Tapasin [Chelonia mydas]
Unigene23657_NK	1370	5717	196.1	--	--	--	--
Unigene792_NK	311	1291	195.072	gi|301622748|ref|XP_002940691.1|	80.5	2e-14	PREDICTED: hypothetical protein LOC100485130 [Xenopus (Silurana) tropicalis]
Unigene23448_NK	323	1338	194.663	--	--	--	--
CL1347.Contig1_NK	1706	7051	194.223	gi|327292242|ref|XP_003230829.1|	224.9	1e-56	PREDICTED: GTPase IMAP family member 4-like, partial [Anolis carolinensis]
CL1438.Contig2_NK	1848	7634	194.124	gi|327285596|ref|XP_003227519.1|	430.6	1e-118	PREDICTED: signal peptidase complex subunit 2-like [Anolis carolinensis]
Unigene31481_NK	1793	7397	193.867	gi|354481494|ref|XP_003502936.1|	137.5	2e-30	PREDICTED: stress-associated endoplasmic reticulum protein 1-like, partial [Cricetulus griseus]
Unigene24403_NK	1938	7995	193.862	--	--	--	--
Unigene31494_NK	1534	6322	193.668	gi|84370041|ref|NP_001033596.1|	487.6	7e-136	glioma tumor suppressor candidate region gene 2 protein [Bos taurus] >gi|83638565|gb|AAI09970.1| Glioma tumor suppressor candidate region gene 2 [Bos taurus] >gi|296477440|tpg|DAA19555.1| TPA: glioma tumor suppressor candidate region gene 2 [Bos taurus]
CL3457.Contig2_NK	852	3501	193.1	gi|432105586|gb|ELK31780.1|	290.4	7e-77	Claudin-7 [Myotis davidii]
Unigene25177_NK	1374	5643	192.998	--	--	--	--
Unigene13902_NK	328	1347	192.985	--	--	--	--
Unigene13977_NK	546	2241	192.876	gi|345324604|ref|XP_001509053.2|	102.8	8e-21	PREDICTED: interferon alpha-inducible protein 27-like protein 2-like [Ornithorhynchus anatinus]
Unigene30123_NK	356	1450	191.402	--	--	--	--
Unigene6806_NK	513	2084	190.901	gi|327272446|ref|XP_003220996.1|	191.4	1e-47	PREDICTED: galectin-1-like [Anolis carolinensis]
Unigene31498_NK	877	3515	188.345	gi|327290350|ref|XP_003229886.1|	343.6	7e-93	PREDICTED: protein DJ-1-like [Anolis carolinensis]
Unigene13598_NK	2024	8098	188.017	gi|432110945|gb|ELK34419.1|	303.9	2e-80	Phosphatidylinositol-4-phosphate 3-kinase C2 domain-containing subunit alpha [Myotis davidii]
Unigene13809_NK	1482	5884	186.575	gi|327277992|ref|XP_003223747.1|	367.9	8e-100	PREDICTED: nucleolar RNA helicase 2-like [Anolis carolinensis]
Unigene13810_NK	1532	6080	186.498	gi|118092587|ref|XP_001232052.1|	689.1	0	PREDICTED: nucleolar RNA helicase 2 [Gallus gallus]
Unigene31511_NK	840	3332	186.404	gi|348520592|ref|XP_003447811.1|	104.4	7e-21	PREDICTED: interferon alpha-inducible protein 27, mitochondrial-like [Oreochromis niloticus]
Unigene13923_NK	3454	13670	185.984	gi|312837062|ref|NP_001186126.1|	578.2	1e-162	elongation of very long chain fatty acids protein 5 [Gallus gallus] >gi|308212481|gb|ADO21498.1| elongation of very long chain fatty acids family member protein 5 [Gallus gallus]
Unigene29293_NK	322	1257	183.446	--	--	--	--
Unigene6750_NK	996	3880	183.063	gi|134085761|ref|NP_001076835.1|	302.4	2e-80	F11 receptor precursor [Gallus gallus] >gi|118500415|gb|ABK97409.1| junctional adhesion protein A [Gallus gallus]
Unigene6549_NK	2756	10733	183.008	gi|327288158|ref|XP_003228795.1|	763.8	0	PREDICTED: glutamine synthetase-like, partial [Anolis carolinensis]
Unigene827_NK	553	2131	181.087	gi|167521489|ref|XP_001745083.1|	54.3	3e-06	hypothetical protein [Monosiga brevicollis MX1] >gi|163776697|gb|EDQ90316.1| predicted protein [Monosiga brevicollis MX1]
Unigene31502_NK	2573	9892	180.665	gi|327282056|ref|XP_003225760.1|	1420.6	0	PREDICTED: dolichyl-diphosphooligosaccharide--protein glycosyltransferase subunit STT3A-like [Anolis carolinensis]
Unigene30411_NK	2725	10473	180.607	gi|327290579|ref|XP_003230000.1|	413.7	2e-113	PREDICTED: homocysteine-responsive endoplasmic reticulum-resident ubiquitin-like domain member 1 protein-like, partial [Anolis carolinensis]
CL2293.Contig1_NK	247	947	180.17	--	--	--	--
Unigene21220_NK	287	1096	179.456	--	--	--	--
Unigene31523_NK	482	1839	179.293	gi|295792306|gb|ADG29157.1|	114.8	1e-24	mitochondrial ATP synthase subunit f [Epinephelus coioides]
Unigene31522_NK	668	2548	179.247	gi|18000273|gb|AAL54898.1|AF159543_1	196.8	6e-49	transport protein Sec61 beta subunit [Lapemis hardwickii]
Unigene27182_NK	275	1046	178.743	--	--	--	--
Unigene6546_NK	578	2192	178.214	--	--	--	--
Unigene21760_NK	1545	5798	176.351	gi|327265075|ref|XP_003217334.1|	289.7	3e-76	PREDICTED: nucleoside diphosphate kinase-like [Anolis carolinensis]
Unigene6545_NK	2155	8041	175.344	gi|327264451|ref|XP_003217027.1|	471.9	6e-131	PREDICTED: aquaporin-5-like [Anolis carolinensis] >gi|327291067|ref|XP_003230243.1| PREDICTED: aquaporin-5-like [Anolis carolinensis]
Unigene26461_NK	3948	14606	173.853	gi|327285566|ref|XP_003227504.1|	766.9	0	PREDICTED: protein FAM46A-like [Anolis carolinensis]
Unigene29817_NK	3469	12828	173.774	gi|45382795|ref|NP_990827.1|	2086.2	0	Golgi apparatus protein 1 precursor [Gallus gallus] >gi|17376684|sp|Q02391.1|GSLG1_CHICK RecName: Full=Golgi apparatus protein 1; AltName: Full=Cysteine-rich fibroblast growth factor receptor; Flags: Precursor >gi|211776|gb|AAA48769.1| cysteine-rich fibroblast growth factor receptor [Gallus gallus]
Unigene13804_NK	963	3536	172.55	gi|466003435|gb|EMP42095.1|	315.5	2e-84	Complement C1q subcomponent subunit C [Chelonia mydas]
Unigene25670_NK	1043	3816	171.93	--	--	--	--
Unigene6572_NK	3532	12875	171.299	gi|327267458|ref|XP_003218519.1|	816.6	0	PREDICTED: proactivator polypeptide-like [Anolis carolinensis]
Unigene13872_NK	531	1932	170.978	gi|109255000|gb|ABG26998.1|	154.1	2e-36	B-cell translocation gene 1 protein [Sistrurus catenatus edwardsi]
Unigene13835_NK	992	3604	170.727	gi|327270253|ref|XP_003219904.1|	394	5e-108	PREDICTED: peroxiredoxin-6-like [Anolis carolinensis]
Unigene31517_NK	1775	6442	170.55	gi|327274440|ref|XP_003221985.1|	999.6	0	PREDICTED: nucleolar GTP-binding protein 1-like [Anolis carolinensis]
Unigene13937_NK	1460	5287	170.171	--	--	--	--
Unigene21815_NK	568	2053	169.851	gi|345781394|ref|XP_003432129.1|	70.5	5e-11	PREDICTED: transmembrane protein 176B isoform 1 [Canis lupus familiaris]
Unigene29884_NK	320	1152	169.173	--	--	--	--
Unigene13982_NK	2432	8727	168.628	gi|5803225|ref|NP_006752.1|	500.4	1e-139	14-3-3 protein epsilon [Homo sapiens] >gi|27806197|ref|NP_776916.1| 14-3-3 protein epsilon [Bos taurus] >gi|55741616|ref|NP_001006219.1| 14-3-3 protein epsilon [Gallus gallus] >gi|226874906|ref|NP_033562.3| 14-3-3 protein epsilon [Mus musculus] >gi|350539099|ref|NP_001233297.1| 14-3-3 protein epsilon [Pan troglodytes] >gi|51702210|sp|P62258.1|1433E_HUMAN RecName: Full=14-3-3 protein epsilon; Shor…
Unigene29883_NK	968	3459	167.921	--	--	--	--
Unigene6842_NK	915	3261	167.478	gi|354505773|ref|XP_003514942.1|	159.5	2e-37	PREDICTED: group XVI phospholipase A2-like [Cricetulus griseus]
Unigene31556_NK	332	1180	167.022	gi|350537261|ref|NP_001233184.1|	93.6	3e-18	cytochrome c oxidase subunit 7C, mitochondrial [Taeniopygia guttata]
Unigene26_NK	559	1982	166.618	gi|4378025|gb|AAD19348.1|	110.2	5e-23	reverse transcriptase-like protein [Takifugu rubripes]
CL2771.Contig3_NK	672	2381	166.502	gi|327260426|ref|XP_003215035.1|	455.7	8e-127	PREDICTED: tubulin alpha-4A chain-like [Anolis carolinensis]
Unigene31536_NK	568	2000	165.467	--	--	--	--
Unigene31514_NK	528	1855	165.097	--	--	--	--
Unigene28382_NK	1374	4826	165.055	gi|327265727|ref|XP_003217659.1|	595.1	2e-168	PREDICTED: RNA-binding protein 5-like [Anolis carolinensis]
Unigene31519_NK	513	1801	164.978	gi|471355887|ref|XP_004368546.1|	123.6	3e-27	PREDICTED: translation machinery-associated protein 7 [Trichechus manatus latirostris]
Unigene6558_NK	979	3412	163.778	gi|327288737|ref|XP_003229082.1|	334	7e-90	PREDICTED: ubiquitin-fold modifier-conjugating enzyme 1-like [Anolis carolinensis]
Unigene31508_NK	757	2633	163.45	gi|237820703|ref|NP_001013554.2|	246.9	7e-64	receptor accessory protein 6-like [Danio rerio]
Unigene27034_NK	1886	6541	162.979	gi|327279530|ref|XP_003224509.1|	305.1	8e-81	PREDICTED: cold-inducible RNA-binding protein-like [Anolis carolinensis]
CL5404.Contig2_NK	1117	3872	162.896	gi|57524801|ref|NP_001005827.1|	427.2	7e-118	ras-related protein Rab-11A [Gallus gallus] >gi|82233797|sp|Q5ZJN2.1|RB11A_CHICK RecName: Full=Ras-related protein Rab-11A; Flags: Precursor
Unigene6628_NK	579	1996	161.999	gi|238928312|gb|ACR78475.1|	347.8	1e-94	putative GILT [Drysdalia coronoides]
Unigene21854_NK	2138	7369	161.968	gi|327265428|ref|XP_003217510.1|	1104.7	0	PREDICTED: calnexin-like [Anolis carolinensis]
Unigene30746_NK	362	1245	161.618	--	--	--	--
Unigene21891_NK	2135	7328	161.293	gi|327272356|ref|XP_003220951.1|	1225.7	0	PREDICTED: endoplasmin-like [Anolis carolinensis]
Unigene27919_NK	398	1361	160.696	--	--	--	--
CL3166.Contig1_NK	1458	4974	160.316	gi|327272509|ref|XP_003221027.1|	798.9	0	PREDICTED: 60S ribosomal protein L3-like [Anolis carolinensis]
CL2043.Contig1_NK	349	1187	159.828	--	--	--	--
Unigene21816_NK	2849	9680	159.666	gi|327271291|ref|XP_003220421.1|	314.3	2e-83	PREDICTED: protein BTG2-like [Anolis carolinensis]
CL1222.Contig1_NK	302	1022	159.028	--	--	--	--
Unigene14005_NK	639	2161	158.922	--	--	--	--
Unigene26460_NK	2610	8819	158.784	gi|363740363|ref|XP_001233959.2|	320.5	3e-85	PREDICTED: neural proliferation differentiation and control protein 1 [Gallus gallus]
Unigene29057_NK	640	2149	157.792	--	--	--	--
Unigene31512_NK	1992	6686	157.727	gi|17386168|gb|AAL38630.1|AF447708_1	824.3	0	vimentin [Daboia russellii]
Unigene13983_NK	2144	7162	156.978	gi|327279936|ref|XP_003224711.1|	1274.2	0	PREDICTED: signal recognition particle 72 kDa protein-like [Anolis carolinensis]
Unigene14291_NK	730	2418	155.655	gi|327281194|ref|XP_003225334.1|	293.1	8e-78	PREDICTED: dolichyl-diphosphooligosaccharide--protein glycosyltransferase subunit 2-like [Anolis carolinensis]
Unigene30192_NK	902	2987	155.617	--	--	--	--
Unigene25176_NK	222	735	155.583	--	--	--	--
CL66.Contig1_NK	1533	5046	154.68	gi|226372474|gb|ACO51862.1|	200.7	1e-49	Transposable element Tc1 transposase [Rana catesbeiana]
Unigene28910_NK	394	1294	154.336	gi|301619422|ref|XP_002939094.1|	155.2	8e-37	PREDICTED: uncharacterized protein K02A2.6-like [Xenopus (Silurana) tropicalis]
Unigene28400_NK	1362	4466	154.089	gi|449280578|gb|EMC87846.1|	441	6e-122	Cyclin-I, partial [Columba livia]
Unigene31516_NK	978	3202	153.855	gi|444519089|gb|ELV12572.1|	404.8	3e-111	Proteasome subunit beta type-8 [Tupaia chinensis]
Unigene29920_NK	1566	5119	153.611	gi|327288997|ref|XP_003229211.1|	552	3e-155	PREDICTED: calumenin-like [Anolis carolinensis]
Unigene31533_NK	1013	3311	153.595	--	--	--	--
Unigene24110_NK	1492	4865	153.23	--	--	--	--
Unigene31530_NK	947	3087	153.185	gi|327268290|ref|XP_003218931.1|	456.1	1e-126	PREDICTED: peroxiredoxin-4-like [Anolis carolinensis]
CL3206.Contig1_NK	1498	4872	152.835	gi|327285622|ref|XP_003227532.1|	400.6	1e-109	PREDICTED: peptidyl-prolyl cis-trans isomerase B-like [Anolis carolinensis]
Unigene30023_NK	745	2419	152.584	gi|327280955|ref|XP_003225216.1|	297	6e-79	PREDICTED: ETS homologous factor-like [Anolis carolinensis]
CL60.Contig1_NK	340	1099	151.897	--	--	--	--
Unigene6548_NK	1501	4811	150.62	gi|327279492|ref|XP_003224490.1|	647.1	0	PREDICTED: keratin, type I cytoskeletal 18-like [Anolis carolinensis]
Unigene25117_NK	1009	3227	150.292	--	--	--	--
CL3883.Contig1_NK	815	2603	150.088	gi|327276214|ref|XP_003222865.1|	86.7	1e-15	PREDICTED: phospholipase A2 inhibitor subunit gamma B-like [Anolis carolinensis]
Unigene6629_NK	496	1581	149.789	gi|7706326|ref|NP_057131.1|	231.1	1e-59	pre-mRNA branch site protein p14 [Homo sapiens] >gi|13384692|ref|NP_079599.1| pre-mRNA branch site protein p14 [Mus musculus] >gi|50344788|ref|NP_001002067.1| pre-mRNA branch site protein p14 [Danio rerio] >gi|114051091|ref|NP_001039482.1| pre-mRNA branch site protein p14 [Bos taurus] >gi|386781011|ref|NP_001247813.1| pre-mRNA branch site protein p14 [Macaca mulatta] >gi|403420592|ref|NP_00125815…
Unigene6547_NK	1913	6054	148.715	gi|327281791|ref|XP_003225630.1|	548.9	3e-154	PREDICTED: translocon-associated protein subunit alpha-like [Anolis carolinensis]
Unigene29082_NK	768	2429	148.626	gi|449279822|gb|EMC87287.1|	54.7	5e-06	Immunoglobulin G-binding protein A [Columba livia]
Unigene31505_NK	552	1726	146.937	--	--	--	--
Unigene28486_NK	953	2979	146.895	--	--	--	--
CL3586.Contig1_NK	987	3079	146.596	gi|426334036|ref|XP_004028569.1|	370.2	9e-101	PREDICTED: ADP-ribosylation factor 1 isoform 5 [Gorilla gorilla gorilla]
Unigene31528_NK	2644	8234	146.345	gi|465980521|gb|EMP35625.1|	1073.5	0	Dolichyl-diphosphooligosaccharide--protein glycosyltransferase subunit 1 [Chelonia mydas]
Unigene6592_NK	335	1043	146.308	--	--	--	--
Unigene31524_NK	2958	9131	145.06	gi|465966112|gb|EMP30919.1|	714.5	0	Early growth response protein 1 [Chelonia mydas]
Unigene31546_NK	3069	9440	144.545	gi|395833702|ref|XP_003789861.1|	1622.5	0	PREDICTED: staphylococcal nuclease domain-containing protein 1 [Otolemur garnettii]
Unigene20629_NK	552	1686	143.532	--	--	--	--
Unigene6627_NK	484	1475	143.211	gi|238928312|gb|ACR78475.1|	176.8	3e-43	putative GILT [Drysdalia coronoides]
Unigene31539_NK	1001	3033	142.386	--	--	--	--
Unigene23857_NK	256	775	142.263	--	--	--	--
Unigene31542_NK	415	1256	142.223	gi|386782065|ref|NP_001247968.1|	172.6	5e-42	mitochondrial import inner membrane translocase subunit Tim13 [Macaca mulatta] >gi|355702952|gb|EHH29443.1| Mitochondrial import inner membrane translocase subunit Tim13 [Macaca mulatta]
Unigene618_NK	2347	7092	141.999	gi|224070470|ref|XP_002196864.1|	763.5	0	PREDICTED: brain-specific angiogenesis inhibitor 1-associated protein 2-like protein 1 [Taeniopygia guttata]
Unigene31309_NK	1057	3193	141.956	--	--	--	--
Unigene25618_NK	547	1651	141.837	gi|465991600|gb|EMP38645.1|	127.5	3e-28	Interferon-induced transmembrane protein 1 [Chelonia mydas]
Unigene13221_NK	1753	5283	141.621	gi|45382999|ref|NP_989920.1|	219.9	3e-55	DNA-binding protein inhibitor ID-3 [Gallus gallus] >gi|15419003|gb|AAK93835.1| helix-loop-helix protein [Gallus gallus]
Unigene14029_NK	826	2488	141.547	gi|327274226|ref|XP_003221879.1|	201.1	5e-50	PREDICTED: immunoglobulin J chain-like [Anolis carolinensis]
Unigene24508_NK	815	2453	141.439	--	--	--	--
CL2995.Contig1_NK	1613	4848	141.24	gi|301607131|ref|XP_002933173.1|	181.4	1e-43	PREDICTED: hypothetical protein LOC100488659 [Xenopus (Silurana) tropicalis]
Unigene24938_NK	1181	3536	140.699	gi|327276990|ref|XP_003223249.1|	415.2	3e-114	PREDICTED: proliferation-associated protein 2G4-like [Anolis carolinensis]
Unigene25339_NK	936	2794	140.275	--	--	--	--
CL674.Contig3_NK	1009	3008	140.093	gi|327291061|ref|XP_003230240.1|	145.2	4e-33	PREDICTED: GTPase IMAP family member 2-like, partial [Anolis carolinensis]
Unigene6637_NK	864	2567	139.618	gi|363747068|ref|XP_003643901.1|	346.3	1e-93	PREDICTED: LOW QUALITY PROTEIN: transgelin-2-like [Gallus gallus]
Unigene23910_NK	401	1188	139.22	--	--	--	--
CL4520.Contig1_NK	4938	14625	139.179	gi|62078893|ref|NP_001014102.1|	951.8	0	ubiquitin-like modifier-activating enzyme 1 [Rattus norvegicus] >gi|81889667|sp|Q5U300.1|UBA1_RAT RecName: Full=Ubiquitin-like modifier-activating enzyme 1; AltName: Full=Ubiquitin-activating enzyme E1 >gi|55250575|gb|AAH85791.1| Ubiquitin-like modifier activating enzyme 1 [Rattus norvegicus]
Unigene26929_NK	699	2069	139.095	gi|297299881|ref|XP_001099076.2|	164.1	5e-39	PREDICTED: hypothetical protein LOC710457 [Macaca mulatta]
Unigene25698_NK	1213	3578	138.614	gi|406829589|gb|AFS63887.1|	356.3	1e-96	GPX1 [Thamnophis elegans]
Unigene7117_NK	828	2432	138.026	gi|224076514|ref|XP_002198677.1|	214.5	4e-54	PREDICTED: ER membrane protein complex subunit 6 [Taeniopygia guttata]
Unigene14013_NK	2499	7307	137.405	gi|149636850|ref|XP_001509938.1|	197.2	3e-48	PREDICTED: immediate early response gene 2 protein-like [Ornithorhynchus anatinus]
Unigene25103_NK	1164	3401	137.304	gi|327284471|ref|XP_003226961.1|	414.1	7e-114	PREDICTED: eukaryotic translation initiation factor 3 subunit K-like [Anolis carolinensis]
Unigene31559_NK	598	1745	137.127	gi|327286313|ref|XP_003227875.1|	271.6	1e-71	PREDICTED: prefoldin subunit 5-like [Anolis carolinensis]
Unigene21817_NK	318	927	136.988	--	--	--	--
Unigene14004_NK	936	2727	136.911	--	--	--	--
Unigene213_NK	430	1251	136.715	--	--	--	--
Unigene978_NK	372	1080	136.43	gi|55771211|dbj|BAD72127.1|	104	2e-21	reverse transcriptase [Anguilla japonica]
Unigene28205_NK	1076	3123	136.392	--	--	--	--
Unigene26969_NK	1490	4323	136.341	--	--	--	--
CL4145.Contig9_NK	1820	5277	136.252	gi|50752556|ref|XP_422829.1|	350.5	1e-94	PREDICTED: translocon-associated protein subunit gamma [Gallus gallus]
Unigene31411_NK	235	681	136.178	--	--	--	--
Unigene6610_NK	754	2172	135.368	gi|126305837|ref|XP_001363855.1|	362.1	1e-98	PREDICTED: actin-related protein 2/3 complex subunit 3-like [Monodelphis domestica] >gi|334327105|ref|XP_001372889.2| PREDICTED: actin-related protein 2/3 complex subunit 3-like [Monodelphis domestica]
CL2106.Contig1_NK	328	944	135.247	--	--	--	--
Unigene31140_NK	540	1547	134.625	gi|465964540|gb|EMP30378.1|	104.4	2e-21	Protein transport protein Sec31A [Chelonia mydas]
Unigene14173_NK	853	2443	134.587	gi|63146092|gb|AAY33980.1|	344.7	3e-93	cytochrome c oxidase subunit IV [Oxyuranus scutellatus scutellatus]
Unigene21565_NK	1426	4076	134.321	gi|119573509|gb|EAW53124.1|	207.6	1e-51	hCG2040565 [Homo sapiens]
Unigene6624_NK	602	1716	133.952	gi|45384028|ref|NP_990497.1|	156.4	8e-37	protein S100-A11 [Gallus gallus] >gi|2827763|sp|P24479.2|S10AB_CHICK RecName: Full=Protein S100-A11; AltName: Full=Calgizzarin; AltName: Full=S100 calcium-binding protein A11 >gi|1684841|gb|AAB36542.1| calgizzarin [Gallus gallus]
Unigene29940_NK	252	717	133.705	gi|50812362|gb|AAT81393.1|	101.3	1e-20	MHC class I heavy chain [Anser anser]
Unigene25668_NK	685	1948	133.637	gi|334359125|pdb|3AV2|A	266.5	7e-70	Chain A, The Human Nucleosome Structure Containing The Histone Variant H3.3 >gi|334359129|pdb|3AV2|E Chain E, The Human Nucleosome Structure Containing The Histone Variant H3.3
Unigene21615_NK	852	2406	132.704	gi|327264387|ref|XP_003216995.1|	308.1	3e-82	PREDICTED: myosin light polypeptide 6-like isoform 2 [Anolis carolinensis]
CL3786.Contig1_NK	551	1554	132.534	--	--	--	--
CL1433.Contig2_NK	1835	5164	132.245	gi|345328363|ref|XP_001510356.2|	633.3	1e-179	PREDICTED: liver carboxylesterase 1-like [Ornithorhynchus anatinus]
Unigene31381_NK	274	770	132.059	--	--	--	--
Unigene31525_NK	745	2091	131.894	gi|449280799|gb|EMC88025.1|	280.4	5e-74	Lysozyme g, partial [Columba livia]
Unigene29718_NK	2580	7239	131.852	gi|326916753|ref|XP_003204669.1|	629.4	2e-178	PREDICTED: cathepsin B-like [Meleagris gallopavo]
Unigene26832_NK	1929	5398	131.501	gi|327262002|ref|XP_003215815.1|	433.7	1e-119	PREDICTED: ezrin-like [Anolis carolinensis]
Unigene21829_NK	1515	4233	131.3	gi|327260310|ref|XP_003214977.1|	602.8	1e-170	PREDICTED: actin-related protein 2/3 complex subunit 2-like [Anolis carolinensis]
CL5530.Contig1_NK	1058	2953	131.162	gi|432957528|ref|XP_004085839.1|	208.4	5e-52	PREDICTED: uncharacterized protein LOC101169091 [Oryzias latipes]
Unigene18773_NK	1788	4931	129.597	gi|4759160|ref|NP_004166.1|	252.3	6e-65	small nuclear ribonucleoprotein Sm D3 [Homo sapiens] >gi|13385598|ref|NP_080371.1| small nuclear ribonucleoprotein Sm D3 [Mus musculus] >gi|56119060|ref|NP_001007839.1| small nuclear ribonucleoprotein Sm D3 [Gallus gallus] >gi|62859245|ref|NP_001017093.1| small nuclear ribonucleoprotein D3 polypeptide 18kDa [Xenopus (Silurana) tropicalis] >gi|148230601|ref|NP_001084936.1| small nuclear ribonucleo…
Unigene23542_NK	328	900	128.943	--	--	--	--
Unigene22147_NK	1083	2969	128.828	gi|119617872|gb|EAW97466.1|	52	2e-57	B-cell translocation gene 1, anti-proliferative, isoform CRA_a [Homo sapiens]
Unigene14133_NK	590	1617	128.791	gi|327281621|ref|XP_003225545.1|	89	1e-16	PREDICTED: nucleolin-like [Anolis carolinensis]
Unigene25678_NK	2135	5836	128.454	gi|327286717|ref|XP_003228076.1|	592	4e-167	PREDICTED: alpha-soluble NSF attachment protein-like [Anolis carolinensis]
Unigene24065_NK	3456	9391	127.693	gi|327279416|ref|XP_003224452.1|	714.5	0	PREDICTED: LOW QUALITY PROTEIN: forkhead box protein C1-like [Anolis carolinensis]
Unigene22511_NK	1488	4043	127.682	gi|45382667|ref|NP_990035.1|	278.1	8e-73	transforming protein RhoA [Gallus gallus] >gi|3184514|gb|AAC18962.1| GTPase cRhoA [Gallus gallus] >gi|4218981|gb|AAD12255.1| GTP-binding protein [Gallus gallus] >gi|10178874|emb|CAC08447.1| RhoA GTPase [Gallus gallus] >gi|217874317|gb|ACK56277.1| RhoA GTPase [Anas platyrhynchos]
Unigene23119_NK	1875	5092	127.619	gi|71896843|ref|NP_001026174.1|	198	1e-48	death-associated protein 1 [Gallus gallus] >gi|380846555|gb|AFE84782.1| death associated protein 1 [Gallus gallus] >gi|380846557|gb|AFE84783.1| death associated protein 1 [Meleagris gallopavo]
Unigene21530_NK	1685	4574	127.563	gi|465998301|gb|EMP40604.1|	401.4	7e-110	GTP-binding protein SAR1a [Chelonia mydas]
Unigene31535_NK	1046	2835	127.365	gi|334359125|pdb|3AV2|A	265.4	3e-69	Chain A, The Human Nucleosome Structure Containing The Histone Variant H3.3 >gi|334359129|pdb|3AV2|E Chain E, The Human Nucleosome Structure Containing The Histone Variant H3.3
Unigene20939_NK	230	623	127.288	gi|327264291|ref|XP_003216947.1|	128.3	1e-28	PREDICTED: n-alpha-acetyltransferase 10, NatA catalytic subunit-like [Anolis carolinensis]
Unigene6945_NK	1611	4321	126.043	gi|466003424|gb|EMP42084.1|	788.1	0	Dolichyl-diphosphooligosaccharide--protein glycosyltransferase 48 kDa subunit [Chelonia mydas]
Unigene31496_NK	854	2285	125.735	--	--	--	--
Unigene6588_NK	385	1026	125.232	gi|224057620|ref|XP_002187197.1|	129.4	5e-29	PREDICTED: guanine nucleotide-binding protein G(I)/G(S)/G(O) subunit gamma-5 [Taeniopygia guttata]
Unigene31534_NK	578	1537	124.961	gi|327289776|ref|XP_003229600.1|	228.8	1e-58	PREDICTED: dolichyl-diphosphooligosaccharide--protein glycosyltransferase subunit DAD1-like [Anolis carolinensis]
Unigene7232_NK	3512	9319	124.694	gi|54020693|ref|NP_989562.2|	583.6	2e-164	ADP/ATP translocase 3 [Gallus gallus]
Unigene31563_NK	524	1390	124.656	gi|355779857|gb|EHH64333.1|	68.2	2e-10	hypothetical protein EGM_17517 [Macaca fascicularis]
Unigene25441_NK	1737	4606	124.61	gi|327281621|ref|XP_003225545.1|	704.9	0	PREDICTED: nucleolin-like [Anolis carolinensis]
Unigene14231_NK	764	2022	124.37	gi|327273710|ref|XP_003221623.1|	303.1	8e-81	PREDICTED: transmembrane protein 165-like [Anolis carolinensis]
Unigene23619_NK	1843	4869	124.149	gi|57529439|ref|NP_001006303.1|	906.7	0	6-phosphogluconate dehydrogenase, decarboxylating [Gallus gallus]
Unigene31513_NK	862	2269	123.696	gi|327285688|ref|XP_003227565.1|	219.2	2e-55	PREDICTED: cytochrome c oxidase subunit 5A, mitochondrial-like [Anolis carolinensis]
Unigene26833_NK	1480	3888	123.451	gi|315113883|ref|NP_001186694.1|	271.6	7e-71	15 kDa selenoprotein precursor [Taeniopygia guttata]
Unigene79_NK	951	2486	122.843	gi|466000802|gb|EMP41349.1|	219.2	2e-55	Immunoglobulin lambda-like polypeptide 5 [Chelonia mydas]
Unigene21273_NK	1074	2803	122.644	gi|327289596|ref|XP_003229510.1|	265.4	3e-69	PREDICTED: selenoprotein S-like [Anolis carolinensis]
Unigene14275_NK	1212	3162	122.599	gi|327277368|ref|XP_003223437.1|	638.6	0	PREDICTED: fibronectin type-III domain-containing protein 3a-like, partial [Anolis carolinensis]
Unigene25579_NK	2714	7053	122.122	gi|327284271|ref|XP_003226862.1|	976.5	0	PREDICTED: proline dehydrogenase, mitochondrial-like [Anolis carolinensis]
CL861.Contig1_NK	1236	3209	122.006	gi|82232159|sp|Q5MCS0.1|VSPHA_LAPHA	464.2	6e-129	RecName: Full=Serine protease harobin; AltName: Full=Fibrin(ogen)olytic enzyme; AltName: Full=Snake venom serine protease; Short=SVSP; Flags: Precursor >gi|56566179|gb|AAV98367.1| serine protease precursor [Lapemis hardwickii]
Unigene13585_NK	210	545	121.957	gi|432865271|ref|XP_004070501.1|	58.9	8e-08	PREDICTED: ADP-ribosylation factor 3-like [Oryzias latipes]
Unigene22197_NK	469	1216	121.84	gi|4506717|ref|NP_001023.1|	127.5	1e-28	40S ribosomal protein S29 isoform 1 [Homo sapiens] >gi|6677803|ref|NP_033119.1| 40S ribosomal protein S29 [Mus musculus] >gi|6981490|ref|NP_037008.1| 40S ribosomal protein S29 [Rattus norvegicus] >gi|27807381|ref|NP_777229.1| 40S ribosomal protein S29 [Bos taurus] >gi|62857725|ref|NP_001016766.1| ribosomal protein S29 [Xenopus (Silurana) tropicalis] >gi|197098290|ref|NP_001127434.1| 40S ribosomal…
Unigene31552_NK	1424	3691	121.804	gi|224071710|ref|XP_002197338.1|	369	3e-100	PREDICTED: glycolipid transfer protein [Taeniopygia guttata]
Unigene22334_NK	702	1817	121.632	--	--	--	--
Unigene31520_NK	741	1916	121.508	gi|327291950|ref|XP_003230683.1|	97.8	5e-19	PREDICTED: apolipoprotein C-I, basic form-like [Anolis carolinensis]
Unigene31532_NK	2144	5539	121.405	gi|326930769|ref|XP_003211514.1|	382.9	3e-104	PREDICTED: rho GDP-dissociation inhibitor 1-like [Meleagris gallopavo]
CL5619.Contig1_NK	1400	3611	121.207	gi|327261951|ref|XP_003215790.1|	204.1	1e-50	PREDICTED: proteolipid protein 2-like [Anolis carolinensis]
Unigene28428_NK	678	1745	120.947	--	--	--	--
Unigene28801_NK	2774	7135	120.869	gi|327282966|ref|XP_003226213.1|	758.8	0	PREDICTED: Golgi reassembly-stacking protein 2-like [Anolis carolinensis]
Unigene31553_NK	1137	2919	120.643	gi|327280876|ref|XP_003225177.1|	371.7	3e-101	PREDICTED: endoplasmic reticulum resident protein 29-like [Anolis carolinensis]
Unigene24936_NK	841	2159	120.638	gi|327276990|ref|XP_003223249.1|	348.2	2e-94	PREDICTED: proliferation-associated protein 2G4-like [Anolis carolinensis]
Unigene22122_NK	247	633	120.43	gi|327275183|ref|XP_003222353.1|	158.7	7e-38	PREDICTED: endoplasmic reticulum resident protein 44-like [Anolis carolinensis]
Unigene13858_NK	959	2457	120.397	--	--	--	--
Unigene6617_NK	743	1902	120.296	gi|327283486|ref|XP_003226472.1|	250.8	4e-65	PREDICTED: ATP synthase lipid-binding protein, mitochondrial-like [Anolis carolinensis]
Unigene26458_NK	1344	3432	119.999	--	--	--	--
Unigene31548_NK	1082	2759	119.827	gi|327280512|ref|XP_003224996.1|	271.9	3e-71	PREDICTED: alpha-crystallin B chain-like [Anolis carolinensis]
Unigene31417_NK	406	1035	119.796	--	--	--	--
Unigene31531_NK	2055	5237	119.757	gi|327265069|ref|XP_003217331.1|	640.2	0	PREDICTED: protein Tob1-like [Anolis carolinensis]
CL2459.Contig2_NK	623	1586	119.631	--	--	--	--
Unigene23986_NK	763	1942	119.606	--	--	--	--
Unigene29752_NK	1024	2604	119.501	gi|348572492|ref|XP_003472026.1|	627.1	4e-178	PREDICTED: 26S proteasome non-ATPase regulatory subunit 7-like [Cavia porcellus]
Unigene31537_NK	1698	4313	119.363	gi|327283396|ref|XP_003226427.1|	496.5	1e-138	PREDICTED: tetraspanin-3-like isoform 1 [Anolis carolinensis]
Unigene30883_NK	747	1893	119.085	--	--	--	--
Unigene7216_NK	513	1299	118.993	gi|327260906|ref|XP_003215274.1|	243.8	2e-63	PREDICTED: nuclear nucleic acid-binding protein C1D-like [Anolis carolinensis]
Unigene828_NK	857	2166	118.77	gi|327286244|ref|XP_003227841.1|	83.2	1e-14	PREDICTED: integral membrane protein 2A-like [Anolis carolinensis]
CL3249.Contig1_NK	338	854	118.733	--	--	--	--
Unigene31554_NK	701	1764	118.252	gi|327290010|ref|XP_003229717.1|	194.9	2e-48	PREDICTED: protein S100-A10-like isoform 1 [Anolis carolinensis] >gi|327290012|ref|XP_003229718.1| PREDICTED: protein S100-A10-like isoform 2 [Anolis carolinensis] >gi|327290014|ref|XP_003229719.1| PREDICTED: protein S100-A10-like isoform 3 [Anolis carolinensis]
CL5424.Contig21_NK	1565	3925	117.857	gi|408816336|dbj|BAM62877.1|	565.5	2e-159	L1-encoded reverse transcriptase-like protein [Trimeresurus flavoviridis]
Unigene14406_NK	2029	5078	117.609	gi|327273843|ref|XP_003221689.1|	453	2e-125	PREDICTED: vascular endothelial growth factor C-like [Anolis carolinensis]
Unigene28450_NK	1036	2589	117.436	--	--	--	--
Unigene8444_NK	1654	4125	117.197	gi|465959269|gb|EMP28344.1|	283.9	1e-74	Endothelial differentiation-related factor 1 like protein [Chelonia mydas]
Unigene13616_NK	737	1838	117.194	gi|397502369|ref|XP_003821833.1|	394.4	2e-108	PREDICTED: 14-3-3 protein zeta/delta [Pan paniscus]
Unigene27235_NK	325	810	117.12	--	--	--	--
Unigene7551_NK	1493	3719	117.056	gi|126297808|ref|XP_001368358.1|	275	7e-72	PREDICTED: immediate early response gene 5-like protein-like [Monodelphis domestica]
Unigene14193_NK	901	2237	116.673	--	--	--	--
Unigene31561_NK	1419	3518	116.504	gi|224049534|ref|XP_002197094.1|	297.7	9e-79	PREDICTED: oligosaccharyltransferase complex subunit OSTC [Taeniopygia guttata]
Unigene27179_NK	900	2223	116.072	--	--	--	--
Unigene28487_NK	603	1489	116.04	gi|348518187|ref|XP_003446613.1|	361.7	1e-98	PREDICTED: tubulin alpha-1C chain-like [Oreochromis niloticus]
Unigene22241_NK	910	2245	115.932	gi|390479600|ref|XP_002762751.2|	299.7	1e-79	PREDICTED: eukaryotic translation initiation factor 1A, X-chromosomal-like [Callithrix jacchus]
CL3939.Contig11_NK	1575	3878	115.706	gi|188501719|gb|ACD54828.1|	414.5	8e-114	MHC class I antigen [Amblyrhynchus cristatus]
CL4576.Contig1_NK	1515	3727	115.605	gi|317412168|sp|D9IX97.1|VNP_NAJAT	66.6	4e-09	RecName: Full=Natriuretic peptide Na-NP; Flags: Precursor >gi|300430031|gb|ADK12001.1| natriuretic peptide [Naja atra]
Unigene29539_NK	1077	2645	115.409	gi|465954486|gb|EMP25925.1|	70.9	1e-10	Cytosolic acyl coenzyme A thioester hydrolase [Chelonia mydas]
Unigene31419_NK	311	763	115.29	--	--	--	--
Unigene30546_NK	720	1766	115.262	--	--	--	--
Unigene31567_NK	612	1499	115.101	--	--	--	--
CL2997.Contig2_NK	2916	7139	115.048	gi|327262169|ref|XP_003215898.1|	859.8	0	PREDICTED: LOW QUALITY PROTEIN: ERO1-like protein beta-like [Anolis carolinensis]
Unigene23964_NK	1475	3599	114.662	gi|327272772|ref|XP_003221158.1|	678.3	0	PREDICTED: phosphate carrier protein, mitochondrial-like isoform 1 [Anolis carolinensis]
Unigene25655_NK	782	1908	114.657	gi|327276297|ref|XP_003222906.1|	269.2	1e-70	PREDICTED: intermediate conductance calcium-activated potassium channel protein 4-like [Anolis carolinensis]
Unigene26464_NK	4238	10315	114.377	gi|326935892|ref|XP_003213999.1|	2441.8	0	PREDICTED: coatomer subunit alpha-like [Meleagris gallopavo]
Unigene28102_NK	753	1827	114.018	gi|124231|sp|P10160.2|IF5A1_RABIT	308.5	2e-82	RecName: Full=Eukaryotic translation initiation factor 5A-1; Short=eIF-5A-1; Short=eIF-5A1; AltName: Full=Eukaryotic initiation factor 5A isoform 1; Short=eIF-5A; AltName: Full=eIF-4D
Unigene28521_NK	1101	2669	113.917	gi|515694|gb|AAA49112.1|	436.4	1e-120	tropomyosin [Gallus gallus]
Unigene14092_NK	574	1389	113.715	gi|327278711|ref|XP_003224104.1|	149.8	6e-35	PREDICTED: cystatin-B-like [Anolis carolinensis]
CL859.Contig1_NK	2856	6911	113.713	gi|14285211|gb|AAK58879.1|AF355375_1	402.1	8e-110	putative reverse transcriptase [Takifugu rubripes]
Unigene31500_NK	1453	3508	113.455	gi|327266936|ref|XP_003218259.1|	181.4	1e-43	PREDICTED: retinoic acid receptor responder protein 1-like [Anolis carolinensis]
Unigene31573_NK	1062	2563	113.41	gi|126277482|ref|XP_001369563.1|	354	7e-96	PREDICTED: proteasome activator complex subunit 2-like [Monodelphis domestica]
Unigene14001_NK	632	1525	113.392	gi|465977050|gb|EMP34604.1|	114	5e-24	Gelsolin [Chelonia mydas]
CL4110.Contig5_NK	299	721	113.317	--	--	--	--
Unigene24529_NK	4259	10264	113.25	gi|327274118|ref|XP_003221825.1|	1718	0	PREDICTED: protein transport protein Sec24D-like [Anolis carolinensis]
CL3401.Contig2_NK	1181	2844	113.164	--	--	--	--
Unigene30717_NK	1224	2943	112.989	--	--	--	--
Unigene18823_NK	583	1401	112.927	gi|449492287|ref|XP_004175562.1|	139.8	7e-32	PREDICTED: protein transport protein Sec61 subunit gamma isoform 2 [Taeniopygia guttata]
Unigene15063_NK	343	824	112.892	gi|327280914|ref|XP_003225196.1|	97.1	2e-19	PREDICTED: stromal cell-derived factor 2-like protein 1-like [Anolis carolinensis]
Unigene31558_NK	612	1470	112.874	--	--	--	--
Unigene30747_NK	891	2139	112.814	--	--	--	--
Unigene23480_NK	347	833	112.809	--	--	--	--
Unigene26909_NK	2083	4995	112.687	gi|327276391|ref|XP_003222953.1|	574.7	6e-162	PREDICTED: transforming growth factor beta-1-like [Anolis carolinensis]
Unigene14211_NK	1509	3617	112.639	gi|50801766|ref|XP_424186.1|	125.2	9e-27	PREDICTED: uncharacterized protein LOC426548 [Gallus gallus]
Unigene6623_NK	964	2309	112.558	gi|327272742|ref|XP_003221143.1|	362.5	1e-98	PREDICTED: ADP-ribosylation factor-like protein 1-like [Anolis carolinensis]
Unigene15035_NK	274	655	112.336	--	--	--	--
Unigene6599_NK	843	2013	112.213	gi|20067631|emb|CAC83780.1|	315.8	1e-84	phosphoglucose isomerase [Boiga kraepelini]
Unigene31518_NK	1212	2890	112.053	gi|330376140|gb|AEC13302.1|	492.7	1e-137	cathepsin H [Gallus gallus]
Unigene13584_NK	640	1525	111.974	gi|431901379|gb|ELK08405.1|	321.6	1e-86	Protein Wnt-10b [Pteropus alecto]
Unigene31549_NK	1449	3442	111.627	gi|327285388|ref|XP_003227416.1|	172.2	6e-41	PREDICTED: SH3 domain-binding glutamic acid-rich-like protein 3-like [Anolis carolinensis]
Unigene22298_NK	1708	4053	111.511	gi|239977113|sp|Q5ZKE5.2|CAB45_CHICK	681.8	0	RecName: Full=45 kDa calcium-binding protein; Short=Cab45; AltName: Full=Stromal cell-derived factor 4; Short=SDF-4; Flags: Precursor
Unigene31582_NK	1180	2800	111.508	gi|327291259|ref|XP_003230339.1|	417.9	5e-115	PREDICTED: complement component 1 Q subcomponent-binding protein, mitochondrial-like [Anolis carolinensis]
Unigene31585_NK	599	1421	111.48	gi|127377|sp|P15786.1|MT1_COLLI	136	1e-30	RecName: Full=Metallothionein-1; Short=MT-1; AltName: Full=Metallothionein-I; Short=MT-I >gi|449282556|gb|EMC89389.1| Metallothionein-1 [Columba livia]
Unigene27918_NK	642	1522	111.406	--	--	--	--
Unigene15006_NK	239	566	111.288	--	--	--	--
Unigene20782_NK	1992	4704	110.97	gi|327291105|ref|XP_003230262.1|	1008.4	0	PREDICTED: t-complex protein 1 subunit gamma-like isoform 1 [Anolis carolinensis]
CL4574.Contig4_NK	2489	5865	110.732	gi|327266654|ref|XP_003218119.1|	916.8	0	PREDICTED: complement C4-B-like, partial [Anolis carolinensis]
Unigene27462_NK	1376	3240	110.651	gi|344292808|ref|XP_003418117.1|	242.7	3e-62	PREDICTED: microtubule-associated proteins 1A/1B light chain 3B-like [Loxodonta africana] >gi|471380010|ref|XP_004377801.1| PREDICTED: microtubule-associated proteins 1A/1B light chain 3B [Trichechus manatus latirostris]
Unigene23757_NK	544	1280	110.571	gi|395831250|ref|XP_003788718.1|	256.9	3e-67	PREDICTED: lipid phosphate phosphohydrolase 2 [Otolemur garnettii]
Unigene21337_NK	1886	4426	110.281	gi|327288100|ref|XP_003228766.1|	256.5	3e-66	PREDICTED: MARCKS-related protein-like [Anolis carolinensis]
Unigene23805_NK	1011	2372	110.254	gi|71895411|ref|NP_001025768.1|	637.9	0	coatomer subunit gamma [Gallus gallus]
CL66.Contig5_NK	222	520	110.073	--	--	--	--
Unigene6621_NK	600	1405	110.041	gi|327291203|ref|XP_003230311.1|	219.2	1e-55	PREDICTED: probable ribosome biogenesis protein RLP24-like [Anolis carolinensis]
Unigene22647_NK	1988	4651	109.941	gi|465993186|gb|EMP39130.1|	58.5	1e-06	H/ACA ribonucleoprotein complex subunit 4 [Chelonia mydas]
CL4241.Contig1_NK	1482	3456	109.586	gi|327291792|ref|XP_003230604.1|	183.7	2e-44	PREDICTED: vesicle-associated membrane protein 8-like, partial [Anolis carolinensis]
Unigene21032_NK	1732	4038	109.559	gi|327272420|ref|XP_003220983.1|	1081.6	0	PREDICTED: eukaryotic translation initiation factor 3 subunit D-like [Anolis carolinensis]
Unigene29882_NK	729	1696	109.327	--	--	--	--
Unigene13725_NK	542	1256	108.898	gi|334346923|ref|XP_001375285.2|	180.3	3e-44	PREDICTED: vesicle-associated membrane protein 3-like [Monodelphis domestica]
Unigene13580_NK	707	1638	108.874	gi|327277964|ref|XP_003223733.1|	139	1e-31	PREDICTED: serglycin-like [Anolis carolinensis]
Unigene6557_NK	1247	2889	108.87	gi|327269412|ref|XP_003219488.1|	413.3	1e-113	PREDICTED: receptor-binding cancer antigen expressed on SiSo cells-like [Anolis carolinensis]
Unigene31583_NK	1024	2369	108.716	gi|440898087|gb|ELR49658.1|	335.1	3e-90	Proteasome activator complex subunit 1 [Bos grunniens mutus]
Unigene31526_NK	3565	8225	108.419	gi|327290559|ref|XP_003229990.1|	1448.3	0	PREDICTED: hypoxia up-regulated protein 1-like [Anolis carolinensis]
Unigene11957_NK	579	1334	108.269	gi|327265190|ref|XP_003217391.1|	161.8	1e-38	PREDICTED: v-type proton ATPase subunit e 1-like [Anolis carolinensis]
Unigene13900_NK	2060	4734	107.992	gi|63146078|gb|AAY33973.1|	1239.6	0	HSP70 [Oxyuranus scutellatus scutellatus]
Unigene31529_NK	3587	8227	107.78	gi|327272151|ref|XP_003220849.1|	716.8	0	PREDICTED: adiponectin receptor protein 2-like [Anolis carolinensis]
Unigene20318_NK	814	1862	107.494	gi|126165282|ref|NP_001075177.1|	214.2	6e-54	transcription initiation factor IIA subunit 2 [Gallus gallus] >gi|121308871|dbj|BAF43532.1| general transcription facter IIA subunit 2 [Gallus gallus]
CL3709.Contig1_NK	783	1791	107.489	--	--	--	--
CL1435.Contig1_NK	1435	3271	107.117	gi|403309917|gb|AFR33843.1|	706.8	0	immunoglobulin Y2 heavy chain constant region, partial [Orthriophis taeniurus]
Unigene30417_NK	2699	6146	107.009	gi|50758178|ref|XP_415797.1|	479.2	5e-133	PREDICTED: UPF0458 protein C7orf42 [Gallus gallus]
Unigene31560_NK	1163	2647	106.956	gi|444732430|gb|ELW72725.1|	70.9	1e-10	hypothetical protein TREES_T100011369 [Tupaia chinensis]
Unigene275_NK	700	1593	106.942	gi|300218775|gb|ADJ80991.1|	66.6	2e-39	CR1-3 [Lycodichthys dearborni]
CL841.Contig2_NK	2011	4568	106.744	gi|62858913|ref|NP_001017087.1|	423.3	2e-116	tropomyosin 3, gamma [Xenopus (Silurana) tropicalis] >gi|89266911|emb|CAJ82227.1| tropomyosin 4 [Xenopus (Silurana) tropicalis] >gi|134023769|gb|AAI35408.1| tpm3 protein [Xenopus (Silurana) tropicalis]
Unigene24146_NK	695	1578	106.697	gi|449276664|gb|EMC85096.1|	361.3	2e-98	Ras-related protein Rab-7a [Columba livia]
Unigene31545_NK	2012	4567	106.668	gi|327259463|ref|XP_003214556.1|	1028.8	0	PREDICTED: ATP synthase subunit alpha, mitochondrial-like [Anolis carolinensis]
CL3800.Contig2_NK	660	1497	106.588	--	--	--	--
Unigene30758_NK	1015	2301	106.532	--	--	--	--
Unigene31568_NK	881	1995	106.413	gi|45382479|ref|NP_990696.1|	383.6	6e-105	glutathione S-transferase theta-1 [Gallus gallus] >gi|1170112|sp|P20135.3|GSTT1_CHICK RecName: Full=Glutathione S-transferase theta-1; AltName: Full=GST class-theta; AltName: Full=GST-CL1 >gi|533139|gb|AAA91968.1| theta glutathione-S-transferase [Gallus gallus]
Unigene28151_NK	1166	2637	106.277	gi|327259210|ref|XP_003214431.1|	234.6	7e-60	PREDICTED: epididymal secretory protein E1-like [Anolis carolinensis]
CL1983.Contig1_NK	265	599	106.221	gi|382934478|gb|AFG31713.1|	110.2	3e-23	MHC class II antigen DR beta chain, partial [Saccopteryx bilineata]
Unigene29545_NK	1459	3290	105.967	--	--	--	--
Unigene14209_NK	1406	3165	105.783	--	--	--	--
Unigene31557_NK	754	1697	105.764	gi|327275596|ref|XP_003222559.1|	402.1	1e-110	PREDICTED: proteasome subunit beta type-3-like [Anolis carolinensis]
CL2484.Contig1_NK	340	765	105.733	--	--	--	--
Unigene14276_NK	3219	7237	105.649	gi|327277368|ref|XP_003223437.1|	243.4	5e-62	PREDICTED: fibronectin type-III domain-containing protein 3a-like, partial [Anolis carolinensis]
Unigene27970_NK	4270	9598	105.629	gi|363739019|ref|XP_001233249.2|	567.4	2e-159	PREDICTED: sequestosome-1 isoform 1 [Gallus gallus]
Unigene21403_NK	2157	4843	105.51	gi|327264528|ref|XP_003217065.1|	330.9	1e-88	PREDICTED: prostaglandin E synthase 3-like [Anolis carolinensis]
CL5518.Contig3_NK	616	1381	105.352	gi|432950267|ref|XP_004084454.1|	43.9	1e-26	PREDICTED: uncharacterized protein LOC101164452 [Oryzias latipes]
Unigene14099_NK	436	977	105.302	gi|327288644|ref|XP_003229036.1|	93.6	3e-18	PREDICTED: ATP synthase subunit epsilon, mitochondrial-like [Anolis carolinensis]
Unigene8707_NK	698	1561	105.094	gi|348568742|ref|XP_003470157.1|	353.6	4e-96	PREDICTED: malate dehydrogenase, mitochondrial [Cavia porcellus]
Unigene28265_NK	471	1052	104.96	--	--	--	--
Unigene27177_NK	1305	2910	104.788	gi|327266482|ref|XP_003218034.1|	283.5	1e-74	PREDICTED: spliceosome RNA helicase BAT1-like [Anolis carolinensis]
Unigene31527_NK	978	2171	104.316	gi|224073935|ref|XP_002191642.1|	472.2	1e-131	PREDICTED: proteasome subunit beta type-7 [Taeniopygia guttata]
Unigene20963_NK	1721	3813	104.115	gi|327276633|ref|XP_003223072.1|	351.7	7e-95	PREDICTED: receptor expression-enhancing protein 5-like [Anolis carolinensis]
Unigene30393_NK	234	518	104.026	--	--	--	--
Unigene24561_NK	490	1083	103.863	gi|465974111|gb|EMP33659.1|	305.4	6e-82	Transmembrane protein 39A [Chelonia mydas]
CL2277.Contig1_NK	3569	7884	103.808	gi|327284215|ref|XP_003226834.1|	1959.9	0	PREDICTED: sodium/potassium-transporting ATPase subunit alpha-1-like [Anolis carolinensis]
Unigene31571_NK	1394	3077	103.727	gi|327260832|ref|XP_003215237.1|	507.3	7e-142	PREDICTED: malate dehydrogenase, cytoplasmic-like [Anolis carolinensis]
Unigene23698_NK	1121	2473	103.669	--	--	--	--
Unigene23966_NK	908	2002	103.611	gi|432915657|ref|XP_004079196.1|	299.3	1e-79	PREDICTED: ras-related protein Rab-2A-like [Oryzias latipes]
Unigene6618_NK	1451	3196	103.507	gi|344287504|ref|XP_003415493.1|	662.1	0	PREDICTED: serine/arginine-rich splicing factor 4-like [Loxodonta africana]
CL37.Contig1_NK	360	792	103.384	--	--	--	--
Unigene31547_NK	2761	6064	103.21	gi|327278086|ref|XP_003223793.1|	1029.6	0	PREDICTED: complement C1s subcomponent-like [Anolis carolinensis]
Unigene28475_NK	2562	5617	103.028	gi|327267857|ref|XP_003218715.1|	864	0	PREDICTED: dnaJ homolog subfamily C member 3-like [Anolis carolinensis]
Unigene17172_NK	2808	6154	102.989	gi|224061765|ref|XP_002195695.1|	539.3	4e-151	PREDICTED: secretory carrier-associated membrane protein 2 [Taeniopygia guttata]
Unigene31540_NK	989	2167	102.965	gi|71896361|ref|NP_001026105.1|	382.9	1e-104	acidic leucine-rich nuclear phosphoprotein 32 family member B [Gallus gallus] >gi|82233971|sp|Q5ZMN0.1|AN32B_CHICK RecName: Full=Acidic leucine-rich nuclear phosphoprotein 32 family member B
Unigene6626_NK	264	577	102.707	--	--	--	--
Unigene25036_NK	2563	5598	102.639	gi|327279376|ref|XP_003224432.1|	602.4	3e-170	PREDICTED: multiple inositol polyphosphate phosphatase 1-like [Anolis carolinensis]
CL5039.Contig1_NK	4063	8860	102.475	gi|327290024|ref|XP_003229724.1|	1733	0	PREDICTED: structural maintenance of chromosomes flexible hinge domain-containing protein 1-like, partial [Anolis carolinensis]
Unigene30689_NK	771	1681	102.457	--	--	--	--
Unigene8822_NK	1328	2890	102.265	gi|327281075|ref|XP_003225275.1|	388.3	5e-106	PREDICTED: claudin-4-like [Anolis carolinensis]
Unigene7494_NK	1378	2998	102.238	gi|327284876|ref|XP_003227161.1|	173.7	2e-41	PREDICTED: hypothetical protein LOC100567022 [Anolis carolinensis]
Unigene30408_NK	400	869	102.091	gi|465993675|gb|EMP39318.1|	132.9	4e-30	Transcription factor SOX-9 [Chelonia mydas]
Unigene29018_NK	3017	6553	102.069	gi|327281703|ref|XP_003225586.1|	344	2e-92	PREDICTED: protein tyrosine phosphatase type IVA 2-like [Anolis carolinensis]
Unigene14194_NK	1611	3497	102.007	gi|297263145|ref|XP_001093980.2|	386.7	1e-105	PREDICTED: hypothetical protein LOC705622 [Macaca mulatta]
Unigene30065_NK	304	657	101.559	gi|390348168|ref|XP_003726954.1|	69.3	6e-11	PREDICTED: uncharacterized protein LOC100892812 [Strongylocentrotus purpuratus]
Unigene26413_NK	782	1690	101.557	--	--	--	--
Unigene29691_NK	1040	2247	101.531	gi|327281163|ref|XP_003225319.1|	696	0	PREDICTED: protein arginine N-methyltransferase 1-like [Anolis carolinensis]
Unigene25636_NK	1470	3175	101.498	gi|327282894|ref|XP_003226177.1|	866.7	0	PREDICTED: stromal interaction molecule 2-like [Anolis carolinensis]
CL4223.Contig1_NK	1060	2287	101.389	--	--	--	--
Unigene28427_NK	661	1426	101.379	--	--	--	--
Unigene21679_NK	1801	3877	101.16	gi|327263786|ref|XP_003216698.1|	393.3	2e-107	PREDICTED: transforming protein RhoA-like [Anolis carolinensis]
Unigene22748_NK	2366	5085	100.996	gi|449499204|ref|XP_004176528.1|	864	0	PREDICTED: non-POU domain-containing octamer-binding protein [Taeniopygia guttata]
Unigene23658_NK	1563	3357	100.93	gi|327288502|ref|XP_003228965.1|	372.5	3e-101	PREDICTED: cationic amino acid transporter 3-like [Anolis carolinensis]
Unigene29351_NK	373	801	100.914	gi|390369102|ref|XP_001184017.2|	100.1	3e-20	PREDICTED: H(+)/Cl(-) exchange transporter 7-like, partial [Strongylocentrotus purpuratus]
Unigene22620_NK	1442	3095	100.861	gi|327259893|ref|XP_003214770.1|	801.2	0	PREDICTED: eukaryotic translation initiation factor 4 gamma 2-like [Anolis carolinensis]
CL2128.Contig4_NK	2517	5391	100.65	gi|148691289|gb|EDL23236.1|	907.5	0	tubulin, beta 5 [Mus musculus]
Unigene23782_NK	706	1511	100.575	gi|327286578|ref|XP_003228007.1|	112.8	1e-23	PREDICTED: stress-induced-phosphoprotein 1-like [Anolis carolinensis]
Unigene6616_NK	1740	3723	100.548	gi|327267692|ref|XP_003218633.1|	825.9	0	PREDICTED: ornithine aminotransferase, mitochondrial-like [Anolis carolinensis]
Unigene23756_NK	1149	2449	100.161	gi|363743689|ref|XP_003642894.1|	225.3	4e-57	PREDICTED: lipid phosphate phosphohydrolase 2-like [Gallus gallus]
Unigene27242_NK	2958	6297	100.038	gi|327287040|ref|XP_003228237.1|	1031.5	0	PREDICTED: UDP-N-acetylglucosamine--peptide N-acetylglucosaminyltransferase 110 kDa subunit-like isoform 3 [Anolis carolinensis]
Unigene27053_NK	2275	4828	99.7275	gi|327272860|ref|XP_003221202.1|	773.1	0	PREDICTED: nucleosome assembly protein 1-like 1-like [Anolis carolinensis]
Unigene20478_NK	352	747	99.7256	gi|465977412|gb|EMP34743.1|	240.7	1e-62	Actin-related protein 3, partial [Chelonia mydas]
Unigene13390_NK	447	948	99.662	gi|350538615|ref|NP_001232790.1|	171	1e-41	uncharacterized protein LOC100232347 [Taeniopygia guttata]
Unigene26917_NK	221	468	99.5136	--	--	--	--
Unigene26477_NK	1574	3330	99.4188	gi|465950605|gb|EMP23887.1|	349.7	2e-94	Epithelial cell adhesion molecule [Chelonia mydas]
Unigene9838_NK	250	528	99.2482	--	--	--	--
Unigene30039_NK	3253	6861	99.1134	gi|327282536|ref|XP_003225998.1|	869.8	0	PREDICTED: protein ERGIC-53-like [Anolis carolinensis]
CL66.Contig2_NK	1998	4203	98.8537	gi|226372474|gb|ACO51862.1|	201.4	1e-49	Transposable element Tc1 transposase [Rana catesbeiana]
Unigene13796_NK	832	1744	98.5036	--	--	--	--
Unigene28916_NK	789	1652	98.3925	gi|449496701|ref|XP_002188099.2|	255.8	1e-66	PREDICTED: heterogeneous nuclear ribonucleoprotein U [Taeniopygia guttata]
Unigene6553_NK	3102	6475	98.0905	gi|327278625|ref|XP_003224061.1|	757.3	0	PREDICTED: polymeric immunoglobulin receptor-like [Anolis carolinensis]
Unigene14132_NK	276	576	98.0714	gi|410969636|ref|XP_003991299.1|	56.6	4e-07	PREDICTED: nucleolin [Felis catus]
Unigene31541_NK	743	1547	97.8431	--	--	--	--
Unigene23481_NK	300	624	97.7445	gi|449489249|ref|XP_002188220.2|	94.7	1e-18	PREDICTED: UDP-N-acetylglucosamine--dolichyl-phosphate N-acetylglucosaminephosphotransferase, partial [Taeniopygia guttata]
CL2895.Contig3_NK	1439	2993	97.7406	--	--	--	--
CL4243.Contig1_NK	257	534	97.6421	--	--	--	--
CL1406.Contig1_NK	243	503	97.2726	--	--	--	--
Unigene6594_NK	1948	4032	97.2659	gi|327290272|ref|XP_003229847.1|	1074.7	0	PREDICTED: e3 ubiquitin-protein ligase synoviolin-like [Anolis carolinensis]
Unigene25645_NK	1587	3284	97.2423	--	--	--	--
Unigene30685_NK	312	644	96.9974	gi|465967333|gb|EMP31337.1|	72.8	5e-12	Hepatoma-derived growth factor [Chelonia mydas]
Unigene30440_NK	1323	2728	96.8977	--	--	--	--
Unigene31555_NK	896	1846	96.8172	gi|465999856|gb|EMP41082.1|	244.6	4e-63	Phosphorylase b kinase gamma catalytic chain, skeletal muscle isoform [Chelonia mydas]
Unigene31618_NK	650	1339	96.8046	gi|327286584|ref|XP_003228010.1|	267.3	3e-70	PREDICTED: peptidyl-prolyl cis-trans isomerase FKBP2-like [Anolis carolinensis]
Unigene22123_NK	451	929	96.7984	gi|224045955|ref|XP_002192792.1|	150.2	2e-35	PREDICTED: endoplasmic reticulum resident protein 44 [Taeniopygia guttata]
Unigene31390_NK	305	627	96.6043	gi|156602023|gb|ABU86898.1|	85.5	8e-16	MHC class II antigen [Ornithorhynchus anatinus]
Unigene26643_NK	284	581	96.1361	gi|339233834|ref|XP_003382034.1|	144.4	1e-33	putative integrase core domain protein [Trichinella spiralis] >gi|316979059|gb|EFV61911.1| putative integrase core domain protein [Trichinella spiralis]
Unigene31343_NK	245	499	95.7113	--	--	--	--
Unigene29942_NK	220	448	95.6939	gi|283765944|gb|ADB28364.1|	88.2	1e-16	MHC class Ia1 antigen allele A [Meleagris gallopavo]
CL64.Contig1_NK	553	1125	95.5996	gi|327269294|ref|XP_003219429.1|	198	1e-49	PREDICTED: GTPase IMAP family member 2-like [Anolis carolinensis]
Unigene6554_NK	2424	4930	95.5748	gi|465957654|gb|EMP27501.1|	864.8	0	AP-2 complex subunit mu-1, partial [Chelonia mydas]
Unigene25920_NK	693	1408	95.4769	--	--	--	--
Unigene20463_NK	244	495	95.3332	--	--	--	--
Unigene31591_NK	477	964	94.9702	gi|51814327|gb|AAU09480.1|	112.1	9e-24	GekBS039P [Gekko japonicus]
Unigene31566_NK	1097	2212	94.7561	gi|327265577|ref|XP_003217584.1|	379	2e-103	PREDICTED: PRELI domain-containing protein 1, mitochondrial-like [Anolis carolinensis]
Unigene27123_NK	3515	7073	94.5599	gi|327259625|ref|XP_003214636.1|	860.5	0	PREDICTED: LOW QUALITY PROTEIN: cyclic AMP-responsive element-binding protein 3-like protein 1-like [Anolis carolinensis]
Unigene27928_NK	5022	10085	94.3687	gi|327272416|ref|XP_003220981.1|	2224.9	0	PREDICTED: myosin-9-like [Anolis carolinensis]
Unigene22621_NK	1829	3667	94.2163	gi|449504086|ref|XP_002197262.2|	994.6	0	PREDICTED: eukaryotic translation initiation factor 4 gamma 2 [Taeniopygia guttata]
Unigene22403_NK	1419	2841	94.0844	gi|327264274|ref|XP_003216939.1|	431.8	4e-119	PREDICTED: b-cell receptor-associated protein 31-like [Anolis carolinensis]
Unigene29526_NK	814	1626	93.8696	--	--	--	--
Unigene21534_NK	2055	4100	93.7564	gi|327270872|ref|XP_003220212.1|	543.9	1e-152	PREDICTED: transmembrane protein 59-like [Anolis carolinensis]
Unigene6490_NK	434	864	93.552	--	--	--	--
Unigene31615_NK	300	596	93.3585	gi|284413724|ref|NP_001165115.1|	190.3	2e-47	signal peptidase complex subunit 1 homolog [Gallus gallus] >gi|284413726|ref|NP_001165116.1| signal peptidase complex subunit 1 homolog [Gallus gallus]
Unigene29543_NK	351	695	93.0479	--	--	--	--
Unigene28281_NK	445	879	92.8235	gi|465990406|gb|EMP38366.1|	155.6	6e-37	Immunoglobulin iota chain [Chelonia mydas]
Unigene31590_NK	1064	2096	92.5718	gi|327277121|ref|XP_003223314.1|	396.7	1e-108	PREDICTED: mitochondrial import inner membrane translocase subunit Tim23-like [Anolis carolinensis]
Unigene25607_NK	288	567	92.5166	--	--	--	--
Unigene31588_NK	1783	3510	92.5091	gi|327286705|ref|XP_003228070.1|	750.4	0	PREDICTED: serine incorporator 2-like [Anolis carolinensis]
Unigene31613_NK	662	1301	92.3524	--	--	--	--
Unigene25694_NK	972	1909	92.293	--	--	--	--
Unigene25085_NK	1305	2559	92.1486	--	--	--	--
Unigene25693_NK	3325	6519	92.1336	gi|327282726|ref|XP_003226093.1|	1447.2	0	PREDICTED: eukaryotic translation initiation factor 3 subunit B-like [Anolis carolinensis]
Unigene31564_NK	1685	3297	91.9492	gi|327270763|ref|XP_003220158.1|	663.7	0	PREDICTED: endophilin-B1-like isoform 1 [Anolis carolinensis]
CL785.Contig3_NK	250	489	91.9174	gi|82193158|sp|Q53B55.1|NXL31_OPHHA	63.9	2e-09	RecName: Full=Long neurotoxin-like OH-31; Flags: Precursor >gi|51105379|gb|AAT97253.1| long chain neurotoxin-like protein [Ophiophagus hannah]
Unigene27991_NK	491	959	91.7838	--	--	--	--
CL61.Contig2_NK	1057	2064	91.7622	--	--	--	--
CL5531.Contig8_NK	291	568	91.7243	--	--	--	--
Unigene22130_NK	580	1131	91.6354	--	--	--	--
Unigene25219_NK	821	1600	91.5811	gi|465999460|ref|XP_004268100.1|	80.9	8e-14	PREDICTED: signal peptidase complex catalytic subunit SEC11C [Orcinus orca] >gi|470605899|ref|XP_004314017.1| PREDICTED: signal peptidase complex catalytic subunit SEC11C [Tursiops truncatus]
Unigene31578_NK	3333	6491	91.5177	gi|326912625|ref|XP_003202649.1|	699.9	0	PREDICTED: peptidyl-prolyl cis-trans isomerase FKBP4-like [Meleagris gallopavo]
Unigene6632_NK	1273	2479	91.5118	gi|444711073|gb|ELW52027.1|	389.4	2e-106	UBX domain-containing protein 1 [Tupaia chinensis]
CL3531.Contig1_NK	451	877	91.3802	gi|291410120|ref|XP_002721359.1|	96.7	3e-19	PREDICTED: hCG2041603-like [Oryctolagus cuniculus]
Unigene15282_NK	358	696	91.3598	gi|327273205|ref|XP_003221371.1|	224.9	8e-58	PREDICTED: neural Wiskott-Aldrich syndrome protein-like [Anolis carolinensis]
CL1177.Contig2_NK	444	863	91.3391	--	--	--	--
Unigene10188_NK	1079	2097	91.3284	gi|327285830|ref|XP_003227635.1|	480.7	5e-134	PREDICTED: UPF0568 protein C14orf166-like [Anolis carolinensis]
Unigene31608_NK	1229	2388	91.3085	gi|327283181|ref|XP_003226320.1|	448	4e-124	PREDICTED: GTP-binding nuclear protein Ran-like isoform 1 [Anolis carolinensis] >gi|327283183|ref|XP_003226321.1| PREDICTED: GTP-binding nuclear protein Ran-like isoform 2 [Anolis carolinensis]
CL1597.Contig2_NK	1757	3408	91.15	gi|301609203|ref|XP_002934174.1|	39.7	1e-94	PREDICTED: hypothetical protein LOC100494971 [Xenopus (Silurana) tropicalis]
Unigene8350_NK	689	1333	90.9159	gi|149463071|ref|XP_001514439.1|	253.8	5e-66	PREDICTED: DNA-directed RNA polymerases I, II, and III subunit RPABC2-like [Ornithorhynchus anatinus] >gi|327284940|ref|XP_003227193.1| PREDICTED: DNA-directed RNA polymerases I, II, and III subunit RPABC2-like [Anolis carolinensis]
Unigene15252_NK	618	1195	90.8674	gi|327262260|ref|XP_003215943.1|	250.4	4e-65	PREDICTED: ribonuclease T2-like [Anolis carolinensis]
Unigene19256_NK	548	1057	90.6407	--	--	--	--
Unigene22314_NK	1879	3624	90.6338	gi|327286930|ref|XP_003228182.1|	514.6	7e-144	PREDICTED: derlin-1-like isoform 1 [Anolis carolinensis]
Unigene31570_NK	1446	2786	90.5403	gi|465967573|gb|EMP31416.1|	522.7	1e-146	Ribosome biogenesis protein NSA2 like protein [Chelonia mydas]
CL257.Contig1_NK	210	404	90.4047	--	--	--	--
Unigene6915_NK	1994	3829	90.2379	gi|327280872|ref|XP_003225175.1|	939.9	0	PREDICTED: aldehyde dehydrogenase, mitochondrial-like [Anolis carolinensis]
CL3487.Contig4_NK	1277	2450	90.158	gi|2331059|gb|AAC60281.1|	55.1	9e-06	unknown [Gallus gallus]
Unigene13389_NK	232	445	90.1365	gi|326931068|ref|XP_003211658.1|	72.8	5e-12	PREDICTED: ATP synthase subunit d, mitochondrial-like [Meleagris gallopavo]
Unigene31595_NK	2572	4923	89.9472	gi|449269658|gb|EMC80410.1|	1342	0	Threonyl-tRNA synthetase, cytoplasmic, partial [Columba livia]
Unigene29058_NK	1588	3038	89.9013	gi|465960899|gb|EMP29119.1|	42.7	8e-11	hypothetical protein UY3_13774 [Chelonia mydas]
Unigene31640_NK	349	667	89.811	gi|351704763|gb|EHB07682.1|	52.4	7e-06	Immunoglobulin G-binding protein A, partial [Heterocephalus glaber]
Unigene26286_NK	257	491	89.7795	gi|300218775|gb|ADJ80991.1|	64.3	2e-09	CR1-3 [Lycodichthys dearborni]
Unigene48_NK	376	718	89.7357	--	--	--	--
Unigene31544_NK	1002	1913	89.7173	gi|334325296|ref|XP_001365370.2|	107.5	1e-21	PREDICTED: small EDRK-rich factor 1-like [Monodelphis domestica]
CL1151.Contig1_NK	1745	3328	89.6224	gi|359318839|ref|XP_003432729.2|	64.3	2e-08	PREDICTED: histone-lysine N-methyltransferase MLL4, partial [Canis lupus familiaris]
Unigene31581_NK	1872	3567	89.5419	gi|327264485|ref|XP_003217044.1|	961.4	0	PREDICTED: ATP synthase subunit beta, mitochondrial-like [Anolis carolinensis]
Unigene31551_NK	1734	3304	89.5406	gi|327290469|ref|XP_003229945.1|	839	0	PREDICTED: isocitrate dehydrogenase [NADP], mitochondrial-like [Anolis carolinensis]
Unigene25653_NK	211	402	89.5308	--	--	--	--
Unigene7825_NK	1970	3753	89.5244	gi|327283035|ref|XP_003226247.1|	787.3	0	PREDICTED: nucleobindin-1-like [Anolis carolinensis]
Unigene31264_NK	356	678	89.497	--	--	--	--
Unigene21129_NK	378	719	89.3853	--	--	--	--
Unigene27856_NK	457	869	89.3578	--	--	--	--
Unigene6635_NK	1574	2989	89.2381	gi|449282373|gb|EMC89217.1|	808.1	0	Eukaryotic translation initiation factor 2 subunit 3, partial [Columba livia]
Unigene31584_NK	1440	2729	89.0574	gi|215422358|ref|NP_001135862.1|	704.5	0	proteasome (prosome, macropain) 26S subunit, non-ATPase, 4 [Gallus gallus]
Unigene7754_NK	769	1456	88.9742	gi|111601559|gb|AAI19733.1|	210.3	7e-53	FKBP1A protein [Homo sapiens]
Unigene23428_NK	614	1162	88.9338	gi|327261054|ref|XP_003215347.1|	282.3	1e-74	PREDICTED: dnaJ homolog subfamily B member 9-like isoform 1 [Anolis carolinensis] >gi|327261056|ref|XP_003215348.1| PREDICTED: dnaJ homolog subfamily B member 9-like isoform 2 [Anolis carolinensis]
Unigene15264_NK	349	660	88.8684	gi|471360282|ref|XP_004370711.1|	98.2	1e-19	PREDICTED: ras GTPase-activating-like protein IQGAP1 [Trichechus manatus latirostris]
Unigene392_NK	1094	2068	88.8305	--	--	--	--
Unigene6604_NK	505	953	88.681	gi|350535731|ref|NP_001232443.1|	287.3	1e-76	putative peroxiredoxin 1 variant 3 [Taeniopygia guttata] >gi|197128343|gb|ACH44841.1| putative peroxiredoxin 1 variant 3 [Taeniopygia guttata]
Unigene31574_NK	915	1726	88.6438	gi|326928241|ref|XP_003210289.1|	219.6	1e-55	PREDICTED: UPF0467 protein C5orf32 homolog [Meleagris gallopavo]
Unigene26315_NK	891	1679	88.5527	gi|466003434|gb|EMP42094.1|	335.5	2e-90	Complement C1q subcomponent subunit B [Chelonia mydas]
Unigene6625_NK	1679	3153	88.2474	gi|327273688|ref|XP_003221612.1|	781.6	0	PREDICTED: multifunctional protein ADE2-like [Anolis carolinensis]
Unigene14260_NK	816	1532	88.2262	gi|239618555|gb|ACR83850.1|	290.4	6e-77	cystatin precursor [Naja kaouthia]
CL5424.Contig13_NK	242	454	88.1596	gi|408816336|dbj|BAM62877.1|	79.3	5e-14	L1-encoded reverse transcriptase-like protein [Trimeresurus flavoviridis]
Unigene38_NK	344	645	88.111	gi|4378025|gb|AAD19348.1|	100.1	3e-20	reverse transcriptase-like protein [Takifugu rubripes]
Unigene25656_NK	1435	2689	88.0578	gi|327276297|ref|XP_003222906.1|	434.1	8e-120	PREDICTED: intermediate conductance calcium-activated potassium channel protein 4-like [Anolis carolinensis]
Unigene24052_NK	481	901	88.0255	gi|471371164|ref|XP_004376090.1|	62.4	8e-09	PREDICTED: DNA-directed RNA polymerase II subunit RPB1 [Trichechus manatus latirostris]
Unigene13532_NK	536	999	87.585	gi|327276986|ref|XP_003223247.1|	252.7	6e-66	PREDICTED: ORM1-like protein 2-like [Anolis carolinensis]
Unigene20652_NK	343	639	87.5459	--	--	--	--
Unigene22339_NK	382	711	87.4652	--	--	--	--
Unigene7744_NK	1636	3042	87.3785	gi|363739241|ref|XP_003642145.1|	402.9	2e-110	PREDICTED: NEDD4 family-interacting protein 1-like [Gallus gallus] >gi|363739251|ref|XP_414658.3| PREDICTED: NEDD4 family-interacting protein 1 [Gallus gallus]
Unigene31593_NK	1187	2207	87.3737	gi|327288502|ref|XP_003228965.1|	652.1	0	PREDICTED: cationic amino acid transporter 3-like [Anolis carolinensis]
Unigene31629_NK	972	1805	87.2649	gi|466070441|ref|XP_004282303.1|	162.5	2e-38	PREDICTED: uncharacterized protein LOC101288017 [Orcinus orca]
Unigene31009_NK	2198	4079	87.2077	gi|327271395|ref|XP_003220473.1|	63.5	5e-08	PREDICTED: UPF0577 protein KIAA1324-like [Anolis carolinensis]
Unigene24370_NK	733	1360	87.1894	gi|327290955|ref|XP_003230187.1|	325.5	1e-87	PREDICTED: prenylated Rab acceptor protein 1-like [Anolis carolinensis]
Unigene24901_NK	2303	4262	86.9658	gi|327266794|ref|XP_003218189.1|	766.5	0	PREDICTED: translocation protein SEC62-like [Anolis carolinensis]
Unigene30196_NK	494	913	86.8506	--	--	--	--
Unigene29160_NK	544	1005	86.8153	gi|327274637|ref|XP_003222083.1|	70.1	5e-11	PREDICTED: heterogeneous nuclear ribonucleoproteins A2/B1-like [Anolis carolinensis]
Unigene31647_NK	410	757	86.7643	gi|327271499|ref|XP_003220525.1|	162.2	7e-39	PREDICTED: reactive oxygen species modulator 1-like [Anolis carolinensis]
CL4062.Contig1_NK	339	623	86.3609	--	--	--	--
Unigene31624_NK	927	1703	86.3304	gi|327286564|ref|XP_003228000.1|	393.3	9e-108	PREDICTED: proteasome subunit beta type-4-like [Anolis carolinensis]
Unigene6602_NK	485	890	86.2337	gi|432101167|gb|ELK29451.1|	54.7	1e-06	Cytochrome b-c1 complex subunit 10 [Myotis davidii]
Unigene777_NK	3984	7306	86.1766	gi|327280190|ref|XP_003224836.1|	750.7	0	PREDICTED: kunitz-type protease inhibitor 1-like [Anolis carolinensis]
CL511.Contig1_NK	1007	1842	85.9585	--	--	--	--
Unigene31602_NK	679	1242	85.9569	gi|50807217|ref|XP_424552.1|	102.4	1e-20	PREDICTED: 39S ribosomal protein L34, mitochondrial [Gallus gallus]
CL3493.Contig3_NK	2111	3857	85.8599	gi|224066373|ref|XP_002188184.1|	976.5	0	PREDICTED: inosine-5&apos;-monophosphate dehydrogenase 2 [Taeniopygia guttata]
CL2005.Contig1_NK	1541	2815	85.843	gi|281352122|gb|EFB27706.1|	57	3e-06	hypothetical protein PANDA_010928 [Ailuropoda melanoleuca]
CL3498.Contig1_NK	594	1082	85.5992	--	--	--	--
Unigene22079_NK	4611	8396	85.567	gi|327286801|ref|XP_003228118.1|	1452.2	0	PREDICTED: disintegrin and metalloproteinase domain-containing protein 10-like [Anolis carolinensis]
Unigene13669_NK	840	1526	85.3698	gi|440907831|gb|ELR57927.1|	395.6	1e-108	Ras-related protein Rab-1A, partial [Bos grunniens mutus]
Unigene15193_NK	1018	1849	85.3528	gi|327274220|ref|XP_003221876.1|	82	5e-14	PREDICTED: c-X-C motif chemokine 11-like [Anolis carolinensis]
CL3939.Contig6_NK	212	385	85.3402	gi|49022437|dbj|BAD23969.1|	89	7e-17	MHC class I antigen [Anas platyrhynchos]
Unigene29363_NK	250	454	85.3384	gi|390336705|ref|XP_001191426.2|	83.2	4e-15	PREDICTED: uncharacterized protein LOC755711 [Strongylocentrotus purpuratus]
Unigene31605_NK	484	878	85.2468	gi|118091656|ref|XP_421155.2|	153.7	2e-36	PREDICTED: transmembrane protein 87A-like [Gallus gallus]
Unigene14292_NK	1470	2663	85.13	gi|327281194|ref|XP_003225334.1|	839.7	0	PREDICTED: dolichyl-diphosphooligosaccharide--protein glycosyltransferase subunit 2-like [Anolis carolinensis]
Unigene26457_NK	266	481	84.9752	--	--	--	--
Unigene31594_NK	1098	1984	84.9118	--	--	--	--
Unigene1113_NK	2402	4340	84.9074	gi|224043699|ref|XP_002189079.1|	1125.5	0	PREDICTED: phosphatidylinositol-binding clathrin assembly protein isoform 1 [Taeniopygia guttata]
Unigene31599_NK	802	1448	84.8444	gi|327280941|ref|XP_003225209.1|	139.8	1e-31	PREDICTED: CD59 glycoprotein-like [Anolis carolinensis]
Unigene20556_NK	1387	2504	84.8373	gi|327275015|ref|XP_003222269.1|	60.5	2e-07	PREDICTED: protein disulfide-isomerase A4-like [Anolis carolinensis]
Unigene15297_NK	908	1636	84.6694	gi|327283929|ref|XP_003226692.1|	56.2	2e-06	PREDICTED: eukaryotic translation initiation factor 3 subunit A-like [Anolis carolinensis]
Unigene22204_NK	2128	3833	84.644	gi|449273152|gb|EMC82760.1|	341.7	9e-92	Cbp/p300-interacting transactivator 2 [Columba livia]
Unigene30586_NK	397	715	84.6339	gi|197128013|gb|ACH44511.1|	206.1	4e-52	putative RIKEN cDNA 2310005N01 variant 1 [Taeniopygia guttata]
Unigene10587_NK	1513	2724	84.6052	gi|327263385|ref|XP_003216500.1|	619.8	1e-175	PREDICTED: fructose-1,6-bisphosphatase 1-like [Anolis carolinensis]
CL96.Contig3_NK	214	385	84.5426	--	--	--	--
Unigene30728_NK	412	739	84.29	--	--	--	--
CL3932.Contig2_NK	353	633	84.2671	gi|471368189|ref|XP_004374621.1|	183.3	2e-45	PREDICTED: 40S ribosomal protein S23 [Trichechus manatus latirostris]
CL1885.Contig1_NK	3225	5781	84.2369	gi|449488794|ref|XP_002188731.2|	167.2	5e-39	PREDICTED: LOW QUALITY PROTEIN: uncharacterized protein LOC100231405 [Taeniopygia guttata]
Unigene679_NK	907	1622	84.0374	gi|327261177|ref|XP_003215408.1|	126.7	1e-27	PREDICTED: CD2-associated protein-like [Anolis carolinensis]
Unigene30142_NK	1485	2654	83.9853	gi|211926750|dbj|BAG82599.1|	753.4	0	aminopeptidase N [Gloydius brevicaudus]
CL66.Contig4_NK	361	645	83.9617	--	--	--	--
Unigene29750_NK	470	837	83.6867	--	--	--	--
Unigene31550_NK	1221	2171	83.5551	--	--	--	--
Unigene23960_NK	2694	4787	83.5016	gi|348517548|ref|XP_003446295.1|	402.9	4e-110	PREDICTED: ras-related protein Rab-10-like [Oreochromis niloticus]
CL2927.Contig2_NK	402	713	83.3475	gi|283464201|gb|ADB22684.1|	174.5	1e-42	lambda immunoglobulin light chain [Anolis carolinensis]
Unigene9660_NK	1178	2089	83.334	gi|327259323|ref|XP_003214487.1|	383.6	1e-104	PREDICTED: transmembrane emp24 domain-containing protein 10-like [Anolis carolinensis]
Unigene17718_NK	805	1427	83.3023	gi|327289111|ref|XP_003229268.1|	393.7	5e-108	PREDICTED: proteasome subunit beta type-2-like [Anolis carolinensis]
Unigene20437_NK	1560	2765	83.2913	gi|449265976|gb|EMC77103.1|	1043.5	0	Pre-mRNA-processing-splicing factor 8, partial [Columba livia]
Unigene13458_NK	2429	4305	83.2865	gi|327278082|ref|XP_003223791.1|	1174.1	0	PREDICTED: complement C1r subcomponent-like [Anolis carolinensis]
Unigene6609_NK	434	769	83.2656	gi|61098232|ref|NP_001012789.1|	150.2	2e-35	eukaryotic translation initiation factor 3 subunit J [Gallus gallus] >gi|82082038|sp|Q5ZKA4.1|EIF3J_CHICK RecName: Full=Eukaryotic translation initiation factor 3 subunit J; Short=eIF3j; AltName: Full=Eukaryotic translation initiation factor 3 subunit 1; AltName: Full=eIF-3-alpha; AltName: Full=eIF3 p35
Unigene15203_NK	472	832	82.8343	--	--	--	--
Unigene24582_NK	2332	4110	82.8213	gi|327289501|ref|XP_003229463.1|	951	0	PREDICTED: LOW QUALITY PROTEIN: cadherin-1-like, partial [Anolis carolinensis]
Unigene31597_NK	1915	3375	82.8197	gi|327291570|ref|XP_003230494.1|	292.7	4e-77	PREDICTED: actin-related protein 2/3 complex subunit 5-like [Anolis carolinensis]
Unigene13471_NK	1106	1944	82.5981	gi|327286546|ref|XP_003227991.1|	397.1	8e-109	PREDICTED: PIN2/TERF1-interacting telomerase inhibitor 1-like [Anolis carolinensis]
Unigene24144_NK	1324	2326	82.5564	gi|67464143|pdb|1T91|A	77	2e-12	Chain A, Crystal Structure Of Human Small Gtpase Rab7(Gtp) >gi|67464144|pdb|1T91|B Chain B, Crystal Structure Of Human Small Gtpase Rab7(Gtp) >gi|67464145|pdb|1T91|C Chain C, Crystal Structure Of Human Small Gtpase Rab7(Gtp) >gi|67464146|pdb|1T91|D Chain D, Crystal Structure Of Human Small Gtpase Rab7(Gtp) >gi|67464282|pdb|1YHN|A Chain A, Structure Basis Of Rilp Recruitment By Rab7
Unigene26764_NK	556	976	82.4905	gi|327261222|ref|XP_003215430.1|	379.4	4e-104	PREDICTED: grainyhead-like protein 1 homolog [Anolis carolinensis]
Unigene29044_NK	7174	12552	82.2206	gi|327282730|ref|XP_003226095.1|	827	0	PREDICTED: protein tweety homolog 3-like [Anolis carolinensis]
Unigene15639_NK	594	1039	82.1974	gi|49659864|gb|AAT68231.1|	159.5	9e-38	GekBS029P [Gekko japonicus] >gi|50881972|gb|AAT85561.1| BS010P [Gekko japonicus]
Unigene6600_NK	828	1437	81.5559	--	--	--	--
Unigene31137_NK	2742	4757	81.5257	gi|449499923|ref|XP_004175397.1|	1392.9	0	PREDICTED: LOW QUALITY PROTEIN: protein transport protein Sec31A [Taeniopygia guttata]
Unigene6596_NK	833	1444	81.4613	--	--	--	--
Unigene25505_NK	3812	6606	81.4356	gi|327276851|ref|XP_003223180.1|	1194.9	0	PREDICTED: transmembrane 9 superfamily member 3-like [Anolis carolinensis]
Unigene31609_NK	782	1355	81.4257	gi|194212738|ref|XP_001501010.2|	206.8	9e-52	PREDICTED: tetratricopeptide repeat protein 36-like [Equus caballus]
Unigene29830_NK	2066	3571	81.2248	--	--	--	--
Unigene31670_NK	238	411	81.151	--	--	--	--
Unigene28204_NK	1855	3199	81.04	gi|327261177|ref|XP_003215408.1|	97.8	2e-18	PREDICTED: CD2-associated protein-like [Anolis carolinensis]
CL167.Contig1_NK	489	843	81.0117	gi|327271319|ref|XP_003220435.1|	101.7	1e-20	PREDICTED: UHRF1-binding protein 1-like [Anolis carolinensis]
CL4574.Contig15_NK	369	636	80.9953	--	--	--	--
Unigene20163_NK	513	884	80.9774	--	--	--	--
Unigene28802_NK	1573	2710	80.9598	gi|327274369|ref|XP_003221950.1|	476.1	2e-132	PREDICTED: Golgi reassembly-stacking protein 1-like [Anolis carolinensis]
Unigene14210_NK	1080	1858	80.8446	gi|225542810|gb|ACN91288.1|	58.5	6e-07	dentin sialophosphoprotein precursor [Lemur catta]
Unigene15386_NK	1877	3226	80.7661	gi|465951096|gb|EMP24115.1|	168.3	1e-39	Plasmalemma vesicle-associated protein [Chelonia mydas]
Unigene31196_NK	614	1054	80.668	--	--	--	--
Unigene22132_NK	229	393	80.6466	--	--	--	--
Unigene13594_NK	926	1586	80.4861	gi|465979200|gb|EMP35185.1|	233.4	1e-59	Protein CNPPD1 [Chelonia mydas]
Unigene26525_NK	295	504	80.2856	--	--	--	--
Unigene29904_NK	1365	2331	80.2488	gi|55732943|emb|CAH93159.1|	547.7	5e-154	hypothetical protein [Pongo abelii]
Unigene20098_NK	388	662	80.178	gi|47220009|emb|CAG11542.1|	176	4e-43	unnamed protein product [Tetraodon nigroviridis]
Unigene27364_NK	807	1375	80.0678	--	--	--	--
Unigene31620_NK	372	633	79.9631	gi|5453640|ref|NP_006295.1|	148.7	8e-35	26S proteasome complex subunit DSS1 [Homo sapiens] >gi|6677941|ref|NP_033195.1| 26S proteasome complex subunit DSS1 [Mus musculus] >gi|164519014|ref|NP_001106788.1| 26S proteasome complex subunit DSS1 [Bos taurus] >gi|186910257|ref|NP_001119562.1| 26S proteasome complex subunit DSS1 [Rattus norvegicus] >gi|388453069|ref|NP_001253734.1| 26S proteasome complex subunit DSS1 [Macaca mulatta] >gi|4639…
Unigene20224_NK	863	1468	79.9363	--	--	--	--
CL3939.Contig7_NK	1604	2726	79.8639	gi|188501719|gb|ACD54828.1|	403.3	1e-110	MHC class I antigen [Amblyrhynchus cristatus]
Unigene26509_NK	1307	2214	79.6033	gi|327266668|ref|XP_003218126.1|	411.8	4e-113	PREDICTED: vesicle-trafficking protein SEC22b-like [Anolis carolinensis]
Unigene758_NK	264	447	79.5669	gi|4378025|gb|AAD19348.1|	61.6	1e-08	reverse transcriptase-like protein [Takifugu rubripes]
Unigene29366_NK	891	1506	79.4285	gi|444727283|gb|ELW67784.1|	342	2e-92	BAI1-associated protein 3 [Tupaia chinensis]
Unigene23979_NK	2892	4884	79.3608	gi|327285782|ref|XP_003227611.1|	807.4	0	PREDICTED: adenylyl cyclase-associated protein 1-like [Anolis carolinensis]
Unigene30798_NK	723	1221	79.3608	--	--	--	--
Unigene6552_NK	515	869	79.2942	--	--	--	--
Unigene20947_NK	2967	5006	79.287	gi|116243063|sp|Q0GNE0.1|CISY_IGUIG	927.2	0	RecName: Full=Citrate synthase, mitochondrial; Flags: Precursor >gi|112791217|gb|ABI21882.1| citrate synthase [Iguana iguana]
Unigene10479_NK	559	943	79.2736	--	--	--	--
Unigene7753_NK	699	1178	79.1949	--	--	--	--
Unigene21889_NK	2353	3964	79.1663	gi|327272356|ref|XP_003220951.1|	261.2	1e-67	PREDICTED: endoplasmin-like [Anolis carolinensis]
Unigene6634_NK	1645	2767	79.0446	gi|327269795|ref|XP_003219678.1|	533.5	1e-149	PREDICTED: syntenin-1-like isoform 1 [Anolis carolinensis]
Unigene31233_NK	261	439	79.0411	--	--	--	--
CL3160.Contig2_NK	817	1373	78.9728	gi|327272988|ref|XP_003221265.1|	450.3	5e-125	PREDICTED: f-actin-capping protein subunit alpha-2-like [Anolis carolinensis]
Unigene29737_NK	1168	1960	78.8573	gi|351697426|gb|EHB00345.1|	397.5	6e-109	Protein RER1 [Heterocephalus glaber]
Unigene24339_NK	1320	2215	78.8549	gi|297682633|ref|XP_002819017.1|	650.6	0	PREDICTED: serine/threonine-protein phosphatase 2A catalytic subunit beta isoform isoform 1 [Pongo abelii] >gi|395739560|ref|XP_003777280.1| PREDICTED: serine/threonine-protein phosphatase 2A catalytic subunit beta isoform isoform 2 [Pongo abelii]
Unigene23793_NK	2810	4715	78.8505	gi|148224158|ref|NP_001084140.1|	702.2	0	guanine nucleotide-binding protein G(I)/G(S)/G(T) subunit beta-1 [Xenopus laevis] >gi|54261466|gb|AAH84263.1| XGbeta1 protein [Xenopus laevis]
Unigene25598_NK	269	451	78.7867	--	--	--	--
Unigene27954_NK	2641	4426	78.7539	gi|327278100|ref|XP_003223800.1|	682.6	0	PREDICTED: UV excision repair protein RAD23 homolog B-like [Anolis carolinensis]
Unigene23808_NK	1257	2105	78.6947	gi|327266031|ref|XP_003217810.1|	523.9	7e-147	PREDICTED: coatomer subunit gamma-like [Anolis carolinensis]
Unigene24509_NK	1186	1986	78.6907	--	--	--	--
Unigene22248_NK	1028	1720	78.6256	--	--	--	--
Unigene15352_NK	294	491	78.4807	--	--	--	--
CL662.Contig1_NK	1508	2518	78.4663	--	--	--	--
Unigene15697_NK	1161	1935	78.3209	gi|327263703|ref|XP_003216657.1|	527.3	5e-148	PREDICTED: regulator of differentiation 1-like [Anolis carolinensis]
Unigene25220_NK	638	1061	78.149	--	--	--	--
Unigene31636_NK	1375	2284	78.0589	gi|327279906|ref|XP_003224696.1|	588.6	2e-166	PREDICTED: beta-1,4-galactosyltransferase 1-like [Anolis carolinensis]
Unigene26301_NK	771	1280	78.0161	gi|327278232|ref|XP_003223866.1|	64.7	5e-09	PREDICTED: hypothetical protein LOC100556650 [Anolis carolinensis]
Unigene31621_NK	803	1333	78.0088	gi|187373263|gb|ACD03295.1|	114.8	4e-24	ISG15 ubiquitin-like modifier [Sus scrofa]
Unigene15354_NK	1497	2481	77.8814	gi|384254937|gb|AFH75303.1|	190.3	2e-46	DMA [Lyrurus tetrix]
Unigene6493_NK	1478	2449	77.8652	gi|326931320|ref|XP_003211780.1|	734.2	0	PREDICTED: t-complex protein 1 subunit zeta-like, partial [Meleagris gallopavo]
Unigene1134_NK	2137	3539	77.8225	gi|224054708|ref|XP_002192499.1|	798.9	0	PREDICTED: myc box-dependent-interacting protein 1 isoform 1 [Taeniopygia guttata]
Unigene20940_NK	634	1048	77.6785	gi|327264291|ref|XP_003216947.1|	355.1	1e-96	PREDICTED: n-alpha-acetyltransferase 10, NatA catalytic subunit-like [Anolis carolinensis]
Unigene15388_NK	399	659	77.6142	--	--	--	--
Unigene31586_NK	1679	2773	77.6119	--	--	--	--
Unigene31562_NK	1208	1994	77.5688	gi|197129946|gb|ACH46444.1|	269.2	2e-70	putative IscU iron-sulfur cluster scaffold variant 2 [Taeniopygia guttata]
Unigene8251_NK	1669	2750	77.4293	gi|327288018|ref|XP_003228725.1|	446.4	2e-123	PREDICTED: acidic leucine-rich nuclear phosphoprotein 32 family member E-like isoform 1 [Anolis carolinensis]
Unigene30524_NK	855	1407	77.3316	--	--	--	--
Unigene17123_NK	463	761	77.2383	gi|327288620|ref|XP_003229024.1|	174.9	1e-42	PREDICTED: ATP synthase subunit g, mitochondrial-like [Anolis carolinensis]
Unigene1131_NK	2126	3493	77.2083	gi|327263983|ref|XP_003216796.1|	905.6	0	PREDICTED: tubulin beta-4 chain-like [Anolis carolinensis]
Unigene6489_NK	249	409	77.1885	--	--	--	--
CL1832.Contig1_NK	200	328	77.0678	gi|327278653|ref|XP_003224075.1|	55.5	9e-07	PREDICTED: complement decay-accelerating factor-like [Anolis carolinensis]
Unigene25666_NK	1230	2017	77.0601	gi|12847552|dbj|BAB27616.1|	38.1	1e-72	unnamed protein product [Mus musculus]
Unigene29837_NK	208	341	77.0406	--	--	--	--
CL3455.Contig2_NK	2052	3363	77.0155	gi|327263225|ref|XP_003216421.1|	1014.2	0	PREDICTED: RNA polymerase II elongation factor ELL2-like [Anolis carolinensis]
CL3939.Contig12_NK	1617	2650	77.0131	gi|188501719|gb|ACD54828.1|	403.3	1e-110	MHC class I antigen [Amblyrhynchus cristatus]
Unigene20258_NK	368	603	77.0014	--	--	--	--
Unigene23735_NK	1748	2860	76.8871	gi|363737852|ref|XP_001233495.2|	298.1	9e-79	PREDICTED: calcium and integrin-binding protein 1 [Gallus gallus]
Unigene13486_NK	4197	6856	76.7646	gi|327260450|ref|XP_003215047.1|	1429.1	0	PREDICTED: oxysterol-binding protein 1-like [Anolis carolinensis]
Unigene27992_NK	778	1269	76.6498	--	--	--	--
CL5643.Contig2_NK	657	1071	76.6043	gi|327286138|ref|XP_003227788.1|	32.7	1e-09	PREDICTED: zinc finger protein 224-like, partial [Anolis carolinensis]
Unigene13563_NK	2025	3300	76.5804	gi|327280292|ref|XP_003224886.1|	954.9	0	PREDICTED: cyclin-K-like [Anolis carolinensis]
Unigene29132_NK	377	614	76.5343	gi|327259146|ref|XP_003214399.1|	184.1	1e-45	PREDICTED: tandem C2 domains nuclear protein-like [Anolis carolinensis]
Unigene26750_NK	495	806	76.5171	gi|327272896|ref|XP_003221220.1|	61.2	2e-08	PREDICTED: heterogeneous nuclear ribonucleoprotein D-like [Anolis carolinensis]
CL2895.Contig2_NK	1923	3131	76.5125	--	--	--	--
Unigene28945_NK	870	1416	76.4844	--	--	--	--
Unigene20793_NK	1210	1965	76.3143	gi|354491741|ref|XP_003508013.1|	485	3e-135	PREDICTED: annexin A4-like isoform 1 [Cricetulus griseus] >gi|354491743|ref|XP_003508014.1| PREDICTED: annexin A4-like isoform 2 [Cricetulus griseus]
Unigene31651_NK	891	1445	76.2112	gi|327288266|ref|XP_003228849.1|	330.9	5e-89	PREDICTED: 28 kDa heat- and acid-stable phosphoprotein-like [Anolis carolinensis]
Unigene13615_NK	1129	1829	76.1287	gi|119615680|gb|EAW95274.1|	119	4e-25	hCG2040005 [Homo sapiens]
Unigene31611_NK	1235	2000	76.1013	gi|327288084|ref|XP_003228758.1|	655.6	0	PREDICTED: eukaryotic translation initiation factor 3 subunit I-like [Anolis carolinensis]
Unigene28851_NK	850	1376	76.0726	gi|403267085|ref|XP_003925682.1|	33.1	8e-06	PREDICTED: ras-associated and pleckstrin homology domains-containing protein 1 [Saimiri boliviensis boliviensis]
Unigene14224_NK	2189	3542	76.0382	gi|465999553|gb|EMP40946.1|	630.6	1e-178	Zinc finger protein 36, C3H1 type-like 1 [Chelonia mydas]
Unigene31610_NK	1508	2433	75.8175	gi|465990833|gb|EMP38485.1|	193	3e-47	hypothetical protein UY3_04269 [Chelonia mydas]
Unigene24903_NK	1266	2040	75.7226	gi|465958573|gb|EMP27950.1|	669.5	0	LAG1 longevity assurance like protein 2 [Chelonia mydas]
Unigene13833_NK	2549	4101	75.6047	gi|327287320|ref|XP_003228377.1|	265	1e-68	PREDICTED: v-type proton ATPase 16 kDa proteolipid subunit-like [Anolis carolinensis]
Unigene937_NK	868	1393	75.4154	--	--	--	--
Unigene31666_NK	286	458	75.2538	--	--	--	--
Unigene6613_NK	3829	6125	75.1709	gi|334327112|ref|XP_001363869.2|	1967.2	0	PREDICTED: sarcoplasmic/endoplasmic reticulum calcium ATPase 2-like [Monodelphis domestica]
Unigene15367_NK	754	1206	75.1631	--	--	--	--
Unigene20162_NK	354	566	75.135	--	--	--	--
Unigene23366_NK	1225	1957	75.073	--	--	--	--
CL2364.Contig2_NK	2613	4174	75.0658	gi|327280592|ref|XP_003225036.1|	930.2	0	PREDICTED: CCR4-NOT transcription complex subunit 3-like [Anolis carolinensis]
CL5654.Contig1_NK	250	399	75.0001	--	--	--	--
Unigene23519_NK	339	541	74.994	--	--	--	--
Unigene13821_NK	2089	3333	74.9766	gi|327263762|ref|XP_003216686.1|	340.9	1e-91	PREDICTED: DAZ-associated protein 2-like isoform 1 [Anolis carolinensis]
Unigene30499_NK	691	1100	74.8072	--	--	--	--
Unigene24569_NK	218	347	74.8	--	--	--	--
Unigene9901_NK	2140	3406	74.7928	gi|327260572|ref|XP_003215108.1|	663.7	0	PREDICTED: gap junction gamma-1 protein-like [Anolis carolinensis]
Unigene29757_NK	577	916	74.6017	--	--	--	--
Unigene1122_NK	2430	3856	74.5692	gi|327288724|ref|XP_003229076.1|	360.1	3e-97	PREDICTED: induced myeloid leukemia cell differentiation protein Mcl-1 homolog [Anolis carolinensis]
Unigene6598_NK	1209	1918	74.5506	gi|20067631|emb|CAC83780.1|	789.3	0	phosphoglucose isomerase [Boiga kraepelini]
Unigene13677_NK	654	1037	74.5126	gi|147901416|ref|NP_001090500.1|	287.7	2e-76	uncharacterized protein LOC779413 [Xenopus laevis] >gi|116063424|gb|AAI23358.1| MGC154858 protein [Xenopus laevis]
Unigene13482_NK	800	1268	74.4832	gi|327267903|ref|XP_003218738.1|	436	9e-121	PREDICTED: NEDD4 family-interacting protein 2-like isoform 1 [Anolis carolinensis]
Unigene25039_NK	565	895	74.4395	gi|327270170|ref|XP_003219863.1|	250.4	3e-65	PREDICTED: cleft lip and palate transmembrane protein 1-like protein-like [Anolis carolinensis]
Unigene23261_NK	727	1150	74.3348	gi|148222280|ref|NP_001085215.1|	190.3	7e-47	SGT1, suppressor of G2 allele of SKP1 [Xenopus laevis] >gi|47937546|gb|AAH72118.1| MGC79143 protein [Xenopus laevis]
Unigene25362_NK	702	1110	74.3044	gi|426235322|ref|XP_004011633.1|	110.5	7e-23	PREDICTED: protein tyrosine phosphatase type IVA 1-like isoform 2 [Ovis aries]
Unigene22471_NK	1581	2499	74.2785	gi|338855272|gb|AEJ31965.1|	724.9	0	cysteine-rich with EGF-like domain [Crotalus adamanteus]
Unigene13670_NK	1075	1698	74.2264	--	--	--	--
Unigene6612_NK	801	1261	73.9795	gi|327259913|ref|XP_003214780.1|	332.4	1e-89	PREDICTED: transmembrane protein 9B-like [Anolis carolinensis]
Unigene31600_NK	996	1567	73.933	gi|327271415|ref|XP_003220483.1|	356.3	1e-96	PREDICTED: ATP synthase subunit b, mitochondrial-like isoform 1 [Anolis carolinensis]
Unigene30893_NK	1068	1679	73.8768	gi|465953789|gb|EMP25546.1|	134.4	9e-30	GTPase IMAP family member 2 [Chelonia mydas]
Unigene31638_NK	1156	1817	73.8628	gi|327284213|ref|XP_003226833.1|	627.9	3e-178	PREDICTED: eukaryotic translation initiation factor 3 subunit G-like [Anolis carolinensis]
Unigene1038_NK	1630	2557	73.7177	gi|327268668|ref|XP_003219118.1|	683.7	0	PREDICTED: e3 ubiquitin-protein ligase listerin-like isoform 2 [Anolis carolinensis]
Unigene31616_NK	380	596	73.7041	gi|327288847|ref|XP_003229136.1|	140.2	2e-32	PREDICTED: 28S ribosomal protein S21, mitochondrial-like [Anolis carolinensis]
Unigene6591_NK	4300	6735	73.6034	gi|327286598|ref|XP_003228017.1|	1181	0	PREDICTED: niban-like protein 1-like [Anolis carolinensis]
CL971.Contig1_NK	818	1279	73.4761	--	--	--	--
Unigene15387_NK	266	415	73.3154	--	--	--	--
Unigene31572_NK	1644	2564	73.2901	gi|327271477|ref|XP_003220514.1|	917.9	0	PREDICTED: tubulin alpha-1C chain-like [Anolis carolinensis]
Unigene26640_NK	2173	3389	73.2893	gi|327278669|ref|XP_003224083.1|	218.4	1e-54	PREDICTED: heat shock 70 kDa protein 13-like [Anolis carolinensis]
CL483.Contig2_NK	318	495	73.1488	gi|301607526|ref|XP_002933359.1|	41.2	4e-17	PREDICTED: uncharacterized protein K02A2.6-like [Xenopus (Silurana) tropicalis]
Unigene30800_NK	606	943	73.1253	--	--	--	--
Unigene31627_NK	1262	1958	72.9092	gi|327277629|ref|XP_003223566.1|	416.4	1e-114	PREDICTED: CCAAT/enhancer-binding protein delta-like [Anolis carolinensis]
Unigene7968_NK	514	797	72.8659	--	--	--	--
Unigene14120_NK	3011	4668	72.8533	gi|327265526|ref|XP_003217559.1|	509.2	5e-142	PREDICTED: heterogeneous nuclear ribonucleoprotein A/B-like [Anolis carolinensis]
Unigene27236_NK	1330	2061	72.8208	gi|327276873|ref|XP_003223191.1|	646.4	0	PREDICTED: adenosine kinase-like [Anolis carolinensis]
Unigene26459_NK	2356	3648	72.7626	--	--	--	--
Unigene21153_NK	422	653	72.7159	gi|2331059|gb|AAC60281.1|	39.3	2e-09	unknown [Gallus gallus]
CL4110.Contig9_NK	439	679	72.6832	--	--	--	--
Unigene23809_NK	225	348	72.6818	--	--	--	--
CL5533.Contig1_NK	1169	1806	72.5992	gi|390341000|ref|XP_003725351.1|	106.3	3e-21	PREDICTED: uncharacterized protein LOC100892248 [Strongylocentrotus purpuratus]
Unigene15250_NK	2297	3547	72.5653	gi|465973224|gb|EMP33330.1|	1011.5	0	Lysyl-tRNA synthetase, partial [Chelonia mydas]
Unigene27101_NK	486	750	72.5193	--	--	--	--
Unigene6636_NK	2081	3211	72.5099	gi|71897173|ref|NP_001026577.1|	569.7	2e-160	STIP1 homology and U box-containing protein 1 [Gallus gallus] >gi|78099172|sp|Q5ZHY5.1|STUB1_CHICK RecName: Full=STIP1 homology and U box-containing protein 1
Unigene27074_NK	362	558	72.436	gi|465957250|gb|EMP27311.1|	210.7	1e-53	Transmembrane protein 63C [Chelonia mydas]
Unigene28560_NK	1720	2651	72.4286	gi|465958139|gb|EMP27735.1|	695.3	0	Eukaryotic translation initiation factor 4 gamma 1 [Chelonia mydas]
Unigene30875_NK	989	1521	72.2706	--	--	--	--
Unigene62_NK	950	1459	72.1706	gi|327284385|ref|XP_003226918.1|	377.1	7e-103	PREDICTED: vacuolar protein sorting-associated protein 29-like isoform 2 [Anolis carolinensis]
Unigene15506_NK	1283	1969	72.1187	gi|327260792|ref|XP_003215217.1|	55.5	7e-06	PREDICTED: basic leucine zipper and W2 domain-containing protein 1-like [Anolis carolinensis]
Unigene27793_NK	684	1049	72.069	gi|223587758|emb|CAR82249.1|	57.4	6e-07	hypothetical protein [Cotesia congregata]
Unigene28925_NK	210	322	72.0552	--	--	--	--
Unigene29579_NK	1079	1654	72.0349	--	--	--	--
Unigene23697_NK	1688	2586	71.9921	gi|327264786|ref|XP_003217192.1|	891.3	0	PREDICTED: neurogenic locus notch homolog protein 2-like [Anolis carolinensis]
Unigene13671_NK	2905	4445	71.9042	gi|465960469|gb|EMP28886.1|	1177.5	0	NADPH--cytochrome P450 reductase [Chelonia mydas]
Unigene31658_NK	748	1144	71.8709	gi|432948750|ref|XP_004084152.1|	223.8	6e-57	PREDICTED: UPF0368 protein Cxorf26-like [Oryzias latipes]
Unigene31606_NK	2039	3118	71.8601	gi|71897255|ref|NP_001026559.1|	837.8	0	nucleolar protein 56 [Gallus gallus]
Unigene23561_NK	815	1246	71.8438	gi|118575167|sp|Q27J49.1|BNP_LACMU	198.7	2e-49	RecName: Full=Bradykinin-potentiating and C-type natriuretic peptides; AltName: Full=BPP-CNP; Contains: RecName: Full=Bradykinin-potentiating peptide 1; Short=BPP 1; Contains: RecName: Full=Bradykinin-potentiating peptide 2; Short=BPP 2; Contains: RecName: Full=Bradykinin-potentiating peptide 3; Short=BPP 3; Contains: RecName: Full=Bradykinin-potentiating peptide 4; Short=BPP 4; Contains: RecName…
Unigene12550_NK	1005	1532	71.6344	gi|149473178|ref|XP_001511415.1|	230.3	1e-58	PREDICTED: transcription elongation factor B polypeptide 2-like [Ornithorhynchus anatinus]
Unigene23453_NK	5028	7647	71.4702	gi|327287718|ref|XP_003228575.1|	1784.6	0	PREDICTED: alpha-actinin-4-like isoform 1 [Anolis carolinensis]
Unigene831_NK	778	1183	71.4552	--	--	--	--
CL3939.Contig14_NK	1562	2374	71.4214	gi|188501719|gb|ACD54828.1|	414.5	8e-114	MHC class I antigen [Amblyrhynchus cristatus]
Unigene68_NK	1585	2408	71.3931	gi|465958462|gb|EMP27900.1|	35	8e-38	Ubiquitin-conjugating enzyme E2 L3 [Chelonia mydas]
Unigene24580_NK	326	495	71.3537	gi|327289501|ref|XP_003229463.1|	214.5	1e-54	PREDICTED: LOW QUALITY PROTEIN: cadherin-1-like, partial [Anolis carolinensis]
Unigene30208_NK	409	621	71.3505	--	--	--	--
Unigene29436_NK	508	771	71.3213	--	--	--	--
Unigene13678_NK	325	493	71.2841	gi|327284704|ref|XP_003227076.1|	126.7	3e-28	PREDICTED: cytochrome b-c1 complex subunit Rieske, mitochondrial-like [Anolis carolinensis]
Unigene31575_NK	858	1301	71.2556	--	--	--	--
Unigene28461_NK	1913	2899	71.2135	--	--	--	--
CL3521.Contig3_NK	359	544	71.2087	gi|6576738|dbj|BAA88337.1|	116.3	4e-25	ORF2 [Acanthochelys spixii]
Unigene25595_NK	353	534	71.0879	--	--	--	--
Unigene577_NK	933	1411	71.068	gi|354472544|ref|XP_003498498.1|	165.6	3e-39	PREDICTED: 2&apos;-5&apos;-oligoadenylate synthase 1A-like [Cricetulus griseus]
Unigene30932_NK	3175	4801	71.0586	gi|327290118|ref|XP_003229771.1|	328.9	1e-87	PREDICTED: high affinity copper uptake protein 1-like isoform 1 [Anolis carolinensis] >gi|327290120|ref|XP_003229772.1| PREDICTED: high affinity copper uptake protein 1-like isoform 2 [Anolis carolinensis]
Unigene20299_NK	429	648	70.9817	--	--	--	--
Unigene15251_NK	461	695	70.8456	gi|449496874|ref|XP_004176401.1|	152.1	7e-36	PREDICTED: ribonuclease T2 [Taeniopygia guttata]
Unigene24017_NK	1130	1700	70.6967	--	--	--	--
Unigene31603_NK	1910	2872	70.661	gi|327277111|ref|XP_003223309.1|	1031.5	0	PREDICTED: glutamate dehydrogenase 1, mitochondrial-like [Anolis carolinensis]
Unigene20450_NK	1381	2075	70.6079	gi|327272432|ref|XP_003220989.1|	531.6	3e-149	PREDICTED: 3-mercaptopyruvate sulfurtransferase-like isoform 2 [Anolis carolinensis]
Unigene24842_NK	2301	3457	70.6011	gi|327259687|ref|XP_003214667.1|	670.6	0	PREDICTED: lysosomal acid phosphatase-like [Anolis carolinensis]
CL3606.Contig1_NK	2539	3809	70.4981	gi|465952610|gb|EMP24988.1|	75.1	2e-11	Intercellular adhesion molecule 5 [Chelonia mydas]
Unigene20537_NK	1362	2043	70.4888	gi|327284479|ref|XP_003226965.1|	532.3	2e-149	PREDICTED: 26S proteasome non-ATPase regulatory subunit 8-like [Anolis carolinensis]
CL4110.Contig1_NK	870	1304	70.4348	--	--	--	--
Unigene13487_NK	1957	2932	70.4048	gi|348569482|ref|XP_003470527.1|	1119.4	0	PREDICTED: eukaryotic translation initiation factor 3 subunit L-like isoform 1 [Cavia porcellus]
Unigene6707_NK	370	554	70.3618	gi|47223633|emb|CAF99242.1|	84	2e-15	unnamed protein product [Tetraodon nigroviridis]
Unigene24346_NK	871	1304	70.3539	--	--	--	--
Unigene6805_NK	475	711	70.3404	--	--	--	--
Unigene29615_NK	949	1420	70.3155	gi|465952544|gb|EMP24964.1|	184.1	8e-45	Apoptosis-associated speck-like protein containing a CARD [Chelonia mydas]
Unigene6757_NK	570	852	70.2415	gi|327285416|ref|XP_003227429.1|	142.9	8e-33	PREDICTED: NADH dehydrogenase [ubiquinone] iron-sulfur protein 5-like [Anolis carolinensis]
Unigene13917_NK	2960	4417	70.1237	gi|327292114|ref|XP_003230765.1|	781.9	0	PREDICTED: nuclear receptor coactivator 4-like, partial [Anolis carolinensis]
Unigene29301_NK	232	346	70.0837	gi|407263326|ref|XP_003945461.1|	63.5	3e-09	PREDICTED: uncharacterized protein LOC101056242 [Mus musculus]
Unigene20820_NK	2001	2982	70.0309	gi|327261995|ref|XP_003215812.1|	1038.1	0	PREDICTED: t-complex protein 1 subunit alpha-like [Anolis carolinensis]
CL3939.Contig13_NK	1620	2411	69.9377	gi|188501721|gb|ACD54829.1|	418.3	5e-115	MHC class I antigen [Amblyrhynchus cristatus]
Unigene22837_NK	530	788	69.8681	--	--	--	--
Unigene15309_NK	496	737	69.8256	gi|327270908|ref|XP_003220230.1|	339.7	3e-92	PREDICTED: guanine nucleotide-binding protein G(k) subunit alpha-like [Anolis carolinensis]
Unigene6619_NK	851	1264	69.7985	gi|344287504|ref|XP_003415493.1|	54.7	6e-06	PREDICTED: serine/arginine-rich splicing factor 4-like [Loxodonta africana]
Unigene20121_NK	1580	2345	69.7453	gi|17367183|sp|Q9W7L0.3|ENOA_PYTRG	744.6	0	RecName: Full=Alpha-enolase; AltName: Full=2-phospho-D-glycerate hydro-lyase; AltName: Full=Phosphopyruvate hydratase >gi|5305427|gb|AAD41646.1|AF072589_1 alpha enolase [Python regius]
Unigene27784_NK	517	766	69.6253	gi|148229272|ref|NP_001080074.1|	193.4	3e-48	alpha-endosulfine [Xenopus laevis] >gi|82176597|sp|Q7ZXH9.1|ENSA_XENLA RecName: Full=Alpha-endosulfine >gi|27924193|gb|AAH44986.1| Ensa-prov protein [Xenopus laevis]
Unigene6472_NK	277	410	69.5557	--	--	--	--
Unigene20558_NK	442	654	69.5319	gi|465976352|gb|EMP34353.1|	97.8	1e-19	Protein disulfide-isomerase A4 [Chelonia mydas]
Unigene28684_NK	1448	2142	69.5152	--	--	--	--
Unigene14056_NK	2477	3664	69.5118	gi|327277354|ref|XP_003223430.1|	799.3	0	PREDICTED: SLAIN motif-containing protein-like [Anolis carolinensis]
Unigene31576_NK	1895	2803	69.5093	gi|156523130|ref|NP_001095979.1|	523.9	1e-146	surfeit locus protein 4 [Bos taurus] >gi|206557744|sp|A7YY49.1|SURF4_BOVIN RecName: Full=Surfeit locus protein 4 >gi|154426120|gb|AAI51307.1| SURF4 protein [Bos taurus] >gi|296482057|tpg|DAA24172.1| TPA: surfeit 4 [Bos taurus]
Unigene15197_NK	1622	2399	69.5038	gi|327285780|ref|XP_003227610.1|	484.6	6e-135	PREDICTED: palmitoyl-protein thioesterase 1-like [Anolis carolinensis]
Unigene31195_NK	651	961	69.3699	--	--	--	--
Unigene23449_NK	857	1265	69.3647	--	--	--	--
Unigene22938_NK	982	1449	69.3403	gi|327290511|ref|XP_003229966.1|	178.3	5e-43	PREDICTED: RNA-binding protein 14-like [Anolis carolinensis]
Unigene25218_NK	804	1185	69.2614	gi|363743982|ref|XP_424458.3|	281.6	3e-74	PREDICTED: signal peptidase complex catalytic subunit SEC11C [Gallus gallus]
CL35.Contig2_NK	839	1236	69.2286	gi|327288961|ref|XP_003229193.1|	143.7	1e-32	PREDICTED: zinc finger protein 729-like [Anolis carolinensis]
Unigene22937_NK	1144	1685	69.2154	gi|327290511|ref|XP_003229966.1|	477.6	5e-133	PREDICTED: RNA-binding protein 14-like [Anolis carolinensis]
Unigene31677_NK	327	481	69.1236	--	--	--	--
Unigene27443_NK	1026	1509	69.1148	gi|327290256|ref|XP_003229839.1|	120.2	0	PREDICTED: LOW QUALITY PROTEIN: splicing factor 1-like [Anolis carolinensis]
CL3939.Contig1_NK	1341	1972	69.1046	gi|188501733|gb|ACD54835.1|	312.8	2e-83	MHC class I antigen [Conolophus subcristatus]
Unigene14161_NK	297	436	68.9857	gi|471381062|ref|XP_004378324.1|	174.9	1e-42	PREDICTED: elongation factor 1-beta isoform 1 [Trichechus manatus latirostris] >gi|471381064|ref|XP_004378325.1| PREDICTED: elongation factor 1-beta isoform 2 [Trichechus manatus latirostris]
Unigene31254_NK	576	844	68.8571	gi|327261461|ref|XP_003215549.1|	293.5	3e-78	PREDICTED: stromal membrane-associated protein 1-like isoform 2 [Anolis carolinensis]
Unigene25608_NK	877	1285	68.8545	--	--	--	--
Unigene31580_NK	1497	2193	68.8408	gi|449472515|ref|XP_004175034.1|	382.9	2e-104	PREDICTED: CCR4-NOT transcription complex subunit 1 isoform 2 [Taeniopygia guttata]
Unigene31623_NK	455	666	68.7847	gi|327284463|ref|XP_003226957.1|	188.3	9e-47	PREDICTED: c-Myc-binding protein-like [Anolis carolinensis]
Unigene21055_NK	248	363	68.7834	gi|449271150|gb|EMC81698.1|	155.6	6e-37	Annexin A5, partial [Columba livia]
Unigene15229_NK	464	679	68.7671	--	--	--	--
Unigene31671_NK	1003	1467	68.7319	gi|344274687|ref|XP_003409146.1|	382.5	1e-104	PREDICTED: thioredoxin-dependent peroxide reductase, mitochondrial-like isoform 1 [Loxodonta africana]
Unigene29756_NK	1094	1600	68.7277	gi|440911197|gb|ELR60903.1|	441.8	2e-122	Ras-related protein Rab-14, partial [Bos grunniens mutus]
Unigene89_NK	1831	2676	68.6794	gi|300677966|gb|ADK27290.1|	368.2	8e-100	high-mobility-group B1a [Gekko japonicus]
Unigene764_NK	655	957	68.6593	--	--	--	--
Unigene29540_NK	640	935	68.6532	--	--	--	--
Unigene23879_NK	4953	7232	68.615	gi|449278372|gb|EMC86215.1|	1265.8	0	Mannosyl-oligosaccharide 1,2-alpha-mannosidase IB [Columba livia]
Unigene31656_NK	736	1071	68.3818	--	--	--	--
CL202.Contig1_NK	3554	5168	68.3335	gi|327288054|ref|XP_003228743.1|	481.9	1e-133	PREDICTED: cyclin-L1-like [Anolis carolinensis]
Unigene31660_NK	1519	2203	68.1531	gi|327260972|ref|XP_003215306.1|	704.9	0	PREDICTED: nucleotide exchange factor SIL1-like [Anolis carolinensis]
Unigene23783_NK	1212	1757	68.1237	gi|327286578|ref|XP_003228007.1|	107.5	1e-21	PREDICTED: stress-induced-phosphoprotein 1-like [Anolis carolinensis]
Unigene28625_NK	457	662	68.0723	gi|465970308|gb|EMP32310.1|	212.6	4e-54	Putative protein C6orf89 like protein [Chelonia mydas]
CL932.Contig1_NK	330	478	68.068	gi|327280890|ref|XP_003225184.1|	109.8	4e-23	PREDICTED: ig lambda chain V-II region BUR-like [Anolis carolinensis]
Unigene24304_NK	1174	1700	68.0471	gi|45361313|ref|NP_989234.1|	450.3	9e-125	uncharacterized protein LOC394843 [Xenopus (Silurana) tropicalis]
Unigene30854_NK	331	479	68.0043	gi|149463902|ref|XP_001506662.1|	65.1	1e-09	PREDICTED: hypothetical protein LOC100075123, partial [Ornithorhynchus anatinus]
Unigene6597_NK	1065	1538	67.8634	gi|50344916|ref|NP_001002130.1|	331.3	5e-89	mannose-P-dolichol utilization defect 1 protein [Danio rerio] >gi|47937968|gb|AAH71434.1| Mannose-P-dolichol utilization defect 1b [Danio rerio]
Unigene22335_NK	399	576	67.8388	--	--	--	--
Unigene13566_NK	1335	1926	67.796	gi|327260958|ref|XP_003215299.1|	450.3	1e-124	PREDICTED: nucleophosmin-like isoform 2 [Anolis carolinensis]
Unigene20281_NK	1904	2744	67.7245	gi|206205|gb|AAB93667.1|	968.4	0	M2 pyruvate kinase [Rattus norvegicus] >gi|149041863|gb|EDL95704.1| rCG57843, isoform CRA_a [Rattus norvegicus]
Unigene28555_NK	238	343	67.7245	--	--	--	--
Unigene30931_NK	506	729	67.7027	--	--	--	--
Unigene15394_NK	407	586	67.66	--	--	--	--
Unigene6527_NK	263	378	67.5406	--	--	--	--
[truncated: 10,742 more rows]

## Sheet: Mas_unidentified
Malaysian Naja kaouthia Venom Gland Transcriptome Transcript - Unidentified (Updated 1/6/2016)
[truncated: 5,729 more rows]

[truncated: 8 more sheets: Mas_non-toxin, Mas_toxin, Thai_all, Thai_FPKM>10, Thai_unidentified, Thai_non-toxin, Thai_toxin, Mas_Thai redundancy]
