# Supplementary material for: Comparative venom gland transcriptomics of Naja kaouthia (monocled cobra) from Malaysia and Thailand: elucidating geographical venom variation and insights into sequence novelty
Source: PeerJ. 2017 Apr 5;5:e3142. doi: 10.7717/peerj.3142 (PMC5384570; doi:10.7717/peerj.3142)
Supplement: Supplemental Information 2 [file peerj-05-3142-s002.xlsx]

## Sheet: Toxin annotation_sequences
Malaysian Naja kaouthia Venom Gland Transcriptome Toxin Transcripts Annotations (Updated 1/6/2016)
Three finger toxin (3FTx)
ID	Subtype	Protein ID	gene Length	Read	FPKM	A. acid sequence	Accesion	Coverage	Species	A.acid length	ID length	Identified Protein	Coverage	Full sequences
Unigene31433_NKM	L-3FTx	Alpha-elapitoxin-Nk2a	257	33562	6136.82	IRCFITPDITSKDCPNGHVCYTKTWCDAFCSIRGKRVDLGCAATCPTVKTGVDIQCCSTD	gi|128930|sp|P01391	1-71	[Naja kaouthia]	71	71	NKM_FTX01	Full	1
						NCNPFPTRKRP
CL785.Contig2_NKM	L-3FTx	Long neurotoxin-like OH-31	596	6709	528.981	LIVFLLLEPKLDLPNSPGSWWSCRICLCPAWVPLRSRPVTGHSKQCKERG	gi|82193158|sp|Q53B55	13-59	[Ophiophagus hannah]	50	94	NKM_FTX02
CL785.Contig3_NKM	L-3FTx	Long neurotoxin-like OH-31	250	489	91.9174	LDLRNAPESWRSCRICLCPAWVPLRSRPVARQSKECKGIG	gi|82193158|sp|Q53B55	20-59	[Ophiophagus hannah]	40	94	NKM_FTX03
CL785.Contig1_NKM	L-3FTx	Long neurotoxin-like OH-31	263	164	29.3033	LELPNTTENWRSHRTCLCHARVPLRSHPVARQTKQCKEKG	gi|82193158|sp|Q53B55	20-59	[Ophiophagus hannah]	40	94	NKM_FTX04
CL3063.Contig2_NKM	S-3FTx	Cobrotoxin	367	518955	66449.6	LECHNQQSSQTPTTTGCSGGETNCYKKRWRDHRGYRTERGCGCPSVRNGIEINCCTTDRC	gi|46397632|sp|P60770	22-83	[Naja atra]	62	83	NKM_FTX05	Full	2
						NN
CL3063.Contig1_NKM	S-3FTx	Cobrotoxin-c	364	452516	58420	LECHNQQSSQAPTTKTCSGETNCYKKWWSDHRGTIIERGCGCPKVKPGVNLNCCRTDRCN	gi|28380029|sp|P59276	1-61	[Naja kaouthia]	61	61	NKM_FTX06	Full	3
						N
Unigene29220_NKM	S-3FTx	Short neurotoxin SNTX11	375	400973	50247.3	IVCLDLGYAMECYRMSNIVTCQPWEKFCYKEVTMFFPNHPVHLSGCASECTETNSKFCCT	gi|123910516|sp|Q2VBP1	13-77	[Ophiophagus hannah]	65	78	NKM_FTX07	Full	4
						TDKCN
Unigene29219_NKM	S-3FTx	Cobrotoxin-b	504	102548	9561.49	MKTLLLTLVVVTIVCLDLGYTLECHNQQSSQ	gi|6226881|sp|P80958	1-31	[Naja atra]	31	83	NKM_FTX08
Unigene6569_NKM	S-3FTx	Neurotoxin homolog NL1	417	25316	2852.91	LTLVVVTMVCMDLGYTTICYNHLTRTSETTEICPDSWYFCYKISLADGNDVRIKRGCTFT	gi|46397021|sp|Q9DEQ3	6-86	[Naja atra]	81	86	NKM_FTX09	Full	5
						CPELRPTGIYVYCCRRDKCNQ
Unigene29221_NKM	S-3FTx	Cytotoxin 5	837	1956696	109857	MKTLLLTLVVVTIVCLDLGSTLKCNKLIPLAYKTCPAGKNLCYKMFMVSNKTVPVKRGCI	gi|2500802|sp|Q98961	1-81	[Naja atra]	81	81	NKM_FTX10	Full	6
						DVCPKNSLLVKYVCCNTDRCN
CL2753.Contig1_NKM	S-3FTx	Cardiotoxin 7	218	33981	7325.02	DLGYTLKCHNTQLPFIYKTCPEGKNLCFKATLKKFPLKIPIKRGCADNCPKNSALLKYVC	gi|2500805|sp|Q91996	17-83	[Naja atra]	67	83	NKM_FTX11	Full	7
						CSTDKCN
CL5219.Contig1_NKM	S-3FTx	Muscarinic toxin-like protein 2	201	12185	2848.78	LTCVKEKSIFGVTTEDCPDGQNLCFKRWHMIVPGRYKKTRGCAATCPIAENRDVIECCST	gi|12230755|sp|P82463	1-62	[Naja kaouthia]	62	65	NKM_FTX12	Full	8
						DK
Unigene31771_NKM	S-3FTx	Muscarinic toxin-like protein 3 homolog	244	168	32.3555	ILLAACLCIDGGYTIKCYNHLSGTPETIEICPDSQYFCYKSSWIDGGEMEIEKGCVASCP	gi|172048118|sp|A8N286	16-86	[Ophiophagus hannah]	79	86	NKM_FTX13	Full	9
						EFRSSYKSLLCCSTDKCNQ
Unigene29218_NKM	NC-3FTx	Weak tryptophan-containing neurotoxin	851	658499	36362.6	MKTLLLTLVVVTIVCLDLGYTLTCLNCPEMFCGKFQICRNGEKICFKKLHQRRPLSWRYI	gi|311033516|sp|P82935	1-86	[Naja kaouthia]	86	86	NKM_FTX14	Full	10
						RGCADTCPVGKPYEMIECCSTDKCNR
Unigene7145_NKM	NC-3FTx	three finger toxin-like	491	456	43.6428	MRKINLCVLAVLLWSQVVDALVCYHCPNGGRCFTTTTCSSNQDQCMTIWFKGVGFQPPRY	gi|88861958|sp|Q27J50	1-93	[Lachesis muta]	93	93	NKM_FTX15	Full	11
						AKRCGSQYECQLLNSVPQSGVSAICCGFDRCNR
15					350787							15		11
Cysteine-rich secretory proteins (CRISP)
ID	Subtype	Protein ID	gene Length	Read	FPKM	A. acid sequence	Accesion	Coverage	Species	A.acid length	ID length	Identified Protein	Coverage	Full sequences
Unigene29811_NKM		kaouthin-2	312	38600	5813.82	GHYTQIVWYNSHLLGCGAAKCSSSKYLYVCQYCPAGNIIGSIATPYKSGPPCGDCPSACD	gi|197726031|sp|P84808	133-234	[Naja kaouthia]	102	238	NKM_CRP01
						NGLCTNPCTIYNKLTNCDSLLKQSSCQDDWIKSNCPASCFCR
CL3055.Contig1_NKM		kaouthin-2	520	29584	2673.51	GHYTQIVWYNSHLLGCGAAKCSSSKYLYVCQYCPAGNIIGSIATPYKSGPPCGDCPSACD	gi|197726031|sp|P84808	133-238	[Naja kaouthia]	106	238	NKM_CRP02
						NGLCTNPCKHHNVFSNCQSLAKQNACQTEWMKSKCAASCFCRTEII
CL2446.Contig3_NKM		Natrin-1	503	38858	3630.29	SESTRRKKKQKEIVDLHNSLRRRVSPTASNMLKMEWYPEAASNAERWANTCSLNHSPDNL	gi|48428837|sp|Q7T1K6	24-190	[Naja atra]	167	239	NKM_CRP03
						RVLEGIQCGESIYMSSNARTWTEIIHLWHDEYKNFVYGVGANPPGSVTGHYTQIVWYQTY
						RAGCAVSYCPSSAWSYFYVCQYCPSGNFQGKTATPYKLGPPCGDCPS
CL2446.Contig1_NKM		Natrin-1	213	9392	2072.08	MIAFSLLCFAAVLQQSFGNVDFNSESTRRK	gi|48428837|sp|Q7T1K6	1-30	[Naja atra]	30	239	NKM_CRP04
CL2446.Contig2_NKM		Natrin-2	655	29349	2105.62	MIAFIVLLSLAAVLQQSSGTVDFASESSNKRENQKQIVDKHNALRRSVRPTARNMLQMEW	gi|48428841|sp|Q7ZZN8	1-189	[Naja atra]	191	238	NKM_CRP05
						NSNAAQNAKRWADRCSFAHSPPHLRTVGKIGCGENLFMSSQPYAWSRVIQSWYDENKKFV
						YGVGANPPGSVTGHYTQIVWYQTYRAGCAVSYCPSSAWSYFYVCQYCPSGNFQGKTATPY
						KLGPPCGDCPS
5					16295.3							5
Cobra venom factor (CVF)
ID	Subtype	Protein ID	gene Length	Read	FPKM	A. acid sequence	Accesion	Coverage	Species	A.acid length	ID length	Identified Protein	Coverage	Full sequences
Unigene31408_NKM		Cobra venom factor	228	13851	2854.8	IYVMDVLEVIKQGTDKNPRAKTHQYISQRKCQGALNLKVNDDYLIWGSRSDLLPTKDKIS	gi|54035743|sp|Q91132	1539-1613	[Naja kaouthia]	75	1642	NKM_CVF01
						YIITKNTWIERWPHE
Unigene31407_NKM		Cobra venom factor	3400	178076	2461.25	RTNHGDLPRERQAIKSMTATAYQTQGGSGNYLHVAITSTEIKPGDNLPVNFNVRGNANSL	gi|54035743|sp|Q91132	414-1546	[Naja kaouthia]	1133	1642	NKM_CVF02
						NQIKYFTYLILTKGKIFKVGRQPRRDGQNLVTMNLHITPDLIPSFRFVAYYQVGNNEIVA
						DSVWVDVKDTCMGTLVVKGDNLIQMPGAAMKIKLEGDPGARVGLVAVDKAVYVLNDKYKI
						SQAKIWDTIEKSDFGCTAGSGQNNLGVFEDAGLALTTSTNLNTKQRSAAKCPQPANRRRR
						SSVLLLDSKASKAAEFQDQDLSKCCEDVMHENPMGYTCEKRAKYIQEGDACKAAFLECCR
						YIKGVRDENQRESELFLARDDNEDGFIADSDIISRSDFPESWLWLTKDLTEEPNSQGISS
						KTMSFYLRDSITTWVVLAVSFTPTKGICVAEPYEIRVMKVFFIDLQMPYSVVKNEQVEIR
						AILHNYVNEDIYVRVELLYNPAFCSASTKGQRYQQQFPIKALSSRAVPFVIVPLEQGLHD
						VEIKASVQEALWSDGVRKKLKVVPEGVQKSIVTIIKLDPRAKGVGGTQLEVIKARKLDDR
						VPDTEIKTKIIIQGDPVAQIIENSIDGSKLNHLIITPSGCGEQNMIRMAAPVIATYYLDT
						AEQWETLGINRRTEAVNQIMTGYAQQMVYKKADHSYAAFTNRASSSWLTAYVVKVFAMAA
						KMVAGISHEIICGGVRWLILNRQQPDGAFKENAPVLSGTMQGGIQGEEEEVYLTAFILVA
						LLESKTICNDYVNSLDSSIKKATNYLLKKYEKLQRPYTTALTAYALAAADQLNDDRVLMA
						ASTGRDHWEEYNAHTHNIEGTSYALLALLKMKKFDQTGPIVRWLTDQNFYGGTYGQTQAT
						VMAFQALAEYEIQMPTHQDLNLDITIELPDREVPIRYRINYENALLARTVETKLNQDFTV
						TASGDGKATMTILTFYNAQLQEKANVCNKFHLNVSVENIHLNAMGAKGALMLKICTRYLG
						EVDSTMTIIDISMLTGFLPDAEDLTRLSKGVDRYISRYEVDNNMAQKVAVIIYLNKVSHS
						EDECLQFKILKHFEVGFIQPGSVKVYSYYNLDEKCTKFYHPDKGTGLLNKICVGNVCRCA
						GETCSSLNHQERIDVPLQIEKACETNVDYVYKTKLLRIEEQDGNDIYVMDVLE
Unigene31409_NKM		Cobra venom factor	1310	54315	1948.4	MERMALYLVAALLIGFPGSSHGALYTLITPAVLRTDTEEQILVEAHGDNTPKQLDIFVHD	gi|54035743|sp|Q91132	1-421	[Naja kaouthia]	421	1642	NKM_CVF03
						FPRKQKTLFQTRVDMNPAGGMLVTPTIEIPANEMSTDSRQNQYVVVQVTGPQVRLEKVVL
						LSYQSSFLFIQTDKGIYTPGSPVLYRVFSMDHNTSKMNKTVIVEFQTPEGILVSSNSVDL
						NFFWPYNLPDLVSLGTWRIVAKYEHSPENYTAYFDVRKYVLPSFEVRLQPSEKFFYIDGN
						ENFHVSITARYLYGKKVEGVAFVLFGVKIDDAKKSIPDSLTRIPIIDGDGKATLKRDTFR
						SRFPNLSELVGHTLYASVTVMTESGSDMVVSEQSGIHIVTSPYQIHFTKTPKYFKPGMPY
						ELTVYVTNPDGLPAAKVPVVSEAFHSEGTTLSDGTTKLILNIPSNAQSQPITVRTNHGDL
						P
Unigene31410_NKM		Cobra venom factor	551	18402	1569.43	ECQEEEFQKLCDDFAQFSYTLTEFGCPT	gi|54035743|sp|Q91132	1615-1642	[Naja kaouthia]	28	1642	NKM_CVF04
4					8833.87							4
Phospholipase A2 (PLA2)
ID	Subtype	Protein ID	gene Length	Read	FPKM	A. acid sequence	Accesion	Coverage	Species	A.acid length	ID length	Identified Protein	Coverage	Full sequences
CL5128.Contig2_NKM		Acidic phospholipase A2 1	1725	265455	7231.54	MNPAHLLILAAVCVSPLGAFSNRPMPLNLYQFKNMIQCTVPSRSWWDFADYGCYCGRGGS	gi|24638468|sp|P00596	1-146	[Naja kaouthia]	146	146	NKM_PLA01	Full	12
						GTPVDDLDRCCQVHDNCYNEAEKISRCWPYFKTYSYECSQGTLTCKGDNDACAAAVCDCD
						RLAAICFAGAPYNNNNYNIDLKARCQ
CL5128.Contig1_NKM		Phospholipase A2 GL16-1	231	246	50.044	GSGTPVDQLDRCCQTHDNCYSQAKKHPACKPLLDSPYIKTYSYTCSGGNLICKDHNDECG	gi|25453145|sp|Q8JFB2	60-135	[Laticauda semifasciata]	76	152	NKM_PLA02
						AFICNCDRSAAICFAG
2					7281.58							2		1
Snake venom metalloproteinase (SVMP)
ID	Subtype	Protein ID	gene Length	Read	FPKM	A. acid sequence	Accesion	Coverage	Species	A.acid length	ID length	Identified Protein	Coverage	Full sequences
CL2051.Contig1_NKM	P-III	Zinc metalloproteinase-disintegrin atragin	1368	69593	2390.61	MIQALLVTICLVVFPYQGSSIILESGNVNDYEVVYPQKVPGLPKGRVQNPQPETKYEDTM	gi|391359383|sp|D3TTC2	1-417	[Naja atra]	417	613	NKM_SMP01
						QYEFQVNGEPVVLHLERNKGLFSEDYTETHYAPDGREITTSPPVQDHCYYHGYIQNEADS
						SAVISACNGLKGHFKHQGETYFIEPLKISNSEAHAIYKDENVENEDETPEICGVTETTWE
						SDESIEKTSQLTNTPEQDRYLQAEKYIEFYVIVDNRMYRYYNYDKPAIKIRVYEMINAVN
						TKFRPLKIHIALIGLEIWSNEDKFEVKPAASVTLKSFREWRQTVLLPRKRNDNAQLLTGI
						DFNGTPVGLAYIGSICNPKTSAAVVQDYSKSTRMVAITMAHEMGHNLGMNHDKGFCTCGF
						NKCVMSTRRTKPAYQFSSCSVREHQEYLLRERPQCILNKPLSTDIVTPPVCGNYFVE
Unigene31353_NKM	P-III	Zinc metalloproteinase-disintegrin atragin	749	27943	1753.15	CPIMTNQCIALRGPGVKVSRDSCFTLNQRTRGCGLCRMEYGRKIPCAAKDVKCGRLFCKR	gi|391359383|sp|D3TTC2	510-613	[Naja atra]	104	613	NKM_SMP02
						RNSMICNCSISPRDPNYGMVEPGTKCGDGMVCSNRQCVDVKTAY
CL1005.Contig2_NKM	P-III	Hemorrhagic metalloproteinase-disintegrin kaouthiagin	1013	20539	952.793	STDIVSPAICGNYFVEEGEECDCGSPAACQSACCDAATCKFNGAGAECRAAKHDCDLPEL	gi|32469675|sp|P82942	210-401	[Naja kaouthia]	192	401	NKM_SMP03
						CTGQSAECPTDSLQRNGHPCQNNQGYCYNGTCPTLTNQCIALLGPHFTVSPKGCFDLNMR
						GDDGSFCRMEDGTKIPCAAKDVKCGRLYCTEKNTMSCLIPPNPDGIMAEPGTKCGDGMVC
						SKGQCVDVQTAY
CL1005.Contig1_NKM	P-III	Hemorrhagic metalloproteinase-disintegrin kaouthiagin	1064	20467	903.944	STDIVSPAICGNYFVEEGEECDCGSPADCQSACCNATTCKLQHEAQCDSEECCEKCKFKG	gi|32469675|sp|P82942	210-401	[Naja kaouthia]	201	401	NKM_SMP04
						AGAECRAAKHDCDLPELCTGQSAECPTDSLQRNGHPCQNNQGYCYNGKCPTLTNQCIALL
						GPHFTVSPKGCFDLNMRGDDGSFCRMEDGTKIPCAAKDVKCGRLYCTEKNTMSCLIPPNP
						DGIMAEPGTKCGDGMVCSKGQCVDVQTAY
CL5605.Contig1_NKM	P-III	Hemorrhagic metalloproteinase-disintegrin kaouthiagin	1573	9998	298.685	TLSGICLGFSLPVADFTVSPKGCFDLNMRGDDGSFCRMEDGTKIPCAAKDVKCGRLYCTE	gi|32469675|sp|P82942	303-401	[Naja kaouthia]	101	401	NKM_SMP05
						KNTMSCLIPPNPDGIMAEPGTKCGDGMVCSKGQCVDVQTAY
CL2051.Contig3_NKM	P-III	carinatease-1	279	1181	198.918	KTSQLTNTAEQDRYLQVEKYIEFYVVVDNKMYRNYNNKKRAIKRRVYKMVNYLNMKFRPL	gi|145982754|sp|B5KFV1	182-274	[Tropidechis carinatus]	93	608	NKM_SMP06
						NIHIALIGLEIWSNQDQINLQPTASVTLDLFGE
Unigene30254_NKM	P-III	carinatease-1	525	382	34.1927	KTSQLTNTAEQDRYLQVEKYIEFYVVVDNKMYRNYNNKKRAIKRRVYKMVNYLNMV	gi|145982754|sp|B5KFV1	186-237	[Tropidechis carinatus]	56	608	NKM_SMP06
7					6532.29							6
Nerve growth factor (NGF)
ID	Subtype	Protein ID	gene Length	Read	FPKM	A. acid sequence	Accesion	Coverage	Species	A.acid length	ID length	Identified Protein	Coverage	Full sequences
CL1038.Contig1_NKM		nerve growth factor beta chain	886	79047	4192.57	MVHSVMSMLCYTLIIAFLIGIWAAPKSEDNVPLGSPATSDLSDTSCAQTHEGLKTSRNTD	gi|11275218|pir|A59218	1-246	monocled cobra	246	246	NKM_NGF01	Full	13
						QHHPAPQKAEDQELRTAANIIVDPKLFQKRQFQSPRVLFSTQPPLLSRDEESVEFLDNED
						SLNRNIRAKREDHPVHNLGEHSVCDSVSAWVTKTTATDIKGNTVTVMENVNLDNKVYKQY
						FFETKCKNPNPEPSGCRGIDSSHWNSYCTETDTFIKALTMEGNQASWRFIRIETACVCVI
						TKKKGN
1					4192.57							1		1
Kunitz-type serine protease inhibitor (KSPI)
ID	Subtype	Protein ID	gene Length	Read	FPKM	A. acid sequence	Accesion	Coverage	Species	A.acid length	ID length	Identified Protein	Coverage	Full sequences
CL3495.Contig1_NKM		Protease inhibitor	890	46665	2463.94	RPRFCELPAAKGLCNAYKPAFYYNKDSHRCQKFIYGGCGGNANRFRTIDECNRTCVG	gi|125050|sp|P20229	1-57	[Naja naja]	57	57	NKM_KPI01	Full	14
Unigene777_NKM		Kunitz-type protease inhibitor 1	3984	7306	86.1766	MGRSRSQLQAGLLVTWFFLAGLVLGQEQNGEGASFGETCLAQFTPGFPEFVLDTNASVEN	gi|565300423|sp|V8N7R6	1-506	[Ophiophagus hannah]	513	506	NKM_KPI02	Full	15
						GATFLASPPVGSSRDCVRACCKNPDCNLALVEQSPGEDSNGIQSCFLLDCLYDQALVCRF
						AKKDGFLNYVRREVYNAYATMRNLGNRDDLPPKAKAWMDVKVQPKDEPVILNGSESTDDN
						GIVNYEWTLLSGDSSVVMEKENDIMKLSNLNEGIYVFQFTVTDTADQQHSINITVTVLNS
						DHTVDHCLAPYKVGRCRGSFHRWYYNPEIGQCQGFIFGGCNPNKNNYVRKEECDLACKNV
						QGAVEKRQEPTCNGNCLPLHFKCEDGCCIDRALECDETPDCQDGSDEKSCDSYIQGFDKL
						QKINTSAKSYCVDMPDTGPCEESIPRWYYNPSTEKCGRFTYGGCEGNKNNFEQEETCMKS
						CRGITKQHMIDQRWRGYEYQQASLSAFEVAIAVLLCVCILIALVVLGYFFLKNRKTYRRR
						RQPPTAANSTLSSVLSTAEDTEHLVYNSTTKPI
2					2550.12							2		2
Natriuretic peptide (NP)
ID	Subtype	Protein ID	gene Length	Read	FPKM	A. acid sequence	Accesion	Coverage	Species	A.acid length	ID length	Identified Protein	Coverage	Full sequences
Unigene31072_NKM		Natriuretic peptide Na-NP	590	26082	2077.39	KPPTGLRTSLAALRILGYLRPDSKQSRAARDRMLHPEQQVGGGG	gi|317412168|sp|D9IX97	34-77	[Naja atra]	44	165	NKM_NP01
CL4576.Contig1_NKM		Natriuretic peptide Na-NP	1515	3727	115.605	QPPPPPPTAPAALRIIWDLRPNSKQSRATRDQVVHPEPHAGGGSGRDPR	gi|317412168|sp|D9IX97	115-163	[Naja atra]	49	165	NKM_NP02
2					2192.99							2
Neprilysin
ID	Subtype	Protein ID	gene Length	Read	FPKM	A. acid sequence	Accesion	Coverage	Species	A.acid length	ID length	Identified Protein	Coverage	Full sequences
Unigene27155_NKM		neprilysin-like	662	9004	639.155	MTNISEWPIAADNWDLNHGSTWSAEESIAELNFQFGRKVIINMFVGTDDKNSLQHILHVD	gi|602662603|XP_007436944	161-380	[Python bivittatus]	220	750	NKM_NEP01
						QPRLGLPSRDYYECTGLYTEACSAYISFMTSVAKLIRQERKLSINDTEISTEVERIMALE
						KEIASITTKDEDRNDPLLLYHKMKLSDLQKNFSFEINNQTFDWLKFVNYIMKTVAIEVKN
						TEDIIVYAPEYLIKLKSVICNYTAREIQNYISWRYIMDMV
Unigene27154_NKM		neprilysin-like	1125	10138	423.476	MAKSESQMDITEMNSPKPKRKLRWSPLEIGLAAVVLLLAVVAITMIILYATYDDGICKTS	gi|602662603|XP_007436944	1-168	[Python bivittatus]	168	750	NKM_NEP02
						DCIKSAARIIENMDTAAEPCNNFYQYACGGWLKKHIIPETSSRYSNFDILRDELEVVLKD
						VLEKKESNDIEAVAKAKMLYRSCINETAINSKKGKPLINLMTNISEWP
Unigene27153_NKM		neprilysin-like	4117	37013	422.476	RYIMDMVSSLSRDYKDTRNNFRKVLYGTTSDAAIWRRCANYVNSIMGNAVGRLYVQEAFA	gi|602662603|XP_007436944	374-750	[Python bivittatus]	377	750	NKM_NEP03
						GESKHVVQEMITQIREVFIKTLEELSWMDAETKKKAEDKAVAIKERIGYPDEILTNTEKL
						NKEYQGLTYKEEEYFENLIENLRFAQKERLKKLREKVDKDEWITGAAVVNAFYSPSRNQI
						VFPAGILQPPFFSASQPKSLNFGGIGMVIGHEITHGFDDNGRNFNAEGDLIDWWSQESAN
						NFKSQSQCMIYQYGNFSWDLAAGQNLSGINTLGENIADNGGIRQAYRAYESYVQKNGEEK
						RLPGLDLNHKQLFFLNFAQVWCGTYRPEYAVNSIKTDVHSPGKFRVLGSLQNNLEFSEAF
						KCTDKDYMDPVKKCRVW
3					1485.11							3
Snake venom C-type lectin/lectin-like protein (snaclec)
ID	Subtype	Protein ID	gene Length	Read	FPKM	A. acid sequence	Accesion	Coverage	Species	A.acid length	ID length	Identified Protein	Coverage	Full sequences
Unigene514_NKM		C-type lectin BFL-1	855	20995	1153.93	MGHFTFTSLCLLAVFLSLSGAEGYNCPLDWLPKNGLCYKVFSTPKSWLKAEMHCRKFKPG	gi|75570172|sp|Q90WI8	1-158	[Bungarus fasciatus]	158	158	NKM_SCL01	Full	16
						CHLASLHSNSDAVEFSEYISDYLTGQGHVWIGLRDRTKKYIWEWTDRSKTDFLQWKKKQP
						DHFKNNEFCVEIVKFTGYLQWNDENCAALRPFLCQCKY
Unigene821_NKM		C-type lectin BFL-2	603	825	64.2933	FLSLSGAECYNCPIDWLSRNGLCYKLFNTPKSWLDAEMFCRKFKPGCHLVSIHSVAESAD	gi|75570171|sp|Q90WI7	15-158	[Bungarus fasciatus]	144	158	NKM_SCL02	Full	17
						LAEYVSDYLQGDGFVWIGLNDPRKQRIWEWSDRSSTNYFSWNQGEPNNSKNKEYCVHLWS
						PTAYRKWNDTPCESLYPFICQCKF
Unigene7575_NKM		venom C-type lectin mannose binding isoform 2 variant 1	380	82	10.1405	LAEYVSDYLTSGGNVWIGLNDPRRQRNWQWTDRSRNSYLTWKQGEPNNLHNNENCVELWS	gi|145699639|sp|D2YVL4	75-158	[Cryptophis nigrescens]	84	158	NKM_SCL03
						QSGYRNWNDENCASARAYLCKCRF
Unigene7574_NKM		C-type lectin isoform 3	347	74	10.0215	MGRFLFVTLGLLVVAFSLNGANSCCCPRDWFSMNGFCYKVFNDRKNWNDAETFCRKHKPG	gi|262479390|sp|H8PG91	1-111	[Suta nigriceps]	80	186	NKM_SCL04
						CHLASIHGSEESTDLAEYVS
4					1238.38							4		2
Cystatin
ID	Subtype	Protein ID	gene Length	Read	FPKM	A. acid sequence	Accesion	Coverage	Species	A.acid length	ID length	Identified Protein	Coverage	Full sequences
Unigene864_NKM		hypothetical protein L345_15265	1009	12521	583.145	MGRSQLPLPSLLSLFSALLMLSPQLLRVNAQDLYDAPINHPYVQKALAFAVERYNLDNEE	gi|565302450|sp|V8NBS6	1-74	[Ophiophagus hannah]	142	84	NKM_CYS01	Full	18
						SANYFKVMQVLKTQWKMSNRVEYHLTVELVKTKCKKEIGKIKQYKKIQECKVLQGNHKRP
						NCHFAVVPHPLPIEMNVEVSVC
Unigene14260_NKM		cystatin	816	1532	88.2262	MVHFQLPVAAPLCLLCALLLLPSATMIPGGLSPRSVSDPDVQKAAAFAVQEYNARSANAH	gi|239618555|sp|E3P6P4	1-141	[Naja kaouthia]	141	141	NKM_CYS02	Full	19
						YYKELRVVEAQSQVVAGEKYYLMMELVKTKCAKTAGKPKVYKEIQNCELPPKAQQEKLTC
						HFQVWSRPWLDKTELTKMSCN
Unigene13582_NKM		Cystatin-C	1245	1663	62.77	MALLRGLLVCSVLLLSCICKQALGTRLIGGREDASPEEPGVRAALQFAMNEYNRGSNDMY	gi|565314548|sp|V8NX38	36-170	[Ophiophagus hannah]	135	171	NKM_CYS03
						ASRVSEVVQVQKQIVSGIKYYFTVKIGRTVCRKESSDLENCAFHSTPKLAQTMTCIFEVY
						NIPWRNSISLLKSSC
Unigene20695_NKM		hypothetical protein L345_15526	919	362	18.5107	EQAITHFNRGNEGSYYKHLEDGQLEFQEAIGVMVYVKMLLAKTNCTRTKEQEEAGVEYSR	gi|565301856|sp|V8NB07	152-223	[Ophiophagus hannah]	102	234	NKM_CYS04
						AYLEKEGCQLPPKFQQEKHNCTFGIFINMRTEKKAVISQECS
4					752.652							4		2
L-amino-acid oxidase (LAAO)
ID	Subtype	Protein ID	gene Length	Read	FPKM	A. acid sequence	Accesion	Coverage	Species	A.acid length	ID length	Identified Protein	Coverage	Full sequences
CL817.Contig1_NKM		L-amino-acid oxidase	2442	24953	480.182	MNVFFIFSLLFLAALESCADDRRSPLEECFQQNDYEEFLEIARNGLKKTSNPKHVVVVGA	gi|347602454|sp|A8QL58	1-449	[Naja atra]	514	449	NKM_LAO01	Full	20
						GMAGLSAAYVLAGAGHKVTLLEASERVGGRVVTYHNDREGWYVNMGPMRLPERHRIVREY
						IRKFGLQLNEFFQENENAWYYINNIRKRVWEVKKDPSLLKYPVKPSEEGKSASQLYQESL
						TKVIEELKRTNCSYILNKYDSYSTKEYLIKEGNLSRGAVDMIGDLLNEDSSYHLSFIESL
						KSDALFSYEKRFDEIVGGFDQLPISMYQAIAETVHLNARVIKIQYDAEKVRVTYQTPAKT
						FVTADYVIVCSTSRAARRIYFEPPLPPKKAHALRSIHYRSATKIFLTCSKKFWEADGIHG
						GKSTTDLPSRFIHYPNHNFTTGIGVIMAYVLADDSDFFQALDTKTCADIVINDLSLIHDL
						PKREIQALCYPSIKKWNLDKYTMGSITSFTPYQFQDYFESAAAPVGRIHFAGEYTGRFHG
						WIDSTIMTGLRAARDVNRASQKPSKIRLISDNQL
1					480.182							1		1
Vespryn
ID	Subtype	Protein ID	gene Length	Read	FPKM	A. acid sequence	Accesion	Coverage	Species	A.acid length	ID length	Identified Protein	Coverage	Full sequences
Unigene28525_NKM		Thaicobrin	1631	16481	474.852	MLLFTLCLFADQENGGKALASPPGNWQKADVTFDSNTAFESLVVSPDKKTVENVGVSQVA	gi|32363235|sp|P82885	1-108	[Naja kaouthia]	190	108	NKM_VES01	Full	21
						PDNPERFDGSPCVLGSPGFRSGKHFFEVKYGTQREWAVGLAGKSVKRKGYLRLVPEERIW
						QKGLWWLGRLETDSDKLQKSSGKIIVFLDYDKGKVIFDLDGKVTTLQASFNGEEVVPFYY
						LGASVSLTNL
1					474.852							1		1
Phosphodiesterase (PDE)
ID	Subtype	Protein ID	gene Length	Read	FPKM	A. acid sequence	Accesion	Coverage	Species	A.acid length	ID length	Identified Protein	Coverage	Full sequences
CL196.Contig5_NKM		phosphodiesterase	3389	30885	428.257	KKVLFISLVAVALGLGLGLGLKQSKQPLESCRNRCNETFSEELSYCSCDNKCTERKACCW	gi|537444868|sp|U3FAB3	4-853	[Micrurus fulvius]	850	853	NKM_PDE01	Full	22
						DYQDTCVLPTQSWSCNKLRCGEKRMANVLCSCSEDCLTKKDCCTDYKSICKRETSWLKDQ
						CASSSASQCPEGFDQSPLILFSMDGFRAEYLETWDTLMPNINKLKTCGTHAKYMRAVYPT
						KTFVNHYTIVTGLYAETHGIIDNNMYDVKLNQNFSLSGSNMRNAAWWGGQPIWHTASYQG
						LKAATYFWPGSEVKINGSYPTIYKVYNKSTPFEARVMEVLKWLDLPKAKRPDFSTLYIEE
						PDTTGHKFGPVSGQVIKSLQMADRTLGMLMEGLKQRNLHNCVNLILLADHGMEAISCNRL
						EYMTDYFNTVDFFMYEGAAPRIRSKNVPKDFYTFDSEAIVKKLTCRKPKQHFKAYLAKDL
						PKRLHFANNIRIDKVNLMVDRQWLAVRNKKYKYCSGGTHGYDNEFKSMEAIFLAHGPGFK
						EKTEVTSFENIEVYNLMCDLLKLKPAPNNGTHGSLNHLLKNPFYNPSPAKEQSPPLYCLF
						GPVPSPDVSGCKCSSITDLEAVNQRLNLIDQAKMQSEADNLPYGRPHVLQHSKYCLLHQT
						KYISAYSQDILMPLWNSYTISKSLVKPTSAPPSASDCLRLDVRIPTVQSQTCSNYQPDLA
						ITPGFLYPPDFSSSGPEQYDALITSNIVPMYKEFARLWNYFHSTLLPKYATERNGLNVIS
						GPIFDYNYDGHFDPYDTIDQYVNNTKIPIPTHYFVVLTSCENSTKTPLNCPPGSLKVLSF
						ILPHRPDNSESCADKSPDNLWVEERMQTHTARVRDVELLTGLDFYSALKQPLSETLRLKT
						FLPIFINSVN
Unigene30820_NKM		phosphodiesterase	1281	988	36.244	TGLWNYFHSTLLPKYATERNGLNVISGPIFDYNYDGHFDPYDTIDQYVNNTKIPIPTHYF	gi|537444868|sp|U3FAB3	695-853	[Micrurus fulvius]	156	853	NKM_PDE02
						VVLTSCENSTKTPLNCPPGSLKVLSFILPHRPDNSESCADKSPDNLWVEERMQTHTARVR
						DVELLTGLDFYSALKQPLSETLRLKTFLPIFINSVN
2					464.501							2		1
Aminopeptidase (AP)
ID	Subtype	Protein ID	gene Length	Read	FPKM	A. acid sequence	Accesion	Coverage	Species	A.acid length	ID length	Identified Protein	Coverage	Full sequences
Unigene30142_NKM		aminopeptidase N	1485	2654	83.9853	IMDRWTLQMGFPVLTVNTTTGTITQKHFLLDPESPVERPSQFNYIWIVPVSWLSTGREAE	gi|211926750|sp|B6EWW5	560-988	[Gloydius brevicaudus]	429	989	NKM_AP01
						MYWLTETSAQNANFSISADPAQWLLLNINVVGYFRVNYDLANWKKLMSQLNVDLQKIPVL
						NRAQIIDDAFNLARAKYVGTDLALTTTRYLAQEREYLPWDTALDNLDYFRLMFDRSEVYG
						PMQKYIRKQVTPLFDHFGNVTHNWTKIPDDLMNQYNQILAIRTACFYDVPECNELASSWF
						EAWKANSTVNRIPPNLRSAIYCSAIRTGGQEAWDFVWMMFLQPQVISEADRLRSALTCSQ
						VPWLLQRYLQYTLNSSLIRRQDATSTINSIASNVVGQSLAWDFVRMNWRTLFQQFGGSSF
						SFSSLIQSVTKRFASPFELQQLEQFKKDNADVGFGSATRALEQALERTKANIKWVAENKP
						LVLQWFEDN
Unigene23800_NKM		aminopeptidase B	1812	608	15.7679	MAARDAATACSADSFQLRHLHLSLRVDFEAAGAGHLRGSVRLELTCLRDGVSEIVLDSHP	gi|565300811|sp|V8N861	1-522	[Ophiophagus hannah]	589	567	NKM_AP02
						SVEVESAGLAPPKSRRGEEKGQEPGALRPVSFQNRPFASYGSALHVSLPEPLTCGDAVVL
						EIAYRAGGGPGVCWLMPEQTAGKQKPYMYTQGQAVLNRSVFPCFDTPAVKSSYSAIIKVP
						EGFTAVMSAVTREKQKGNTFLFEMPHPIPSYLVALVVGDIVSAEVGPRSHVWAEPCLIEA
						AKKEYDGVIEEFLTTGEKIFGPYVWERYDVLFMPPSFPFGGMENPCITFVTPCLLAGDRS
						LADVIIHEISHSWFGNLVTNAHWGEFWLNEGFTMYAQRRISAALYGAAYTSLEAATGRAL
						LRQHMDNVGEEHPLNKLRVQIEPGVDPEDTYNETPYEKGYCFVSYLAHLVGDQTKFDAFL
						QAYVNQFKFQSITADDALNFYLTYFPELKKRGVDTIPGFEFDRWLNTPGWPPYLPDLSPG
						EELMKPAEKLAELWAFSDHNMEAIRALDISAWKTYQLIYFLDNILKKSPLPDGHVEKMSI
						LYPKISKAQNAELRLRWSQIVLKNNYEAGFDQVKDFLHSQGKQKYTLPI
2					99.7532							2
Snake venom serine protease (SVSP)
ID	Subtype	Protein ID	gene Length	Read	FPKM	A. acid sequence	Accesion	Coverage	Species	A.acid length	ID length	Identified Protein	Coverage	Full sequences
CL861.Contig1_NKM		Serine protease harobin	1236	3209	122.006	MALIGVLANLLILQLSYAIIPFDRIIGGFECNEHEHRSLVYLYNSAGFFCAGTLLNHEWV	gi|82232159|sp|Q5MCS0	1-265	[Lapemis hardwickii]	256	265	NKM_SSP01	Full	23
						LTAAHCNREDIRIKLGVHNVHVHYEDEQIRVPKEKLCCLSTNNCTQLSQDIMLIRLNSSV
						NYSEHIAPLSLPSNAPRMGSFCRVMGWGLTTSPEVIYPKVPHCVDINILHIPVCQAAYPA
						MPKKNVLCAGILEGEKDSCQGDSGGPLICNGQIQGTVSWGRFPCAQLLEPGVYTKVFDYT
						KWIKGIIAGNTNVICP
1					122.006							1		1
Waprin
ID	Subtype	Protein ID	gene Length	Read	FPKM	A. acid sequence	Accesion	Coverage	Species	A.acid length	ID length	Identified Protein	Coverage	Full sequences
CL3529.Contig3_NKM		Scuwaprin-a	359	261	34.1645	LLLLLGLLTLLAEMPPSMGQAEKPGSCPKLPPGRITICTLYCRYDWQCPRREKCCTYGCT	gi|239977681|sp|B5G6G8	6-72	[Oxyuranus scutellatus]	67	75	NKM_WAP01	Full	24
						AVCKDPV
1					34.1645							1		1
Phospholipase B (PLB)
ID	Subtype	Protein ID	gene Length	Read	FPKM	A. acid sequence	Accesion	Coverage	Species	A.acid length	ID length	Identified Protein	Coverage	Full sequences
CL2411.Contig1_NKM		Putative phospholipase B 81b	1892	1280	31.792	MVRFGSASSSDNRRQRRWSWYCGGLLLLWAVTETRADVHYATVYWLKAEKSFQIKDLLDR	gi|449061871|sp|F8J2D3	1-553	[Drysdalia coronoides]	553	553	NKM_PLB01	Full	25
						NGDAYGYYNDTVQSTGWGILEIKAGYGSQLVSNEILMYAAGFLEGYLTASHMSDHITNLY
						HQLIKNVIIEQKVKDFMQKQDEWTRQQIKNNKDDPFWRNAGYIIAQLDGLYMGNLEWAKR
						HKRTPLTEFEVSFLNAIGDLLDVIPALSPESRNNDFLSMSEVSNMYQWDMGHCSALIKVL
						PGYENIYFAHSSWFTYAATLRIFKHWDFRITDPQTKTGRASFSSYPGLLISLDDFYMLGS
						GLIMLQTTNSVFNLSLLKQVVPESLLAWERVRIANMMADSGKTWAQTFEKQNSGTYNNQY
						MILDTKKIKLRRSIEDGTLYIIEQVPNLVEYSDQTTILRKGYWPSYNIPFHNAIYNMSGY
						REYVQKYGLDFSYEMAPRAKIFRRDQGKVTDIESMKHIMRYNNYKKDPYAKHNPCNTICC
						RQDLNYKTPVPAGCYDSKVADINMAAKFTVYAINGPPVEKGLPIFSWVHFNKTTHQGLPE
						SYNFDFVTMKPVL
1					31.792							1		1
5' nucleotidase (5'NUC)
ID	Subtype	Protein ID	gene Length	Read	FPKM	A. acid sequence	Accesion	Coverage	Species	A.acid length	ID length	Identified Protein	Coverage	Full sequences
Unigene23440_NKM		5&apos; nucleotidase	607	209	16.1803	KSKKRQGWRTFLVIPELAQELHVWTDKSCLFEELQSLDIFLAELYKHLDSSSNERPDISS	gi|118151736|sp|A6MFL8	359-559	[Demansia vestigiata]	201	559	NKM_NUC01
						IQRRIKKVTHDMDMCYGMMGSLFRSGSRQTLFASQVMRYADLYAASFINLLYYPFSYLFR
						AAHVLMPHESTVEHTHVDINEIESPMATRNRTSVDFKDSDKRHQLTRSVSEIKPPNLFPQ
						TPQEITHCHDEDDDEEEEEEE
Unigene30350_NKM		Snake venom 5&apos;-nucleotidase	1695	371	10.2857	DPAVKAEISRMKVQLQNYSSQEIGRTIVYLNGTTHACRFHECNLGNLICDAVVYNNLRHP	gi|395455150|sp|F8S0Z7	331-569	[Crotalus adamanteus]	239	588	NKM_NUC02
						DDNEWNHVSMCIVNGGAIRSPIDEQANNGIITLEELTAVLPFGGTFDLLQIKGSTLRQAF
						EHSVHRHGQGTGELLQVSGIKVVYDLSQKPGKRVVSLNVLCTECRVPTYVPLEMEKTYKV
						LLPSFLAAGGDGYYMLKGDSSNHSSGDLDISIVGNYIKRMGKVFPAMEGRMVFSAGTLF
2					26.466							2
Dipeptidylpeptidase IV (DPP IV)
ID	Subtype	Protein ID	gene Length	Read	FPKM	A. acid sequence	Accesion	Coverage	Species	A.acid length	ID length	Identified Protein	Coverage	Full sequences
Unigene23250_NKM		venom dipeptidylpeptidase IV	2641	2127	37.8467	MKTVLKCLLGLLALGVIITAIVVPIVLLTRDDTDTRRKFTLEDYLNNDFQYKSYNVRWMS	gi|148372359|sp|A6MJH7	1-753	[Pseudechis australis]	753	753	NKM_DPP01	Full	26
						GHEYVYTNQNNVFLYNIDDGKESIILSNNTLEDWNNSVAILSPDKKFALLRYNYEKVWRH
						SYTASYHIYDLNNRTIITENPLPETIQYISWSPAGHKLAYVYSNNIYVKTTPNAKPVEIT
						ENGAENKILNGLSDWVYEEEMFGTHCALWWSPNGSFLAFAEINDTEVPLIEYSFYSEDTL
						QYPKTIKIPYPKAGAINPTIRLFVVNILALPEKNISKIVAPSSITSGDHYLSVVTWVTDE
						RICLQWLRRIQNFSVLTICDYSSGVWQCPKDREHLEESKTGWVGRFQPSEPYFASDKISY
						YRIISDSQGYKHIHYTDSTGKVKPITSGKWEVIDIAAVTNNSLYFISNEFDGRPGGRHLY
						KVDLKQDLKKTCITCDSNEEACQYFSVSFSTDARYYKLNCYGPGLPYFTLQNSSTDKAIK
						ILENNDNLKNVLKEIQMPSKRLRNITLHGQTYWYQMILPPNFDESKKYPLLIDVYAGPCS
						QKADAAFRINWSTYLASSEGIIVASFDGRGSGFQGDKILHAIYRRLGTYEVEDQISAAKL
						FSEMSFVDKDKMAIWGWSYGGYVTSMVLGAGSDVFKCGIAVAPVSRWQYYDSIYTERYMG
						LPEKNDNLHFYENSTVMARAKNFESVGYLLIHGTADDNVHFQQAAQISKALVDAQVDFQA
						MWYTDKDHGIDGHAHNHIYHHMSHFIKQCFKLP
1					37.8467							1		1
Coagulation factor (CF)
ID	Subtype	Protein ID	gene Length	Read	FPKM	A. acid sequence	Accesion	Coverage	Species	A.acid length	ID length	Identified Protein	Coverage	Full sequences
Unigene28557_NKM		Coagulation factor X isoform 1	4988	1069	10.0712	MISCHFSVFLCLLLLASPIARTSVFLRHEEASNILQRARRANYFLEELKAGSIERECLEE	gi|565322740|sp|V8PHG1	5-414	[Ophiophagus hannah]	425	1232	NKM_CF01
						KCSWEEAREIFQDDLRTEEFWETYTDPNQCDSNPCQNGGTCNDRYQDYFCICPPEHEGRN
						CEIGPERKLKCFFKNGNCEQFCVDSPTMLRQCSCAEGYRLASDQVSCIAEVDYPCGKIPV
						LAKRPNQQGRIIGGYDCPPGECPWQALITENGNEKCGGVLVAPSWIISAAHCFSRVHQQN
						LRIRLGEYRINHRDEGEQERRVDELIIHEKYSFKTLDNDIALLRLSAPVNFSEYVVPICL
						PPPQFAAHILNYVEFSTVSGWGRLLEGGATSALLMRVEIPKIHKKECVLHTKFNITDNMF
						CAGYLDGSKDSCEGDSGGPHVTKYKNTWYLTGIVSWGKGCASIGTYGVYTKVIKYHQWLN
						NHMDS
1					10.0712							1
Acetylcholinesterase (AChE)
ID	Subtype	Protein ID	gene Length	Read	FPKM	A. acid sequence	Accesion	Coverage	Species	A.acid length	ID length	Identified Protein	Coverage	Full sequences
CL2828.Contig1_NKM		Acetylcholinesterase	2233	787	16.5621	MPSCQPGEMPVLWPWWLQLLCILSSVAVLPGRASELKVATQTGWVRGLSLPVLDGHVSAF	gi|34978375|sp|Q92035	1-579	[Bungarus fasciatus]	579	606	NKM_ACE01	Full	27
						LGVPFAEPPVGRMRFLRPEPVKPWQHVLDATSYQHACYQMVDDSYPGFQGTEMWNPNRGI
						SEDCLYLNIWVPSPRPRDVPVLVWIYGGGFYSGAASLDVYDGRFLTYTQNIILVSLSYRV
						GAFGFLGLPGSPEAPGNMGLLDQRLALQWIQNNIQHFGGNPRAVTIFGESAGAASVGMHL
						LSTQSRTLFQRAILQSGAPNAPWATITPAESRRRAALLGKQLGCHFNNDSELVSCLRSKT
						PQELIAKEWSVLPYKSIFRFPFVPVIDGDFFPDTPEAMLGSGNFKETQLLLGVVKDEGSY
						FLIYGLPGFSKDNESLINQADFLEGVRMGVPHANDIATEAVVLQYTDWQDQDNGEKNREA
						LDDIVGDHNVICPVVQFANDYTKRNNKVYAYLFDHRASNLPWPPWMGVPHGYEIEFVFGL
						PLNDSLNYTPQEKELSRRMMRYWVNFARTGNPTDPADKNGAWPTYTASRPQYVQLNTQPL
						AIHHSLRAQICAFWNHFLPKLLNATVDPPRADLRRRSTR
1					16.5621							1		1
Inslin-like growth factors (IGFs)
ID	Subtype	Protein ID	gene Length	Read	FPKM	A. acid sequence	Accesion	Coverage	Species	A.acid length	ID length	Identified Protein	Coverage	Full sequences
Unigene14832_NKM	Insulin-like growth factor II		1493	422	13.2826	MCISRRILLLMLTFLAYTIDSVSAYSPAETLCGGELVDTLQFVCGERGFYFSRPVGRNRG	gi|565311787|sp|V8NR69	1-185	[Ophiophagus hannah]	185	185	NKM_IGF01	Full	28
						RLNRGIVEECCFRSCDLNLLETYCAKSVKSERDLSSSLVVLPAINKDIFQKPSHVKYSKY
						DIWQKKSSQRLQRGVPNVLRARRYRWQTEGLQESEESKNHRPLVVLPTQTPPPAHTTSET
						TGSQK
1					13.2826							1		1

## Sheet: Toxin_summarized
Malaysian Naja kaouthia Venom Gland Transcriptome Toxin Transcripts Annotations - Summary (Updated 1/6/2016)
3FTx
ID	Protein ID	Subtype	gene Length	Read	FPKM		Accesion	Identified Protein	Coverage	Full sequences
Unigene31433_NKM	Alpha-elapitoxin-Nk2a	L-3FTx	257	33562	6136.82		gi|128930|sp|P01391	NKM_FTX01	Full	1
CL785.Contig2_NKM	Long neurotoxin-like OH-31	L-3FTx	596	6709	528.981		gi|82193158|sp|Q53B55	NKM_FTX02	0	0
CL785.Contig3_NKM	Long neurotoxin-like OH-31	L-3FTx	250	489	91.9174		gi|82193158|sp|Q53B55	NKM_FTX03	0	0
CL785.Contig1_NKM	Long neurotoxin-like OH-31	L-3FTx	263	164	29.3033		gi|82193158|sp|Q53B55	NKM_FTX04	0	0
CL3063.Contig2_NKM	Cobrotoxin	S-3FTx	367	518955	66449.6		gi|46397632|sp|P60770	NKM_FTX05	Full	2
CL3063.Contig1_NKM	Cobrotoxin-c	S-3FTx	364	452516	58420		gi|28380029|sp|P59276	NKM_FTX06	Full	3
Unigene29220_NKM	Short neurotoxin SNTX11	S-3FTx	375	400973	50247.3		gi|123910516|sp|Q2VBP1	NKM_FTX07	Full	4
Unigene29219_NKM	Cobrotoxin-b	S-3FTx	504	102548	9561.49		gi|6226881|sp|P80958	NKM_FTX08	0	0
Unigene6569_NKM	Neurotoxin homolog NL1	S-3FTx	417	25316	2852.91		gi|46397021|sp|Q9DEQ3	NKM_FTX09	Full	5
Unigene29221_NKM	Cytotoxin 5	S-3FTx	837	1956696	109857		gi|2500802|sp|Q98961	NKM_FTX10	Full	6
CL2753.Contig1_NKM	Cardiotoxin 7	S-3FTx	218	33981	7325.02		gi|2500805|sp|Q91996	NKM_FTX11	Full	7
CL5219.Contig1_NKM	Muscarinic toxin-like protein 2	S-3FTx	201	12185	2848.78		gi|12230755|sp|P82463	NKM_FTX12	Full	8
Unigene31771_NKM	Muscarinic toxin-like protein 3 homolog	S-3FTx	244	168	32.3555		gi|172048118|sp|A8N286	NKM_FTX13	Full	9
Unigene29218_NKM	Weak tryptophan-containing neurotoxin	NC-3FTx	851	658499	36362.6		gi|311033516|sp|P82935	NKM_FTX14	Full	10
Unigene7145_NKM	three finger toxin-like	NC-3FTx	491	456	43.6428		gi|88861958|sp|Q27J50	NKM_FTX15	Full	11
15	0	0	0	0	350787		0	15	0	11
CRISP
ID	Protein ID	Subtype	gene Length	Read	FPKM		Accesion	Identified Protein	Coverage	Full sequences
Unigene29811_NKM	kaouthin-2	0	312	38600	5813.82		gi|197726031|sp|P84808	NKM_CRP01	0	0
CL3055.Contig1_NKM	kaouthin-2	0	520	29584	2673.51		gi|197726031|sp|P84808	NKM_CRP02	0	0
CL2446.Contig3_NKM	Natrin-1	0	503	38858	3630.29		gi|48428837|sp|Q7T1K6	NKM_CRP03	0	0
CL2446.Contig1_NKM	Natrin-1	0	213	9392	2072.08		gi|48428837|sp|Q7T1K6	NKM_CRP04	0	0
CL2446.Contig2_NKM	Natrin-2	0	655	29349	2105.62		gi|48428841|sp|Q7ZZN8	NKM_CRP05	0	0
5	0	0	0	0	16295.3		0	5	0	0
CVF
ID	Protein ID	Subtype	gene Length	Read	FPKM		Accesion	Identified Protein	Coverage	Full sequences
Unigene31408_NKM	Cobra venom factor	0	228	13851	2854.8		gi|54035743|sp|Q91132	NKM_CVF01	0	0
Unigene31407_NKM	Cobra venom factor	0	3400	178076	2461.25		gi|54035743|sp|Q91132	NKM_CVF02	0	0
Unigene31409_NKM	Cobra venom factor	0	1310	54315	1948.4		gi|54035743|sp|Q91132	NKM_CVF03	0	0
Unigene31410_NKM	Cobra venom factor	0	551	18402	1569.43		gi|54035743|sp|Q91132	NKM_CVF04	0	0
4	0	0	0	0	8833.87		0	4	0	0
PLA2
ID	Protein ID	Subtype	gene Length	Read	FPKM		Accesion	Identified Protein	Coverage	Full sequences
CL5128.Contig2_NKM	Acidic phospholipase A2 1	0	1725	265455	7231.54		gi|24638468|sp|P00596	NKM_PLA01	Full	12
CL5128.Contig1_NKM	Phospholipase A2 GL16-1	0	231	246	50.044		gi|25453145|sp|Q8JFB2	NKM_PLA02	0	0
2	0	0	0	0	7281.58		0	2	0	1
SVMP
ID	Protein ID	Subtype	gene Length	Read	FPKM		Accesion	Identified Protein	Coverage	Full sequences
CL2051.Contig1_NKM	Zinc metalloproteinase-disintegrin atragin	P-III	1368	69593	2390.61		gi|391359383|sp|D3TTC2	NKM_SMP01	0	0
Unigene31353_NKM	Zinc metalloproteinase-disintegrin atragin	P-III	749	27943	1753.15		gi|391359383|sp|D3TTC2	NKM_SMP02	0	0
CL1005.Contig2_NKM	Hemorrhagic metalloproteinase-disintegrin kaouthiagin	P-III	1013	20539	952.793		gi|32469675|sp|P82942	NKM_SMP03	0	0
CL1005.Contig1_NKM	Hemorrhagic metalloproteinase-disintegrin kaouthiagin	P-III	1064	20467	903.944		gi|32469675|sp|P82942	NKM_SMP04	0	0
CL5605.Contig1_NKM	Hemorrhagic metalloproteinase-disintegrin kaouthiagin	P-III	1573	9998	298.685		gi|32469675|sp|P82942	NKM_SMP05	0	0
CL2051.Contig3_NKM	carinatease-1	P-III	279	1181	198.918	233.111	gi|145982754|sp|B5KFV1	NKM_SMP06	0	0
Unigene30254_NKM	carinatease-1	P-III	525	382	34.1927		gi|145982754|sp|B5KFV1	NKM_SMP06	0	0
7	0	0	0	0	6532.29		0	6	0	0
NGF
ID	Protein ID	Subtype	gene Length	Read	FPKM		Accesion	Identified Protein	Coverage	Full sequences
CL1038.Contig1_NKM	nerve growth factor beta chain	0	886	79047	4192.57		gi|11275218|pir|A59218	NKM_NGF01	Full	13
1	0	0	0	0	4192.57		0	1	0	1
KSPI
ID	Protein ID	Subtype	gene Length	Read	FPKM		Accesion	Identified Protein	Coverage	Full sequences
CL3495.Contig1_NKM	Protease inhibitor	0	890	46665	2463.94		gi|125050|sp|P20229	NKM_KPI01	Full	14
Unigene777_NKM	Kunitz-type protease inhibitor 1	0	3984	7306	86.1766		gi|565300423|sp|V8N7R6	NKM_KPI02	Full	15
2	0	0	0	0	2550.12		0	2	0	2
NP
ID	Protein ID	Subtype	gene Length	Read	FPKM		Accesion	Identified Protein	Coverage	Full sequences
Unigene31072_NKM	Natriuretic peptide Na-NP	0	590	26082	2077.39		gi|317412168|sp|D9IX97	NKM_NP01	0	0
CL4576.Contig1_NKM	Natriuretic peptide Na-NP	0	1515	3727	115.605		gi|317412168|sp|D9IX97	NKM_NP02	0	0
2	0	0	0	0	2192.99		0	2	0	0
Neprilysin
ID	Protein ID	Subtype	gene Length	Read	FPKM		Accesion	Identified Protein	Coverage	Full sequences
Unigene27155_NKM	neprilysin-like	0	662	9004	639.155		gi|602662603|XP_007436944	NKM_NEP01	0	0
Unigene27154_NKM	neprilysin-like	0	1125	10138	423.476		gi|602662603|XP_007436944	NKM_NEP02	0	0
Unigene27153_NKM	neprilysin-like	0	4117	37013	422.476		gi|602662603|XP_007436944	NKM_NEP03	0	0
3	0	0	0	0	1485.11		0	3	0	0
Snaclec
ID	Protein ID	Subtype	gene Length	Read	FPKM		Accesion	Identified Protein	Coverage	Full sequences
Unigene514_NKM	C-type lectin BFL-1	0	855	20995	1153.93		gi|75570172|sp|Q90WI8	NKM_SCL01	Full	16
Unigene821_NKM	C-type lectin BFL-2	0	603	825	64.2933		gi|75570171|sp|Q90WI7	NKM_SCL02	Full	17
Unigene7575_NKM	venom C-type lectin mannose binding isoform 2 variant 1	0	380	82	10.1405		gi|145699639|sp|D2YVL4	NKM_SCL03	0	0
Unigene7574_NKM	C-type lectin isoform 3	0	347	74	10.0215		gi|262479390|sp|H8PG91	NKM_SCL04	0	0
4	0	0	0	0	1238.38		0	4	0	2
Cystatin
ID	Protein ID	Subtype	gene Length	Read	FPKM		Accesion	Identified Protein	Coverage	Full sequences
Unigene864_NKM	hypothetical protein L345_15265	0	1009	12521	583.145		gi|565302450|sp|V8NBS6	NKM_CYS01	Full	18
Unigene14260_NKM	cystatin	0	816	1532	88.2262		gi|239618555|sp|E3P6P4	NKM_CYS02	Full	19
Unigene13582_NKM	Cystatin-C	0	1245	1663	62.77		gi|565314548|sp|V8NX38	NKM_CYS03	0	0
Unigene20695_NKM	hypothetical protein L345_15526	0	919	362	18.5107		gi|565301856|sp|V8NB07	NKM_CYS04	0	0
4	0	0	0	0	752.652		0	4	0	2
LAAO
ID	Protein ID	Subtype	gene Length	Read	FPKM		Accesion	Identified Protein	Coverage	Full sequences
CL817.Contig1_NKM	L-amino-acid oxidase	0	2442	24953	480.182		gi|347602454|sp|A8QL58	NKM_LAO01	Full	20
1	0	0	0	0	480.182		0	1	0	1
Vespryn
ID	Protein ID	Subtype	gene Length	Read	FPKM		Accesion	Identified Protein	Coverage	Full sequences
Unigene28525_NKM	Thaicobrin	0	1631	16481	474.852		gi|32363235|sp|P82885	NKM_VES01	Full	21
1	0	0	0	0	474.852		0	1	0	1
PDE
ID	Protein ID	Subtype	gene Length	Read	FPKM		Accesion	Identified Protein	Coverage	Full sequences
CL196.Contig5_NKM	phosphodiesterase	0	3389	30885	428.257		gi|537444868|sp|U3FAB3	NKM_PDE01	Full	22
Unigene30820_NKM	phosphodiesterase	0	1281	988	36.244		gi|537444868|sp|U3FAB3	NKM_PDE02	0	0
2	0	0	0	0	464.501		0	2	0	1
Aminopeptidase
ID	Protein ID	Subtype	gene Length	Read	FPKM		Accesion	Identified Protein	Coverage	Full sequences
Unigene30142_NKM	aminopeptidase N	0	1485	2654	83.9853		gi|211926750|sp|B6EWW5	NKM_AP01	0	0
Unigene23800_NKM	aminopeptidase B	0	1812	608	15.7679		gi|565300811|sp|V8N861	NKM_AP02	0	0
2	0	0	0	0	99.7532		0	2	0	0
SVSP
ID	Protein ID	Subtype	gene Length	Read	FPKM		Accesion	Identified Protein	Coverage	Full sequences
CL861.Contig1_NKM	Serine protease harobin	0	1236	3209	122.006		gi|82232159|sp|Q5MCS0	NKM_SSP01	Full	23
1	0	0	0	0	122.006		0	1	0	1
Waprin
ID	Protein ID	Subtype	gene Length	Read	FPKM		Accesion	Identified Protein	Coverage	Full sequences
CL3529.Contig3_NKM	Scuwaprin-a	0	359	261	34.1645	34.1645	gi|239977681|sp|B5G6G8	NKM_WAP01	Full	24
1	0	0	0	0	34.1645		0	1	0	1
PLB
ID	Protein ID	Subtype	gene Length	Read	FPKM		Accesion	Identified Protein	Coverage	Full sequences
CL2411.Contig1_NKM	Putative phospholipase B 81b	0	1892	1280	31.792	31.792	gi|449061871|sp|F8J2D3	NKM_PLB01	Full	25
1	0	0	0	0	31.792		0	1	0	1
5' NUC
ID	Protein ID	Subtype	gene Length	Read	FPKM		Accesion	Identified Protein	Coverage	Full sequences
Unigene23440_NKM	5&apos; nucleotidase	0	607	209	16.1803		gi|118151736|sp|A6MFL8	NKM_NUC01	0	0
Unigene30350_NKM	Snake venom 5&apos;-nucleotidase	0	1695	371	10.2857	10.2857	gi|395455150|sp|F8S0Z7	NKM_NUC02	0	0
2	0	0	0	0	26.466		0	2	0	0
DPP-IV
ID	Protein ID	Subtype	gene Length	Read	FPKM		Accesion	Identified Protein	Coverage	Full sequences
Unigene23250_NKM	venom dipeptidylpeptidase IV	0	2641	2127	37.8467		gi|148372359|sp|A6MJH7	NKM_DPP01	Full	26
1	0	0	0	0	37.8467		0	1	0	1
Coagulation Factor
ID	Protein ID	Subtype	gene Length	Read	FPKM		Accesion	Identified Protein	Coverage	Full sequences
Unigene28557_NKM	Coagulation factor X isoform 1	0	4988	1069	10.0712		gi|565322740|sp|V8PHG1	NKM_CF01	0	0
1	0	0	0	0	10.0712		0	1	0	0
AChE
ID	Protein ID	Subtype	gene Length	Read	FPKM		Accesion	Identified Protein	Coverage	Full sequences
CL2828.Contig1_NKM	Acetylcholinesterase	0	2233	787	16.5621		gi|34978375|sp|Q92035	NKM_ACE01	Full	27
1	0	0	0	0	16.5621		0	1	0	1
IGF
ID	Protein ID	Subtype	gene Length	Read	FPKM		Accesion	Identified Protein	Coverage	Full sequences
Unigene14832_NKM	Insulin-like growth factor II	0	1493	422	13.2826		gi|565311787|sp|V8NR69	NKM_IGF01	Full	28
1	0	0	0	0	13.2826		0	1	0	1

## Sheet: Toxins_FPKM and Redundancy
Malaysian Naja kaouthia Venom Gland Transcriptome Toxin Transcripts FPKM and Redundancy
			FPKM	FPKM %	Transcript		3FTXs	FPKM	FPKM%/Family	FPKM %/Toxin
		Total	981111	1	67216		S-3FTXs	307594	0.876868	0.761459
	187531	Unidentified	166011	0.169207	40597		L-3FTXs	6787.03	0.019348	0.0168015
		Non-toxin	411147	0.419062	26513		NC-3FTXs	36406.2	0.103784	0.0901247
		Toxin	403954	0.411731	106			350787	1	0.868385
Identified Protein	ID	Protein ID	Subtype	FPKM	FPKM %/Toxin	FPKM %/Overall	FPKM%/Family	Redundancy	Accesion	Non-redundant transcript	Transcripts
	Three finger toxins (3FTxs)			350787	0.868385	0.357541	1	23385.8		15	15
NKM_FTX01	Unigene31433_NKM	Alpha-elapitoxin-Nk2a	L-3FTx	6136.82	0.0151919	0.00625497	0.0174944		gi|128930|sp|P01391
NKM_FTX02	CL785.Contig2_NKM	Long neurotoxin-like OH-31	L-3FTx	528.981	0.00130951	0.000539165	0.00150798		gi|82193158|sp|Q53B55
NKM_FTX03	CL785.Contig3_NKM	Long neurotoxin-like OH-31	L-3FTx	91.9174	0.000227544	9.3687e-05	0.000262032		gi|82193158|sp|Q53B55
NKM_FTX04	CL785.Contig1_NKM	Long neurotoxin-like OH-31	L-3FTx	29.3033	7.25412e-05	2.98675e-05	8.35358e-05		gi|82193158|sp|Q53B55
			L-3FTX	6787.03	0.0168015	0.00691769	0.019348			4	4
NKM_FTX05	CL3063.Contig2_NKM	Cobrotoxin	S-3FTx	66449.6	0.164498	0.0677289	0.18943		gi|46397632|sp|P60770
NKM_FTX06	CL3063.Contig1_NKM	Cobrotoxin-c	S-3FTx	58420	0.14462	0.0595447	0.16654		gi|28380029|sp|P59276
NKM_FTX07	Unigene29220_NKM	Short neurotoxin SNTX11	S-3FTx	50247.3	0.124389	0.0512147	0.143241		gi|123910516|sp|Q2VBP1
NKM_FTX08	Unigene29219_NKM	Cobrotoxin-b	S-3FTx	9561.49	0.0236698	0.00974557	0.0272572		gi|6226881|sp|P80958
NKM_FTX09	Unigene6569_NKM	Neurotoxin homolog NL1	S-3FTx	2852.91	0.00706246	0.00290783	0.00813287		gi|46397021|sp|Q9DEQ3
NKM_FTX10	Unigene29221_NKM	Cytotoxin 5	S-3FTx	109857	0.271954	0.111972	0.313172		gi|2500802|sp|Q98961
NKM_FTX11	CL2753.Contig1_NKM	Cardiotoxin 7	S-3FTx	7325.02	0.0181333	0.00746604	0.0208816		gi|2500805|sp|Q91996
NKM_FTX12	CL5219.Contig1_NKM	Muscarinic toxin-like protein 2	S-3FTx	2848.78	0.00705223	0.00290362	0.00812109		gi|12230755|sp|P82463
NKM_FTX13	Unigene31771_NKM	Muscarinic toxin-like protein 3 homolog	S-3FTx	32.3555	8.0097e-05	3.29784e-05	9.22368e-05		gi|172048118|sp|A8N286
			S-3FTX	307594	0.761459	0.313516	0.876868			9	9
NKM_FTX14	Unigene29218_NKM	Weak tryptophan-containing neurotoxin	NC-3FTx	36362.6	0.0900166	0.0370626	0.10366		gi|311033516|sp|P82935
NKM_FTX15	Unigene7145_NKM	three finger toxin-like	NC-3FTx	43.6428	0.000108039	4.4483e-05	0.000124414		gi|88861958|sp|Q27J50
			NC-3FTX	36406.2	0.0901247	0.0371071	0.103784			2	2
	Cysteine-rich secretory protein (CRISP)			16295.3	0.0403396	0.0166091	1	3259.07		5	5
NKM_CRP01	Unigene29811_NKM	kaouthin-2	0	5813.82	0.0143923	0.00592575	0.356778		gi|197726031|sp|P84808
NKM_CRP02	CL3055.Contig1_NKM	kaouthin-2	0	2673.51	0.00661836	0.00272499	0.164066		gi|197726031|sp|P84808
NKM_CRP03	CL2446.Contig3_NKM	Natrin-1	0	3630.29	0.00898689	0.00370018	0.222781		gi|48428837|sp|Q7T1K6
NKM_CRP04	CL2446.Contig1_NKM	Natrin-1	0	2072.08	0.00512951	0.00211198	0.127158		gi|48428837|sp|Q7T1K6
NKM_CRP05	CL2446.Contig2_NKM	Natrin-2	0	2105.62	0.00521254	0.00214616	0.129216		gi|48428841|sp|Q7ZZN8
	Cobra venom factor (CVF)			8833.87	0.0218685	0.00900394	1	2208.47		4	4
NKM_CVF01	Unigene31408_NKM	Cobra venom factor	0	2854.8	0.00706714	0.00290976	0.323165		gi|54035743|sp|Q91132
NKM_CVF02	Unigene31407_NKM	Cobra venom factor	0	2461.25	0.00609289	0.00250863	0.278615		gi|54035743|sp|Q91132
NKM_CVF03	Unigene31409_NKM	Cobra venom factor	0	1948.4	0.00482332	0.00198591	0.22056		gi|54035743|sp|Q91132
NKM_CVF04	Unigene31410_NKM	Cobra venom factor	0	1569.43	0.00388517	0.00159965	0.177661		gi|54035743|sp|Q91132
	Phospholipase A2 (PLA2)			7281.58	0.0180258	0.00742177	1	3640.79		2	2
NKM_PLA01	CL5128.Contig2_NKM	Acidic phospholipase A2 1	0	7231.54	0.0179019	0.00737076	0.993127		gi|24638468|sp|P00596
NKM_PLA02	CL5128.Contig1_NKM	Phospholipase A2 GL16-1	0	50.044	0.000123885	5.10075e-05	0.00687268		gi|25453145|sp|Q8JFB2
	Snake venom metalloproteinase (SVMP)			6532.29	0.0161709	0.00665806	1	1088.72		6	7
NKM_SMP01	CL2051.Contig1_NKM	Zinc metalloproteinase-disintegrin atragin	P-III	2390.61	0.00591802	0.00243663	0.365968		gi|391359383|sp|D3TTC2
NKM_SMP02	Unigene31353_NKM	Zinc metalloproteinase-disintegrin atragin	P-III	1753.15	0.00433999	0.00178691	0.268383		gi|391359383|sp|D3TTC2
NKM_SMP03	CL1005.Contig2_NKM	Hemorrhagic metalloproteinase-disintegrin kaouthiagin	P-III	952.793	0.00235867	0.000971137	0.145859		gi|32469675|sp|P82942
NKM_SMP04	CL1005.Contig1_NKM	Hemorrhagic metalloproteinase-disintegrin kaouthiagin	P-III	903.944	0.00223774	0.000921347	0.138381		gi|32469675|sp|P82942
NKM_SMP05	CL5605.Contig1_NKM	Hemorrhagic metalloproteinase-disintegrin kaouthiagin	P-III	298.685	0.000739404	0.000304435	0.0457243		gi|32469675|sp|P82942
NKM_SMP06	CL2051.Contig3_NKM	carinatease-1	P-III	233.111	0.000577073	0.000237599	0.0356859		gi|145982754|sp|B5KFV1
	Nerve growth factor (NGF)			4192.57	0.0103788	0.00427329	1	4192.57		1	1
NKM_NGF01	CL1038.Contig1_NKM	nerve growth factor beta chain	0	4192.57	0.0103788	0.00427329	1		gi|11275218|pir|A59218
	Kunitz-type serine protease inhibitor (KSPI)			2550.12	0.00631289	0.00259921	1	1275.06		2	2
NKM_KPI01	CL3495.Contig1_NKM	Protease inhibitor	0	2463.94	0.00609956	0.00251138	0.966207		gi|125050|sp|P20229
NKM_KPI02	Unigene777_NKM	Kunitz-type protease inhibitor 1	0	86.1766	0.000213333	8.78357e-05	0.0337932		gi|565300423|sp|V8N7R6
	Natriuretic peptide (NP)			2192.99	0.00542882	0.00223521	1	1096.5		2	2
NKM_NP01	Unigene31072_NKM	Natriuretic peptide Na-NP	0	2077.39	0.00514264	0.00211738	0.947285		gi|317412168|sp|D9IX97
NKM_NP02	CL4576.Contig1_NKM	Natriuretic peptide Na-NP	0	115.605	0.000286183	0.00011783	0.0527155		gi|317412168|sp|D9IX97
	Neprilysin			1485.11	0.00367643	0.0015137	1	495.036		3	3
NKM_NEP01	Unigene27155_NKM	neprilysin-like	0	639.155	0.00158225	0.00065146	0.430376		gi|602662603|XP_007436944
NKM_NEP02	Unigene27154_NKM	neprilysin-like	0	423.476	0.00104833	0.000431629	0.285148		gi|602662603|XP_007436944
NKM_NEP03	Unigene27153_NKM	neprilysin-like	0	422.476	0.00104585	0.00043061	0.284475		gi|602662603|XP_007436944
	Snake venom C-type lectin/lectin-like protein (snaclec)			1238.38	0.00306566	0.00126222	1	309.596		4	4
NKM_SCL01	Unigene514_NKM	C-type lectin BFL-1	0	1153.93	0.00285658	0.00117614	0.931802		gi|75570172|sp|Q90WI8
NKM_SCL02	Unigene821_NKM	C-type lectin BFL-2	0	64.2933	0.00015916	6.55311e-05	0.0519171		gi|75570171|sp|Q90WI7
NKM_SCL03	Unigene7575_NKM	venom C-type lectin mannose binding isoform 2 variant 1	0	10.1405	2.51031e-05	1.03357e-05	0.0081885		gi|145699639|sp|D2YVL4
NKM_SCL04	Unigene7574_NKM	C-type lectin isoform 3	0	10.0215	2.48085e-05	1.02144e-05	0.00809241		gi|262479390|sp|H8PG91
	Cystatin			752.652	0.00186321	0.000767142	1	188.163		4	4
NKM_CYS01	Unigene864_NKM	hypothetical protein L345_15265	0	583.145	0.00144359	0.000594372	0.774787		gi|565302450|sp|V8NBS6
NKM_CYS02	Unigene14260_NKM	cystatin	0	88.2262	0.000218407	8.99248e-05	0.11722		gi|239618555|sp|E3P6P4
NKM_CYS03	Unigene13582_NKM	Cystatin-C	0	62.77	0.000155389	6.39785e-05	0.0833984		gi|565314548|sp|V8NX38
NKM_CYS04	Unigene20695_NKM	hypothetical protein L345_15526	0	18.5107	4.58238e-05	1.88671e-05	0.024594		gi|565301856|sp|V8NB07
	L-amino-acid oxidase (LAAO)			480.182	0.00118871	0.000489427	1	480.182		1	1
NKM_LAO01	CL817.Contig1_NKM	L-amino-acid oxidase	0	480.182	0.00118871	0.000489427	1		gi|347602454|sp|A8QL58
	Vespryn			474.852	0.00117551	0.000483994	1	474.852		1	1
NKM_VES01	Unigene28525_NKM	Thaicobrin	0	474.852	0.00117551	0.000483994	1		gi|32363235|sp|P82885
	Phosphodiesterase (PDE)			464.501	0.00114989	0.000473444	1	232.251		2	2
NKM_PDE01	CL196.Contig5_NKM	phosphodiesterase	0	428.257	0.00106016	0.000436502	0.921972		gi|537444868|sp|U3FAB3
NKM_PDE02	Unigene30820_NKM	phosphodiesterase	0	36.244	8.97231e-05	3.69418e-05	0.0780278		gi|537444868|sp|U3FAB3
	Aminopeptidase			99.7532	0.000246942	0.000101674	1	49.8766		2	2
NKM_AP01	Unigene30142_NKM	aminopeptidase N	0	83.9853	0.000207908	8.56022e-05	0.841931		gi|211926750|sp|B6EWW5
NKM_AP02	Unigene23800_NKM	aminopeptidase B	0	15.7679	3.90339e-05	1.60715e-05	0.158069		gi|565300811|sp|V8N861
	Snake venom serine protease (SVSP)			122.006	0.000302029	0.000124355	1	122.006		1	1
NKM_SSP01	CL861.Contig1_NKM	Serine protease harobin	0	122.006	0.000302029	0.000124355	1		gi|82232159|sp|Q5MCS0
	Waprin			34.1645	8.45753e-05	3.48222e-05	1	34.1645		1	1
NKM_WAP01	CL3529.Contig3_NKM	Scuwaprin-a	0	34.1645	8.45753e-05	3.48222e-05	1		gi|239977681|sp|B5G6G8
	Phospholipase Bs (PLBs)			31.792	7.87021e-05	3.24041e-05	1	31.792		1	1
NKM_PLB01	CL2411.Contig1_NKM	Putative phospholipase B 81b	0	31.792	7.87021e-05	3.24041e-05	1		gi|449061871|sp|F8J2D3
	5' nucleotidase (5'NUC)			26.466	6.55174e-05	2.69755e-05	1	13.233		2	2
NKM_NUC01	Unigene23440_NKM	5&apos; nucleotidase	0	16.1803	4.00548e-05	1.64918e-05	0.611362		gi|118151736|sp|A6MFL8
NKM_NUC02	Unigene30350_NKM	Snake venom 5&apos;-nucleotidase	0	10.2857	2.54626e-05	1.04837e-05	0.388638		gi|395455150|sp|F8S0Z7
	Dipeptidylpeptidase IV (DPP IV)			37.8467	9.36907e-05	3.85753e-05	1	37.8467		1	1
NKM_DPP01	Unigene23250_NKM	venom dipeptidylpeptidase IV	0	37.8467	9.36907e-05	3.85753e-05	1		gi|148372359|sp|A6MJH7
	Coagulation factor (CF)			10.0712	2.49316e-05	1.02651e-05	1	10.0712		1	1
NKM_CF01	Unigene28557_NKM	Coagulation factor X isoform 1	0	10.0712	2.49316e-05	1.02651e-05	1		gi|565322740|sp|V8PHG1
	Acetylcholinesterase (AChE)			16.5621	4.1e-05	1.6881e-05	1	16.5621		1	1
NKM_ACE01	CL2828.Contig1_NKM	Acetylcholinesterase	0	16.5621	4.1e-05	1.6881e-05	1		gi|34978375|sp|Q92035
	Insulin-like Growth Factor (IGF)			13.2826	3.28815e-05	1.35383e-05	1	13.2826		1	1
NKM_IGF01	Unigene14832_NKM	Insulin-like growth factor II	0	13.2826	3.28815e-05	1.35383e-05	1		gi|565311787|sp|V8NR69

## Sheet: Toxins_Pie Chart
Malaysian Naja kaouthia Venom Gland Transcriptome (Pie Chart)
		FPKM	FPKM %	FPKM %/Overall
	Total	981111	1	1
	Unidentified	166011	0.169207	0.169207
	Non-Toxin	411147	0.419062	0.419062
ID	Toxin	403954	0.411731		Transcript	Non-redundant transcript	Full sequence
Three finger toxins	3FTxs	350787	0.868385	0.357541	15	15	11
	L-3FTx	6787.03	0.0168015	0.00691769	4	4	1
	LNTX	6787.03	0.0167902	0.00563255	4	4	1
	S-3FTx	307594	0.761459	0.313516	9	9	8
	SNTX (cobrotoxin, short NTX, NTX homolog )	187531	0.463927	0.155632	5	5	4
	CTX (cytotoxin, cardiotoxin)	117182	0.289892	0.0972492	2	2	2
	MTLP (muscarinic toxin-like protein)	2881.13	0.00712754	0.00239105	2	2	2
	NC-3FTx	36406.2	0.0901247	0.0371071	2	2	2
	WTX (Weak neurotoxin, 3FTxs-like)	36406.2	0.0900641	0.0302135	2	2	2
Cysteine-rich secretory protein (CRISP)	CRISP	16295.3	0.0403396	0.0166091	5	5	0
Cobra venom factor (CVF)	CVF	8833.87	0.0218685	0.00900394	4	4	0
Phospholipase A2 (PLA2)	PLA2	7281.58	0.0180258	0.00742177	2	2	1
Snake venom metalloproteinase (SVMP)	SVMP	6532.29	0.0161709	0.00665806	7	6	0
Nerve growth factor (NGF)	NGF	4192.57	0.0103788	0.00427329	1	1	1
Kunitz-type serine protease inhibitor (KSPI)	KSPI	2550.12	0.00631289	0.00259921	2	2	2
Natriuretic peptide (CNP)	NP	2192.99	0.00542882	0.00223521	2	2	0
Neprilysin	Neprilysin	1485.11	0.00367643	0.0015137	3	3	0
Snake venom C-type lectin/lectin-like protein (snaclec)	Snaclec	1238.38	0.00306566	0.00126222	4	4	2
Cystatin	Cystatin	752.652	0.00186321	0.000767142	4	4	2
L-amino-acid oxidase (LAAO)	LAAO	480.182	0.00118871	0.000489427	1	1	1
Vespryn	Vespryn	474.852	0.00117551	0.000483994	1	1	1
Phosphodiesterase (PDE)	PDE	464.501	0.00114989	0.000473444	2	2	1
Aminopeptidase	Aminopeptidase	99.7532	0.000246942	0.000101674	2	2	0
Snake venom serine protease (SVSP)	SVSP	122.006	0.000302029	0.000124355	1	1	1
Waprin	Waprin	34.1645	8.45753e-05	3.48222e-05	1	1	1
Phospholipase Bs (PLBs)	PLB	31.792	7.87021e-05	3.24041e-05	1	1	1
5' nucleotidase (5'NUC)	5'NUC	26.466	6.55174e-05	2.69755e-05	2	2	0
Dipeptidylpeptidase IV (DPP IV)	DPP IV	37.8467	9.36907e-05	3.85753e-05	1	1	1
Coagulation factor (CF)	CF	10.0712	2.49316e-05	1.02651e-05	1	1	0
Acetylcholinesterase (AChE)	AChE	16.5621	4.1e-05	1.6881e-05	1	1	1
Insulin-like Growth Factor (IGF)	IGF	13.2826	3.28815e-05	1.35383e-05	1	1	1
		403954	1	1	64	63	28
0	Three finger toxins (3FTxs)	0	0				1	23385.8	0	15	15
0	0	0	L-3FTX				0.019348	0	0	4	4
0	0	0	S-3FTX				0.876868	0	0	9	9
0	0	0	NC-3FTX				0.103784	0	0	2	2
0	Cysteine-rich secretory protein (CRISP)	0	0				1	3259.07	0	5	5
0	Cobra venom factor (CVF)	0	0				1	2208.47	0	4	4
0	Phospholipase A2 (PLA2)	0	0				1	3640.79	0	2	2
0	Snake venom metalloproteinase (SVMP)	0	0				1	1088.72	0	6	7
0	Nerve growth factor (NGF)	0	0				1	4192.57	0	1	1
0	Kunitz-type serine protease inhibitor (KSPI)	0	0				1	1275.06	0	2	2
0	Natriuretic peptide (NP)	0	0				1	1096.5	0	2	2
0	Neprilysin	0	0				1	495.036	0	3	3
0	Snake venom C-type lectin/lectin-like protein (snaclec)	0	0				1	309.596	0	4	4
0	Cystatin	0	0				1	188.163	0	4	4
0	L-amino-acid oxidase (LAAO)	0	0				1	480.182	0	1	1
0	Vespryn	0	0				1	474.852	0	1	1
0	Phosphodiesterase (PDE)	0	0				1	232.251	0	2	2
0	Aminopeptidase	0	0				1	49.8766	0	2	2
0	Snake venom serine protease (SVSP)	0	0				1	122.006	0	1	1
0	Waprin	0	0				1	34.1645	0	1	1
0	Phospholipase Bs (PLBs)	0	0				1	31.792	0	1	1
0	5' nucleotidase (5'NUC)	0	0				1	13.233	0	2	2
0	Dipeptidylpeptidase IV (DPP IV)	0	0				1	37.8467	0	1	1
0	Coagulation factor (CF)	0	0				1	10.0712	0	1	1
0	Acetylcholinesterase (AChE)	0	0				1	16.5621	0	1	1
0	Insulin-like Growth Factor (IGF)	0	0				1	13.2826	0	1	1
