# Supplementary material for: Comparative venom gland transcriptomics of Naja kaouthia (monocled cobra) from Malaysia and Thailand: elucidating geographical venom variation and insights into sequence novelty
Source: PeerJ. 2017 Apr 5;5:e3142. doi: 10.7717/peerj.3142 (PMC5384570; doi:10.7717/peerj.3142)
Supplement: Supplemental Information 4 [file peerj-05-3142-s004.xlsx]

## Sheet: Coexpressed NK-M and NK-T
Supplemental Data S3: Comparison of toxin transcript sequences from the venom gland transcriptomes of Malaysian (NK-M) and Thai Naja kaouthia (NK-T) with the Nr-annotated toxins deposited in public database. First column indicates accession number of NCBI and SwissProt database used in the comparison. Second column shows set of sequence comparisons that have been carried out. Third column indicat…
Accesion ID	Seq. No.	Protein Family		Amino acid sequence comparison	Coverage	Remark
		Three finger toxin (3FTx)
P01391		Alpha-elapitoxin-Nk2a		IRCFITPDITSKDCPNGHVCYTKTWCDAFCSIRGKRVDLGCAATCPTVKTGVDIQCCSTDNCNPFPTRKRP		Naja kaouthia
	1	NKM_FTX01		IRCFITPDITSKDCPNGHVCYTKTWCDAFCSIRGKRVDLGCAATCPTVKTGVDIQCCSTDNCNPFPTRKRP	1-71	IDENTICAL
		NKT_FTX02		MKTLLLTLVLVTIVCLDLGYTIRCFITPDITSKDCPNGHVCYTKTWCDAFC	1-30
		NKT_FTX01		KTWCDAFCSIRGKRVDLGCAATCPTVKTGVDIQCCSTDNCNPFPTRKRP	23-71
P60770		Cobrotoxin		MKTLLLTLLVVTIVCLDLGYTLECHNQQSSQTPTTTGCSGGETNCYKKRWRDHRGYRTERGCGCPSVKNGIEINCCTTDRCNN		Naja atra
	2	NKM_FTX05		LECHNQQSSQTPTTTGCSGGETNCYKKRWRDHRGYRTERGCGCPSVRNGIEINCCTTDRCNN	22-83	IDENTICAL
		NKT_FTX06		NCYKKRWRDHRGYRTERGCGCPSVRNGIEINCCTTDRCNN	44-83
P59276		Cobrotoxin-c		LECHNQQSSQAPTTKTCSGETNCYKKWWSDHRGTIIERGCGCPKVKPGVNLNCCRTDRCNN		Naja kaouthia
	3	NKM_FTX06		LECHNQQSSQAPTTKTCSGETNCYKKWWSDHRGTIIERGCGCPKVKPGVNLNCCRTDRCNN	1-61	IDENTICAL
		NKT_FTX05		MKTLLLTLLVVTIVCLDLGYTLECHNQQSSQAPTTKTCSGETNCYKKWWS	1-15
		NKT_FTX04		NCYKKWWSDHRGTIIERGCGCPKVKPGVNLNCCRTDRCNN	22-61
Q2VBP1		Short neurotoxin SNTX11		MKTLLLTFLVVTIVCLDLGYTLICHRVHGLQTCEPDQKFCFRKTTMFFPNHPVLLMGCTYSCPTEKYSVCCSTDKCNK		Ophiophagus hannah
	4	NKM_FTX07		IVCLDLGYAMECYRMSNIVTCQPWEKFCYKEVTMFFPNHPVHLSGCASECTETNSKFCCTTDKCN	13-77	IDENTICAL
		NKT_FTX07		IVCLDLGYAMECYRMSNIVTCQPWEKFCYKEVTMFFPNHPVHLSGCASECTETNSKFCCTTDKCN	13-77
Q9DEQ3		Neurotoxin homolog NL1		MKTLLLTLVVVTMVCMDLGYTTICYNHLSRTPETTEICPDSWYFCYKISLADGNDVRIKRGCTFTCPELRPTGKYVYCCRRDKCNQ		Naja atra
	5	NKM_FTX09		LTLVVVTMVCMDLGYTTICYNHLTRTSETTEICPDSWYFCYKISLADGNDVRIKRGCTFTCPELRPTGIYVYCCRRDKCNQ	6-86	IDENTICAL
		NKT_FTX08		LTLVVVTMVCMDLGYTTICYNHLTRTSETTEICPDSWYFCYKISLADGNDVRIKRGCTFTCPELRPTGIYVYCCRRDKCNQ	6-86
Q98961		Cytotoxin 5		MKTLLLTLVVVTIVCLDLGYTLKCNKLVPLFYKTCPAGKNLCYKMFMVSNKMVPVKRGCIDVCPKNSALVKYVCCNTDRCN		Naja atra
	6	NKM_FTX10		MKTLLLTLVVVTIVCLDLGSTLKCNKLIPLAYKTCPAGKNLCYKMFMVSNKTVPVKRGCIDVCPKNSLLVKYVCCNTDRCN	1-81	2-10% DIFFER
		NKT_FTX11		MKTLLLTLVVVTIVCLDLGYTLKCNKLVPLFYKTCPAGKNLCYKMFMVSNKTVPVKR	1-57
Q91996		Cardiotoxin 7		MKTLLLTLVVVTIVCLDLGYTLKCHNTQLPFIYKTCPEGKNLCFKATLKKFPLKFPVKRGCADNCPKNSALLKYVCCSTDKCN		Naja atra
	7	NKM_FTX11		DLGYTLKCHNTQLPFIYKTCPEGKNLCFKATLKKFPLKIPIKRGCADNCPKNSALLKYVCCSTDKCN	17-83	IDENTICAL
		NKT_FTX12		DLGYTLKCHNTQLPFIYKTCPEGKNLCFKATLKKFPLKIPIKRGCADNCPKNSALLKYVCCSTDKCN	17-83
P82463		Muscarinic toxin-like protein 2		LTCVKEKSIFGVTTEDCPDGQNLCFKRWHMIVPGRYKKTRGCAATCPIAENRDVIECCSTDKCNL		Naja kaouthia
	8	NKM_FTX12		LTCVKEKSIFGVTTEDCPDGQNLCFKRWHMIVPGRYKKTRGCAATCPIAENRDVIECCSTDK	1-62	IDENTICAL
		NKT_FTX13		LTCVKEKSIFGVTTEDCPDGQNLCFKRWHMIVPGRYKKTRGCAATCPIAENRDVIECCSTDK	1-62
P82935		Weak tryptophan-containing neurotoxin		MKTLLLTLVVVTIVCLDLGYTLTCLNCPEMFCGKFQICRNGEKICFKKLHQRRPLSWRYIRGCADTCPVGKPYEMIECCSTDKCNR		Naja kaouthia
	9	NKM_FTX14		MKTLLLTLVVVTIVCLDLGYTLTCLNCPEMFCGKFQICRNGEKICFKKLHQRRPLSWRYIRGCADTCPVGKPYEMIECCSTDKCNR	1-86	IDENTICAL
		NKT_FTX14		CFKKLHQRRPLSWRYIRGCADTCPVGKPYEMIECCSTDKCNR	45-86
Q27J50		three finger toxin-like		MRKIILCVLAVMLWSQAVDALECYNCRSGGRCFSTATCSDRQDRCMTIFFEAVGYQPPRYAKRCGSQYECQVLNSVSRSGITAVCCDYDRCNR		Lachesis muta
	10	NKM_FTX15		MRKINLCVLAVLLWSQVVDALVCYHCPNGGRCFTTTTCSSNQDQCMTIWFKGVGFQPPRYAKRCGSQYECQLLNSVPQSGVSAICCGFDRCNR	1-93	<2% DIFFER
		NKT_FTX16		MRKIILCVLAVLLWSQVVDALVCYHCPNGGRCFTTTTCSSNQDQCMTIWFKGVGFQPPRYAKRCGSQYECQLLNSVPQSGVSAICCGFDRCNR	1-93
		Cysteine-rich secretory protein (CRISP)
P84808		Kaouthin-2	1	MIAFIVLLSLAAVLQQSSGTVDFASESSNKRENQKQIVDKHNALRRSVRPTARNMLQMEWNSNAAQNAKRWADRCSFAHSPPHLRTVGKIGCGENLFMSSQPYAWSRVIQSWYDENKKFV		Naja kaouthia
			2	YGVGANPPGSVIGHYTQIVWYNSHLLGCGAAKCSSSKYLYVCQYCPAGNIIGSIATPYKSGPPCGDCPSACVNGLCTNPCKHHNVFSNCQSLAKQNACQTEWMKSKCAASCFCRTEII
	11	NKM_CRP02	2	GHYTQIVWYNSHLLGCGAAKCSSSKYLYVCQYCPAGNIIGSIATPYKSGPPCGDCPSACDNGLCTNPCKHHNVFSNCQSLAKQNACQTEWMKSKCAASCFCRTEII	133-238		2-10% DIFFER
	12	NKM_CRP01	2	GHYTQIVWYNSHLLGCGAAKCSSSKYLYVCQYCPAGNIIGSIATPYKSGPPCGDCPSACDNGLCTNPCTIYNKLTNCDSLLKQSSCQDDWIKSNCPASCFCR	133-234	IDENTICAL
		NKT_CRP02	1-2	MIAFIVLLSLAAVLQQSSGTVDFASESSNKRENQKQIVDKHNALRRSVRPTARNMLQMEWNSNAAQNAKRWADRCSFAHSPPHLRTVGKIGCGENLFMSSQPYAWSRVIQSWYDENKKFV	1-232
				YGVGANPPGSVIGHYTQIVWYNSHLLGCGAAKCSSSKYLYVCQYCPAGNIIGSIATPYKSGPPCGDCPSACDNGLCTNPCTIYNKLTNCDSLLKQSSCQDDWIKSNCPASCF
Q7T1K6		Natrin-1	1	MIAFSLLCFAAVLQQSFGNVDFNSESTRRKKKQKEIVDLHNSLRRRVSPTASNMLKMEWYPEAASNAERWANTCSLNHSPDNLRVLEGIQCGESIYMSSNARTWTEIIHLWHDEYKNFVY		Naja atra
			2	GVGANPPGSVTGHYTQIVWYQTYRAGCAVSYCPSSAWSYFYVCQYCPSGNFQGKTATPYKLGPPCGDCPSACDNGLCTNPCTIYNKLTNCDSLLKQSSCQDDWIKSNCPASCFCRNKII
	13	NKM_CRP04	1	MIAFSLLCFAAVLQQSFGNVDFNSESTRRK	1-30	IDENTICAL
		NKM_CRP03	1-2	SESTRRKKKQKEIVDLHNSLRRRVSPTASNMLKMEWYPEAASNAERWANTCSLNHSPDNLRVLEGIQCGESIYMSSNARTWTEIIHLWHDEYKNFVY	24-190
				GVGANPPGSVTGHYTQIVWYQTYRAGCAVSYCPSSAWSYFYVCQYCPSGNFQGKTATPYKLGPPCGDCPS
		NKT_CRP03	1	MIAFSLLCFAAVLQQSFGNVDFNSESTRRK	1-30
		NKT_CRP01	1-2	SESTRRKKKQKEIVDLHNSLRRRVSPTASNMLKMEWYPEAASNAERWANTCSLNHSPDNLRVLEGIQCGESIYMSSNARTWTEIIHLWHDEYKNFVY
				GVGANPPGSVTGHYTQIVWYQTYRAGCAVSYCPSSAWSYFYVCQYCPSGNFQGKTATPYKLGPPCGDCPS	24-190
		Cobra venom factor (CVF)
Q91132		Cobra venom factor	1	MERMALYLVAALLIGFPGSSHGALYTLITPAVLRTDTEEQILVEAHGDSTPKQLDIFVHDFPRKQKTLFQTRVDMNPAGGMLVTPTIEIPAKEVSTDSRQNQYVVVQVTGPQVRLEKVVL		Naja kaouthia
			2	LSYQSSFLFIQTDKGIYTPGSPVLYRVFSMDHNTSKMNKTVIVEFQTPEGILVSSNSVDLNFFWPYNLPDLVSLGTWRIVAKYEHSPENYTAYFDVRKYVLPSFEVRLQPSEKFFYIDGN
			3	ENFHVSITARYLYGEEVEGVAFVLFGVKIDDAKKSIPDSLTRIPIIDGDGKATLKRDTFRSRFPNLNELVGHTLYASVTVMTESGSDMVVTEQSGIHIVASPYQIHFTKTPKYFKPGMPY
			4	ELTVYVTNPDGSPAAHVPVVSEAFHSMGTTLSDGTAKLILNIPLNAQSLPITVRTNHGDLPRERQATKSMTAIAYQTQGGSGNYLHVAITSTEIKPGDNLPVNFNVKGNANSLKQIKYFT
			5	YLILNKGKIFKVGRQPRRDGQNLVTMNLHITPDLIPSFRFVAYYQVGNNEIVADSVWVDVKDTCMGTLVVKGDNLIQMPGAAMKIKLEGDPGARVGLVAVDKAVYVLNDKYKISQAKIWD
			6	TIEKSDFGCTAGSGQNNLGVFEDAGLALTTSTNLNTKQRSAAKCPQPANRRRRSSVLLLDSNASKAAEFQDQDLRKCCEDVMHENPMGYTCEKRAKYIQEGDACKAAFLECCRYIKGVRD
			7	ENQRESELFLARDDNEDGFIADSDIISRSDFPKSWLWLTKDLTEEPNSQGISSKTMSFYLRDSITTWVVLAVSFTPTKGICVAEPYEIRVMKVFFIDLQMPYSVVKNEQVEIRAILHNYV
			8	NEDIYVRVELLYNPAFCSASTKGQRYRQQFPIKALSSRAVPFVIVPLEQGLHDVEIKASVQEALWSDGVRKKLKVVPEGVQKSIVTIVKLDPRAKGVGGTQLEVIKARKLDDRVPDTEIE
			9	TKIIIQGDPVAQIIENSIDGSKLNHLIITPSGCGEQNMIRMAAPVIATYYLDTTEQWETLGINRRTEAVNQIVTGYAQQMVYKKADHSYAAFTNRASSSWLTAYVVKVFAMAAKMVAGIS
			10	HEIICGGVRWLILNRQQPDGAFKENAPVLSGTMQGGIQGAEEEVYLTAFILVALLESKTICNDYVNSLDSSIKKATNYLLKKYEKLQRPYTTALTAYALAAADQLNDDRVLMAASTGRDH
			11	WEEYNAHTHNIEGTSYALLALLKMKKFDQTGPIVRWLTDQNFYGETYGQTQATVMAFQALAEYEIQMPTHKDLNLDITIELPDREVPIRYRINYENALLARTVETKLNQDITVTASGDGK
			12	ATMTILTFYNAQLQEKANVCNKFHLNVSVENIHLNAMGAKGALMLKICTRYLGEVDSTMTIIDISMLTGFLPDAEDLTRLSKGVDRYISRYEVDNNMAQKVAVIIYLNKVSHSEDECLHF
			13	KILKHFEVGFIQPGSVKVYSYYNLDEKCTKFYHPDKGTGLLNKICIGNVCRCAGETCSSLNHQERIDVPLQIEKACETNVDYVYKTKLLRIEEQDGNDIYVMDVLEVIKQGTDENPRAKT
			14	HQYISQRKCQEALNLKVNDDYLIWGSRSDLLPTKDKISYIITKNTWIERWPHEDECQEEEFQKLCDDFAQFSYTLTEFGCPT
	14	NKM_CVF03	1-4	MERMALYLVAALLIGFPGSSHGALYTLITPAVLRTDTEEQILVEAHGDNTPKQLDIFVHDFPRKQKTLFQTRVDMNPAGGMLVTPTIEIPANEMSTDSRQNQYVVVQVTGPQVRLEKVVL	1-421	2-10% DIFFER
				LSYQSSFLFIQTDKGIYTPGSPVLYRVFSMDHNTSKMNKTVIVEFQTPEGILVSSNSVDLNFFWPYNLPDLVSLGTWRIVAKYEHSPENYTAYFDVRKYVLPSFEVRLQPSEKFFYIDGN
				ENFHVSITARYLYGKKVEGVAFVLFGVKIDDAKKSIPDSLTRIPIIDGDGKATLKRDTFRSRFPNLSELVGHTLYASVTVMTESGSDMVVSEQSGIHIVTSPYQIHFTKTPKYFKPGMPY
				ELTVYVTNPDGLPAAKVPVVSEAFHSEGTTLSDGTTKLILNIPSNAQSQPITVRTNHGDLP
		NKM_CVF02	4-13	RTNHGDLPRERQAIKSMTATAYQTQGGSGNYLHVAITSTEIKPGDNLPVNFNVRGNANSLNQIKYFT	414-1546
				YLILTKGKIFKVGRQPRRDGQNLVTMNLHITPDLIPSFRFVAYYQVGNNEIVADSVWVDVKDTCMGTLVVKGDNLIQMPGAAMKIKLEGDPGARVGLVAVDKAVYVLNDKYKISQAKIWD
				TIEKSDFGCTAGSGQNNLGVFEDAGLALTTSTNLNTKQRSAAKCPQPANRRRRSSVLLLDSKASKAAEFQDQDLSKCCEDVMHENPMGYTCEKRAKYIQEGDACKAAFLECCRYIKGVRD
				ENQRESELFLARDDNEDGFIADSDIISRSDFPESWLWLTKDLTEEPNSQGISSKTMSFYLRDSITTWVVLAVSFTPTKGICVAEPYEIRVMKVFFIDLQMPYSVVKNEQVEIRAILHNYV
				NEDIYVRVELLYNPAFCSASTKGQRYQQQFPIKALSSRAVPFVIVPLEQGLHDVEIKASVQEALWSDGVRKKLKVVPEGVQKSIVTIIKLDPRAKGVGGTQLEVIKARKLDDRVPDTEIK
				TKIIIQGDPVAQIIENSIDGSKLNHLIITPSGCGEQNMIRMAAPVIATYYLDTAEQWETLGINRRTEAVNQIMTGYAQQMVYKKADHSYAAFTNRASSSWLTAYVVKVFAMAAKMVAGIS
				HEIICGGVRWLILNRQQPDGAFKENAPVLSGTMQGGIQGEEEEVYLTAFILVALLESKTICNDYVNSLDSSIKKATNYLLKKYEKLQRPYTTALTAYALAAADQLNDDRVLMAASTGRDH
				WEEYNAHTHNIEGTSYALLALLKMKKFDQTGPIVRWLTDQNFYGGTYGQTQATVMAFQALAEYEIQMPTHQDLNLDITIELPDREVPIRYRINYENALLARTVETKLNQDFTVTASGDGK
				ATMTILTFYNAQLQEKANVCNKFHLNVSVENIHLNAMGAKGALMLKICTRYLGEVDSTMTIIDISMLTGFLPDAEDLTRLSKGVDRYISRYEVDNNMAQKVAVIIYLNKVSHSEDECLQF
				KILKHFEVGFIQPGSVKVYSYYNLDEKCTKFYHPDKGTGLLNKICVGNVCRCAGETCSSLNHQERIDVPLQIEKACETNVDYVYKTKLLRIEEQDGNDIYVMDVLE
		NKM_CVF01	13-14	IYVMDVLEVIKQGTDKNPRAKT	1539-1613
				HQYISQRKCQGALNLKVNDDYLIWGSRSDLLPTKDKISYIITKNTWIERWPHE
		NKM_CVF04	14	ECQEEEFQKLCDDFAQFSYTLTEFGCPT	1615-1642
		NKT_CVF02	1-11	MERMALYLVAALLIGFPGSSHGALYTLITPAVLRTDTEEQILVEAHGDSTPKQLDIFVHDFPRKQKTLFQTRVDMNPAGGMLVTPTIEIPAKEVSTDSRQNQYVVVQVTGPQVRLEKVVL	1-1287
				LSYQSSFLFIQTDKGIYTPGSPVLYRVFSMDHNTSKMNKTVIVEFQTPEGILVSSNSVDLNFFWPYNLPDLVSLGTWRIVAKYEHSPENYTAYFDVRKYVLPSFEVRLQPSEKFFYIDGN
				ENFHVSITARYLYGEEVEGVAFVLFGVKIDDAKKSIPDSLTRIPIIDGDGKATLKRDTFRSRFPNLNELVGHTLYASVTVMTESGSDMVVTEQSGIHIVASPYQIHFTKTPKYFKPGMPY
				ELTVYVTNPDGSPAAHVPVVSEAFHSMGTTLSDGTAKLILNIPLNAQSLPITVRTNHGDLPRERQATKSMTAIAYQTQGGSGNYLHVAITSTEIKPGDNLPVNFNVKGNANSLKQIKYFT
				YLILNKGKIFKVGRQPRRDGQNLVTMNLHITPDLIPSFRFVAYYQVGNNEIVADSVWVDVKDTCMGTLVVKGDNLIQMPGAAMKIKLEGDPGARVGLVAVDKAVYVLNDKYKISQAKIWD
				TIEKSDFGCTAGSGQNNLGVFEDAGLALTTSTNLNTKQRSAAKCPQPANRRRRSSVLLLDSNASKAAEFQDQDLRKCCEDVMHENPMGYTCEKRAKYIQEGDACKAAFLECCRYIKGVRD
				ENQRESELFLARDDNEDGFIADSDIISRSDFPKSWLWLTKDLTEEPNSQGISSKTMSFYLRDSITTWVVLAVSFTPTKGICVAEPYEIRVMKVFFIDLQMPYSVVKNEQVEIRAILHNYV
				NEDIYVRVELLYNPAFCSASTKGQRYRQQFPIKALSSRAVPFVIVPLEQGLHDVEIKASVQEALWSDGVRKKLKVVPEGVQKSIVTIVKLDPRAKGVGGTQLEVIKARKLDDRVPDTEIE
				TKIIIQGDPVAQIIENSIDGSKLNHLIITPSGCGEQNMIRMAAPVIATYYLDTTEQWETLGINRRTEAVNQIVTGYAQQMVYKKADHSYAAFTNRASSSWLTAYVVKVFAMAAKMVAGIS
				HEIICGGVRWLILNRQQPDGAFKENAPVLSGTMQGGIQGAEEEVYLTAFILVALLESKTICNDYVNSLDSSIKKATNYLLKKYEKLQRPYTTALTAYALAAADQLNDDRVLMAASTGRDH
				WEEYNAHTHNIEGTSYALLALLKMKKFDQTGPIVRWLTDQNFYGETYGQTQATVMAFQALAEYEIQMPTHKDLNLDITIELPDREVP
		NKT_CVF01	11-14	ELPDREVPIRYRINYENALLARTVETKLNQDITVTASGDGK	1280-1642
				ATMTILTFYNAQLQEKANVCNKFHLNVSVENIHLNAMGAKGALMLKICTRYLGEVDSTMTIIDISMLTGFLPDAEDLTRLSKGVDRYISRYEVDNNMAQKVAVIIYLNKVSHSEDECLHF
				KILKHFEVGFIQPGSVKVYSYYNLDEKCTKFYHPDKGTGLLNKICIGNVCRCAGETCSSLNHQERIDVPLQIEKACETNVDYVYKTKLLRIEEQDGNDIYVMDVLEVIKQGTDENPRAKT
				HQYISQRKCQEALNLKVNDDYLIWGSRSDLLPTKDKISYIITKNTWIERWPHEDECQEEEFQKLCDDFAQFSYTLTEFGCPT
		Phospholipase A2 (PLA2)
P00596		Acidic phospholipase A2 1	1	MNPAHLLILAAVCVSPLGAFSNRPMPLNLYQFKNMIQCTVPNRSWWDFADYGCYCGRGGSGTPVDDLDRCCQVHDNCYNEAEKISRCWPYFKTYSYECSQGTLTCKGDNDACAAAVCDCD		Naja kaouthia
			2	RLAAICFAGAPYNNNNYNIDLKARCQ
	15	NKM_PLA01	1-2	MNPAHLLILAAVCVSPLGAFSNRPMPLNLYQFKNMIQCTVPSRSWWDFADYGCYCGRGGSGTPVDDLDRCCQVHDNCYNEAEKISRCWPYFKTYSYECSQGTLTCKGDNDACAAAVCDCD	1-146	<2% DIFFER
				RLAAICFAGAPYNNNNYNIDLKARCQ
		NKT_PLA01	1-2	MNPAHLLILAAVCVSPLGAFSNRPMPLNLYQFKNMIQCTVPNRSWWDFADYGCYCGRGGSGTPVDDLDRCCQVHDNCYNEAEKISRCWPYFKTYSYECSQGTLTCKGDNDACAAAVCDCD	1-146
				RLAAICFAGAPYNNNNYNIDLKARCQ
		Snake venom metalloproteinase (SVMP)
D3TTC2		Zinc metalloproteinase-disintegrin atragin	1	MIQALLVIICLAVFPHQGSSIILESGNVNDYEVVYPQKVPALLKGGVQNPQPETKYEDTMRYEFQVNGEPVVLHLERNKGLFSEDYTETHYAPDGREITTSPPVQDHCYYHGYIQNEADS		Naja atra
			2	SAVISACDGLKGHFEHQGETYFIEPLKISNSEAHAIYKDENVENEDETPEICGVTETTWESDESIEKTSQLTNTPEQDRYLQAKKYIEFYVVVDNIMYRHYKRDQPVIKRKVYEMINTMN
			3	MIYRRLNFHIALIGLEIWSNINEINVQSDVRATLNLFGEWREKKLLPRKRNDNAQLLTGIDFNGTPVGLAYIGSICNPKTSAAVVQDYSSRTRMVAITMAHEMGHNLGMNHDRGFCTCGF
			4	NKCVMSTRRTKPAYQFSSCSVREHQRYLLRDRPQCILNKPLSTDIVSPPICGNYFVEVGEECDCGSPADCQSACCNATTCKLQHEAQCDSEECCEKCKFKGARAECRAAKDDCDLPELCT
			5	GQSAECPTDVFQRNGLPCQNNQGYCYNGKCPIMTNQCIALRGPGVKVSRDSCFTLNQRTRGCGLCRMEYGRKIPCAAKDVKCGRLFCKRRNSMICNCSISPRDPNYGMVEPGTKCGDGMV
			6	CSNRQCVDVKTAY
	16	NKM_SMP01	1-4	MIQALLVTICLVVFPYQGSSIILESGNVNDYEVVYPQKVPGLPKGRVQNPQPETKYEDTMQYEFQVNGEPVVLHLERNKGLFSEDYTETHYAPDGREITTSPPVQDHCYYHGYIQNEADS	1-417	>10% DIFFER
				SAVISACNGLKGHFKHQGETYFIEPLKISNSEAHAIYKDENVENEDETPEICGVTETTWESDESIEKTSQLTNTPEQDRYLQAEKYIEFYVIVDNRMYRYYNYDKPAIKIRVYEMINAVN
				TKFRPLKIHIALIGLEIWSNEDKFEVKPAASVTLKSFREWRQTVLLPRKRNDNAQLLTGIDFNGTPVGLAYIGSICNPKTSAAVVQDYSKSTRMVAITMAHEMGHNLGMNHDKGFCTCGF
				NKCVMSTRRTKPAYQFSSCSVREHQEYLLRERPQCILNKPLSTDIVTPPVCGNYFVE
		NKM_SMP02	5-6	CPIMTNQCIALRGPGVKVSRDSCFTLNQRTRGCGLCRMEYGRKIPCAAKDVKCGRLFCKRRNSMICNCSISPRDPNYGMVEPGTKCGDGMV	510-613
				CSNRQCVDVKTAY
		NKT_SMP03	2-6	FIEPLELSESEAHAIYKDENVEEEDETPKICAVTQTTWESDESIEKTSQLTNTPEQDRYLQVKKYIEFYLIVDNKMYKNHTSKQE-LRTRVYEMVNYLN	121-600
				TKYRRLNFHIALIGLEIWSNKDKVDMDPEANVTLKSFAEWREK-LPPHKRNDNAQLLTGIDFNGTPVGLAYIGSICNPKTSAAVVQDYSKSTRMVAITMAHEMGHNLGMNHDKGFCTCGF
				NKCVMSTRRTKPAYQFSSCSVREHQRYLLRDRPQCILNKPSRNAIVSPPICGNYFVEVGEECDCGSPADCQSACCNATTCKLQHEAQCDSEECCEKCKFKGAGAECRAAKDDCDLPELCT
				GQSAECPTDSLQRNGHPCQNNQGYCYNGKCPTLTNQCIALRGPGVKVSRDSCFTLNQRTRGCGLCRMEYGRKIPCAAKDVKCGRLFCKRRNSMICNCSISPRDPNYGMVEPGTKCGDGMV
				CSNRQCVDVKTAY
		Nerve growth factor (NGF)
A59218		nerve growth factor beta chain precursor	1	MVHSVMSMLCYTLIIAFLIGIWAAPKSEDNVPLGSPATSDLSDTSCAQTHEGLKTSRNTDQHHPAPQKAEDQELRTAANIIVDPKLFQKRQFQSPRVLFSTQPPLLSRDEESVEFLDNED		Naja kaouthia
			2	SLNRNIRAKREDHPVHNLGEHSVCDSVSAWVTKTTATDIKGNTVTVMENVNLDNKVYKQYFFETKCKNPNPEPSGCRGIDSSHWNSYCTETDTFIKALTMEGNQASWRFIRIETACVCVI
			3	TKKKGN
	17	NKM_NGF01	1-3	MVHSVMSMLCYTLIIAFLIGIWAAPKSEDNVPLGSPATSDLSDTSCAQTHEGLKTSRNTDQHHPAPQKAEDQELRTAANIIVDPKLFQKRQFQSPRVLFSTQPPLLSRDEESVEFLDNED	1-246	IDENTICAL
				SLNRNIRAKREDHPVHNLGEHSVCDSVSAWVTKTTATDIKGNTVTVMENVNLDNKVYKQYFFETKCKNPNPEPSGCRGIDSSHWNSYCTETDTFIKALTMEGNQASWRFIRIETACVCVI
				TKKKGN
		NKT_NGF01	1-3	MVHSVMSMLCYTLIIAFLIGIWAAPKSEDNVPLGSPATSDLSDTSCAQTHEGLKTSRNTDQHHPAPQKAEDQELRTAANIIVDPKLFQKRQFQSPRVLFSTQPPLLSRDEESVEFLDNED	1-246
				SLNRNIRAKREDHPVHNLGEHSVCDSVSAWVTKTTATDIKGNTVTVMENVNLDNKVYKQYFFETKCKNPNPEPSGCRGIDSSHWNSYCTETDTFIKALTMEGNQASWRFIRIETACVCVI
				TKKKGN
		Kunitz-type protease inhibitor (KSPI)
V8N7R6		Kunitz-type protease inhibitor 1	1	MGRSRSRLQAGLLVTWFFLAGLVLGQEQNGEGASFGETCLAQFTAGFPEFVLDTNASVENGATFLASPPVESSRDCVRACCKNPDCNLALVEQRPGEDSDGIQSCFLLNCLYDQALVCRF		Ophiophagus hannah
			2	AKKDGFLNYIRREVYNAYASVRNLGNPDDLPPKAKAWMDVKVQPKDEPVILSGSESTDDNGIVNYEWTLLSGDSSVVMEKQNDIMKLSNLNEGIYIFQFTVTDTADQQHSINITVTVLNS
			3	DLTV--------VGRCRGSFHRWYYNPEIGQCQDFIFGGCNPNKNNYVRKEECDLACKNVQGAVEKRQEPTCNGNCLPLHFKCEDGCCIDRALECDETPDCQDGSDEKSCDSNSQGFDKL
			4	QNINTSAKGYCVDIPDTGPCKESIPRWYYNPLTEKCSRFTYGGCEGNKNNFEQEETCMKSCRDITKRHMIDQSWRDGYEYQQASLSTFEVAIAVLLCVCIMIALVVLVYFFLKNRKTYRR
			5	RRQPPSAANSTLSSVLSTAEDTEHLVYNSTTKPI
	18	NKM_KPI02	1-5	MGRSRSQLQAGLLVTWFFLAGLVLGQEQNGEGASFGETCLAQFTPGFPEFVLDTNASVENGATFLASPPVGSSRDCVRACCKNPDCNLALVEQSPGEDSNGIQSCFLLDCLYDQALVCRF	1-506	IDENTICAL
				AKKDGFLNYVRREVYNAYATMRNLGNRDDLPPKAKAWMDVKVQPKDEPVILNGSESTDDNGIVNYEWTLLSGDSSVVMEKENDIMKLSNLNEGIYVFQFTVTDTADQQHSINITVTVLNS
				DHTVDHCLAPYKVGRCRGSFHRWYYNPEIGQCQGFIFGGCNPNKNNYVRKEECDLACKNVQGAVEKRQEPTCNGNCLPLHFKCEDGCCIDRALECDETPDCQDGSDEKSCDSYIQGFDKL
				QKINTSAKSYCVDMPDTGPCEESIPRWYYNPSTEKCGRFTYGGCEGNKNNFEQEETCMKSCRGITKQHMIDQRWR-GYEYQQASLSAFEVAIAVLLCVCILIALVVLGYFFLKNRKTYRR
				RRQPPTAANSTLSSVLSTAEDTEHLVYNSTTKPI
		NKT_KPI03	1-5	MGRSRSQLQAGLLVTWFFLAGLVLGQEQNGEGASFGETCLAQFTPGFPEFVLDTNASVENGATFLASPPVGSSRDCVRACCKNPDCNLALVEQSPGEDSNGIQSCFLLDCLYDQALVCRF	1-506
				AKKDGFLNYVRREVYNAYATMRNLGNRDDLPPKAKAWMDVKVQPKDEPVILNGSESTDDNGIVNYEWTLLSGDSSVVMEKENDIMKLSNLNEGIYVFQFTVTDTADQQHSINITVTVLNS
				DHTVDHCLAPYKVGRCRGSFHRWYYNPEIGQCQGFIFGGCNPNKNNYVRKEECDLACKNVQGAVEKRQEPTCNGNCLPLHFKCEDGCCIDRALECDETPDCQDGSDEKSCDSYIQGFDKL
				QKINTSAKSYCVDMPDTGPCEESIPRWYYNPSTEKCGRFTYGGCEGNKNNFEQEETCMKSCRGITKQHMIDQRWR-GYEYQQASLSAFEVAIAVLLCVCILIALVVLGYFFLKNRKTYRR
				RRQPPTAANSTLSSVLSTAEDTEHLVYNSTTKPI
		Neprilysin
XP_007436944		neprilysin-like	1	MAKSESQMDITEMNSPKQKRKLRWSALEIGLAVVVLLLAIVAITMIILYATYDDGICKTPECIKSAAQIIENMDTTVEPCKNFYQYACGGWLKKHIIPETSSRYSNFDILRDELEVVLKD		Python bivittatus
			2	VLEKKDSNDIEAVTKAKTLYRSCINEAAIDRKAGKPLINLMTNFSEWPIATDNWDHDYGLTWSAETSIAKLISQLGRKIIINMFVGTDDKNSSQHVIHIDQPGLGLPSRDYYECTGMYEE
			3	ACSAYVNFMISVAKLIRQERKLPINDTQISMEAKRIMSLEKEIANATTKADDRNDPLLLYHKMKLSDVQKNFSLEISNQPFDWLKFINNIMSTVQINVQNTEDIIVYAPEYLTKLNSILY
			4	KYSPREIQNYLSWRYIMDMVSSLSRDYKDTRNNFRKVLYGTTSDAASWRRCANYVNSVMWNAVGRLYVAEAFAGESKHVVQEMITQIREVFIKTLEELSWMDAETKKKAEQKATAIRERI
			5	GYPDEIMTDPNKLNQEYKDLNYSEEEYFENMIKNLKFGQKEGLKKLREKVNKEEWISGAAVVNAFYSASRNQIVFPAGILQPPFFSASQPKSLNYGGIGMVIGHEITHGFDDNGRNFNAD
			6	GDLVDWWTQESAKNFKSQSQCMVYQYGNFTWDLAGGQNLSGINTLGENIADNGGIRQAYRAYESFVQKNGEEKLLPGLDFSHKQLFFLNFAQVWCGTYRPEYALSSIKTDVHSPGKFRVL
			7	GTLQNNPEFSEAFKCTDKDYMDPVKKCRVW
	19	NKM_NEP02	1-2	MAKSESQMDITEMNSPKPKRKLRWSPLEIGLAAVVLLLAVVAITMIILYATYDDGICKTSDCIKSAARIIENMDTAAEPCNNFYQYACGGWLKKHIIPETSSRYSNFDILRDELEVVLKD	1-168	IDENTICAL
				VLEKKESNDIEAVAKAKMLYRSCINETAINSKKGKPLINLMTNISEWP
			2-4	MTNISEWPIAADNWDLNHGSTWSAEESIAELNFQFGRKVIINMFVGTDDKNSLQHILHVDQPRLGLPSRDYYECTGLYTE	161-380
		NKM_NEP01		ACSAYISFMTSVAKLIRQERKLSINDTEISTEVERIMALEKEIASITTKDEDRNDPLLLYHKMKLSDLQKNFSFEINNQTFDWLKFVNYIMKTVAIEVKNTEDIIVYAPEYLIKLKSVIC
				NYTAREIQNYISWRYIMDMV
		NKM_NEP03	4-7	RYIMDMVSSLSRDYKDTRNNFRKVLYGTTSDAAIWRRCANYVNSIMGNAVGRLYVQEAFAGESKHVVQEMITQIREVFIKTLEELSWMDAETKKKAEDKAVAIKERI	374-750
				GYPDEILTNTEKLNKEYQGLTYKEEEYFENLIENLRFAQKERLKKLREKVDKDEWITGAAVVNAFYSPSRNQIVFPAGILQPPFFSASQPKSLNFGGIGMVIGHEITHGFDDNGRNFNAE
				GDLIDWWSQESANNFKSQSQCMIYQYGNFSWDLAAGQNLSGINTLGENIADNGGIRQAYRAYESYVQKNGEEKRLPGLDLNHKQLFFLNFAQVWCGTYRPEYAVNSIKTDVHSPGKFRVL
				GSLQNNLEFSEAFKCTDKDYMDPVKKCRVW
		NKT_NEP01	1-7	MAKSESQMDITEMNSPKPKRKLRWSPLEIGLAAVVLLLAVVAITMIILYATYDDGICKTSDCIKSAARIIENMDTAAEPCNNFYQYACGGWLKKHIIPETSSRYSNFDILRDELEVVLKD	1-750
				VLEKKESNDIEAVAKAKMLYRSCINETAINSKKGKPLINLMTNISEWPIAADNWDLNHGSTWSAEESIAELNFQFGRKVIINMFVGTDDKNSLQHILHVDQPRLGLPSRDYYECTGLYTE
				ACSAYISFMTSVAKLIRQERKLSINDTEISTEVERIMALEKEIASITTKDEDRNDPLLLYHKMKLSDLQKNFSFEINNQTFDWLKFVNYIMKTVAIEVKNTEDIIVYAPEYLIKLKSVIC
				NYTAREIQNYISWRYIMDMVSSLSRDYKDTRNNFRKVLYGTTSDAAIWRRCANYVNSIMGNAVGRLYVQEAFAGESKHVVQEMITQIREVFIKTLEELSWMDAETKKKAEDKAVAIKERI
				GYPDEILTNTEKLNKEYQGLTYKEEEYFENLIENIRFAQKERLKKLREKVDKDEWITGAAVVNAFYSPSRNQIVFPAGILQPPFFSASQPKSLNFGGIGMVIGHEITHGFDDNGRNFNAE
				GDLIDWWSQESANNFKSQSQCMIYQYGNFSWDLAAGQNLSGINTLGENIADNGGIRQAYRAYESYVQKNGEEKRLPGLDLNHKQLFFLNFAQVWCGTYRPEYAVNSIKTDVHSPGKFRVL
				GSLQNNLEFSEAFKCTDKDYMDPVKKCRVW
		Snake venom C-type lectin/lectin-like protein (snaclec)
Q90WI8		C-type lectin BFL-1	1	MGHFTFIGLCLLAMFLSLSGAECYTCPIDWLPKNGLCYKVFSKHKTWFDAEMYCRKFKPGCHLASLHSNADAVEFSEYISDYLTGQGHVWIGLRDTKKKYIWEWTDRSRTDFLPWRKKQP		Bungarus fasciatus
			2	DHFNNNEFCVEIVNFTGYLQWNDDNCAALRPFLCQCKY
	20	NKM_SCL01	1-2	MGHFTFTSLCLLAVFLSLSGAEGYNCPLDWLPKNGLCYKVFSTPKSWLKAEMHCRKFKPGCHLASLHSNSDAVEFSEYISDYLTGQGHVWIGLRDRTKKYIWEWTDRSKTDFLQWKKKQP	1-158	IDENTICAL
				DHFKNNEFCVEIVKFTGYLQWNDENCAALRPFLCQCKY
		NKT_SCL01	1-2	MGHFTFTSLCLLAVFLSLSGAEGYNCPLDWLPKNGLCYKVFSTPKSWLKAEMHCRKFKPGCHLASLHSNSDAVEFSEYISDYLTGQGHVWIGLRDRTKKYIWEWTDRSKTDFLQWKKKQP	1-158
				DHFKNNEFCVEIVKFTGYLQWNDENCAALRPFLCQCKY
Q90WI7		C-type lectin BFL-2	1	MGHFTFIGLCLLAMFLSLSGAECYTCPIDWLPKNGLCYKVFSNPKSWLDAEMFCRKFKPGCHLASIHRDADSADLAEYVSDYLKDDGNVWIGLNDPQKKRTWVWSDRSSSNYFSWNQGEP		Bungarus fasciatus
			2	NNSKNKEYCVHLWAPTGYLKWNDAPCETLHPFICQCKY
	21	NKM_SCL02	1-2	-------------FLSLSGAECYNCPIDWLSRNGLCYKLFNTPKSWLDAEMFCRKFKPGCHLVSIHSVAESADLAEYVSDYLQGDGFVWIGLNDPRKQRIWEWSDRSSTNYFSWNQGEP	15-158	<2% DIFFER
				NNSKNKEYCVHLWSPTAYRKWNDTPCESLYPFICQCKF
		NKT_SCL03		-------------FLSLSGAECYNCPIDWLSRNGLCYKLFNTPKSWLDAEMFCRKFKPGCHLVSIHSVAESADLAEYVSDYLQGDGFVWIGLNDPRKQRIWEWSDRSSTNYFSWNQGEP	15-158
				NNSKNKEYCVHLWAPTAYRKWNDTPCESLYPFICQCKF
		Cystatin
V8NBS6		hypothetical protein L345_15265		MLSPQLLTVNAQDLYDAPINHPYVQKALAFAVEQYNLDNEESANYFKVLRLLKTQWK HLAAVAVPTKDTSAISDGFSSLELGHS		Ophiophagus hannah
	22	NKM_CYS01		MGRSQLPLPSLLSLFSALLMLSPQLLRVNAQDLYDAPINHPYVQKALAFAVERYNLDNEESANYFKVMQVLKTQWKMSNRVEYHLTVELVKTKCKKEIGKIKQYKKIQECKVLQGNHKRP	1-74	IDENTICAL
				NCHFAVVPHPLPIEMNVEVSVC
		NKT_CYS01		MGRSQLPLPSLLSLFSALLMLSPQLLRVNAQDLYDAPINHPYVQKALAFAVERYNLDNEESANYFKVMQVLKTQWKMSNRVEYHLTVELVKTKCKKEIGKIKQYKKIQECKVLQGNHKRP	1-74
				NCHFAVVPHPLPIEMNVEVSVC
E3P6P4		cystatin	1	MVHFQLPVAAPLCLLCALLLLPSATMIPGGLSPRSVSDPDVQKAAAFAVQEYNARSANAHYYKELRVVEAQSQVVAGEKYYLMMELVKTKCAKTAGKPKVYKEIQNCELPPKAQQEKLTC		Naja kaouthia
			2	HFQVWSRPWLDKTELTKMSCN
	23	NKM_CYS02	1-2	MVHFQLPVAAPLCLLCALLLLPSATMIPGGLSPRSVSDPDVQKAAAFAVQEYNARSANAHYYKELRVVEAQSQVVAGEKYYLMMELVKTKCAKTAGKPKVYKEIQNCELPPKAQQEKLTC	1-141	IDENTICAL
				HFQVWSRPWLDKTELTKMSCN
		NKT_CYS02	1-2	MVHFQLPVAAPLCLLCALLLLPSATMIPGGLSPRSVSDPDVQKAAAFAVQEYNARSANAHYYKELRVVEAQSQVVAGEKYYLMMELVKTKCAKTAGKPKVYKEIQNCELPPKAQQEKLTC	1-141
				HFQVWSRPWLDKTELTKMSCN
V8NX38		Cystatin-C	1	GWLQWKTKTRNAGRQAANTARRRFGWEVGAACGGKMALLRGLVVCSVLLLSCICKQALATRLLGGRENASPEEPDVQAALQFAMNEYNRRSNDMYASRVSEVVEVQKQIVSGIKYYFTVK		Ophiophagus hannah
			2	IGRTVCRKGASGLENCAFHNTPKLAQTMTCTFEVYKVPWRNMISLQKSSCT
	24	NKM_CYS03	1-2	----------------------------------MALLRGLLVCSVLLLSCICKQALGTRLIGGREDASPEEPGVRAALQFAMNEYNRGSNDMYASRVSEVVQVQKQIVSGIKYYFTVK	36-170	<2% DIFFER
				IGRTVCRKESSDLENCAFHSTPKLAQTMTCIFEVYNIPWRNSISLLKSSC
		NKT_CYS04	1-2	----------------------------------MALLRGLLVCSVLLLSCICKQALGTRLIGGREDASPEEPGVRAALQFAMNEYNRGSNDMYASRVSEVVQVQKQIVSGIKYYFTVK	36-170
				IGRTVCRKESSDLENCAFHSTPKLAQTMTCTFEVYNIPWRNSISLLKSSC
		L-amino-acid oxidase (LAAO)
A8QL58		L-amino-acid oxidase	1	MNVLFIFSLLFLAALESCADDRRSPLEECFQQNDYEEILEIARNGLKKTSNPKHVVVVGAGMAGLSAAYVLAGAGHKVTLLEASERVGGRVITYHNDREGWYVNMGPMRLPERHRIVREY		Naja atra
			2	IRKFGLKLNEFFQENENAWYYINNIRKRVWEVKKDPSLLKYPVKPSEEGKSASQLYQEPLRKVIEELKRTNCSYILNKYDSYSTKEYLIKEGNLSRGAVDMIGDLLNEDSSYHLSFMESL
			3	KSDALFSYEKRFDEIVGGFDQLPISMYQAIAEMVHLNARVIKIQYDAEKVRVTYQTPAKTFVTADYVIVCSTSRAARRIYFEPPLPPKKAHALRSIHYRSATKIFLTCSKKFWEADGIHG
			4	GKSTTDLPSRFIHYPNHNFTSGIGVIMAYVLADDSDFFQALDTKTCADIVINDLSLIHDLPKREIQALCYPSIKKWNLDKYTMGSITSF
	25	NKM_LAO01	1-4	MNVFFIFSLLFLAALESCADDRRSPLEECFQQNDYEEFLEIARNGLKKTSNPKHVVVVGAGMAGLSAAYVLAGAGHKVTLLEASERVGGRVVTYHNDREGWYVNMGPMRLPERHRIVREY	1-449	IDENTICAL
				IRKFGLQLNEFFQENENAWYYINNIRKRVWEVKKDPSLLKYPVKPSEEGKSASQLYQESLTKVIEELKRTNCSYILNKYDSYSTKEYLIKEGNLSRGAVDMIGDLLNEDSSYHLSFIESL
				KSDALFSYEKRFDEIVGGFDQLPISMYQAIAETVHLNARVIKIQYDAEKVRVTYQTPAKTFVTADYVIVCSTSRAARRIYFEPPLPPKKAHALRSIHYRSATKIFLTCSKKFWEADGIHG
				GKSTTDLPSRFIHYPNHNFTTGIGVIMAYVLADDSDFFQALDTKTCADIVINDLSLIHDLPKREIQALCYPSIKKWNLDKYTMGSITSFTPYQFQDYFESAAAPVGRIHFAGEYTGRFHG
				WIDSTIMTGLRAARDVNRASQKPSKIRLISDNQL
		NKT_LAO01	1-4	MNVFFIFSLLFLAALESCADDRRSPLEECFQQNDYEEFLEIARNGLKKTSNPKHVVVVGAGMAGLSAAYVLAGAGHKVTLLEASERVGGRVVTYHNDREGWYVNMGPMRLPERHRIVREY	1-449
				IRKFGLQLNEFFQENENAWYYINNIRKRVWEVKKDPSLLKYPVKPSEEGKSASQLYQESLTKVIEELKRTNCSYILNKYDSYSTKEYLIKEGNLSRGAVDMIGDLLNEDSSYHLSFIESL
				KSDALFSYEKRFDEIVGGFDQLPISMYQAIAETVHLNARVIKIQYDAEKVRVTYQTPAKTFVTADYVIVCSTSRAARRIYFEPPLPPKKAHALRSIHYRSATKIFLTCSKKFWEADGIHG
				GKSTTDLPSRFIHYPNHNFTTGIGVIMAYVLADDSDFFQALDTKTCADIVINDLSLIHDLPKREIQALCYPSIKKWNLDKYTMGSITSFTPYQFQDYFESAAAPVGRIHFAGEYTGRFHG
				WIDSTIMTGLRAARDVNRASQKPSKIRLISDNQL
		Vespryn
P82885		Thaicobrin	1	SPPGNWQKADVTFDSNTAFESLVVSPDKKTVENVGVSQVAPDNPERFDGSPCVLGSPGFRSGKHFFEVKYGTQREWAVGLAGKSVKRKGYLRLVPEERIW		Naja kaouthia
			2	QKGLWWLG
	26	NKM_VES01	1-2	MLLFTLCLFADQENGGKALASPPGNWQKADVTFDSNTAFESLVVSPDKKTVENVGVSQVAPDNPERFDGSPCVLGSPGFRSGKHFFEVKYGTQREWAVGLAGKSVKRKGYLRLVPEERIW	1-108	IDENTICAL
				QKGLWWLGRLETDSDKLQKSSGKIIVFLDYDKGKVIFDLDGKVTTLQASFNGEEVVPFYYLGASVSLTNL
		NKT_VES01	1-2	MLLFTLCLFADQENGGKALASPPGNWQKADVTFDSNTAFESLVVSPDKKTVENVGVSQVAPDNPERFDGSPCVLGSPGFRSGKHFFEVKYGTQREWAVGLAGKSVKRKGYLRLVPEERIW	1-108
				QKGLWWLGRLETDSDKLQKSSGKIIVFLDYDKGKVIFDLDGKVTTLQASFNGEEVVPFYYLGASVSLTNL
		Phosphodiesterase (PDE)
U3FAB3		phosphodiesterase	1	MIMQKVLFISLVAVALGLGLGLGLKQSKQPQESCRNRCNETFRGELSYCSCDNKCTEREACCWDYQDICVLPTQSWSCNKLRCGERRMANVLCSCSEDCLTKKDCCTDYKSICKRETSWL		Micrurus fulvius
			2	KDQCASSSAAQCPEGFDQSPLILFSMDGFRAEYLETWDTLMPNINKLKTCGTHAKYMRAVYPTKTFVNHYTIVTGLYAETHGIIDNNIYDVNLNQNFSLSGRNMRNPAWWGGQPIWNTAT
			3	YQGLKAATYFWPGSEVKINGSYPAIYKAYNKSTPFEARVMEVLQWLDLPRAKRPDFSTLYIEEPDTTGHKYGPVSGQVIKSLQMADRTLGMLMEGLKQRNLHNCVNLILLADHGMEAISC
			4	NRLEYMADYFNTVDFFMYEGAAPRIRSKNVPKDFYTFDSEAIVKNLTCRKPKQHFKAYLAKDLPKRLHFANNVRIDKVNLMVDRQWLAVRNKKYKYCSGGTHGYDNEFKSMEAIFLAHGP
			5	DFKEKNEVTSFENIEVYNLMCDLLKLKPAPNNGTHGSLNHLLKNPFYNPSPAKEQSSPLLCDFGPVPSPDLSGCKCSSITDLEAVNQRLNLNDQAKTQCEADNLPYGRPHVLQHSKYCLL
			6	HQTKYISAYSQDILMPLWNSYTISKSLVKPTSVPPSASDCLRLDVRIPTAQSQTCSNYQPDLTITPGFLYPPDFSSSGPEQYDALITSNIVPMYKEFTRLWNYFHSTLLPKYATERNGLN
			7	VISGPIFDYNYDGHFDSYDTIKQYVNNTKIPIPTHYFVVLTSCENSTNTPLNCPPGSLKVLSFILPHRPDNSESCADKSPNNLWVEERMQTHTARVRDVELLTGLDFYSVLKQPLSETLR
			8	LKTFLPIFVNSVN
	27	NKM_PDE01		KKVLFISLVAVALGLGLGLGLKQSKQPLESCRNRCNETFSEELSYCSCDNKCTERKACCWDYQDTCVLPTQSWSCNKLRCGEKRMANVLCSCSEDCLTKKDCCTDYKSICKRETSWL	4-851	<2% DIFFER
				KDQCASSSASQCPEGFDQSPLILFSMDGFRAEYLETWDTLMPNINKLKTCGTHAKYMRAVYPTKTFVNHYTIVTGLYAETHGIIDNNMYDVKLNQNFSLSGSNMRNAAWWGGQPIWHTAS
				YQGLKAATYFWPGSEVKINGSYPTIYKVYNKSTPFEARVMEVLKWLDLPKAKRPDFSTLYIEEPDTTGHKFGPVSGQVIKSLQMADRTLGMLMEGLKQRNLHNCVNLILLADHGMEAISC
				NRLEYMTDYFNTVDFFMYEGAAPRIRSKNVPKDFYTFDSEAIVKKLTCRKPKQHFKAYLAKDLPKRLHFANNIRIDKVNLMVDRQWLAVRNKKYKYCSGGTHGYDNEFKSMEAIFLAHGP
				GFKEKTEVTSFENIEVYNLMCDLLKLKPAPNNGTHGSLNHLLKNPFYNPSPAKEQSPPLYCLFGPVPSPDVSGCKCSSITDLEAVNQRLNLIDQAKMQSEADNLPYGRPHVLQHSKYCLL
				HQTKYISAYSQDILMPLWNSYTISKSLVKPTSAPPSASDCLRLDVRIPTVQSQTCSNYQPDLAITPGFLYPPDFSSSGPEQYDALITSNIVPMYKEFARLWNYFHSTLLPKYATERNGLN
				VISGPIFDYNYDGHFDPYDTIDQYVNNTKIPIPTHYFVVLTSCENSTKTPLNCPPGSLKVLSFILPHRPDNSESCADKSPDNLWVEERMQTHTARVRDVELLTGLDFYSALKQPLSETLR
				LKTFLPIFINSVN
		NKT_PDE01		KKVLFISLVAVALGLGLGLGLKQSKQPLESCRNRCNETFSEELSYCSCDNKCTERKACCWDYQDICVLPTQSWSCNKLRCGEKRMANVLCSCSEDCLTKKDCCTDYKSICKRETSWL	4-851
				KDQCASSSASQCPEGFDQSPLILFSMDGFRAEYLETWDTLMPNINKLKTCGTHAKYMRAVYPTKTFVNHYTIVTGLYAETHGIIDNNMYDVKLNQNFSLSGSNMRNAAWWGGQPIWHTAS
				YQGLKAATYFWPGSEVKINGSYPTIYKVYNKSTPFEARVMEVLKWLDLPKAKRPDFSTLYIEEPDTTGHKFGPVSGQVIKSLQMADRTLGMLMEGLKQRNLHNCVNLILLADHGMEAISC
				NRLEYMTDYFNTVDFFMYEGAAPRIRSKNVPKDFYTFDSEAIVKKLTCRKPKQHFKAYLAKDLPKRLHFANNIRIDKVNLMVDRQWLAVRNKKYKYCSGGTHGYDNEFKSMEAIFLAHGP
				GFKEKTEVTSFENIEVYNLMCDLLKLKPAPNNGTHGSLNHLLKNPFYNPSPAKEQSPPLYCLFGPVPSPDVSGCKCSSITDLEAVNQRLNLIDQAKMQSEADNLPYGRPHVLQHSKYCLL
				HQTKYISAYSQDILMPLWNSYTISKSLVKPTSAPPSASDCLRLDVRIPTVQSQTCSNYQPDLAITPGFLYPPDFSSSGPEQYDALITSNIVPMYKEFARLWNYFHSTLLPKYATERNGLN
				VISGPIFDYNYDGHFDPYDTIDQYVNNTKIPIPTHYFVVLTSCENSTKTPLNCPPGSLKVLSFILPHRPDNSESCADKSPDNLWVEERMQTHTARVRDVELLTGLDFYSALKQPLSETLR
				LKTFLPIFINSVN
		Aminopeptidase (AP)
B6EWW5		aminopeptidase N	1	MAKGFFISKSLGVVGLVLGLGAVATIIALSVVYSQEKQRADD-LSNQVPSSTSAAVAPGTTIAGTAQTTTANGSVQTTTANGSVQATTTKTLEPWDHMRLPKTLMPTFYNISLQPFLTEV		Gloydius brevicaudus
			2	GPNFYIFKGNSTVEFQCKQPTDLILIHSKKLNYTMQGAFHVSLTGIGVTPPAIHSTWLEEKTEYLVVKLKENLQQNKNYQLHAVFTGELADDLAGFYRSAYTEGDKAKLLATTQMQAADA
			3	RKAFPCFDEPAMKANFSITLIHLPDYKALSNMPIKSAEQVTMPDGAIWTRTEFHPTLKMSTYLLAFIVSEFENVSAIENNILIQIWGRPNAIMEGQGAYALNVTGPILRFFEREYRVPYP
			4	LTRLDQVALPDFNAGAMENWGLITYRESALLFDEQYSSIGNKERIVTVIAHEVAHQWFGNLVTLEWWNELWLNEGFASYVEYLGAHEAEPTWNIKDLIVPNDVYRVMAIDALASSHPLSS
			5	PAEEINTPAQISEVFDSISYSKGASVIRMLSEFLTEAVFREGLQTYFETYQYGNTVCDDLWEQLQKAVNKN-VSLPSTVKTIMDRWTLQMGFPVLTVNTSTGIISQKHFLLDPESPVERP
			6	SPFNYIWIVPVSWLSKGKEAEMYWLTDTNAENVNFSTSADPTQWLLLNVNVTGYFRVNYDLENWQRLMNQLNKDLQEIPVLNRAQIIDDAFNLARAKHVGTDLALNTTRYLGLEREYLPW
			7	DTALDNLDYFRLMFDRSEVYGPMQRYIRKQVTPLFEHFRNLTLNWNEIPDGLMNQYNQILAIRTACSYGVPGCNELASSWFEAWKNNSNINLISPNLRSAVYCSAIRTGSPEDWDFVWEM
			8	FRKAPVISEADKLRAALTCSQTPWILQRYLRYTLDPSKIRRQDAMSTINSIASNVVGQPLAWDFVRMNWKTLFQQFGRSSFSFSSLIQSVTQRFSSPFELQQLEQFKKDNEDVGFGSATR
			9	ALEQALERTKANIKWVAENKALVLKWFQDNS
	28	NKM_AP01	5-9	IMDRWTLQMGFPVLTVNTTTGTITQKHFLLDPESPVERP	560-988	IDENTICAL
				SQFNYIWIVPVSWLSTGREAEMYWLTETSAQNANFSISADPAQWLLLNINVVGYFRVNYDLANWKKLMSQLNVDLQKIPVLNRAQIIDDAFNLARAKYVGTDLALTTTRYLAQEREYLPW
				DTALDNLDYFRLMFDRSEVYGPMQKYIRKQVTPLFDHFGNVTHNWTKIPDDLMNQYNQILAIRTACFYDVPECNELASSWFEAWKANSTVNRIPPNLRSAIYCSAIRTGGQEAWDFVWMM
				FLQPQVISEADRLRSALTCSQVPWLLQRYLQYTLNSSLIRRQDATSTINSIASNVVGQSLAWDFVRMNWRTLFQQFGGSSFSFSSLIQSVTKRFASPFELQQLEQFKKDNADVGFGSATR
				ALEQALERTKANIKWVAENKPLVLQWFEDN
		NKT_AP01	5-9	IMDRWTLQMGFPVLTVNTTTGTITQKHFLLDPESPVERP	560-988
				SQFNYIWIVPVSWLSTGREAEMYWLTETSAQNANFSISADPAQWLLLNINVVGYFRVNYDLANWKKLMSQLNVDLQKIPVLNRAQIIDDAFNLARAKYVGTDLALTTTRYLAQEREYLPW
				DTALDNLDYFRLMFDRSEVYGPMQKYIRKQVTPLFDHFGNVTHNWTKIPDDLMNQYNQILAIRTACFYDVPECNELASSWFEAWKANSTVNRIPPNLRSAIYCSAIRTGGQEAWDFVWMM
				FLQPQVISEADRLRSALTCSQVPWLLQRYLQYTLNSSLIRRQDATSTINSIASNVVGQSLAWDFVRMNWRTLFQQFGGSSFSFSSLIQSVTKRFASPFELQQLEQFKKDNADVGFGSATR
				ALEQALERTKANIKWVAENKPLVLQWFEDN
		Snake venom serine protease (SVSP)
Q5MCS0		Serine protease harobin	1	MPLIRVLASLLILQLSYGKSLDNGAKAITSLDRIIGGFECNPSEHRSLVYLYNSAGFFCSGTLLNHEWVLTAAHCNREDIQIRLGVHNVHVHYEDEQIRVPKEKLCCLSTNNCTQFSQDI		Hydrophis hardwickii
			2	MLIRLNSPVNYSEHIAPLSLPSNPPSMGSVCCVMGWGTITSPEVTYPEVPHCVDINILHIPVCQAAYPTMSGKNILCAGILEGGKDSCKGDSGGPLICNGQIQGIVSWGRFPCAQFLEPG
			3	IYTKVFDYKDWIEGIIAGNSNVICP
	29	NKM_SSP01	1-3	MALIGVLANLLILQLSY---------AIIPFDRIIGGFECNEHEHRSLVYLYNSAGFFCAGTLLNHEWVLTAAHCNREDIRIKLGVHNVHVHYEDEQIRVPKEKLCCLSTNNCTQLSQDI	1-265	IDENTICAL
				MLIRLNSSVNYSEHIAPLSLPSNAPRMGSFCRVMGWGLTTSPEVIYPKVPHCVDINILHIPVCQAAYPAMPKKNVLCAGILEGEKDSCQGDSGGPLICNGQIQGTVSWGRFPCAQLLEPG
				VYTKVFDYTKWIKGIIAGNTNVICP
		NKT_SSP01	1-3	MALIGVLANLLILQLSY---------AIIPFDRIIGGFECNEHEHRSLVYLYNSAGFFCAGTLLNHEWVLTAAHCNREDIRIKLGVHNVHVHYEDEQIRVPKEKLCCLSTNNCTQLSQDI	1-265
				MLIRLNSSVNYSEHIAPLSLPSNAPRMGSFCRVMGWGLTTSPEVIYPKVPHCVDINILHIPVCQAAYPAMPKKNVLCAGILEGEKDSCQGDSGGPLICNGQIQGTVSWGRFPCAQLLEPG
				VYTKVFDYTKWIKGIIAGNTNVICP
		Waprin
B5G6G8		Scuwaprin-a		MSSGGLLLLLGLLTLWAELTPVSGQDRPKKPGLCPPRP--QKPPCVKECKNDWSCPGQQKCCSYGCIDECRDPIFVN		Oxyuranus scutellatus scutellatus
	30	NKM_WAP01		LLLLLGLLTLLAEMPPSMGQ--AEKPGSCPKLPPGRITICTLYCRYDWQCPRREKCCTYGCTAVCKDPV	17-72	IDENTICAL
		NKT_WAP01		LLLLLGLLTLLAEMPPSMGQ--AEKPGSCPKLPPGRITICTLYCRYDWQCPRREKCCTYGCTAVCKDPV	17-72
		Phospholipase B (PLB)
F8J2D3		Putative phospholipase B 81b	1	MVRFGSAASSDNRRRRCWSWYWGGLLLLWAVAETRADLHYATVYWLEAEKSFQVKDLLDKNGDAYGYYNDTVQSTGWGILEIKAGYGSQLVSNEILMYAAGFLEGYLTASRMSDHVANLY		Drysdalia coronoides
			2	HQMIKNVITEQKVKDFMQKQDEWTRQQIKNNKDDPFWRNAGYIIAQLDGLYMGNLEWAKRQKRTPLTKFEISFLNALGDLLDLIPALSPESRNNGFLSMSEISKMYEWDMGHCSALIKVL
			3	PGYENIYFAHSSWFTYAATLRIYKHLDFRIIDPQTKTGRASFSSYPGLLASLDDFYILGSGLIMLQTTNSVFNISLLQQVVPESLFAWERVRIANMMADSGKTWAQTFKKQNSGTYNNQY
			4	MILDTKKIKLRRSIEDGTLYIIEQVPNLVEYSDQTTILRKGYWPSYNIPFHKVIYNMSGYREYVQKYGLDFSYEMAPRAKIFRRDQGKVIDIESMKRIMRYNNYKKDPYTKHNPCNTICC
			5	RQDLYYMTPVPAGCYDSKVADINMAAKFTAYAINGPPVEKGLPIFSWVHFNETTHQGLPESYNFDFVTMKPVL
	31	NKM_PLB01	1-5	MVRFGSASSSDNRRQRRWSWYCGGLLLLWAVTETRADVHYATVYWLKAEKSFQIKDLLDRNGDAYGYYNDTVQSTGWGILEIKAGYGSQLVSNEILMYAAGFLEGYLTASHMSDHITNLY	1-553	IDENTICAL
				HQLIKNVIIEQKVKDFMQKQDEWTRQQIKNNKDDPFWRNAGYIIAQLDGLYMGNLEWAKRHKRTPLTEFEVSFLNAIGDLLDVIPALSPESRNNDFLSMSEVSNMYQWDMGHCSALIKVL
				PGYENIYFAHSSWFTYAATLRIFKHWDFRITDPQTKTGRASFSSYPGLLISLDDFYMLGSGLIMLQTTNSVFNLSLLKQVVPESLLAWERVRIANMMADSGKTWAQTFEKQNSGTYNNQY
				MILDTKKIKLRRSIEDGTLYIIEQVPNLVEYSDQTTILRKGYWPSYNIPFHNAIYNMSGYREYVQKYGLDFSYEMAPRAKIFRRDQGKVTDIESMKHIMRYNNYKKDPYAKHNPCNTICC
				RQDLNYKTPVPAGCYDSKVADINMAAKFTVYAINGPPVEKGLPIFSWVHFNKTTHQGLPESYNFDFVTMKPVL
		NKT_PLB01	1-5	MVRFGSASSSDNRRQRRWSWYCGGLLLLWAVTETRADVHYATVYWLKAEKSFQIKDLLDRNGDAYGYYNDTVQSTGWGILEIKAGYGSQLVSNEILMYAAGFLEGYLTASHMSDHITNLY	1-553
				HQLIKNVIIEQKVKDFMQKQDEWTRQQIKNNKDDPFWRNAGYIIAQLDGLYMGNLEWAKRHKRTPLTEFEVSFLNAIGDLLDVIPALSPESRNNDFLSMSEVSNMYQWDMGHCSALIKVL
				PGYENIYFAHSSWFTYAATLRIFKHWDFRITDPQTKTGRASFSSYPGLLISLDDFYMLGSGLIMLQTTNSVFNLSLLKQVVPESLLAWERVRIANMMADSGKTWAQTFEKQNSGTYNNQY
				MILDTKKIKLRRSIEDGTLYIIEQVPNLVEYSDQTTILRKGYWPSYNIPFHNAIYNMSGYREYVQKYGLDFSYEMAPRAKIFRRDQGKVTDIESMKHIMRYNNYKKDPYAKHNPCNTICC
				RQDLNYKTPVPAGCYDSKVADINMAAKFTVYAINGPPVEKGLPIFSWVHFNKTTHQGLPESYNFDFVTMKPVL
		Dipeptidylpeptidase IV (DPP IV)
A6MJH7		venom dipeptidylpeptidase IV	1	MKTVVKCLLGLLALGVIITAIVVPVVLLTRDDSDTRRKFSLEDYLNNDFQYKSYNVRWMSGHEYVYTNQNNVFLYNIDDGKESIILSNNTLENWNNSVAILSPDKNFALLRYSYEKVWRH		Pseudechis australis
			2	SYTASYHIYDLNNRTIITENPLPTTIQYISWSPAGHKLAYVYRNNVYVKTTPNAKPVEITENGAENKILNGLADWVYEEEMFGTHSALWWSPSGRFLAFAEINDTEVPLIEYSFYSEDTL
			3	QYPKTIKIPYPKAGATNPTIRLFVVDILTLPQKNISEIVAPSSIISGDHYLSVVTWVTDERICLQWLRRIQNFSMLTICDYSSNVWQCPKNREHLEESKTGWVGRFQPSEPYFASDKISY
			4	YKIISDSQGYNHIHYTDSTGNVKPITSGKWEVISIAAVTNNSLYFISNEFDGRPGGRHLYKVDLKHDLKKTCITCDPNEEACQYFSVSFSTDARYYKLNCYGPGLPYFTLQNSKTDKAIK
			5	NLENNDNLKNVLKEIQMPSKRLRNITLRGQTYWYQMILPPNFDESKKYPLLIDVYAGPCSQKADAAFRINWSTYLASSEGIIVASFDGRGSGFQGDKILHAIYRRLGTYEVEDQISAAKL
			6	FSEMSFVDKDRMAIWGWSYGGYVTSMALGAGSGVFKCGIAVAPVSRWQYYDSIYTERYMGLPEKNDNLYFYENSTVMARAENFQMVDYLLIHGTADDNVHFQQAAQISKALVDAQVDFQA
			7	MWYTDKDHGIEGHAHSHIYHHMSHFIKRCFKLP
	32	NKM_DPP01	1-7	MKTVLKCLLGLLALGVIITAIVVPIVLLTRDDTDTRRKFTLEDYLNNDFQYKSYNVRWMSGHEYVYTNQNNVFLYNIDDGKESIILSNNTLEDWNNSVAILSPDKKFALLRYNYEKVWRH	1-753	IDENTICAL
				SYTASYHIYDLNNRTIITENPLPETIQYISWSPAGHKLAYVYSNNIYVKTTPNAKPVEITENGAENKILNGLSDWVYEEEMFGTHCALWWSPNGSFLAFAEINDTEVPLIEYSFYSEDTL
				QYPKTIKIPYPKAGAINPTIRLFVVNILALPEKNISKIVAPSSITSGDHYLSVVTWVTDERICLQWLRRIQNFSVLTICDYSSGVWQCPKDREHLEESKTGWVGRFQPSEPYFASDKISY
				YRIISDSQGYKHIHYTDSTGKVKPITSGKWEVIDIAAVTNNSLYFISNEFDGRPGGRHLYKVDLKQDLKKTCITCDSNEEACQYFSVSFSTDARYYKLNCYGPGLPYFTLQNSSTDKAIK
				ILENNDNLKNVLKEIQMPSKRLRNITLHGQTYWYQMILPPNFDESKKYPLLIDVYAGPCSQKADAAFRINWSTYLASSEGIIVASFDGRGSGFQGDKILHAIYRRLGTYEVEDQISAAKL
				FSEMSFVDKDKMAIWGWSYGGYVTSMVLGAGSDVFKCGIAVAPVSRWQYYDSIYTERYMGLPEKNDNLHFYENSTVMARAKNFESVGYLLIHGTADDNVHFQQAAQISKALVDAQVDFQA
				MWYTDKDHGIDGHAHNHIYHHMSHFIKQCFKLP
		NKT_DPP01	1-7	MKTVLKCLLGLLALGVIITAIVVPIVLLTRDDTDTRRKFTLEDYLNNDFQYKSYNVRWMSGHEYVYTNQNNVFLYNIDDGKESIILSNNTLEDWNNSVAILSPDKKFALLRYNYEKVWRH	1-753
				SYTASYHIYDLNNRTIITENPLPETIQYISWSPAGHKLAYVYSNNIYVKTTPNAKPVEITENGAENKILNGLSDWVYEEEMFGTHCALWWSPNGSFLAFAEINDTEVPLIEYSFYSEDTL
				QYPKTIKIPYPKAGAINPTIRLFVVNILALPEKNISKIVAPSSITSGDHYLSVVTWVTDERICLQWLRRIQNFSVLTICDYSSGVWQCPKDREHLEESKTGWVGRFQPSEPYFASDKISY
				YRIISDSQGYKHIHYTDSTGKVKPITSGKWEVIDIAAVTNNSLYFISNEFDGRPGGRHLYKVDLKQDLKKTCITCDSNEEACQYFSVSFSTDARYYKLNCYGPGLPYFTLQNSSTDKAIK
				ILENNDNLKNVLKEIQMPSKRLRNITLHGQTYWYQMILPPNFDESKKYPLLIDVYAGPCSQKADAAFRINWSTYLASSEGIIVASFDGRGSGFQGDKILHAIYRRLGTYEVEDQISAAKL
				FSEMSFVDKDKMAIWGWSYGGYVTSMVLGAGSDVFKCGIAVAPVSRWQYYDSIYTERYMGLPEKNDNLHFYENSTVMARAKNFESVGYLLIHGTADDNVHFQQAAQISKALVDAQVDFQA
				MWYTDKDHGIDGHAHNHIYHHMSHFIKQCFKLP
		Acetylcholinesterase (AChE)
Q92035		acetylcholinesterase	1	MPSCQPGKMPAPWPWWLQLLLCIPSCVAVLPGRAGELKVSTQTGSVRGLSLPVLDGHVSAFLGIPFAEPPLGRMRFLRPEPVKPWQHVLDATSYKPACYQMVDTSYPGFQGTEMWNPNRG		Bungarus fasciatus
			2	MSEDCLYLNIWVPSPRPKDAPVLVWIYGGGFYSGAASLDVYDGRFLTYTQNVILVSLSYRVGAFGFLGLPGSPEAPGNMGLLDQRLALQWIQNNIHPFGGNPRAVTVFGESAGAASVGMH
			3	LLSTQSRTLFQRAILQSGGPNAPWATVTPAESRGRAALLGKQLGCHFNNDSELVSCLRSKNPQELIDEEWSVLPYKSIFRFPFVPVIDGDFFPDTPEAMLSSGNFKETQVLLGVVKDEGS
			4	YFLIYGLPGFSKDNESLISRADFLEGVRMSVPHANDIATDAVVLQYTDWQDQDNREKNREALDDIVGDHNVICPVVQFANDYAKRNSKVYAYLFDHRASNLLWPPWMGVPHGYEIEFVFG
			5	LPLNDSLNYTPQEKELSRRMMRYWANFARTGNPTDPADKSGAWPTYTASQPQYVQLNTQPLATQPSLRAQICAFWNHFLPKLLNATDNIEEAE-RQWKLEFHLWSAYMMHWKSQFDHYNK
			6	QDRCSEL
	33	NKM_ACE01	1-5	MPSCQPGEMPVLWPWWLQLL-CILSSVAVLPGRASELKVATQTGWVRGLSLPVLDGHVSAFLGVPFAEPPVGRMRFLRPEPVKPWQHVLDATSYQHACYQMVDDSYPGFQGTEMWNPNRG	1-579	IDENTICAL
				ISEDCLYLNIWVPSPRPRDVPVLVWIYGGGFYSGAASLDVYDGRFLTYTQNIILVSLSYRVGAFGFLGLPGSPEAPGNMGLLDQRLALQWIQNNIQHFGGNPRAVTIFGESAGAASVGMH
				LLSTQSRTLFQRAILQSGAPNAPWATITPAESRRRAALLGKQLGCHFNNDSELVSCLRSKTPQELIAKEWSVLPYKSIFRFPFVPVIDGDFFPDTPEAMLGSGNFKETQLLLGVVKDEGS
				YFLIYGLPGFSKDNESLINQADFLEGVRMGVPHANDIATEAVVLQYTDWQDQDNGEKNREALDDIVGDHNVICPVVQFANDYTKRNNKVYAYLFDHRASNLPWPPWMGVPHGYEIEFVFG
				LPLNDSLNYTPQEKELSRRMMRYWVNFARTGNPTDPADKNGAWPTYTASRPQYVQLNTQPLAIHHSLRAQICAFWNHFLPKLLNATVDPPRADLRRRSTR
		NKT_ACE01	1-6	MPSCQPGEMPVLWPWWLQLL-CILSSVAVLPGRASELKVATQTGWVRGLSLPVLDGHVSAFLGVPFAEPPVGRMRFLRPEPVKPWQHVLDATSYQHACYQMVDDSYPGFQGTEMWNPNRG	1-606
				ISEDCLYLNIWVPSPRPRDVPVLVWIYGGGFYSGAASLDVYDGRFLTYTQNIILVSLSYRVGAFGFLGLPGSPEAPGNMGLLDQRLALQWIQNNIQHFGGNPRAVTIFGESAGAASVGMH
				LLSTQSRTLFQRAILQSGAPNAPWATITPAESRRRAALLGKQLGCHFNNDSELVSCLRSKTPQELIAKEWSVLPYKSIFRFPFVPVIDGDFFPDTPEAMLGSGNFKETQLLLGVVKDEGS
				YFLIYGLPGFSKDNESLINQADFLEGVRMGVPHANDIATEAVVLQYTDWQDQDNGEKNREALDDIVGDHNVICPVVQFANDYTKRNNKVYAYLFDHRASNLPWPPWMGVPHGYEIEFVFG
				LPLNDSLNYTPQEKELSRRMMRYWVNFARTGNPTDPADKNGAWPTYTASRPQYVQLNTQPLAIHHSLRAQICAFWNHFLPKLLNATVDPPRADLRRRSTRFHLWSAYMMHWKSQFDHYNK
				QDRCSEL
		IDENTICAL (24 comparison pairs @ 73%)
		<2% DIFFER (5 comparison pairs @ 15%)
		2-10% DIFFER (3 comparison pairs @ 9%)
		>10% DIFFER (1 comparison pairs @ 3%)
		Novel transcripts identified from Malaysian Naja kaouthia (NK-M) and is the first revealed for Naja kaouthia species
		Novel transcripts identified from Thai Naja kaouthia (NK-T) and is the first revealed for Naja kaouthia species
